# Supplementary material
Source: PubMed Central journal article supplement (PMC4207537)
Supplement: jm500853v_si_001.pdf [file jm500853v_si_001.pdf]

## Supporting Information

### Synthesis, Structure-Activity Relationship Studies, and Antibacterial Evaluation of 4-Chromanones and Chalcones, as well as Olympicin A and Derivatives

Li Feng,<sup>†</sup> Marcus M. Maddox,<sup>‡,#</sup> Md. Zahidul Alam,<sup>§,#</sup> Lissa S. Tsutsumi,<sup>†</sup> Gagandeep Narula,<sup>‡</sup> David F. Bruhn,<sup>‡</sup> Xiaoqian Wu,<sup>§</sup> Shayna Sandhaus,<sup>‡</sup> Robin B. Lee,<sup>‡</sup> Charles J. Simmons,<sup>‡</sup> Yuk-Ching Tse-Dinh,<sup>‡</sup> Julian G. Hurdle,<sup>§</sup> Richard E. Lee,<sup>‡</sup> and Dianqing Sun<sup>\*,†</sup>

<sup>†</sup>Department of Pharmaceutical Sciences, The Daniel K. Inouye College of Pharmacy, University of Hawai'i at Hilo, 34 Rainbow Drive, Hilo, Hawaii 96720, United States

<sup>‡</sup>Department of Chemical Biology and Therapeutics, St. Jude Children's Research Hospital, Memphis, TN 38105, United States

<sup>§</sup>Department of Biology, University of Texas at Arlington, Arlington, Texas 76019, United States

<sup>‡</sup>Department of Chemistry & Biochemistry, Biomolecular Sciences Institute, Florida International University, Miami, Florida 33199, United States

<sup>‡</sup>Department of Chemistry, University of Hawai'i at Hilo, Hilo, Hawaii 96720, United States

<sup>#</sup>M.M.M and Md.Z.A contributed equally to the work

### Table of Contents

|                                                                                                   |         |
|---------------------------------------------------------------------------------------------------|---------|
| The <sup>1</sup> H and <sup>13</sup> C NMR spectra, HPLC profiles, and HRMS of <b>1b-8m</b> ..... | S2-S184 |
| Figure S1. ORTEP views of the molecular structures of <b>3g</b> and <b>8a</b> .....               | S185    |
| Figure S2. Inhibition against bacterial DNA gyrase and topoisomerase IV.....                      | S187    |

$^1\text{H}$  and  $^{13}\text{C}$  NMR spectra of **1b**

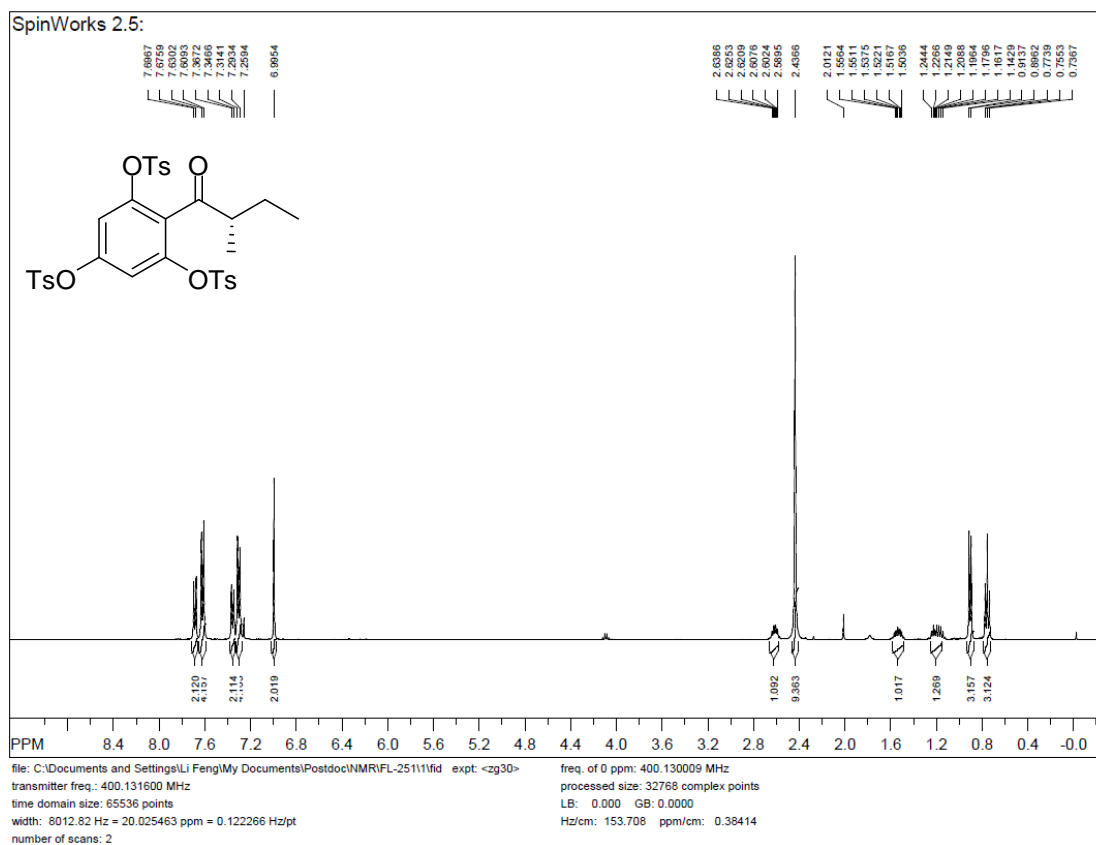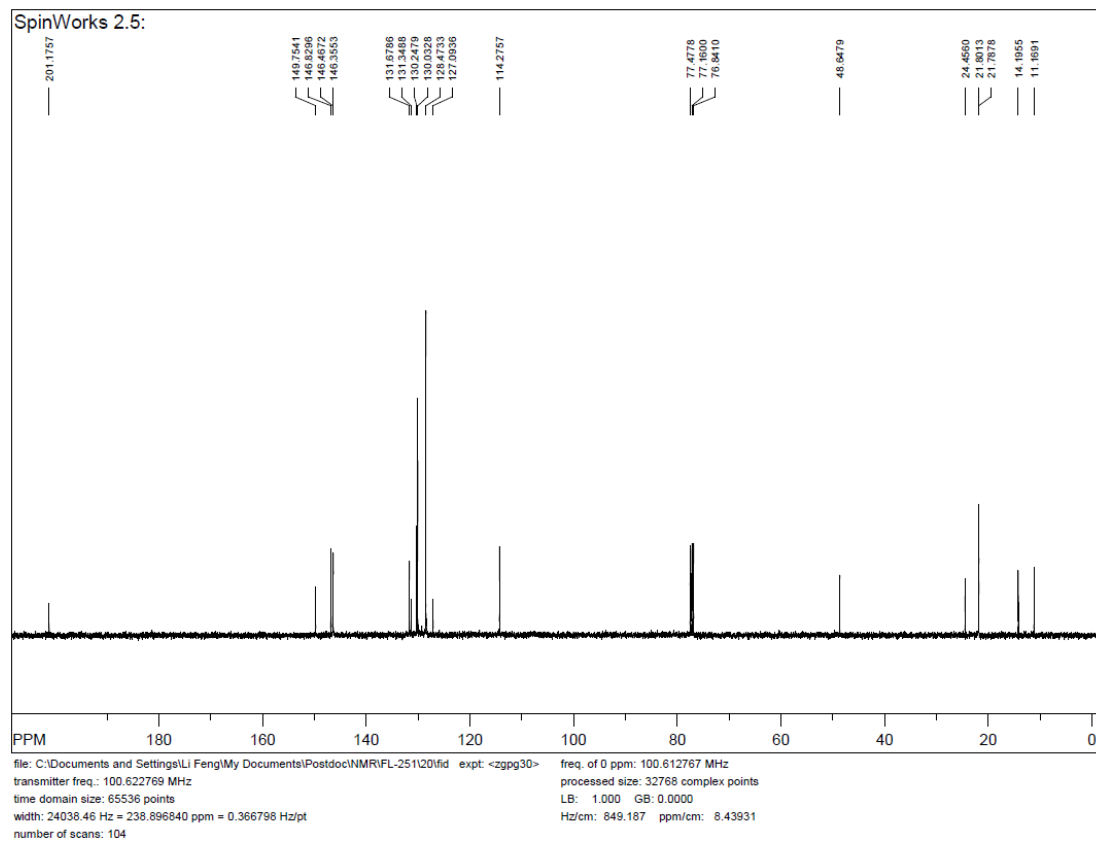

HPLC profile of 1b

==== Shimadzu LCsolution Analysis Report ====

Sample Name : FL-251-P  
 Tray# : 1  
 Vial# : 91  
 Injection Volume : 8 uL  
 Data File Name : FL-251-P.lcd  
 Method File Name : SDQ gradient.lcm  
 Batch File Name :  
 Data Acquired : 6/7/2012 3:48:24 PM

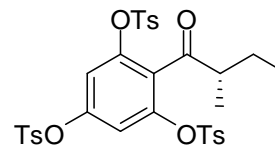

<Chromatogram>

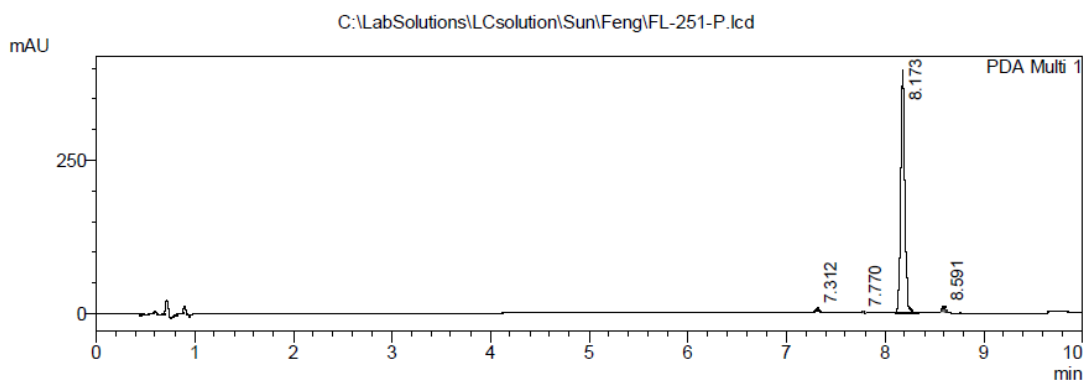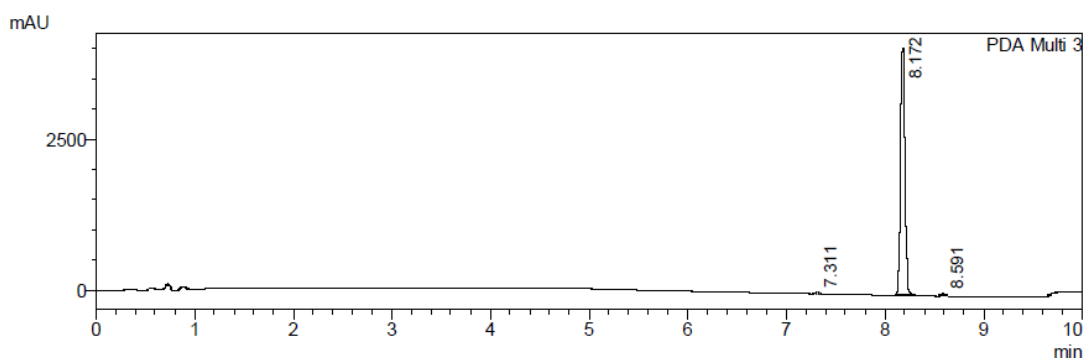

- 1 PDA Multi 1/254nm 4nm
- 2 PDA Multi 3/220nm 4nm

PeakTable

PDA Ch1 254nm 4nm

| Peak# | Ret. Time | Area    | Height | Area %  | Height % |
|-------|-----------|---------|--------|---------|----------|
| 1     | 7.312     | 4791    | 3189   | 0.443   | 0.794    |
| 2     | 7.770     | 242     | 254    | 0.022   | 0.063    |
| 3     | 8.173     | 1065416 | 391979 | 98.558  | 97.564   |
| 4     | 8.591     | 10553   | 6343   | 0.976   | 1.579    |
| Total |           | 1081002 | 401764 | 100.000 | 100.000  |

PeakTable

PDA Ch3 220nm 4nm

| Peak# | Ret. Time | Area     | Height  | Area %  | Height % |
|-------|-----------|----------|---------|---------|----------|
| 1     | 7.311     | 8966     | 6681    | 0.072   | 0.163    |
| 2     | 8.172     | 12363084 | 4070455 | 99.502  | 99.098   |
| 3     | 8.591     | 52881    | 30379   | 0.426   | 0.740    |
| Total |           | 12424931 | 4107515 | 100.000 | 100.000  |

# HRMS of 1b

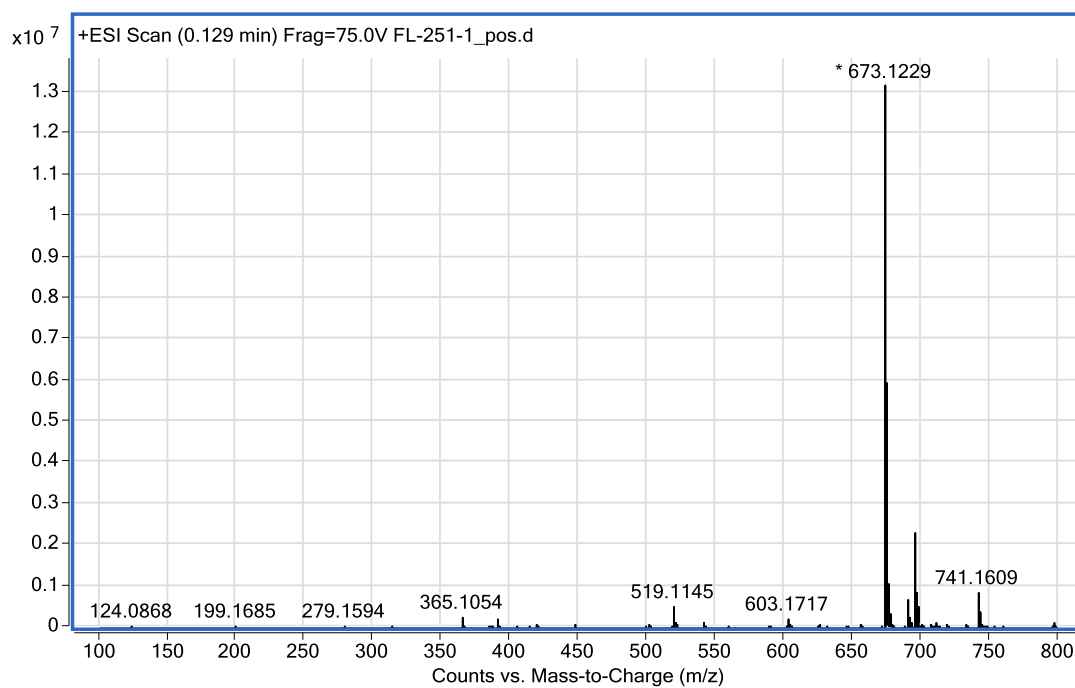

$^1\text{H}$  and  $^{13}\text{C}$  NMR spectra of **1c**

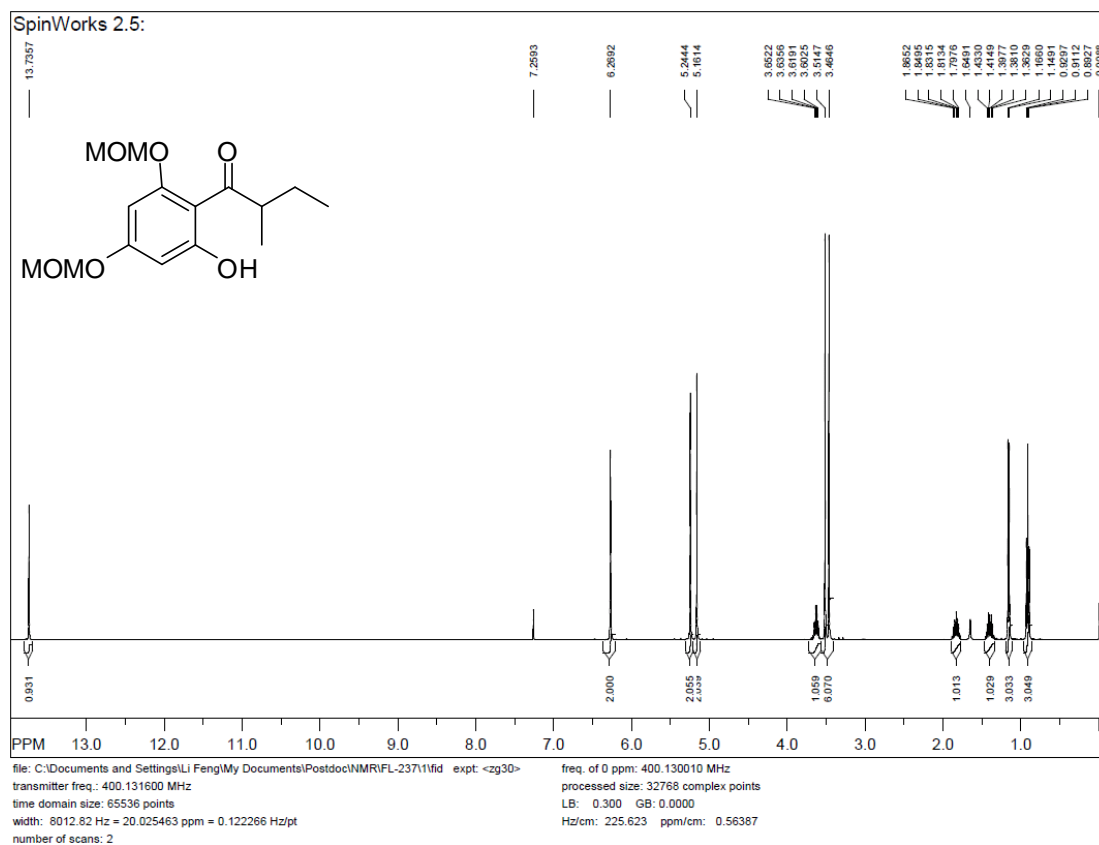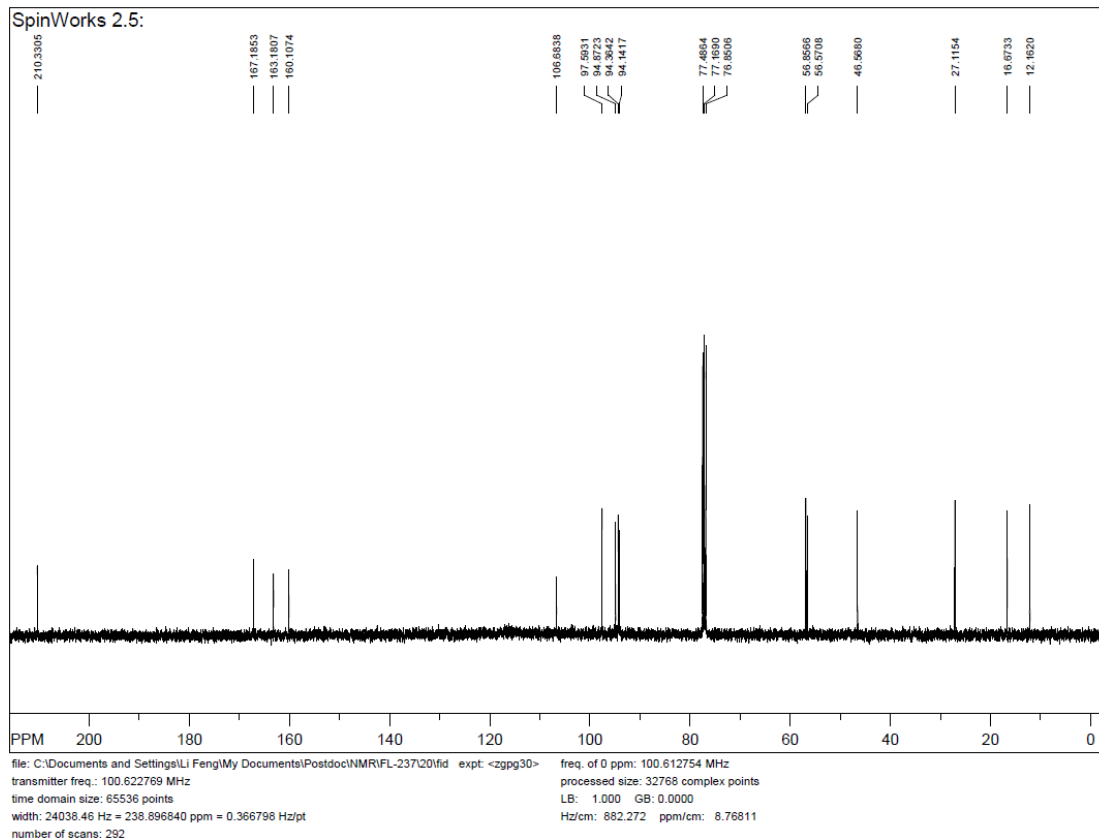

HPLC profile of 1c

==== Shimadzu LCsolution Analysis Report ====

C:\LabSolutions\LCsolution\Sun\Feng\FL-229-P.lcd

Sample Name : FL-229-P  
 Tray# : 1  
 Vial # : 91  
 Injection Volume : 10 uL  
 Data File Name : FL-229-P.lcd  
 Method File Name : SDQ gradient.lcm  
 Batch File Name :  
 Data Acquired : 5/16/2012 9:57:54 AM

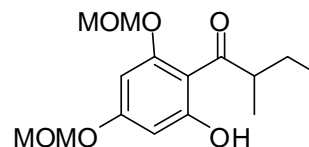

<Chromatogram>

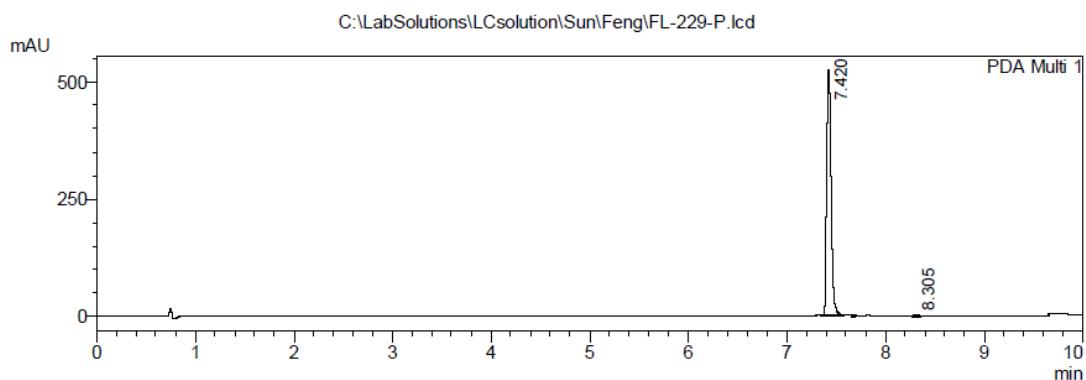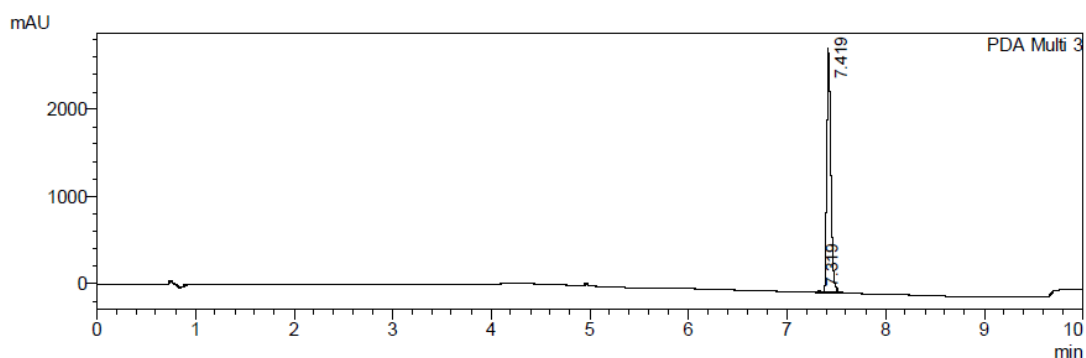

- 1 PDA Multi 1/254nm 4nm
- 2 PDA Multi 3/220nm 4nm

PeakTable

PDA Ch1 254nm 4nm

| Peak# | Ret. Time | Area    | Height | Area %  | Height % |
|-------|-----------|---------|--------|---------|----------|
| 1     | 7.420     | 1519821 | 523211 | 99.824  | 99.768   |
| 2     | 8.305     | 2675    | 1217   | 0.176   | 0.232    |
| Total |           | 1522496 | 524428 | 100.000 | 100.000  |

PeakTable

PDA Ch3 220nm 4nm

| Peak# | Ret. Time | Area    | Height  | Area %  | Height % |
|-------|-----------|---------|---------|---------|----------|
| 1     | 7.319     | 15979   | 7857    | 0.223   | 0.281    |
| 2     | 7.419     | 7142456 | 2788923 | 99.777  | 99.719   |
| Total |           | 7158435 | 2796779 | 100.000 | 100.000  |

# HRMS of 1c

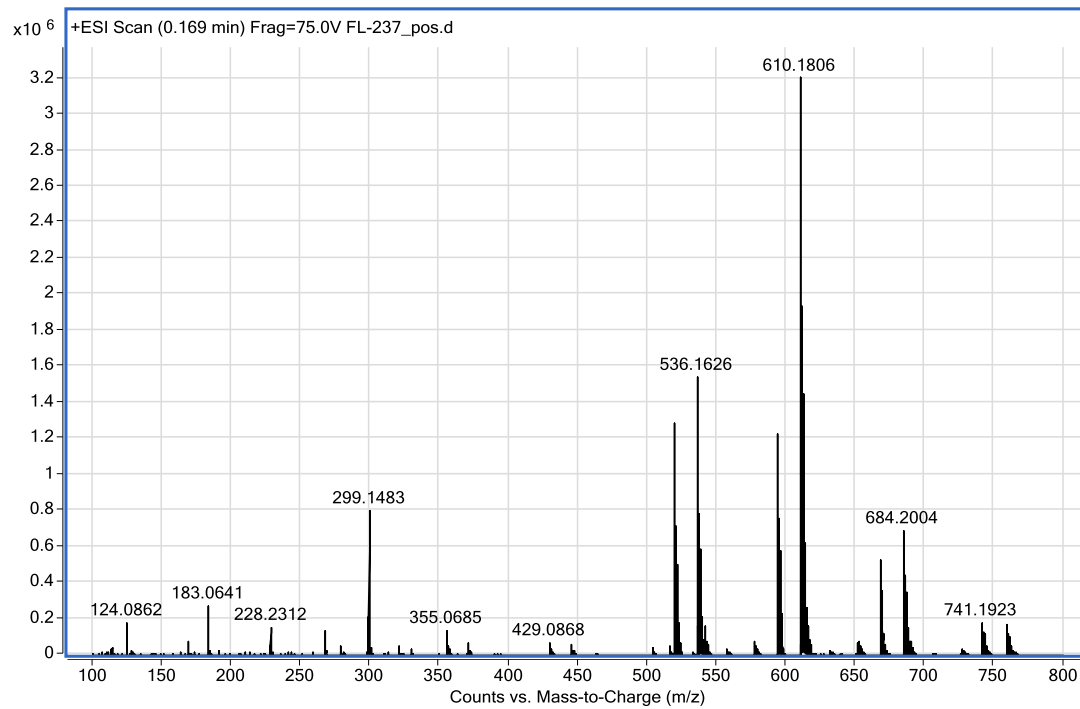

$^1\text{H}$  and  $^{13}\text{C}$  NMR spectra of **1c'**

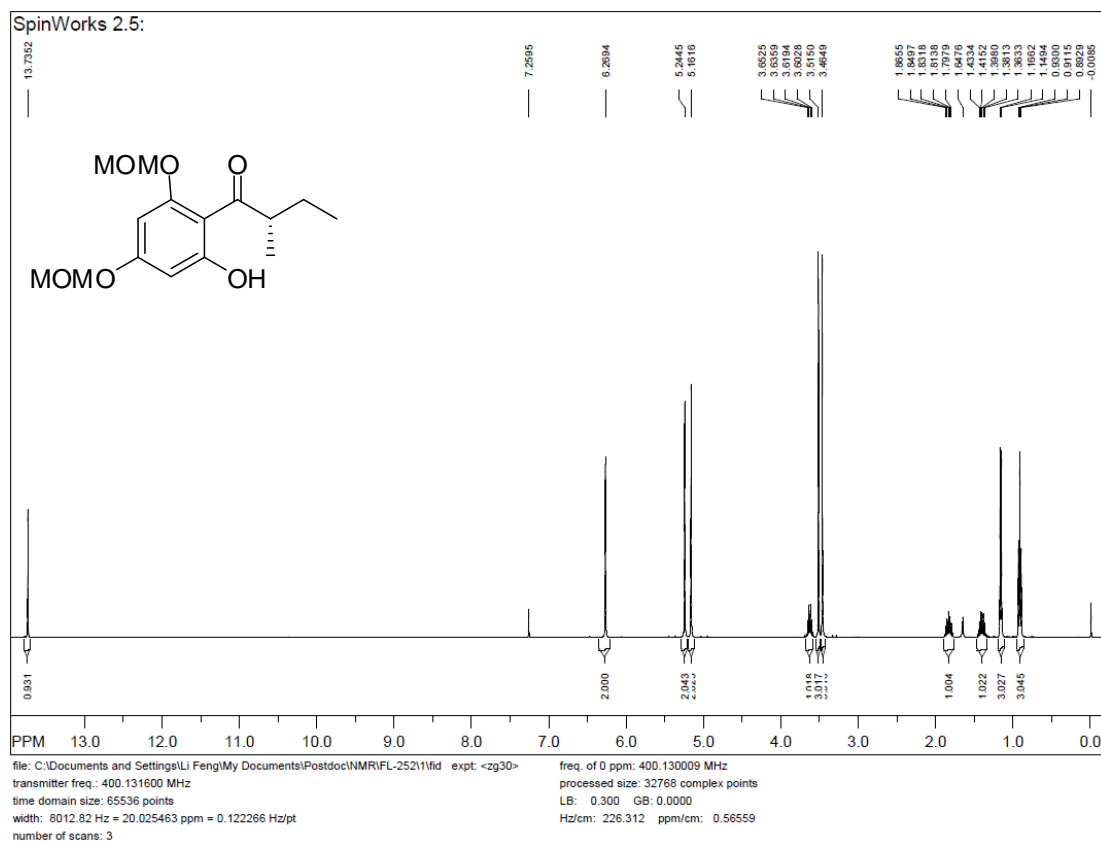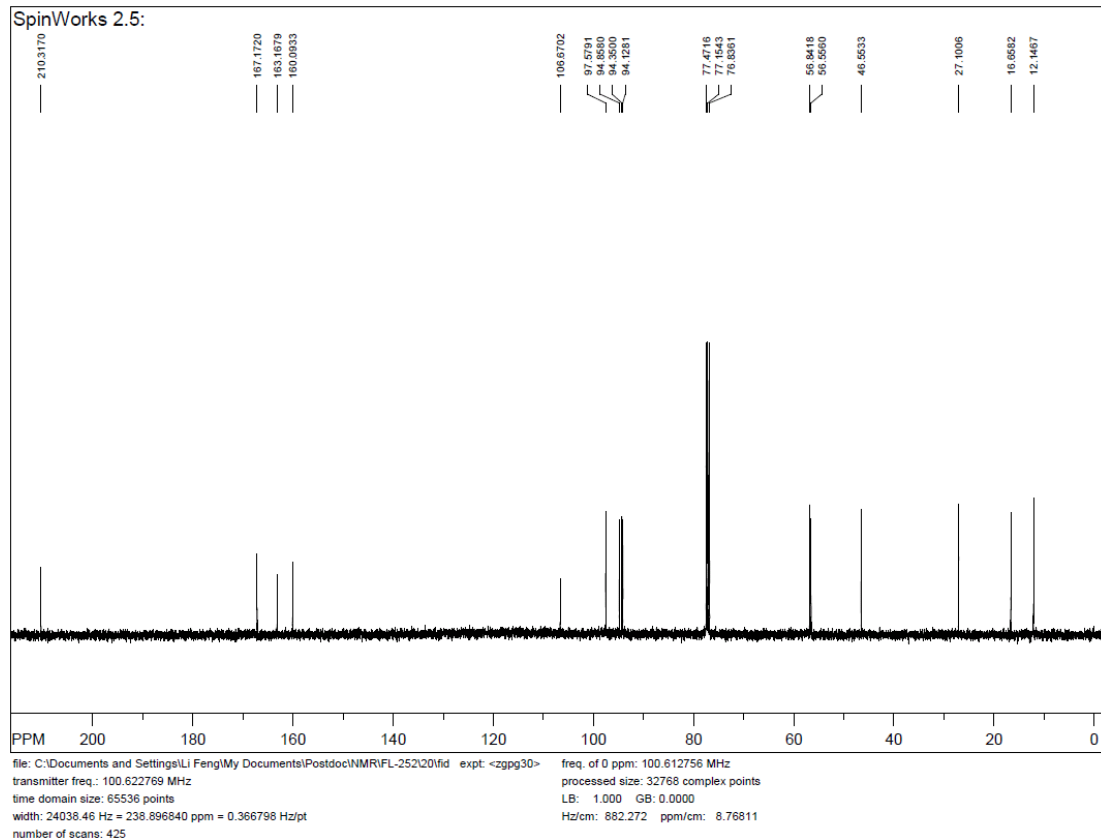



HPLC profile of 1c'

==== Shimadzu LCsolution Analysis Report ====

Sample Name : FL-252-P  
 Tray# : 1  
 Vial# : 91  
 Injection Volume : 3 uL  
 Data File Name : FL-252-P.lcd  
 Method File Name : SDQ.gradient.lcm  
 Batch File Name :  
 Data Acquired : 7/31/2012 4:08:32 PM

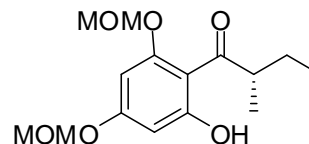

<Chromatogram>

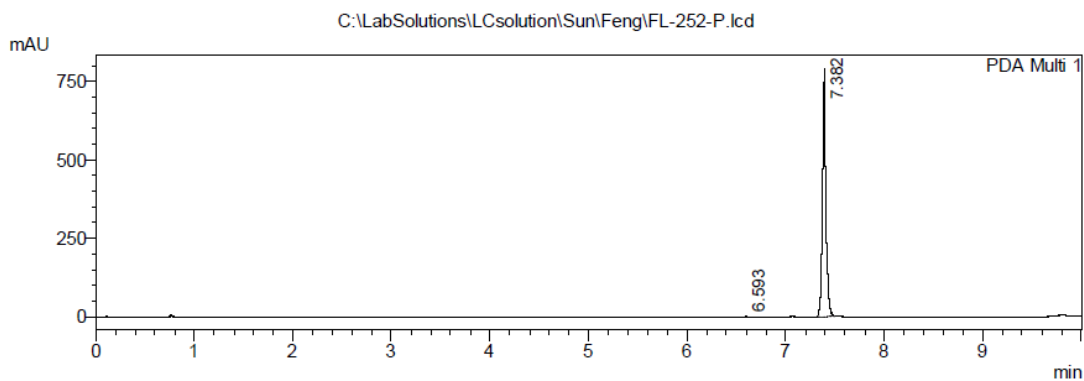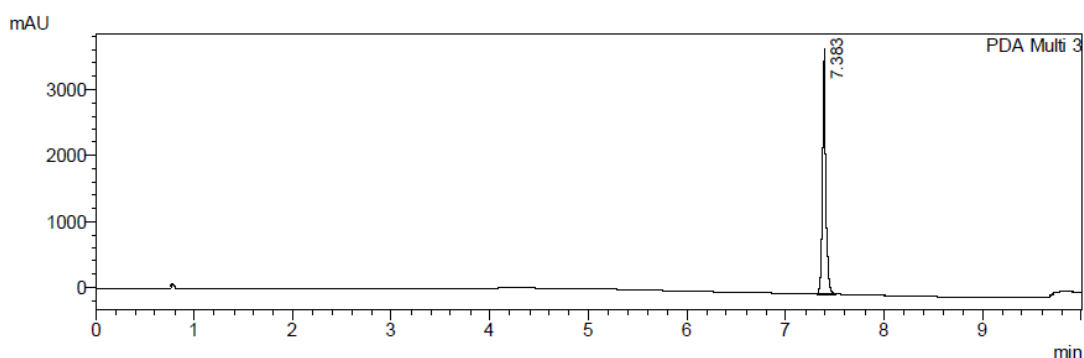

- 1 PDA Multi 1/254nm 4nm
- 2 PDA Multi 3/220nm 4nm

PeakTable

PDA Ch1 254nm 4nm

| Peak# | Ret. Time | Area    | Height | Area %  | Height % |
|-------|-----------|---------|--------|---------|----------|
| 1     | 6.593     | 866     | 435    | 0.038   | 0.056    |
| 2     | 7.382     | 2252220 | 781651 | 99.962  | 99.944   |
| Total |           | 2253086 | 782086 | 100.000 | 100.000  |

PeakTable

PDA Ch3 220nm 4nm

| Peak# | Ret. Time | Area     | Height  | Area %  | Height % |
|-------|-----------|----------|---------|---------|----------|
| 1     | 7.383     | 10184818 | 3706299 | 100.000 | 100.000  |
| Total |           | 10184818 | 3706299 | 100.000 | 100.000  |

### HRMS of 1c'

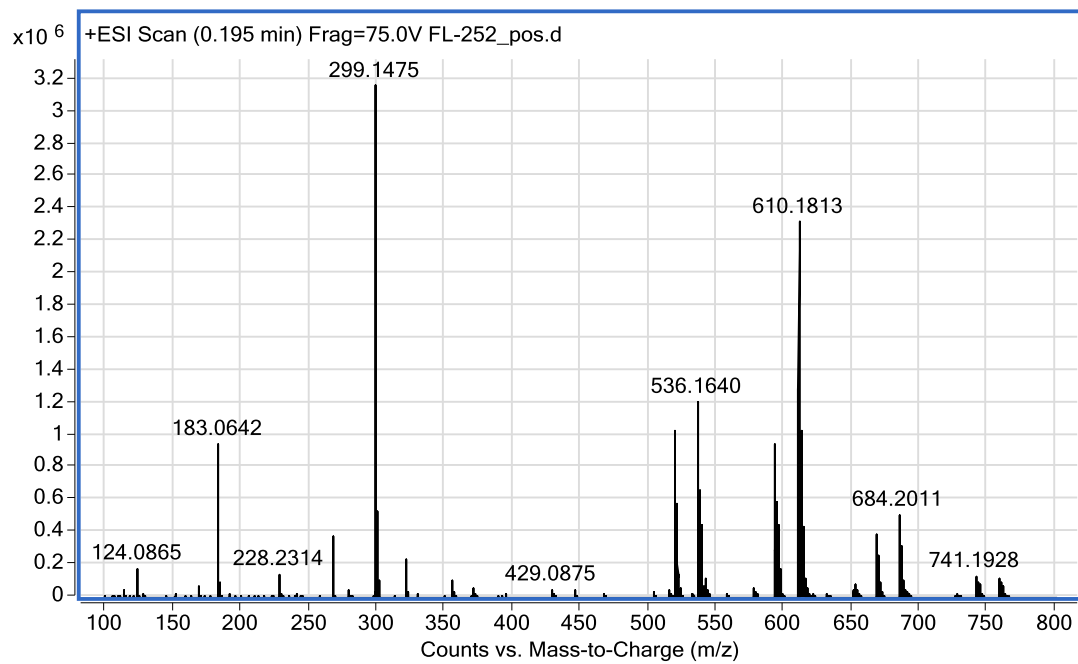

$^1\text{H}$  and  $^{13}\text{C}$  NMR spectra of **2a**

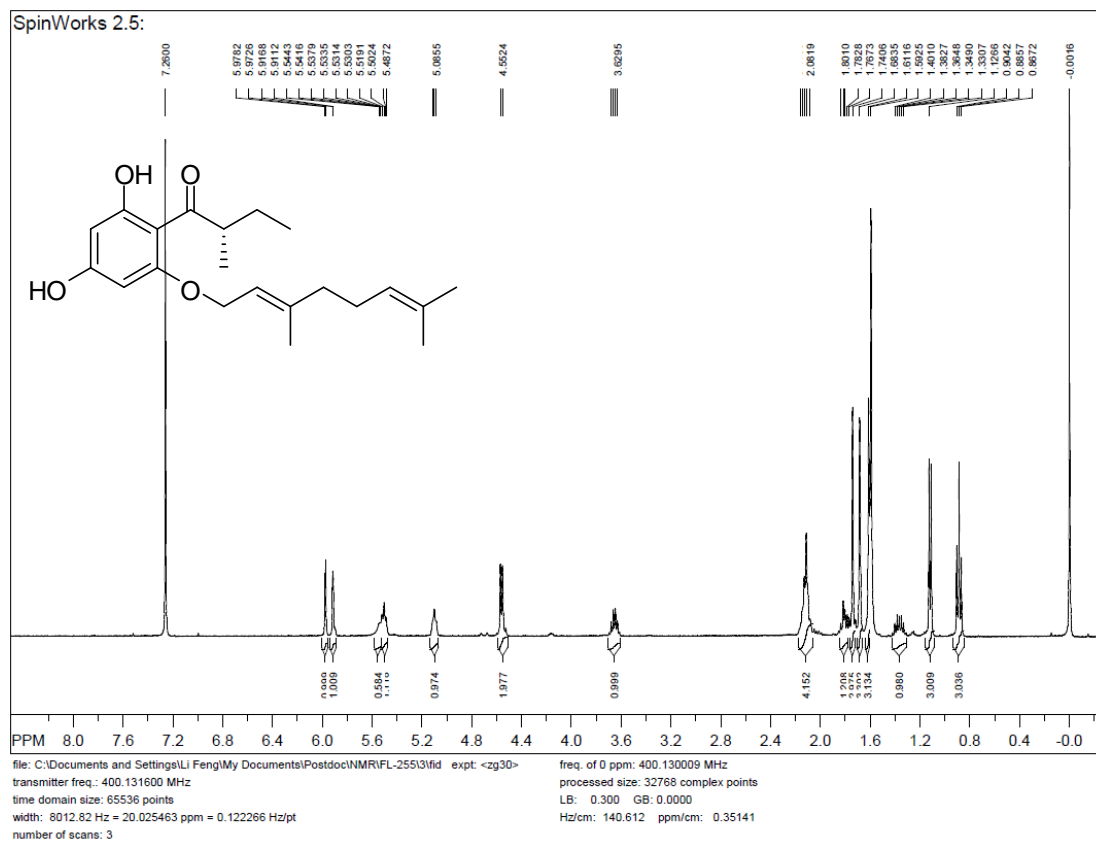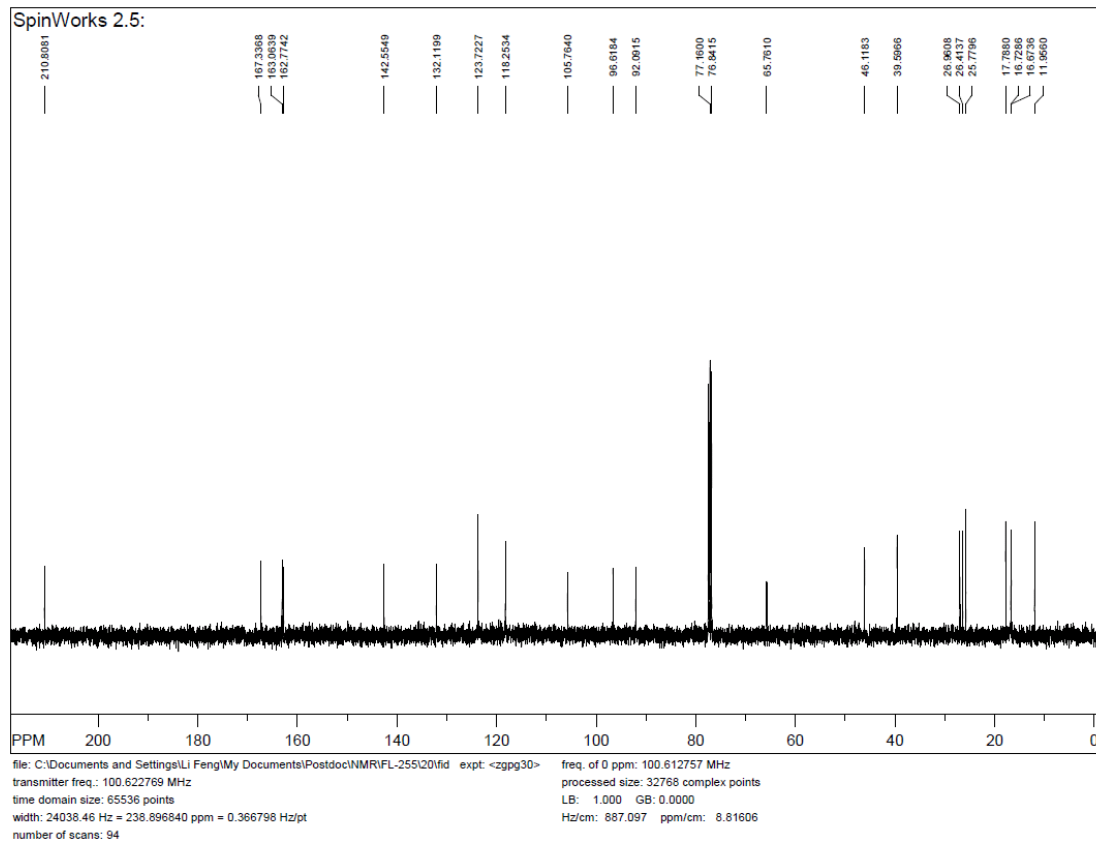

HPLC profile of **2a**

==== Shimadzu LCsolution Analysis Report ====

C:\LabSolutions\LCsolution\Sun\Feng\FL-255-P.lcd

Sample Name : FL-255-P  
 Tray# : 1  
 Vial # : 91  
 Injection Volume : 8 uL  
 Data File Name : FL-255-P.lcd  
 Method File Name : SDQ gradient.lcm  
 Batch File Name :  
 Data Acquired : 6/13/2012 1:40:37 PM

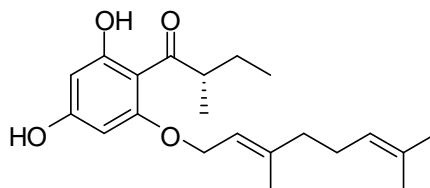

<Chromatogram>

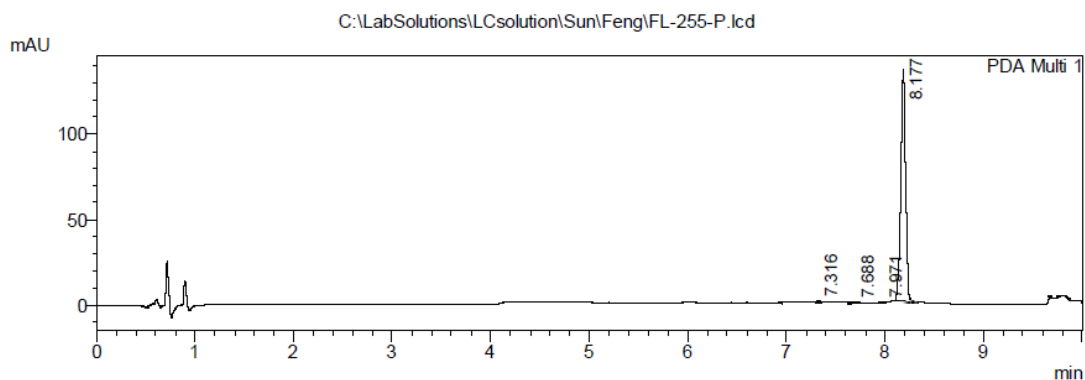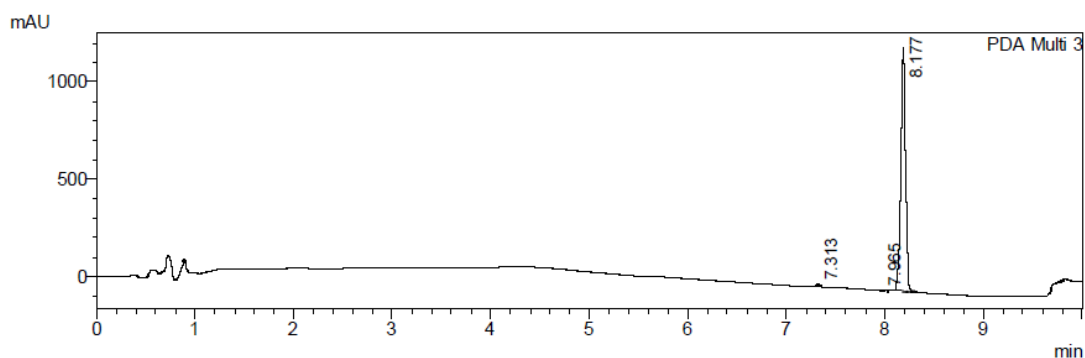

- 1 PDA Multi 1/254nm 4nm
- 2 PDA Multi 3/220nm 4nm

PeakTable

PDA Ch1 254nm 4nm

| Peak# | Ret. Time | Area   | Height | Area %  | Height % |
|-------|-----------|--------|--------|---------|----------|
| 1     | 7.316     | 347    | 196    | 0.081   | 0.146    |
| 2     | 7.688     | 520    | 280    | 0.122   | 0.209    |
| 3     | 7.971     | 523    | 300    | 0.123   | 0.224    |
| 4     | 8.177     | 425020 | 133101 | 99.674  | 99.421   |
| Total |           | 426411 | 133877 | 100.000 | 100.000  |

PeakTable

PDA Ch3 220nm 4nm

| Peak# | Ret. Time | Area    | Height  | Area %  | Height % |
|-------|-----------|---------|---------|---------|----------|
| 1     | 7.313     | 12194   | 5706    | 0.321   | 0.456    |
| 2     | 7.965     | 1316    | 1029    | 0.035   | 0.082    |
| 3     | 8.177     | 3779906 | 1243950 | 99.644  | 99.462   |
| Total |           | 3793416 | 1250684 | 100.000 | 100.000  |

# HRMS of 2a

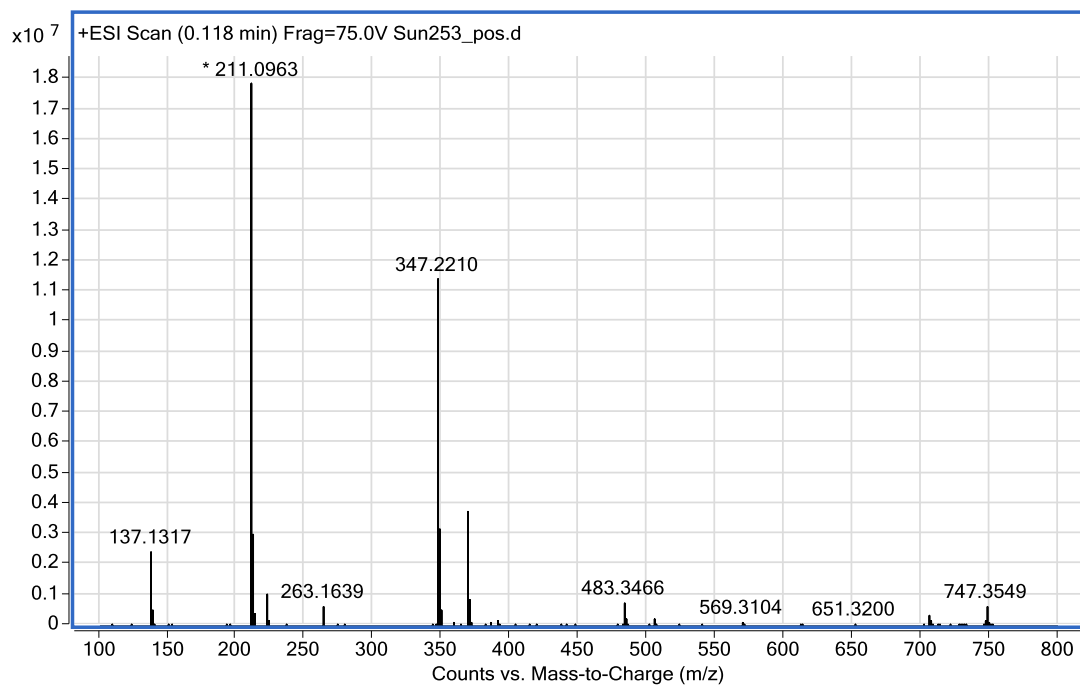

<sup>1</sup>H and <sup>13</sup>C NMR spectra of **2b**

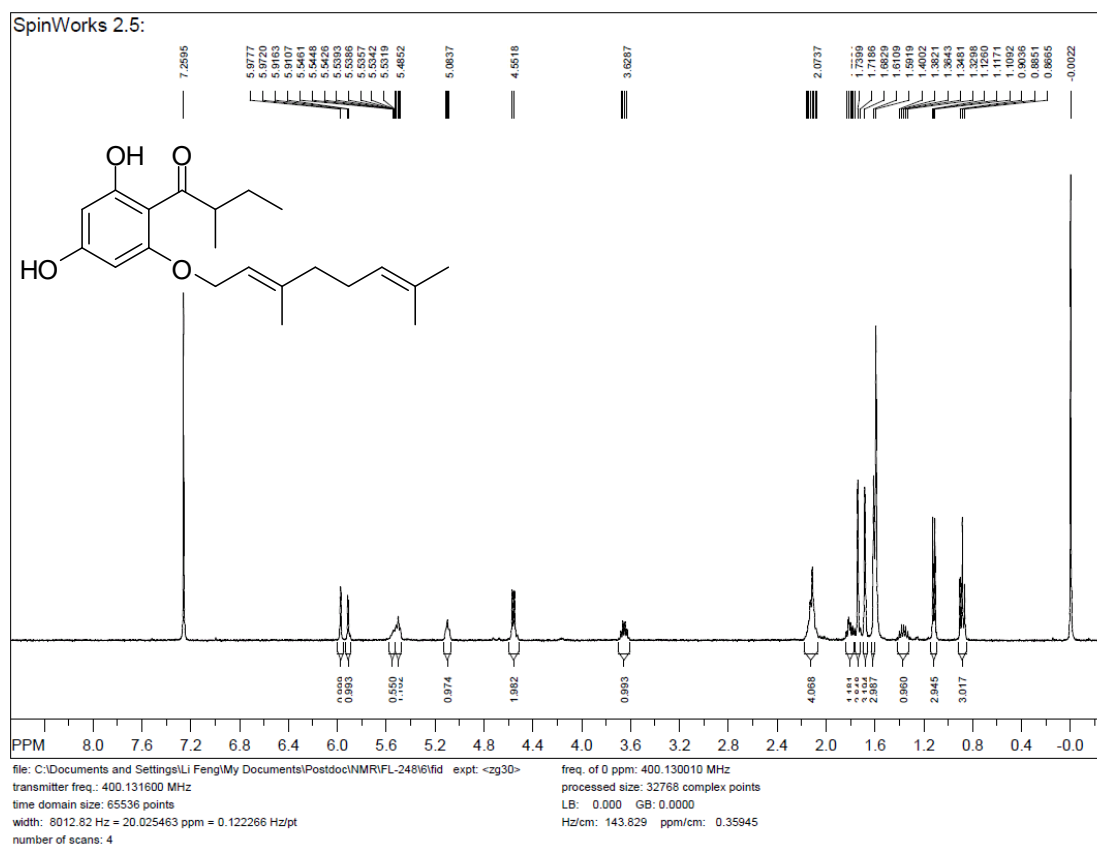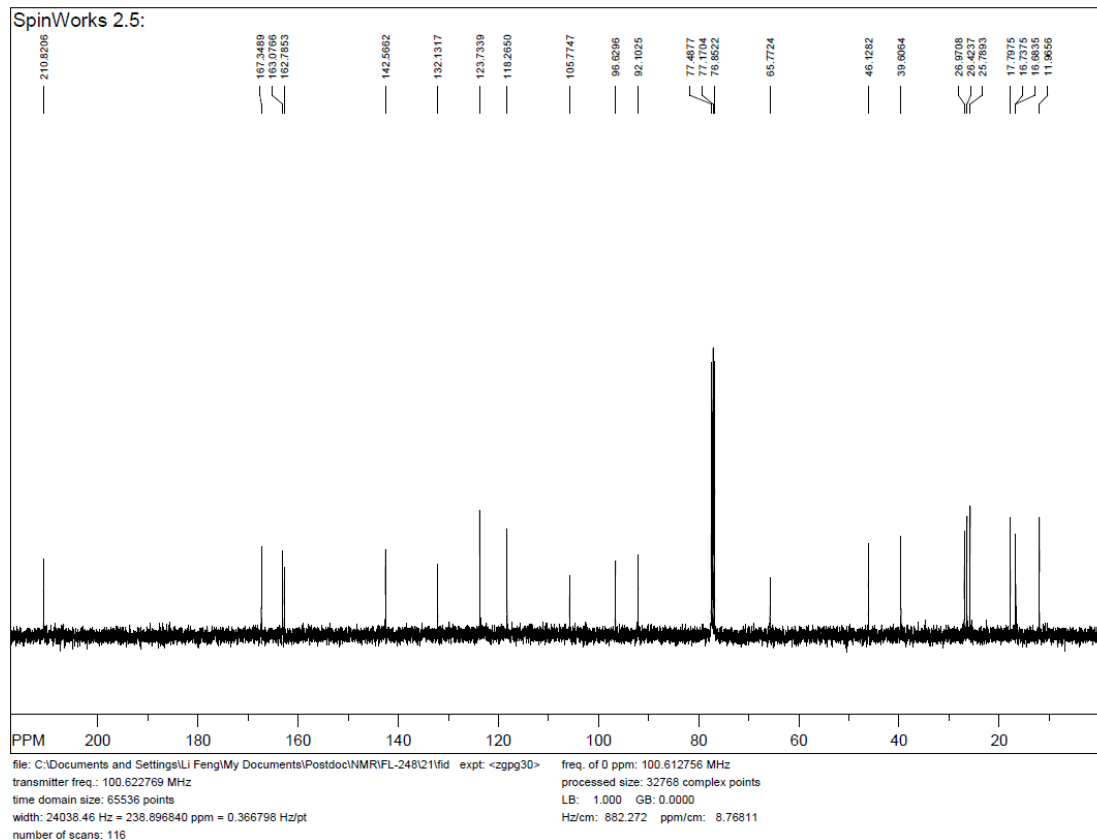

HPLC profile of **2b**

==== Shimadzu LCsolution Analysis Report ====

Sample Name : FL-248-P  
 Tray# : 1  
 Vial # : 91  
 Injection Volume : 10 uL  
 Data File Name : FL-248-P.lcd  
 Method File Name : SDQ gradient.lcm  
 Batch File Name :  
 Data Acquired : 6/4/2012 3:59:46 PM

C:\LabSolutions\LCsolution\Sun\Feng\FL-248-P.lcd

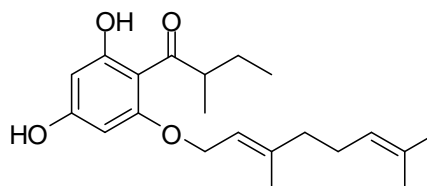

<Chromatogram>

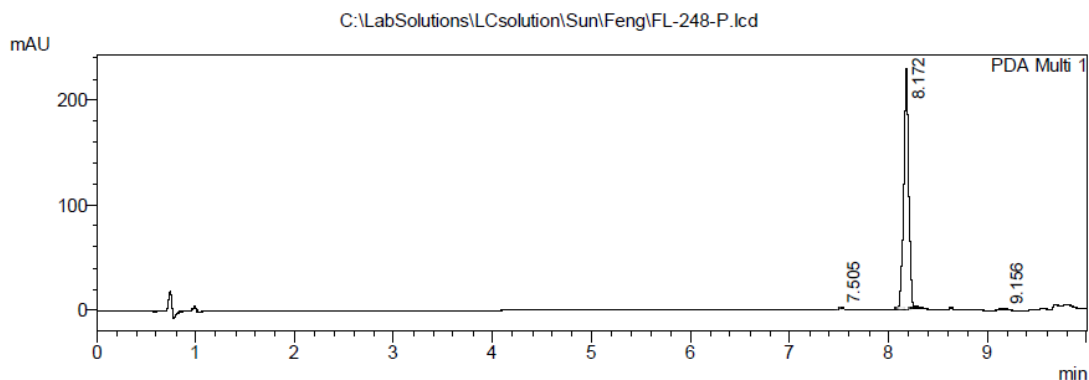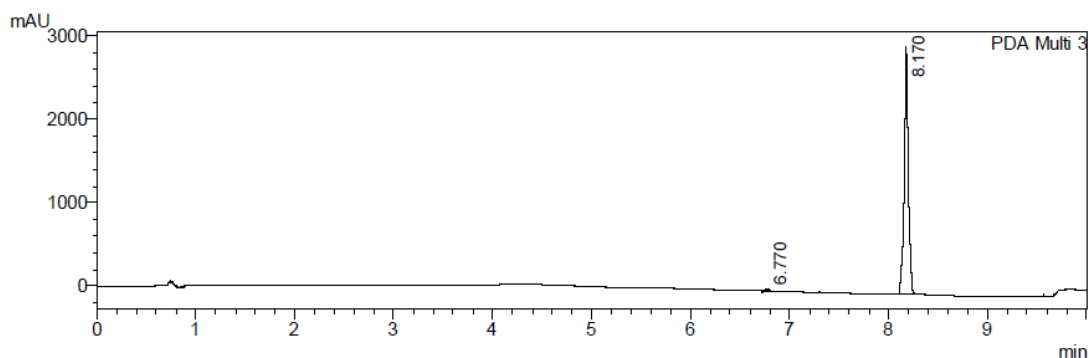

- 1 PDA Multi 1/254nm 4nm
- 2 PDA Multi 3/220nm 4nm

PeakTable

PDA Ch1 254nm 4nm

| Peak#        | Ret. Time | Area          | Height        | Area %         | Height %       |
|--------------|-----------|---------------|---------------|----------------|----------------|
| 1            | 7.505     | 1320          | 506           | 0.177          | 0.222          |
| 2            | 8.172     | 741412        | 227279        | 99.650         | 99.573         |
| 3            | 9.156     | 1281          | 468           | 0.172          | 0.205          |
| <b>Total</b> |           | <b>744014</b> | <b>228253</b> | <b>100.000</b> | <b>100.000</b> |

PeakTable

PDA Ch3 220nm 4nm

| Peak#        | Ret. Time | Area           | Height         | Area %         | Height %       |
|--------------|-----------|----------------|----------------|----------------|----------------|
| 1            | 6.770     | 28572          | 14248          | 0.366          | 0.479          |
| 2            | 8.170     | 7787460        | 2959100        | 99.634         | 99.521         |
| <b>Total</b> |           | <b>7816033</b> | <b>2973348</b> | <b>100.000</b> | <b>100.000</b> |

# HRMS of 2b

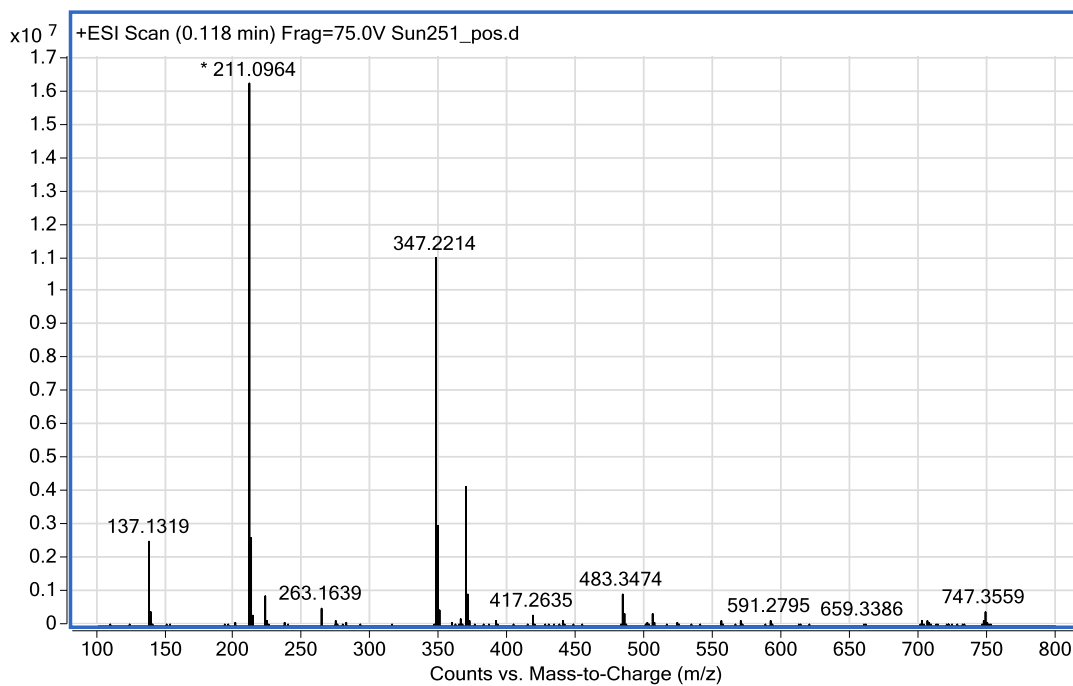



$^1\text{H}$  and  $^{13}\text{C}$  NMR spectra of **2c**

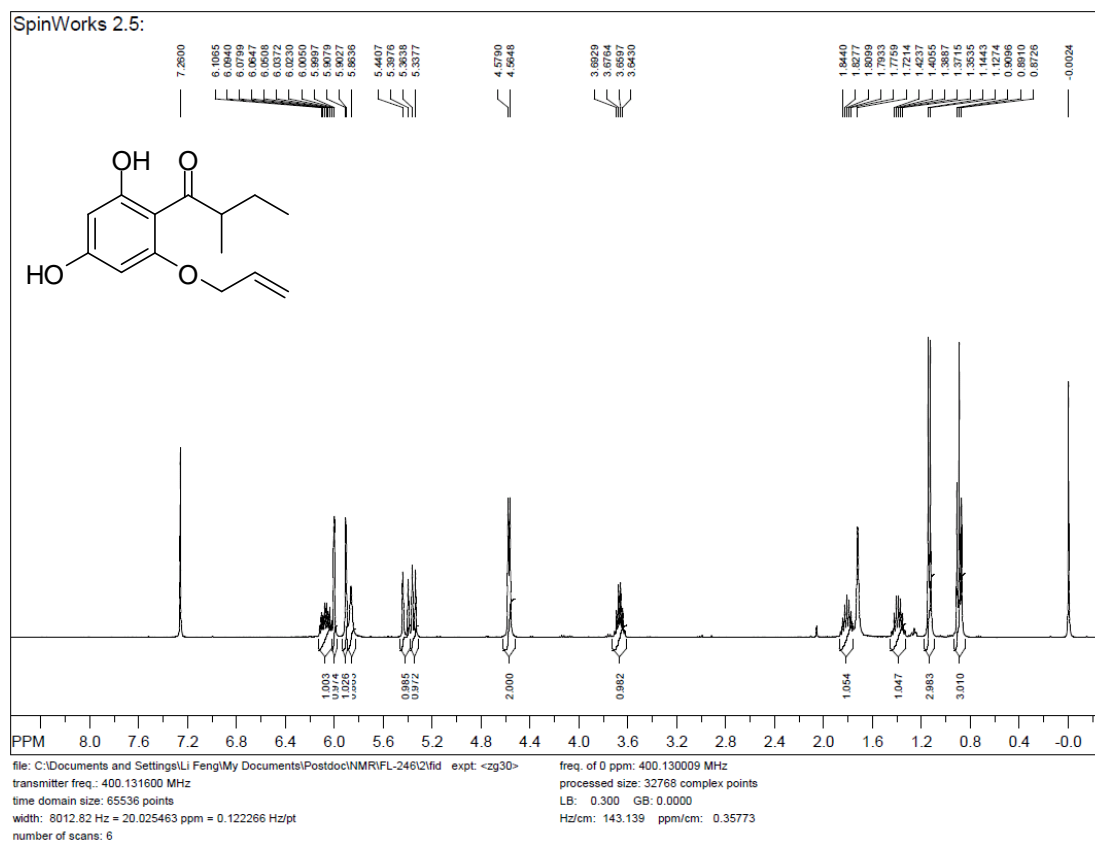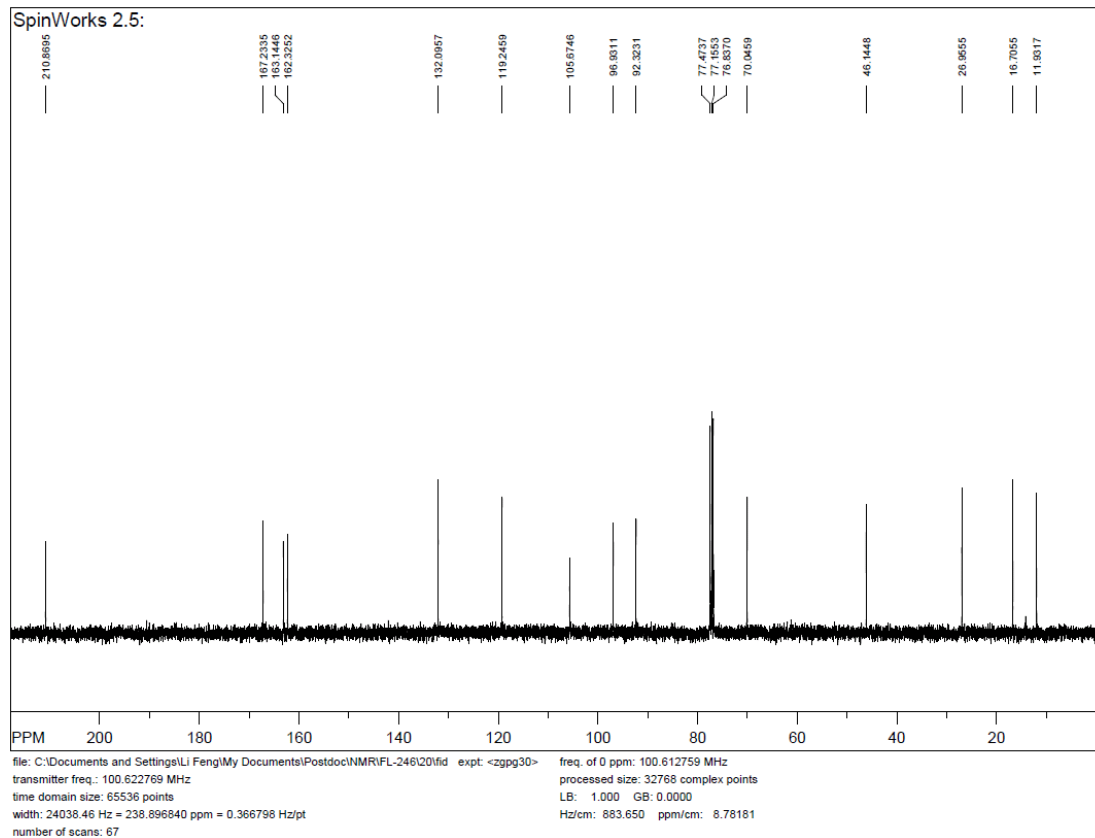

HPLC profile of 2c

==== Shimadzu LCsolution Analysis Report ====

C:\LabSolutions\LCsolution\Sun\Feng\FL-246-P.lcd

Sample Name : FL-246-P  
 Tray# : 1  
 Vail # : 91  
 Injection Volume : 10 uL  
 Data File Name : FL-246-P.lcd  
 Method File Name : SDQ gradient.lcm  
 Batch File Name :  
 Data Acquired : 6/1/2012 2:46:45 PM

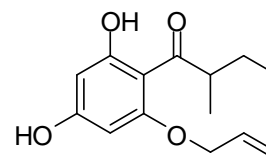

<Chromatogram>

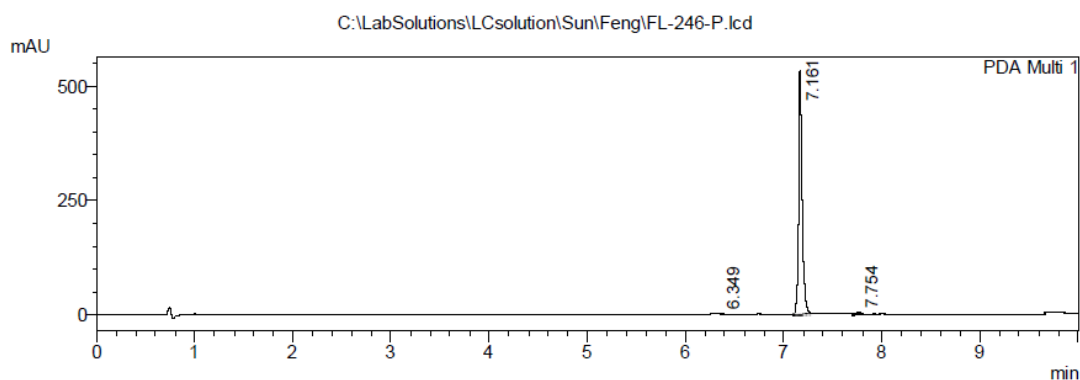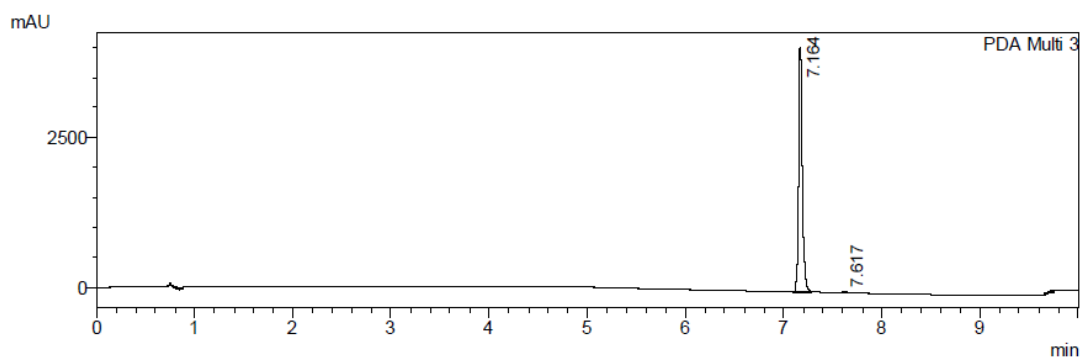

- 1 PDA Multi 1/254nm 4nm
- 2 PDA Multi 3/220nm 4nm

PeakTable

PDA Ch1 254nm 4nm

| Peak# | Ret. Time | Area    | Height | Area %  | Height % |
|-------|-----------|---------|--------|---------|----------|
| 1     | 6.349     | 631     | 503    | 0.042   | 0.096    |
| 2     | 7.161     | 1515756 | 521833 | 99.671  | 99.453   |
| 3     | 7.754     | 4375    | 2365   | 0.288   | 0.451    |
| Total |           | 1520762 | 524701 | 100.000 | 100.000  |

PeakTable

PDA Ch3 220nm 4nm

| Peak# | Ret. Time | Area     | Height  | Area %  | Height % |
|-------|-----------|----------|---------|---------|----------|
| 1     | 7.164     | 12501034 | 4065092 | 99.855  | 99.738   |
| 2     | 7.617     | 18210    | 10677   | 0.145   | 0.262    |
| Total |           | 12519244 | 4075768 | 100.000 | 100.000  |

# HRMS of 2c

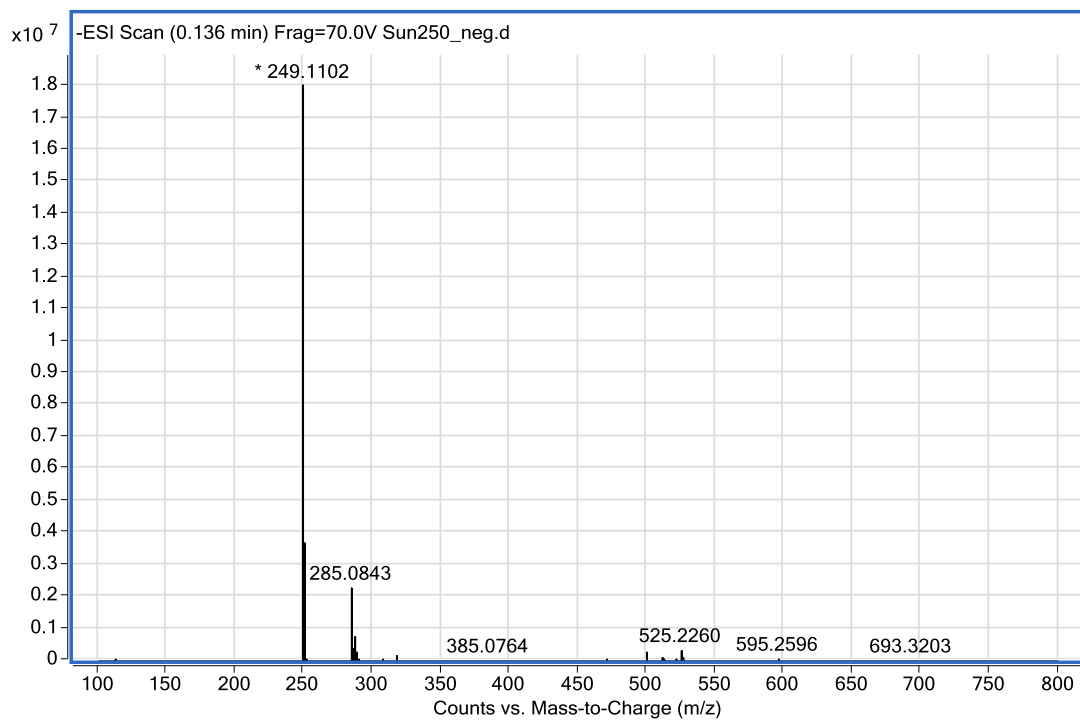

$^1\text{H}$  and  $^{13}\text{C}$  NMR spectra of **2d**

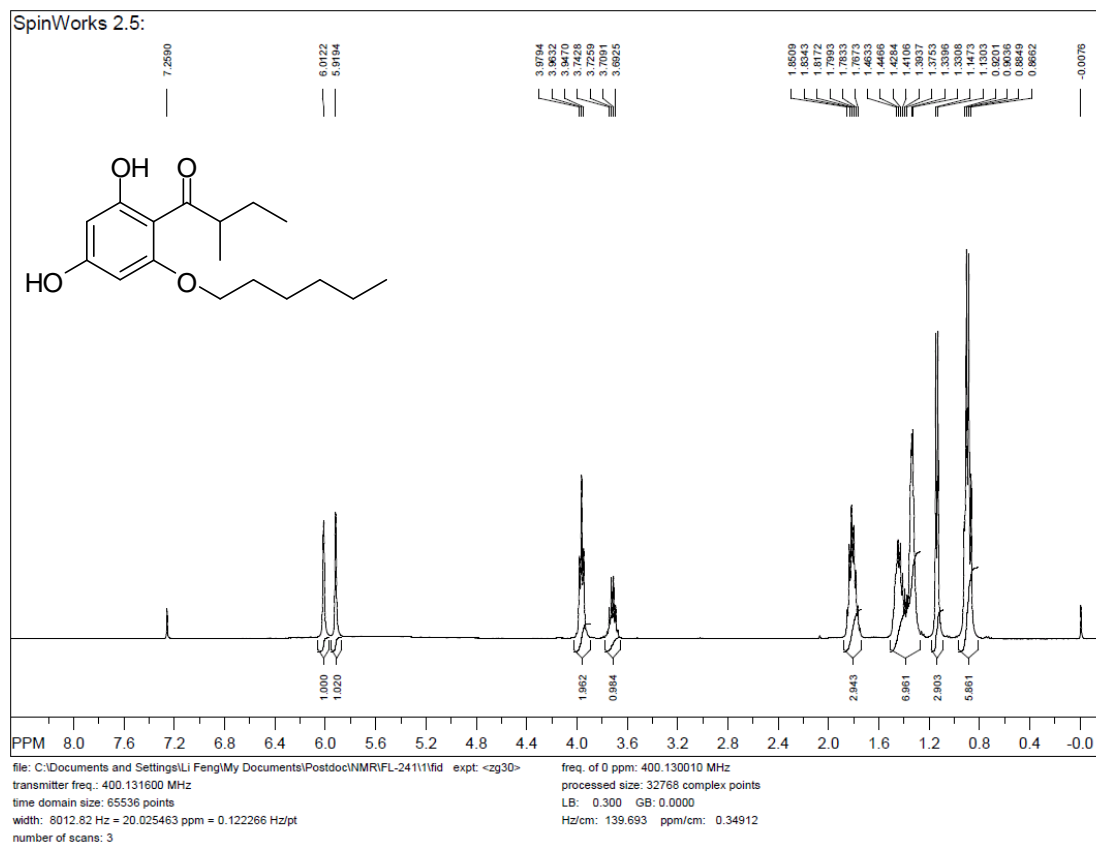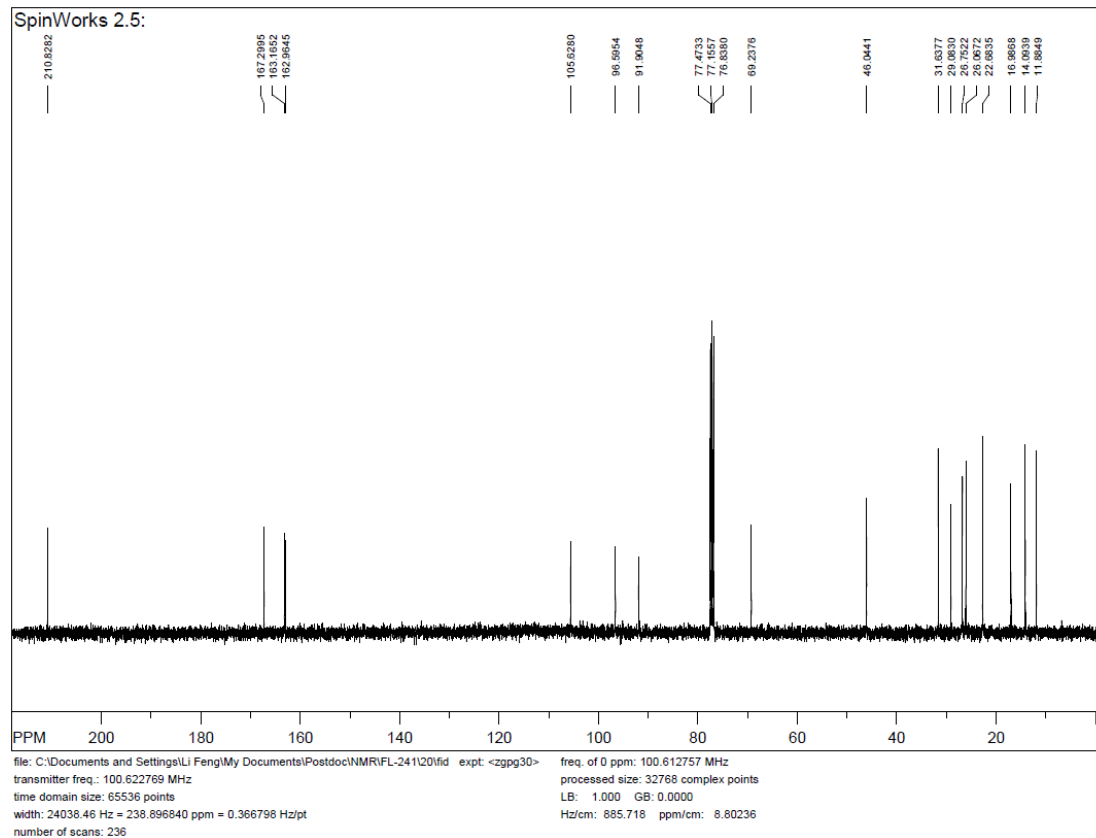

HPLC profile of **2d**

==== Shimadzu LCsolution Analysis Report ====

Sample Name : FL-241-P  
 Tray# : 1  
 Vial# : 91  
 Injection Volume : 18 uL  
 Data File Name : FL-241-P.lcd  
 Method File Name : SDQ gradient.lcm  
 Batch File Name :  
 Data Acquired : 6/1/2012 4:28:09 PM

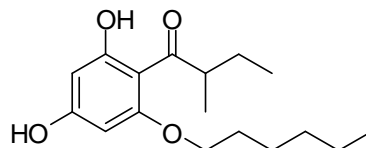

<Chromatogram>

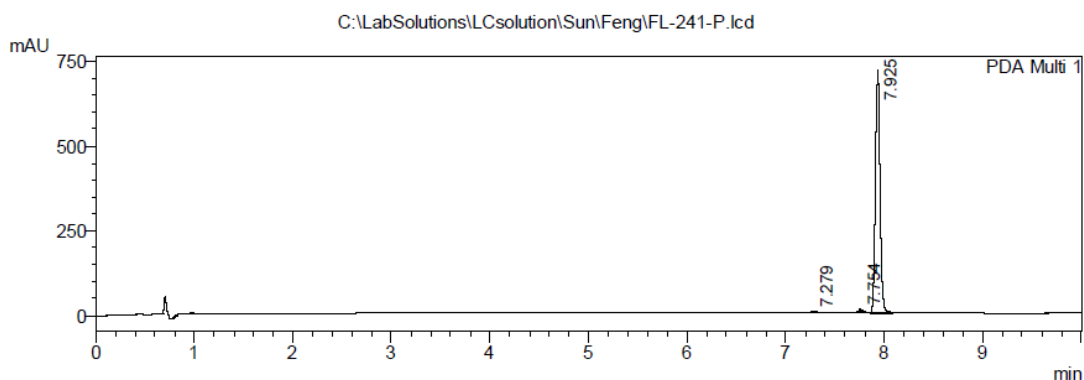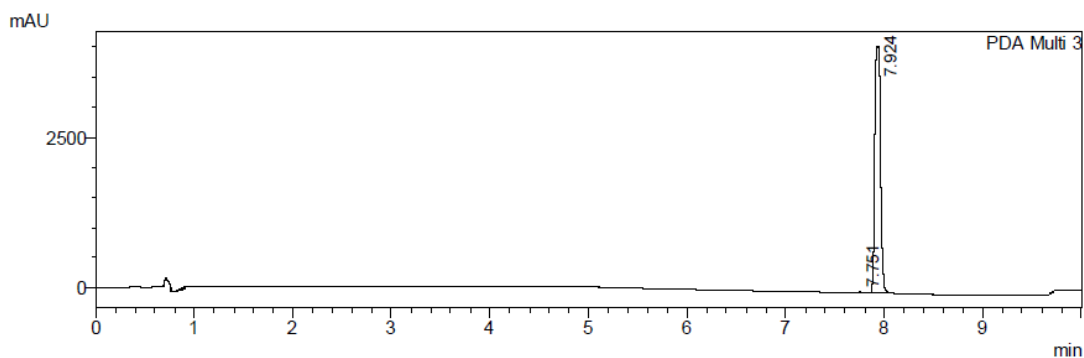

- 1 PDA Multi 1/254nm 4nm
- 2 PDA Multi 3/220nm 4nm

PeakTable

PDA Ch1 254nm 4nm

| Peak# | Ret. Time | Area    | Height | Area %  | Height % |
|-------|-----------|---------|--------|---------|----------|
| 1     | 7.279     | 1687    | 1123   | 0.081   | 0.157    |
| 2     | 7.754     | 14637   | 6910   | 0.703   | 0.964    |
| 3     | 7.925     | 2064677 | 708547 | 99.216  | 98.879   |
| Total |           | 2081000 | 716580 | 100.000 | 100.000  |

PeakTable

PDA Ch3 220nm 4nm

| Peak# | Ret. Time | Area     | Height  | Area %  | Height % |
|-------|-----------|----------|---------|---------|----------|
| 1     | 7.751     | 17290    | 9465    | 0.116   | 0.232    |
| 2     | 7.924     | 14885157 | 4069609 | 99.884  | 99.768   |
| Total |           | 14902447 | 4079075 | 100.000 | 100.000  |

# HRMS of 2d

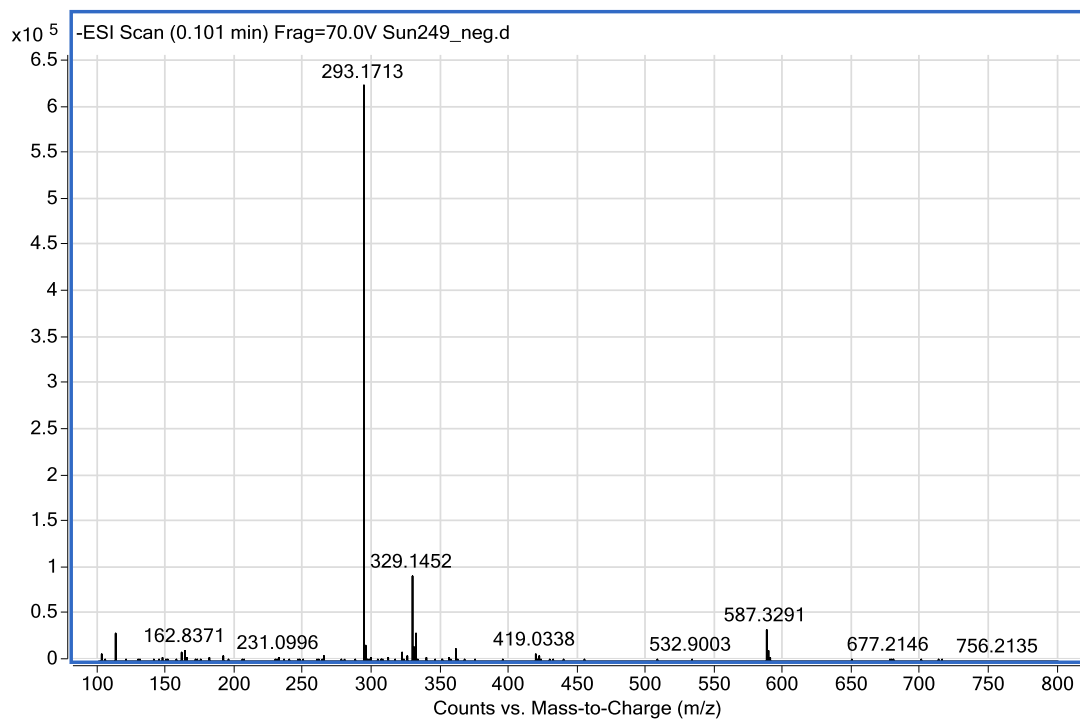

$^1\text{H}$  and  $^{13}\text{C}$  NMR spectra of **2e**

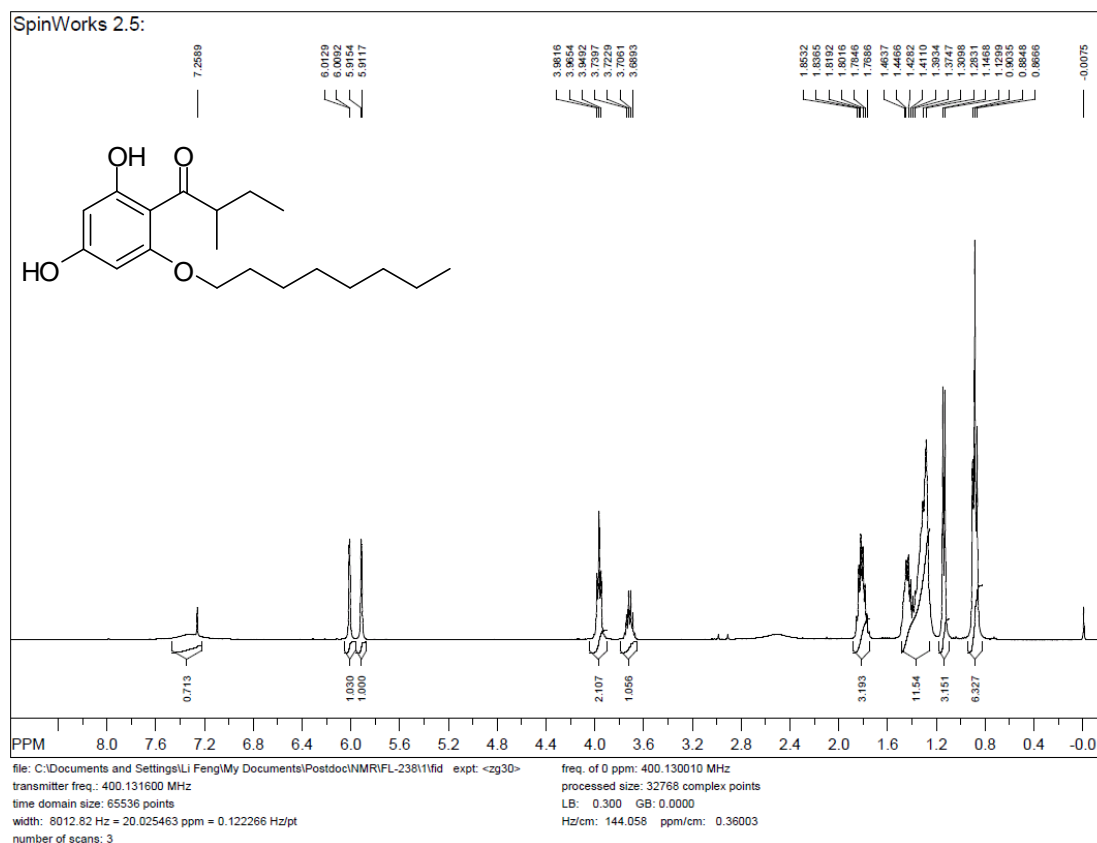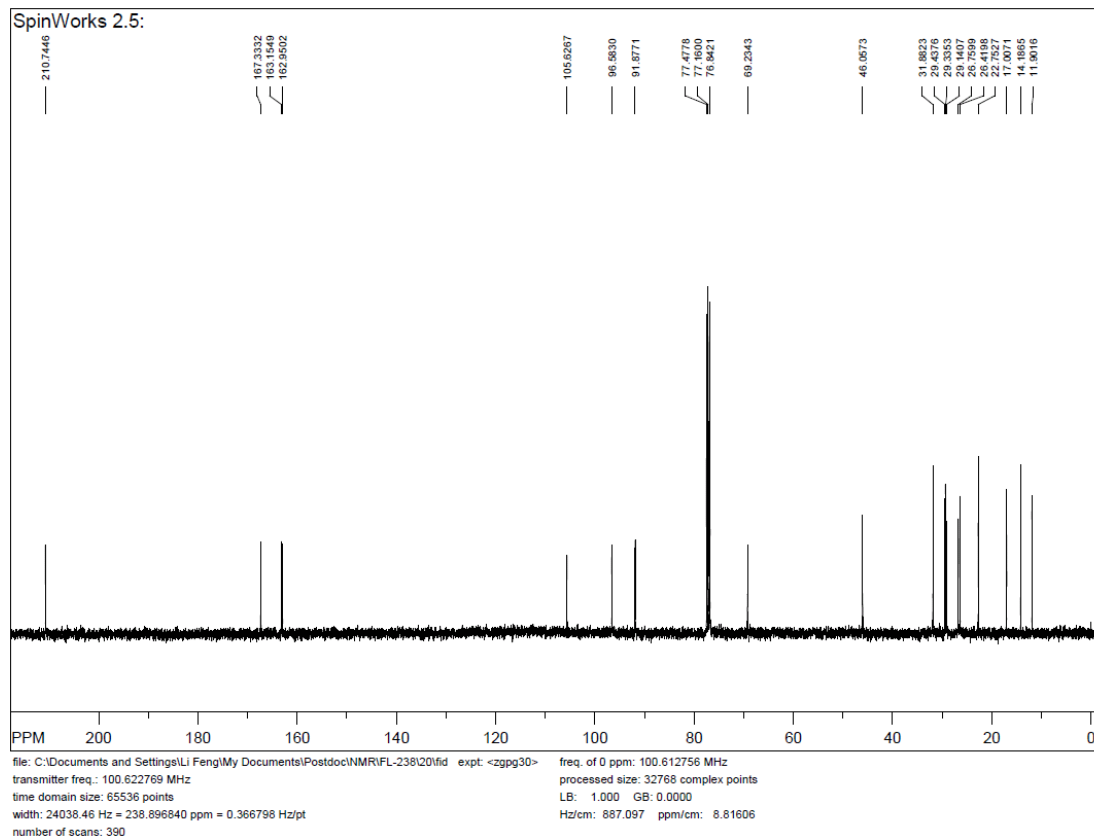

HPLC profile of 2e

==== Shimadzu LCsolution Analysis Report ====

C:\LabSolutions\LCsolution\Sun\Feng\FL-238-P.lcd

Sample Name : FL-238-P  
 Tray# : 1  
 Vial # : 91  
 Injection Volume : 6 uL  
 Data File Name : FL-238-P.lcd  
 Method File Name : SDQ gradient.lcm  
 Batch File Name :  
 Data Acquired : 5/29/2012 9:50:37 AM

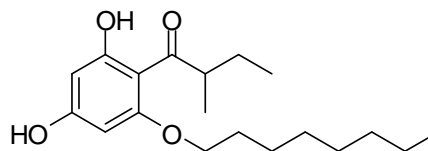

<Chromatogram>

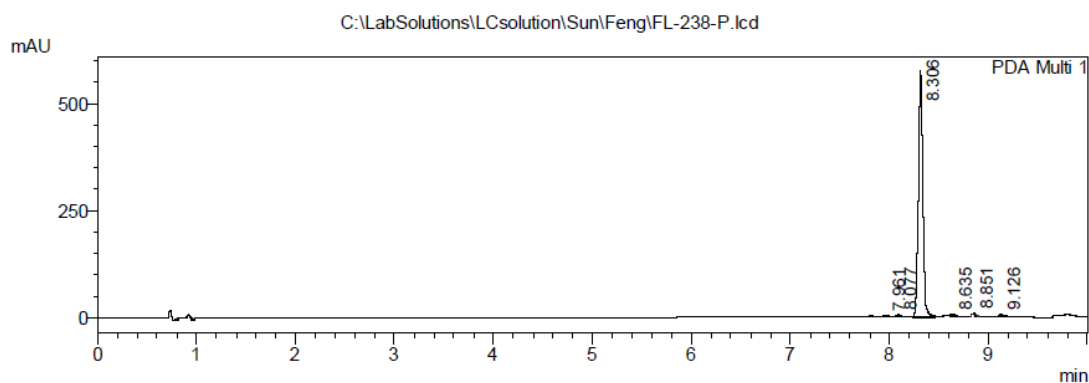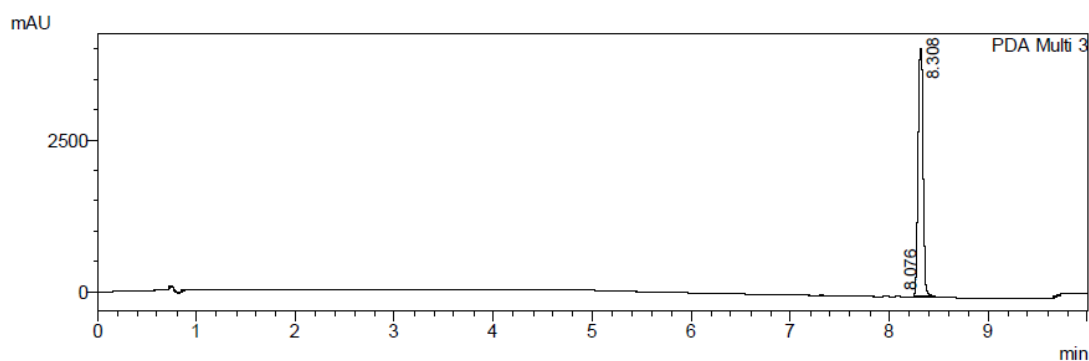

- 1 PDA Multi 1/254nm 4nm
- 2 PDA Multi 3/220nm 4nm

PeakTable

PDA Ch1 254nm 4nm

| Peak# | Ret. Time | Area    | Height | Area %  | Height % |
|-------|-----------|---------|--------|---------|----------|
| 1     | 7.961     | 2986    | 1988   | 0.177   | 0.345    |
| 2     | 8.077     | 1801    | 1522   | 0.107   | 0.264    |
| 3     | 8.306     | 1669319 | 565216 | 98.768  | 98.072   |
| 4     | 8.635     | 4884    | 2071   | 0.289   | 0.359    |
| 5     | 8.851     | 6814    | 3447   | 0.403   | 0.598    |
| 6     | 9.126     | 4333    | 2087   | 0.256   | 0.362    |
| Total |           | 1690137 | 576330 | 100.000 | 100.000  |

PeakTable

PDA Ch3 220nm 4nm

| Peak# | Ret. Time | Area     | Height  | Area %  | Height % |
|-------|-----------|----------|---------|---------|----------|
| 1     | 8.076     | 5486     | 4481    | 0.040   | 0.110    |
| 2     | 8.308     | 13579648 | 4076754 | 99.960  | 99.890   |
| Total |           | 13585135 | 4081235 | 100.000 | 100.000  |



# HRMS of 2e

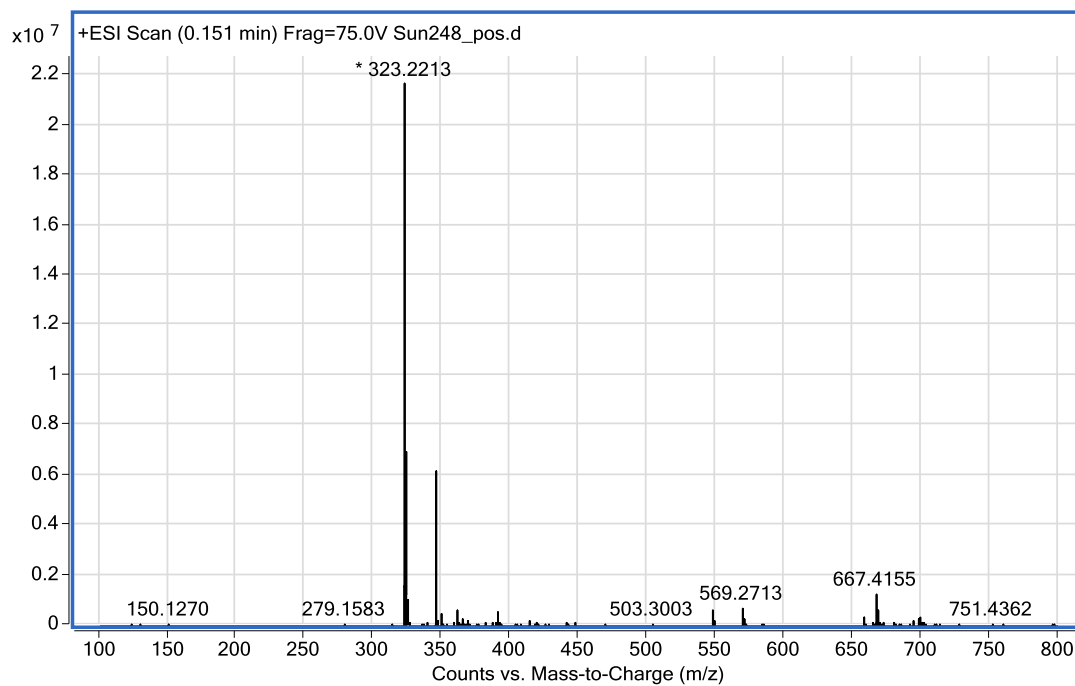

$^1\text{H}$  and  $^{13}\text{C}$  NMR spectra of **2f**

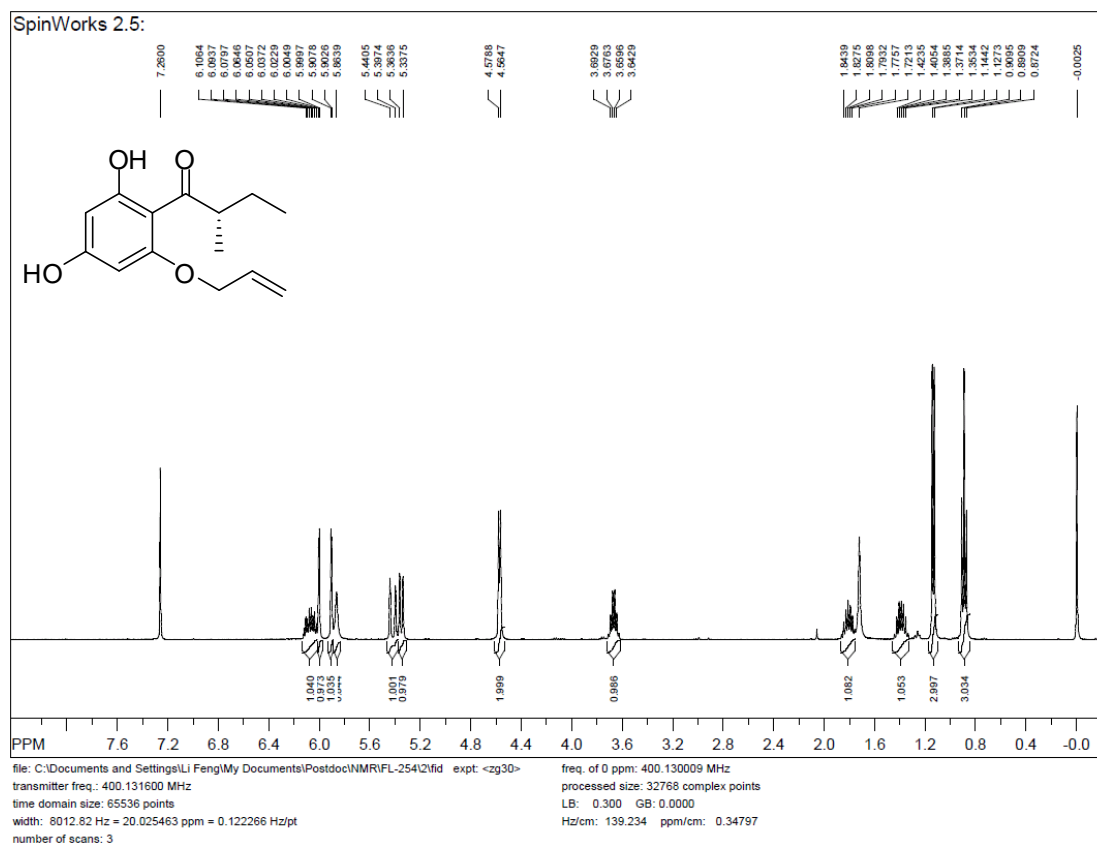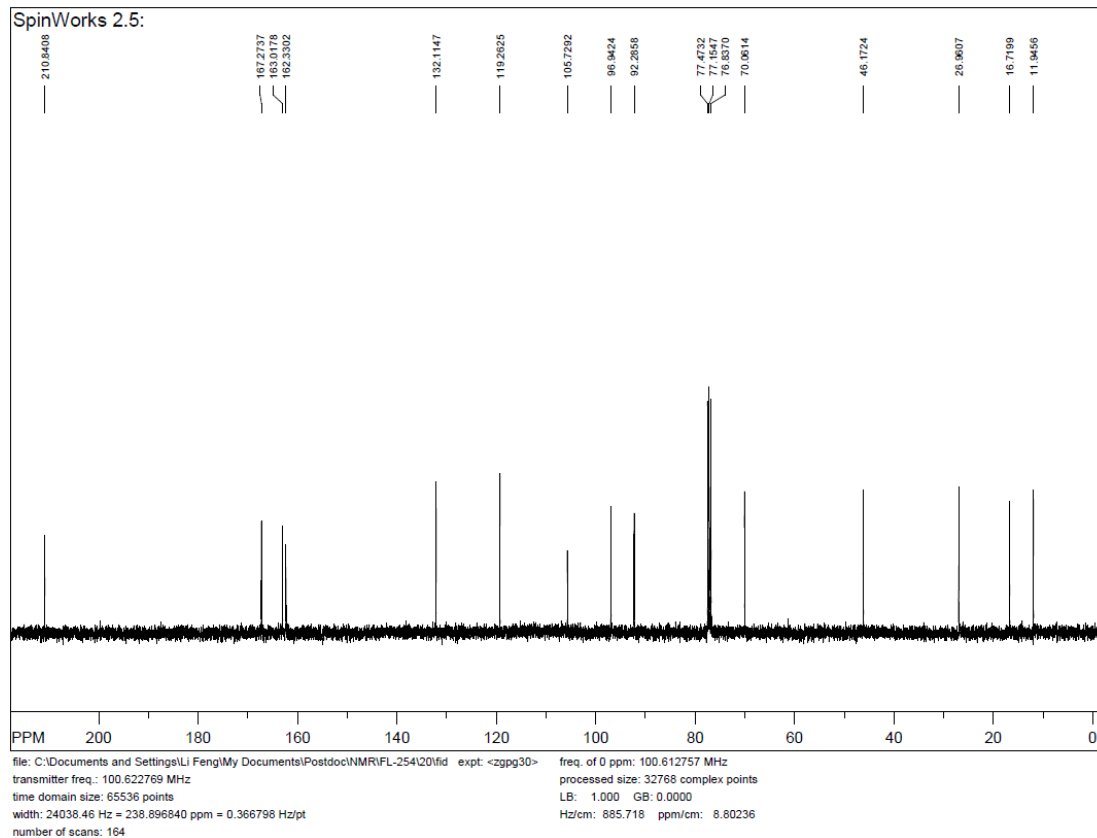

HPLC profile of **2f**

==== Shimadzu LCsolution Analysis Report ====

C:\LabSolutions\LCsolution\Sun\Feng\FL-254-P.lcd

Sample Name : FL-254-P  
 Tray# : 1  
 Vail # : 91  
 Injection Volume : 8 uL  
 Data File Name : FL-254-P.lcd  
 Method File Name : SDQ gradient.lcm  
 Batch File Name :  
 Data Acquired : 6/12/2012 12:12:11 PM

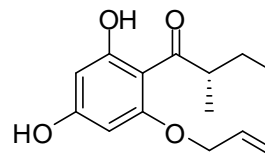

<Chromatogram>

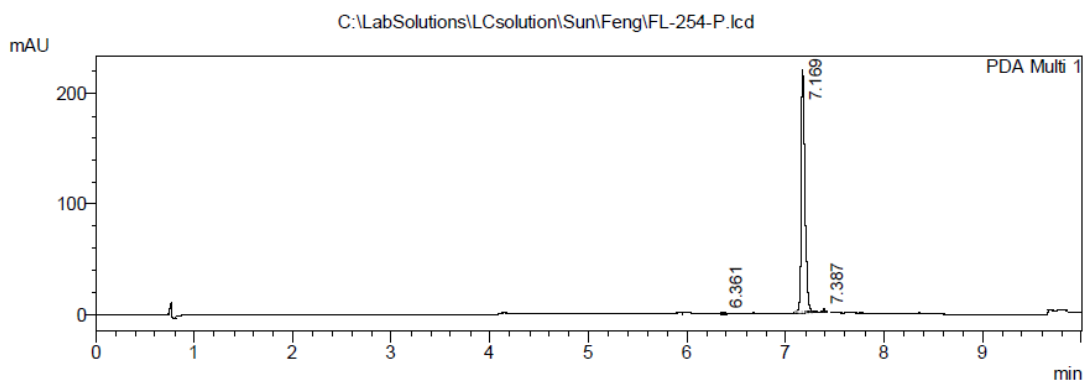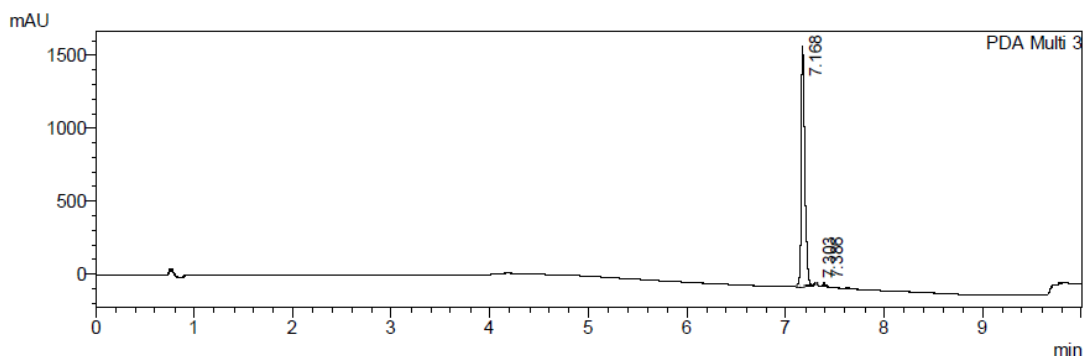

- 1 PDA Multi 1/254nm 4nm
- 2 PDA Multi 3/220nm 4nm

PeakTable

PDA Ch1 254nm 4nm

| Peak# | Ret. Time | Area   | Height | Area %  | Height % |
|-------|-----------|--------|--------|---------|----------|
| 1     | 6.361     | 1183   | 561    | 0.189   | 0.258    |
| 2     | 7.169     | 619052 | 214840 | 99.147  | 98.852   |
| 3     | 7.387     | 4143   | 1934   | 0.664   | 0.890    |
| Total |           | 624378 | 217334 | 100.000 | 100.000  |

PeakTable

PDA Ch3 220nm 4nm

| Peak# | Ret. Time | Area    | Height  | Area %  | Height % |
|-------|-----------|---------|---------|---------|----------|
| 1     | 7.168     | 4451986 | 1645227 | 99.570  | 99.200   |
| 2     | 7.303     | 4346    | 3180    | 0.097   | 0.192    |
| 3     | 7.386     | 14859   | 10088   | 0.332   | 0.608    |
| Total |           | 4471191 | 1658495 | 100.000 | 100.000  |

# HRMS of 2f

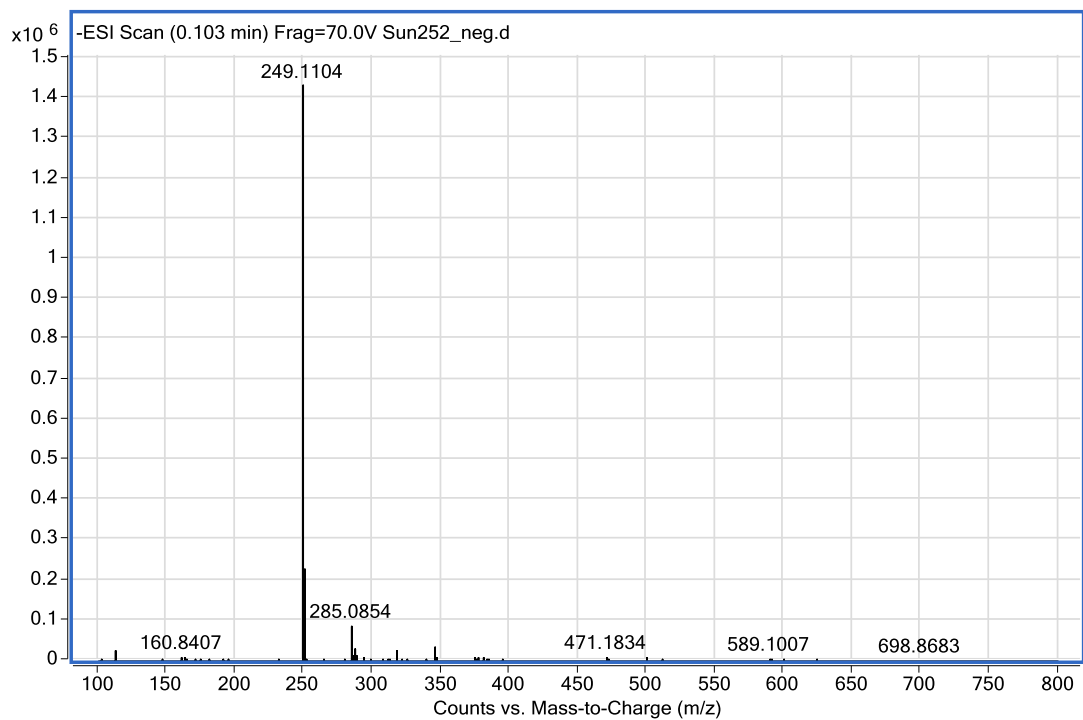

<sup>1</sup>H and <sup>13</sup>C NMR spectra of **3a**

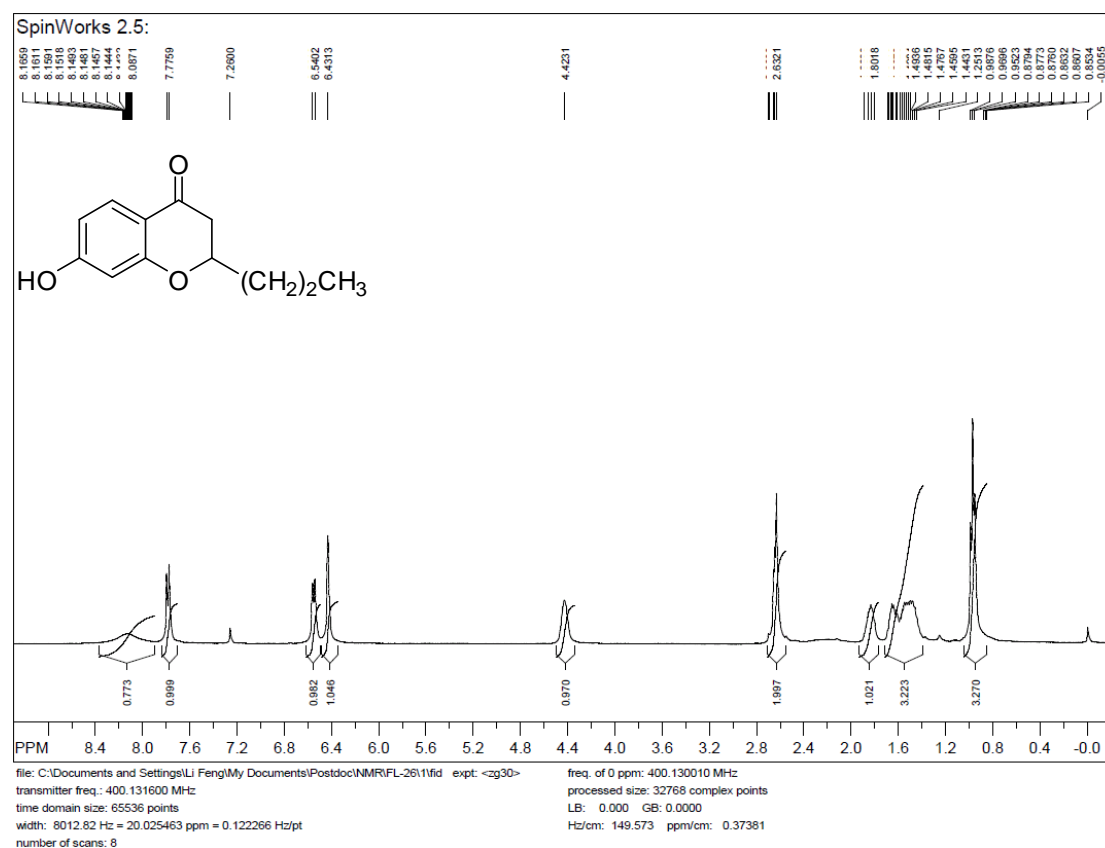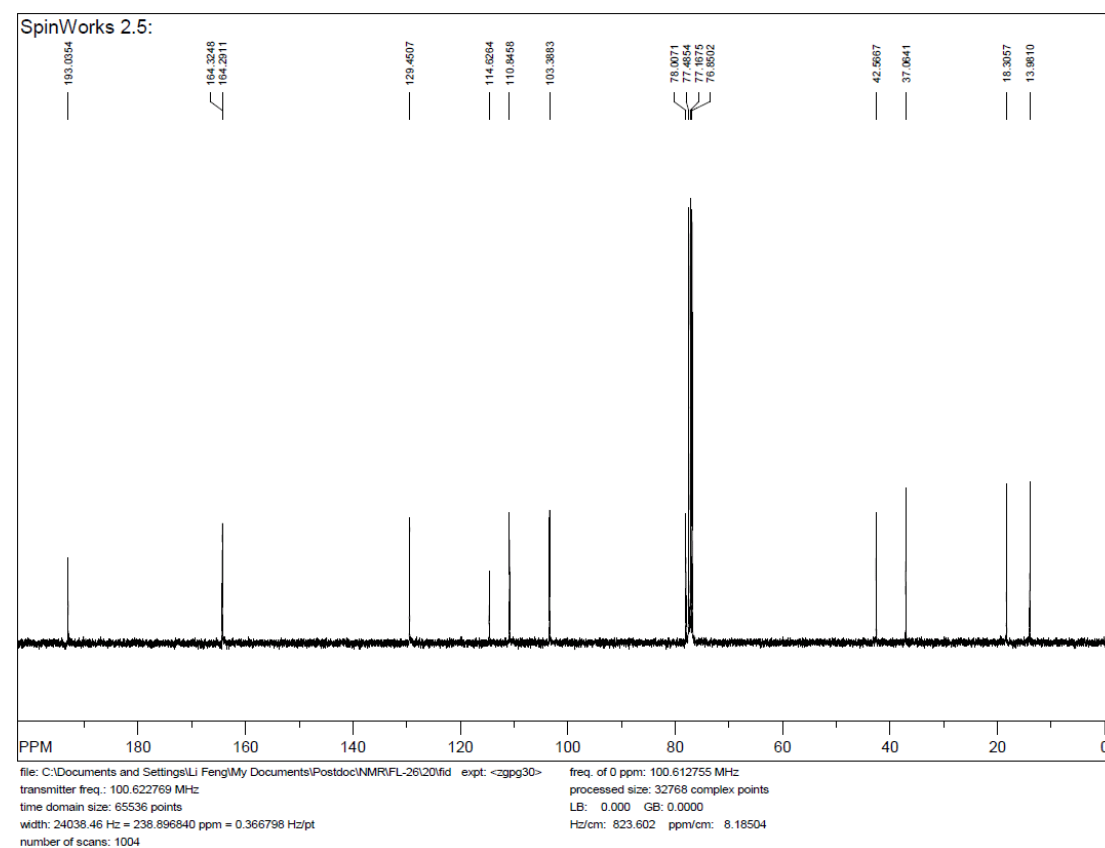

HPLC profile of 3a

==== Shimadzu LCsolution Analysis Report ====

Sample Name : FL-26-P  
 Tray# : 1  
 Vial # : 93  
 Injection Volume : 5 uL  
 Data File Name : FL-26-P.lcd  
 Method File Name : SDQ gradient.lcm  
 Batch File Name : Batch 1.lcb  
 Data Acquired : 12/2/2011 11:40:37 AM

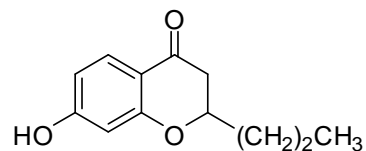

<Chromatogram>

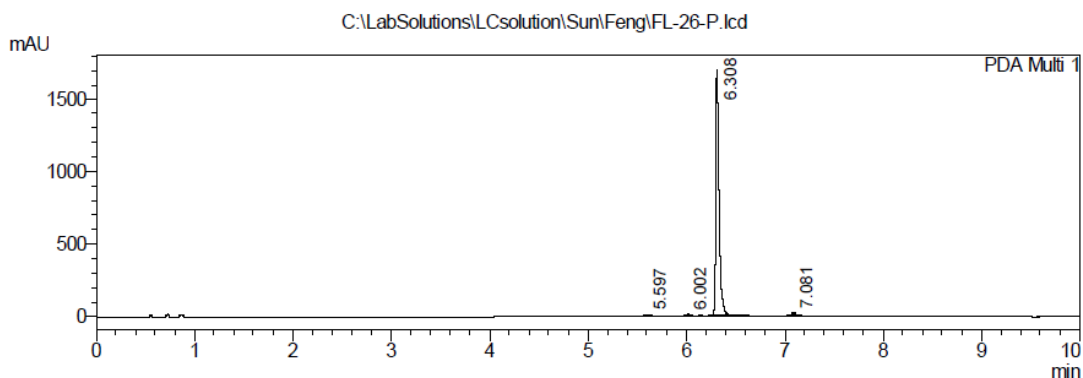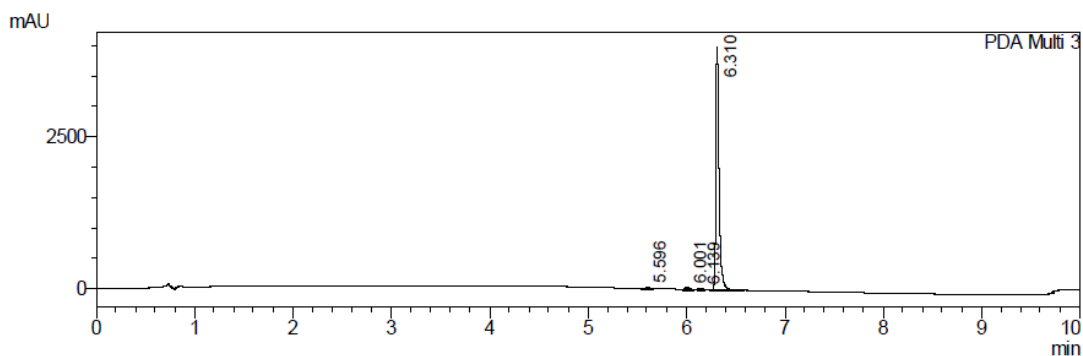

- 1 PDA Multi 1/254nm 4nm
- 2 PDA Multi 3/220nm 4nm

PeakTable

PDA Ch1 254nm 4nm

| Peak# | Ret. Time | Area    | Height  | Area %  | Height % |
|-------|-----------|---------|---------|---------|----------|
| 1     | 5.597     | 19719   | 9009    | 0.448   | 0.516    |
| 2     | 6.002     | 36266   | 15648   | 0.825   | 0.896    |
| 3     | 6.308     | 4280075 | 1695387 | 97.328  | 97.133   |
| 4     | 7.081     | 61502   | 25380   | 1.399   | 1.454    |
| Total |           | 4397562 | 1745423 | 100.000 | 100.000  |

PeakTable

PDA Ch3 220nm 4nm

| Peak# | Ret. Time | Area     | Height  | Area %  | Height % |
|-------|-----------|----------|---------|---------|----------|
| 1     | 5.596     | 42874    | 17638   | 0.426   | 0.434    |
| 2     | 6.001     | 70281    | 30111   | 0.698   | 0.741    |
| 3     | 6.139     | 30787    | 16697   | 0.306   | 0.411    |
| 4     | 6.310     | 9926608  | 4000820 | 98.571  | 98.415   |
| Total |           | 10070551 | 4065266 | 100.000 | 100.000  |

### HRMS of 3a

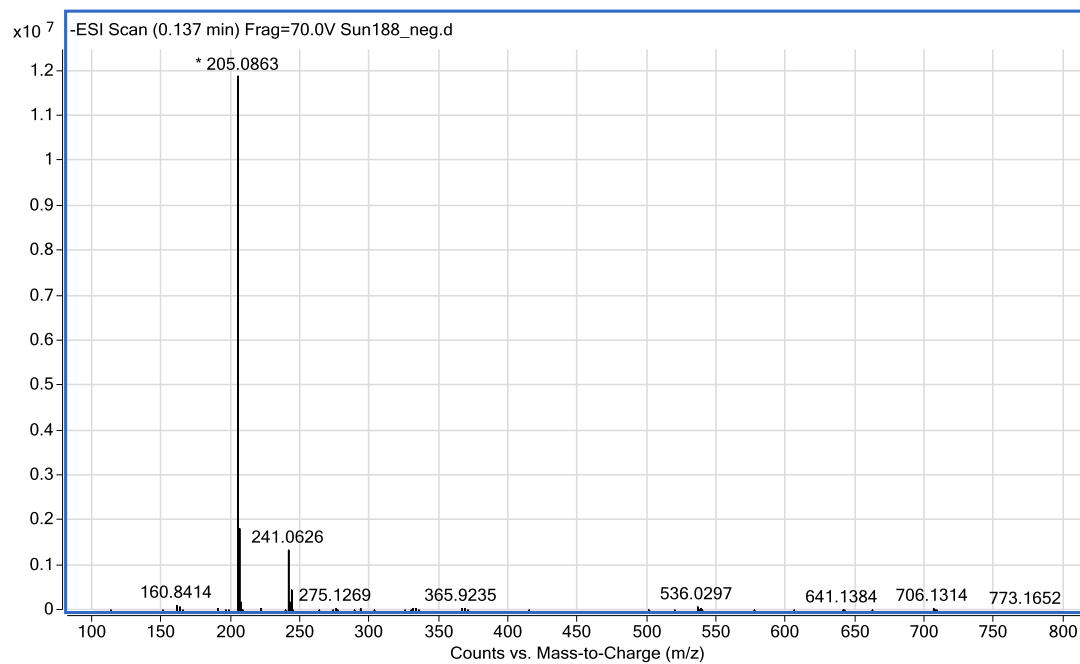

<sup>1</sup>H and <sup>13</sup>C NMR spectra of **3b**

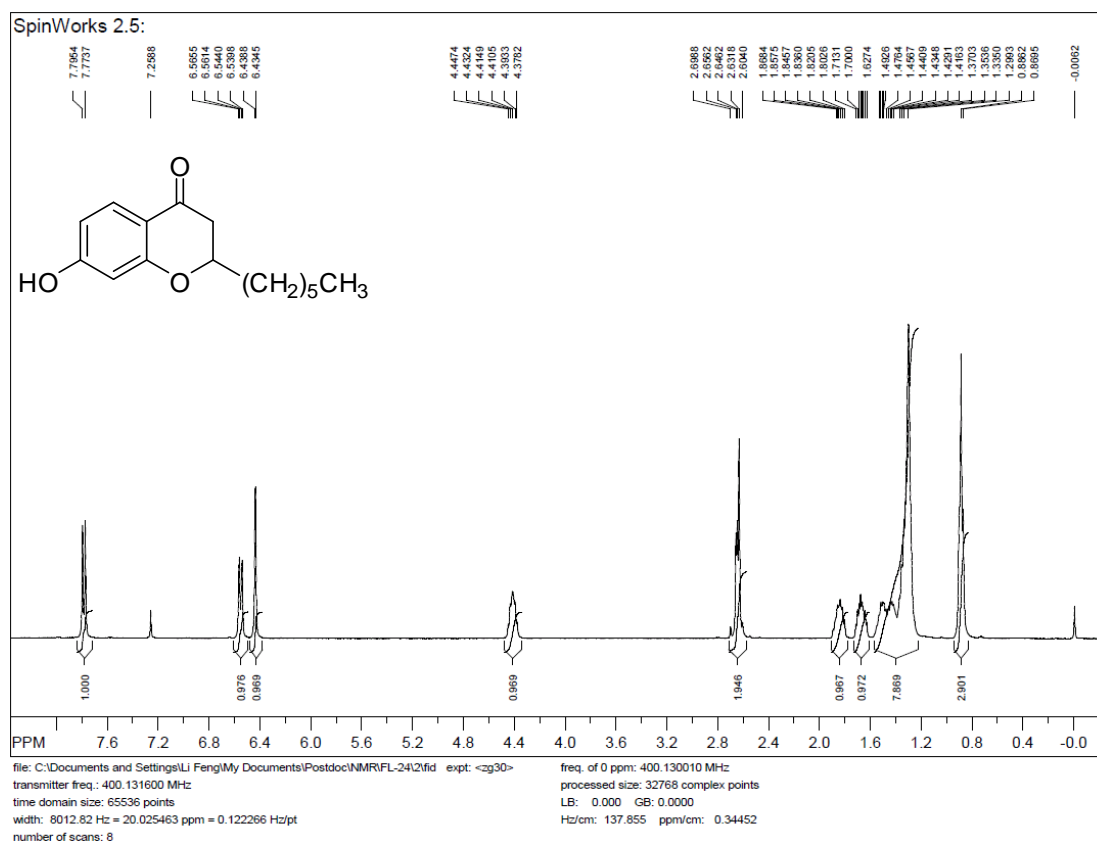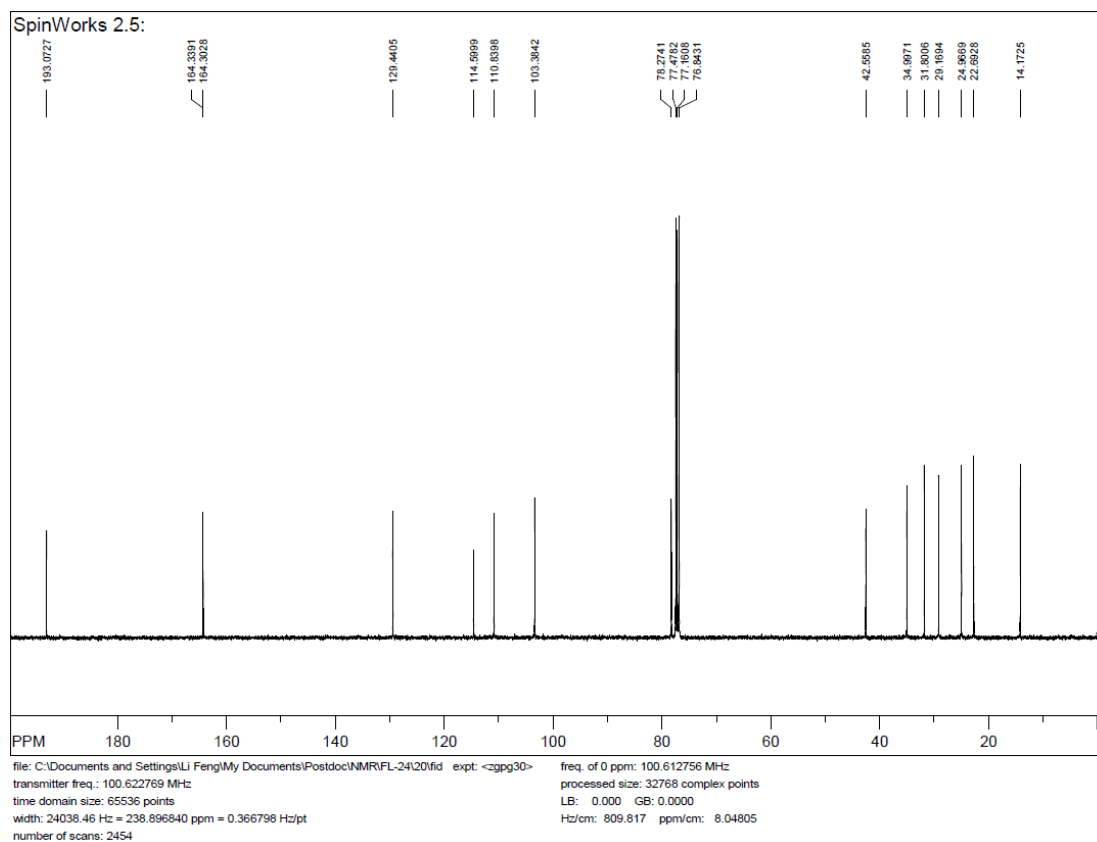



HPLC profile of 3b

==== Shimadzu LCsolution Analysis Report ====

Sample Name : FL-33-P  
 Tray# : 1  
 Vial # : 94  
 Injection Volume : 5 uL  
 Data File Name : FL-33-P.lcd  
 Method File Name : SDQ gradient.lcm  
 Batch File Name : Batch 1.lcb  
 Data Acquired : 12/2/2011 11:51:06 AM

C:\LabSolutions\LCsolution\Sun\Feng\FL-33-P.lcd

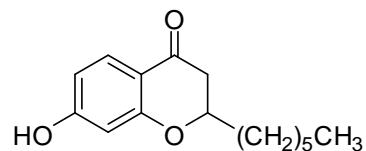

<Chromatogram>

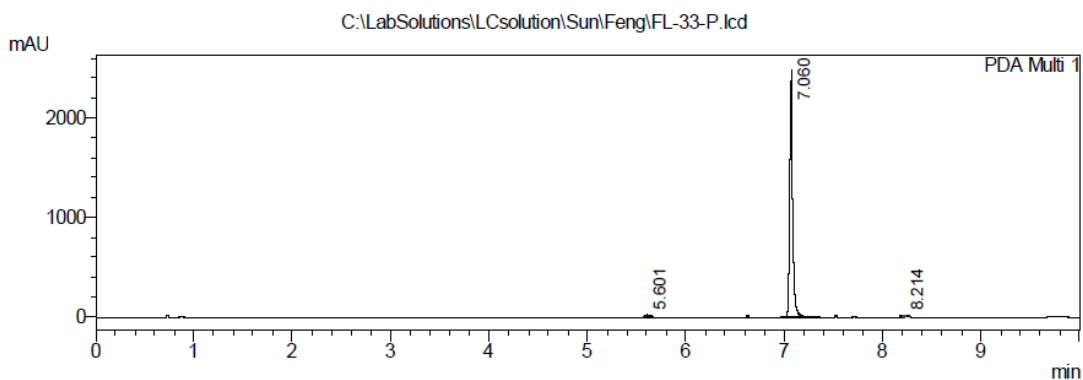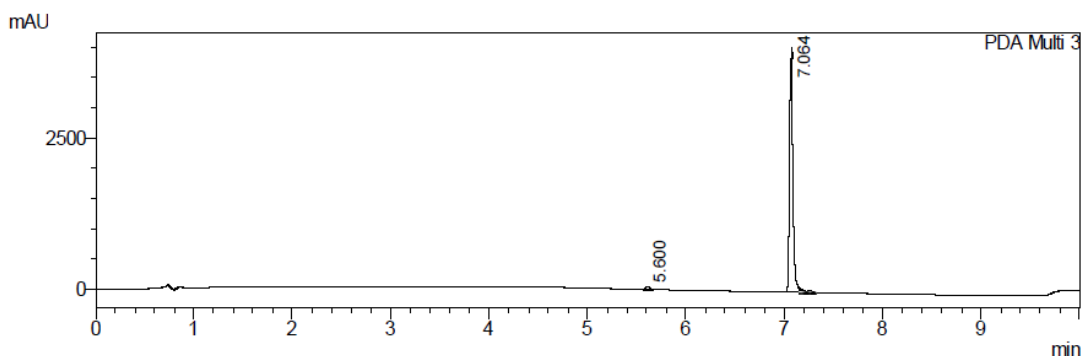

- 1 PDA Multi 1/254nm 4nm
- 2 PDA Multi 3/220nm 4nm

PeakTable

PDA Ch1 254nm 4nm

| Peak# | Ret. Time | Area    | Height  | Area %  | Height % |
|-------|-----------|---------|---------|---------|----------|
| 1     | 5.601     | 59260   | 24157   | 0.995   | 0.962    |
| 2     | 7.060     | 5860048 | 2472339 | 98.422  | 98.414   |
| 3     | 8.214     | 34698   | 15694   | 0.583   | 0.625    |
| Total |           | 5954005 | 2512190 | 100.000 | 100.000  |

PeakTable

PDA Ch3 220nm 4nm

| Peak# | Ret. Time | Area     | Height  | Area %  | Height % |
|-------|-----------|----------|---------|---------|----------|
| 1     | 5.600     | 105419   | 44395   | 0.940   | 1.088    |
| 2     | 7.064     | 11111850 | 4036335 | 99.060  | 98.912   |
| Total |           | 11217269 | 4080730 | 100.000 | 100.000  |

### HRMS of 3b

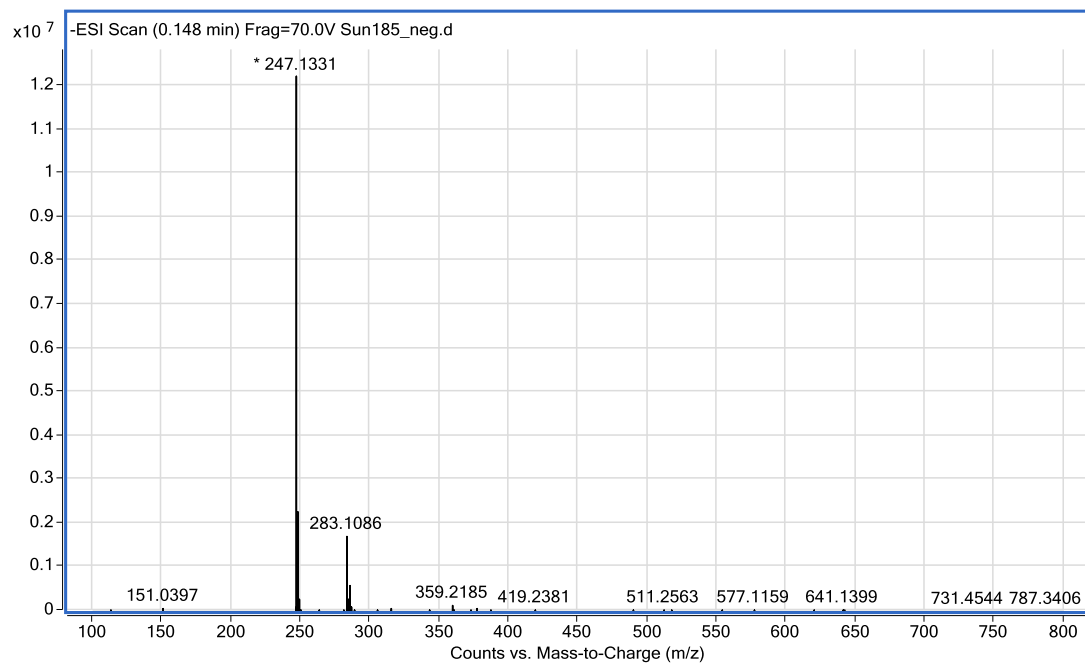

<sup>1</sup>H and <sup>13</sup>C NMR spectra of **3c**

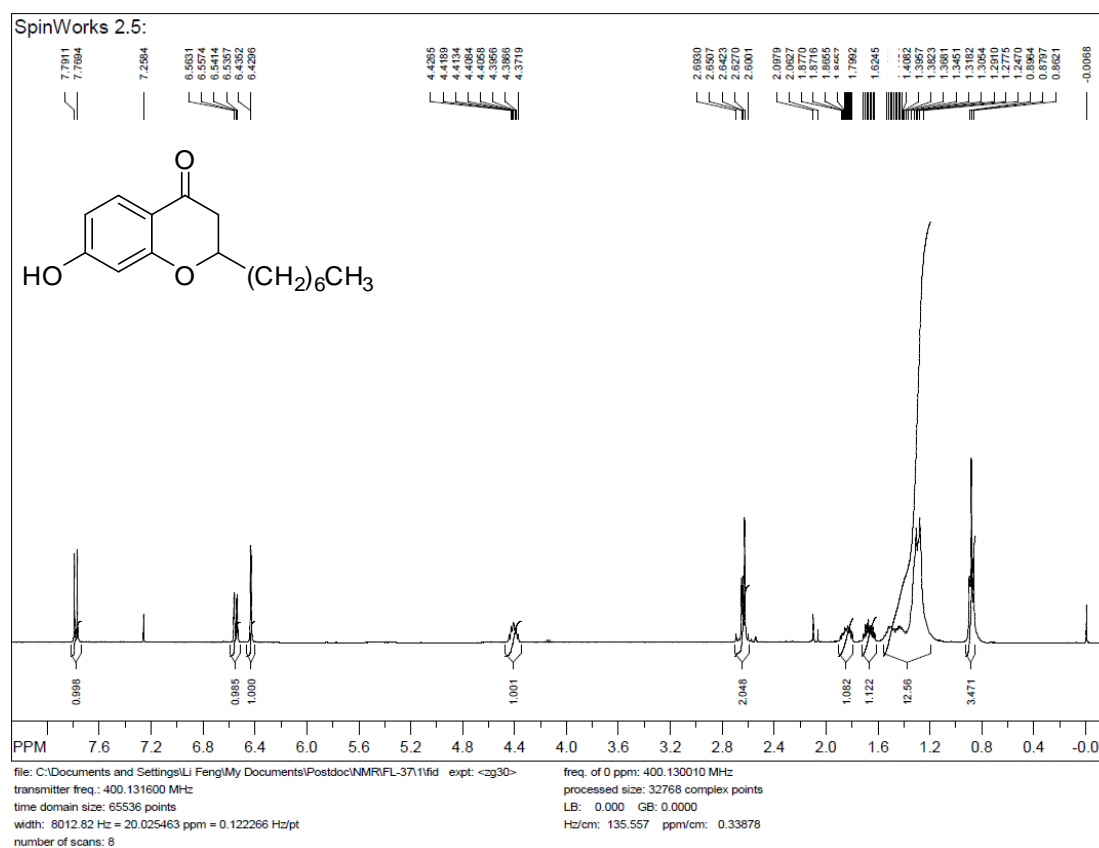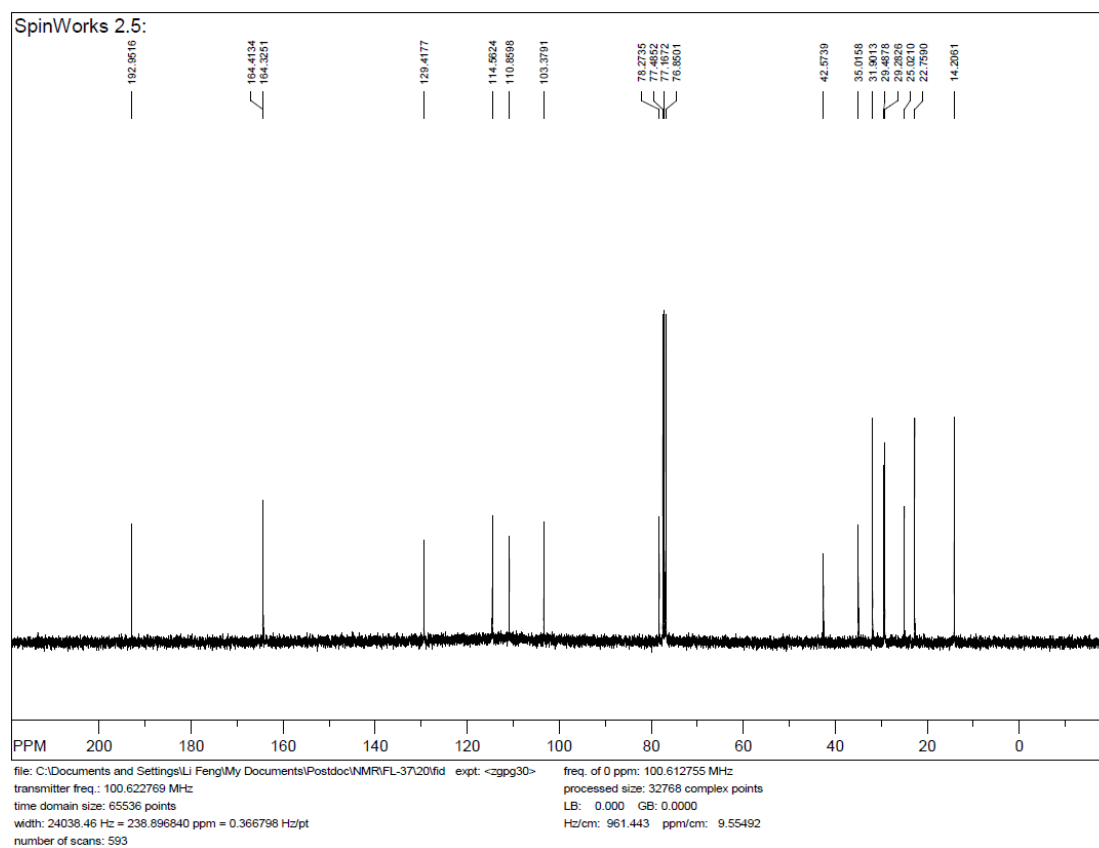

HPLC profile of 3c

==== Shimadzu LCsolution Analysis Report ====

Sample Name : FL-37-P  
 Tray# : 1  
 Vial # : 91  
 Injection Volume : 5 uL  
 Data File Name : FL-37-P.lcd  
 Method File Name : SDQ gradient.lcm  
 Batch File Name :  
 Data Acquired : 12/2/2011 12:58:42 PM

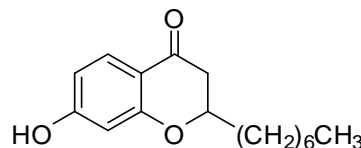

<Chromatogram>

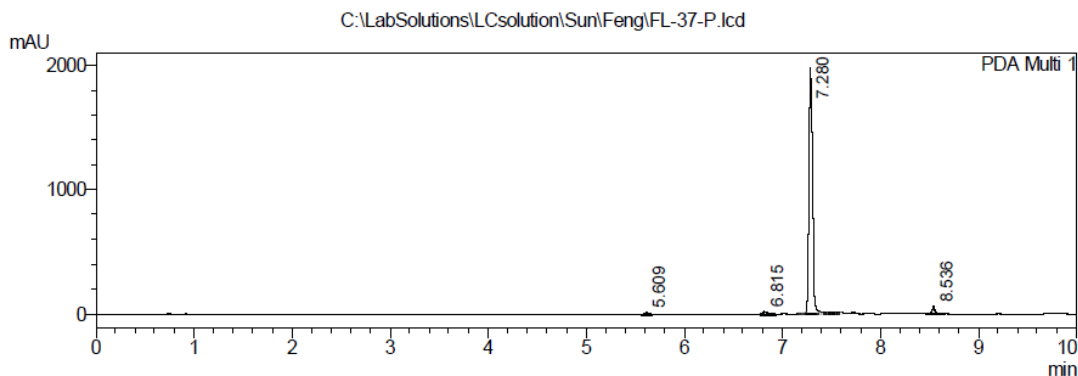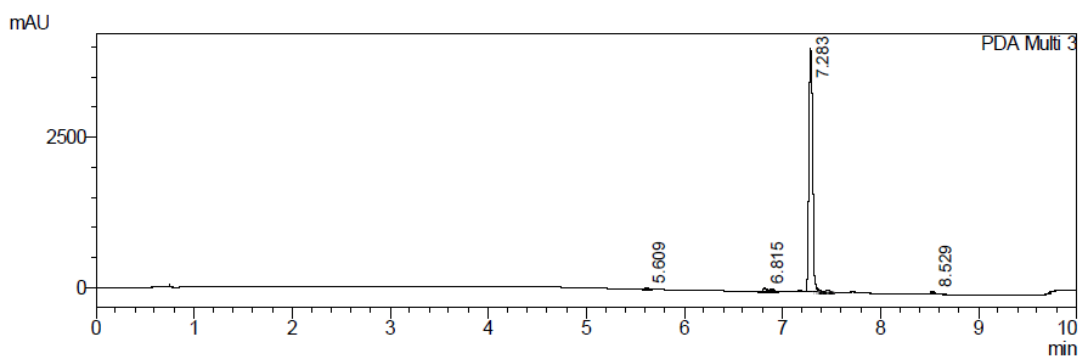

- 1 PDA Multi 1/254nm 4nm
- 2 PDA Multi 3/220nm 4nm

PeakTable

PDA Ch1 254nm 4nm

| Peak# | Ret. Time | Area    | Height  | Area %  | Height % |
|-------|-----------|---------|---------|---------|----------|
| 1     | 5.609     | 29157   | 12173   | 0.598   | 0.613    |
| 2     | 6.815     | 58390   | 18377   | 1.197   | 0.926    |
| 3     | 7.280     | 4634568 | 1896096 | 94.985  | 95.496   |
| 4     | 8.536     | 157136  | 58876   | 3.220   | 2.965    |
| Total |           | 4879251 | 1985523 | 100.000 | 100.000  |

PeakTable

PDA Ch3 220nm 4nm

| Peak# | Ret. Time | Area     | Height  | Area %  | Height % |
|-------|-----------|----------|---------|---------|----------|
| 1     | 5.609     | 51553    | 22300   | 0.482   | 0.537    |
| 2     | 6.815     | 226513   | 50722   | 2.118   | 1.220    |
| 3     | 7.283     | 10280614 | 4044804 | 96.138  | 97.327   |
| 4     | 8.529     | 134933   | 38045   | 1.262   | 0.915    |
| Total |           | 10693613 | 4155871 | 100.000 | 100.000  |

### HRMS of 3c

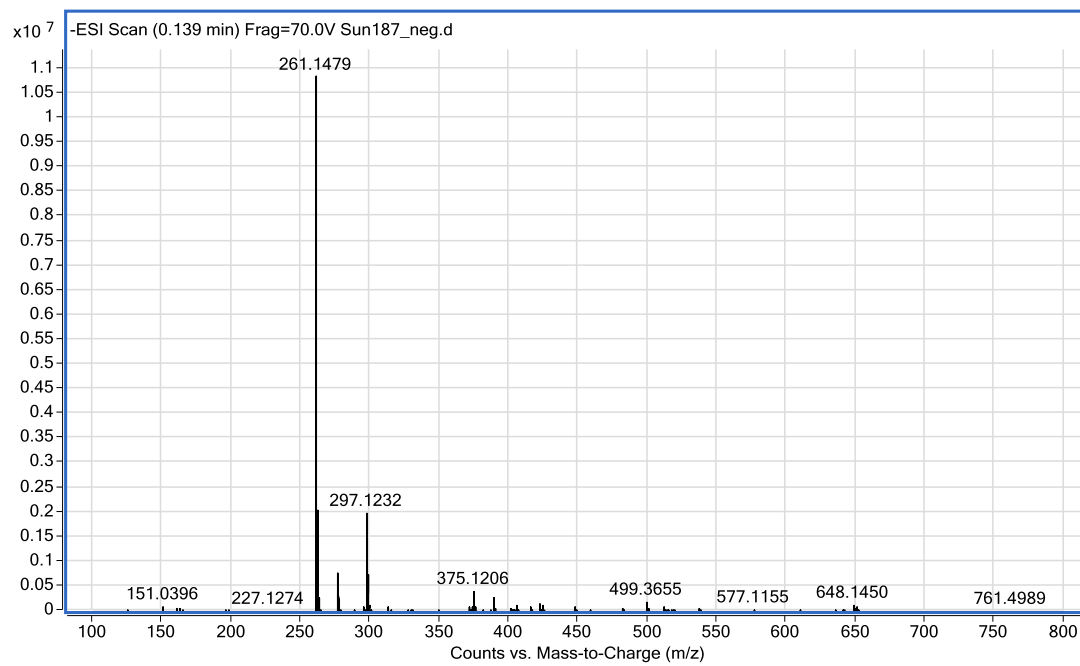

<sup>1</sup>H and <sup>13</sup>C NMR spectra of **3d**

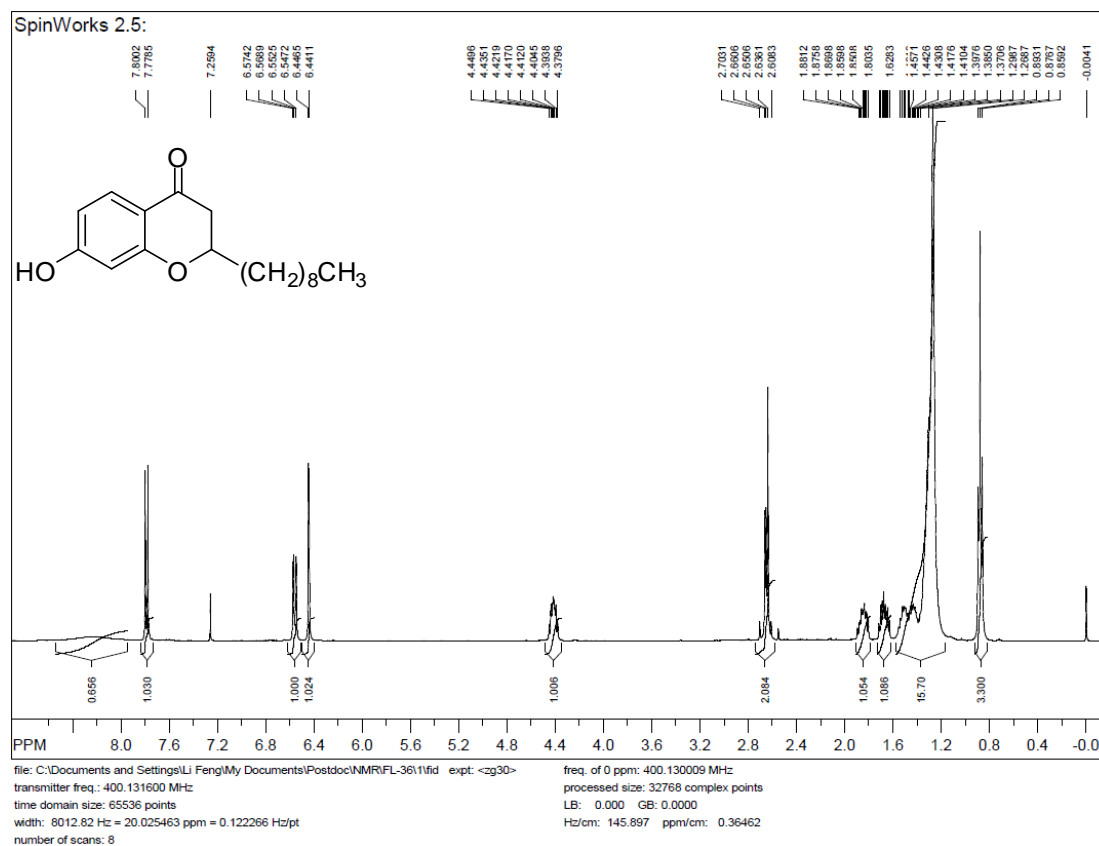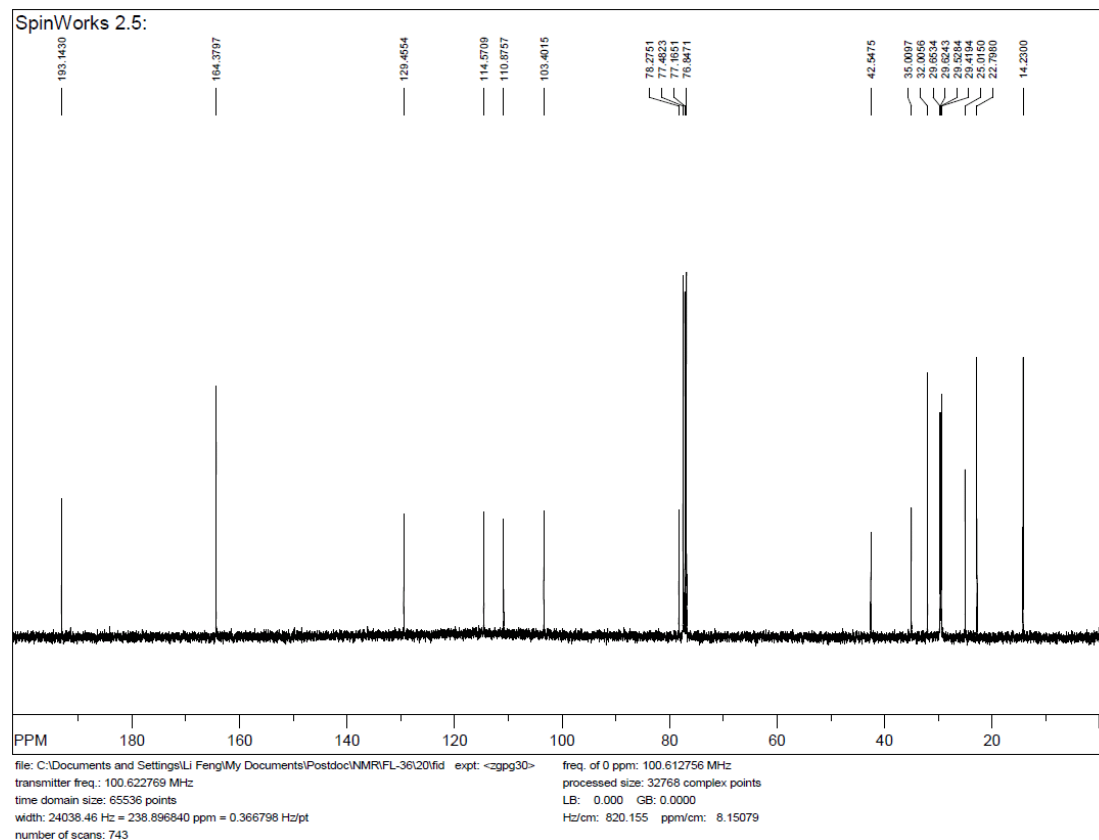

HPLC profile of 3d

==== Shimadzu LCsolution Analysis Report ====

Sample Name : FL-36-P  
 Tray# : 1  
 Vial # : 91  
 Injection Volume : 5 uL  
 Data File Name : FL-36-P.lcd  
 Method File Name : SDQ gradient.lcm  
 Batch File Name :  
 Data Acquired : 12/2/2011 12:03:09 PM

C:\LabSolutions\LCsolution\Sun\Feng\FL-36-P.lcd

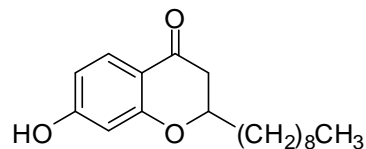

<Chromatogram>

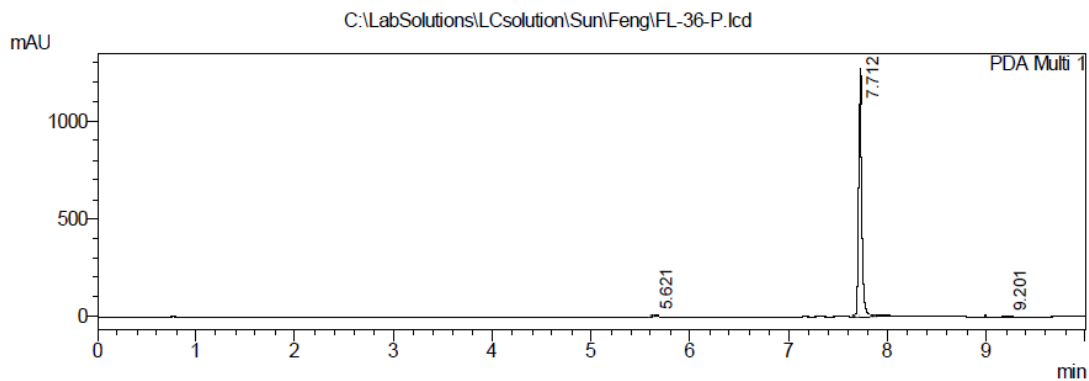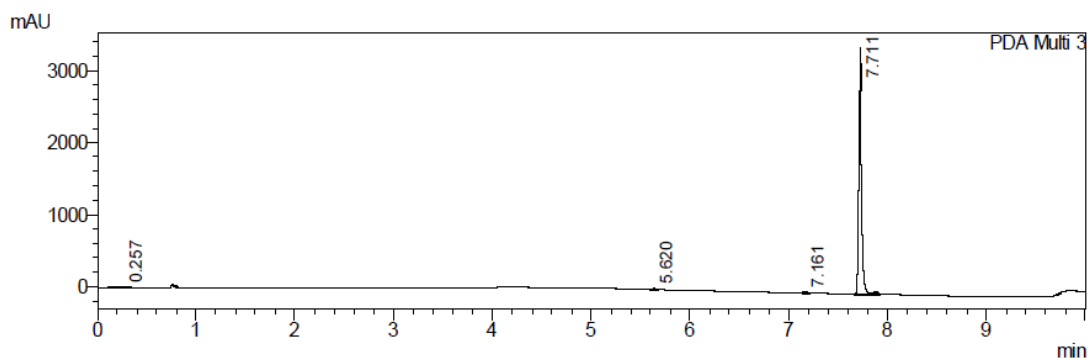

- 1 PDA Multi 1/254nm 4nm
- 2 PDA Multi 3/220nm 4nm

PeakTable

PDA Ch1 254nm 4nm

| Peak# | Ret. Time | Area    | Height  | Area %  | Height % |
|-------|-----------|---------|---------|---------|----------|
| 1     | 5.621     | 16504   | 7168    | 0.513   | 0.582    |
| 2     | 7.712     | 3191912 | 1220214 | 99.149  | 99.100   |
| 3     | 9.201     | 10889   | 3915    | 0.338   | 0.318    |
| Total |           | 3219305 | 1231297 | 100.000 | 100.000  |

PeakTable

PDA Ch3 220nm 4nm

| Peak# | Ret. Time | Area    | Height  | Area %  | Height % |
|-------|-----------|---------|---------|---------|----------|
| 1     | 0.257     | 2074    | 255     | 0.028   | 0.007    |
| 2     | 5.620     | 29178   | 12902   | 0.390   | 0.375    |
| 3     | 7.161     | 23350   | 10158   | 0.312   | 0.295    |
| 4     | 7.711     | 7422250 | 3420679 | 99.270  | 99.323   |
| Total |           | 7476852 | 3443994 | 100.000 | 100.000  |

### HRMS of 3d

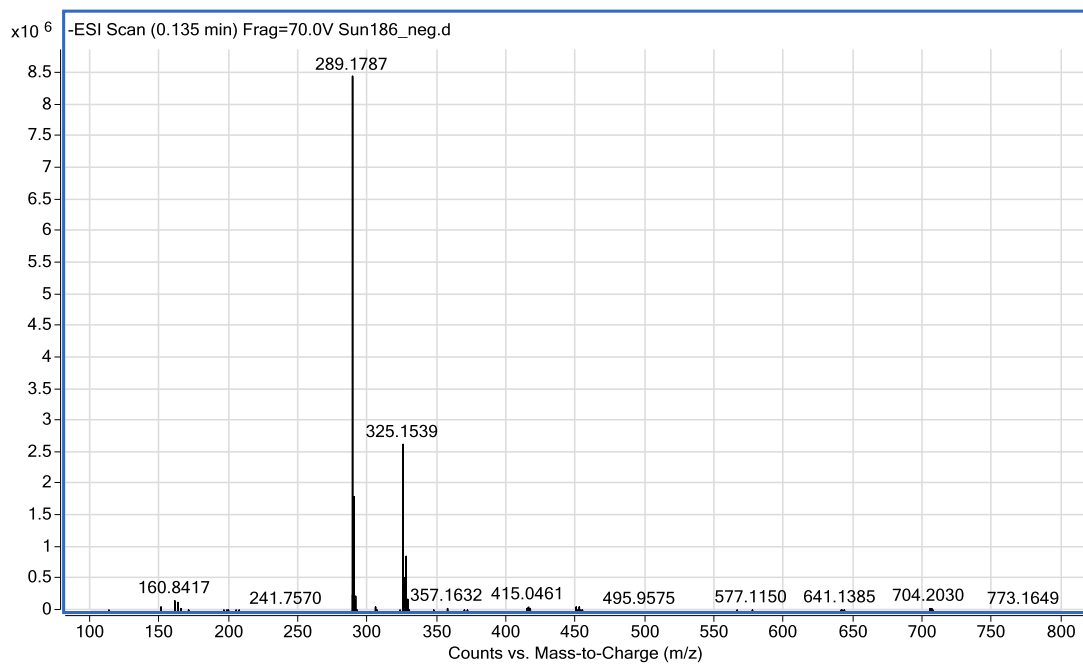



$^1\text{H}$  and  $^{13}\text{C}$  NMR spectra of **3e**

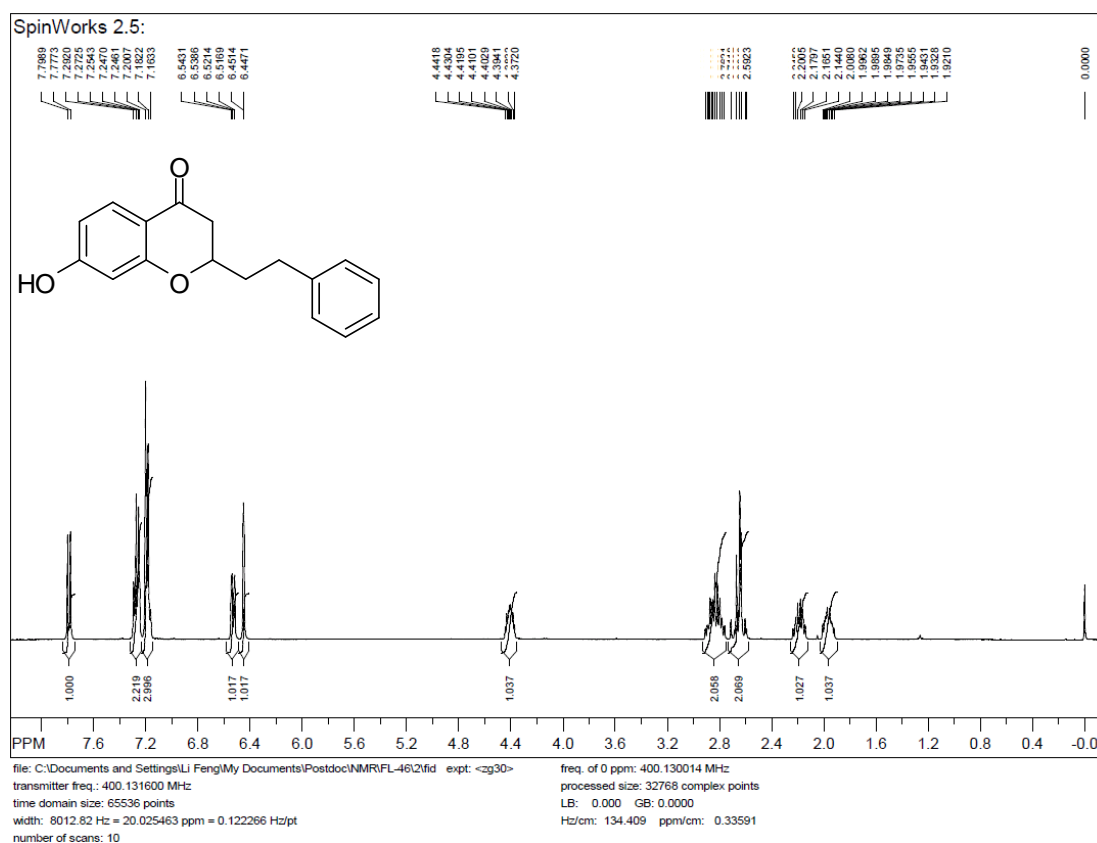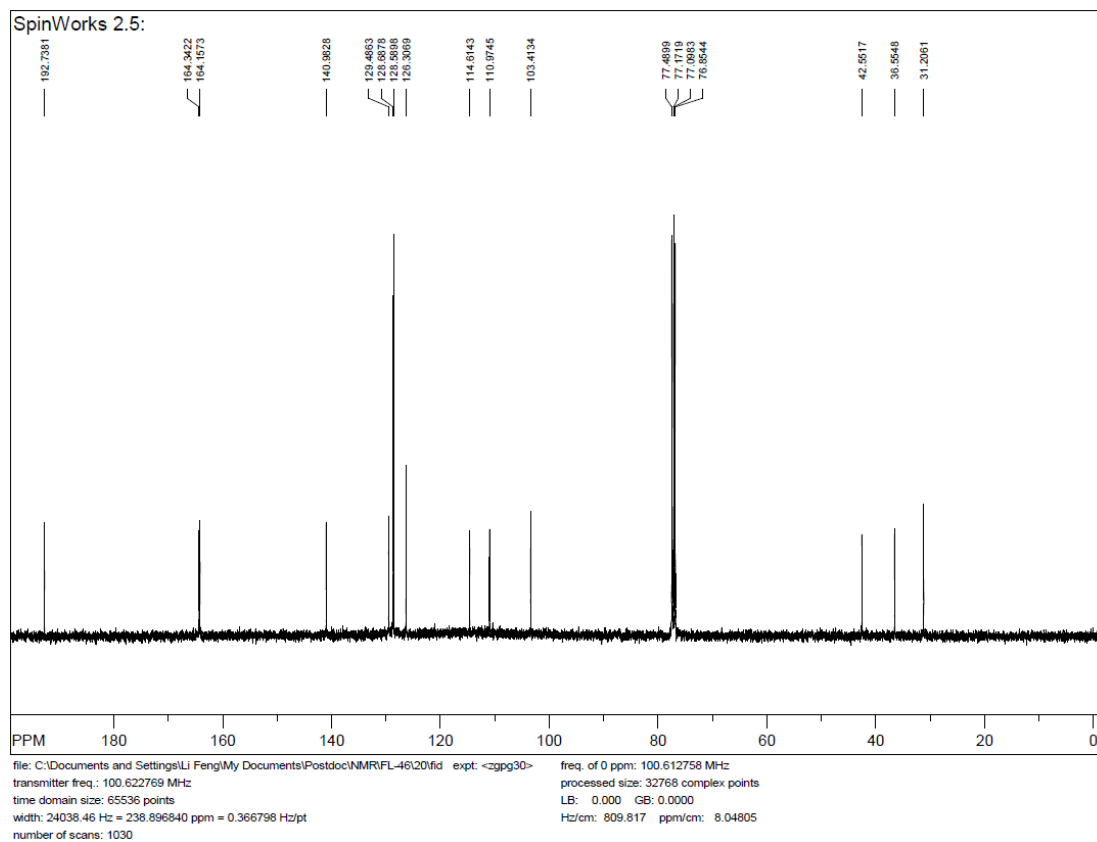

HPLC profile of 3e

==== Shimadzu LCsolution Analysis Report ====

Sample Name : FL-46-P  
 Tray# : 1  
 Vail # : 91  
 Injection Volume : 5 uL  
 Data File Name : FL-46-P.lcd  
 Method File Name : SDQ gradient.lcm  
 Batch File Name : Batch 1.lcb  
 Data Acquired : 12/2/2011 1:35:47 PM

C:\LabSolutions\LCsolution\Sun\Feng\FL-46-P.lcd

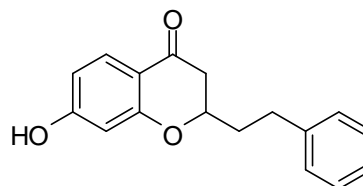

<Chromatogram>

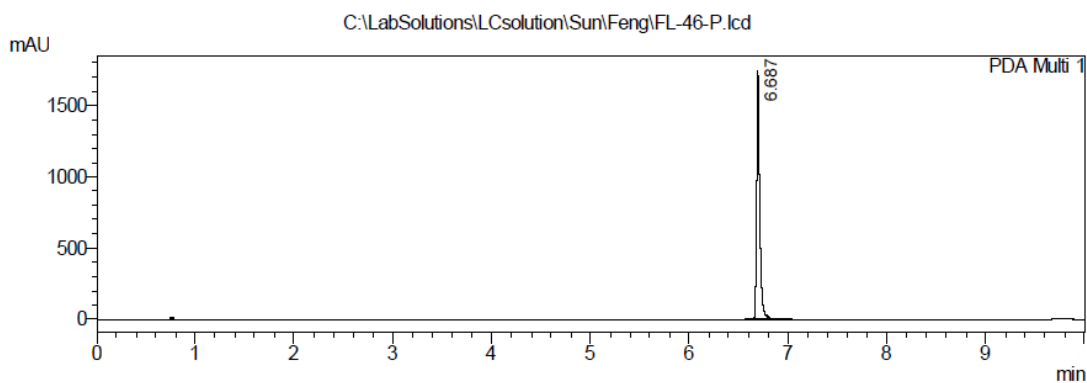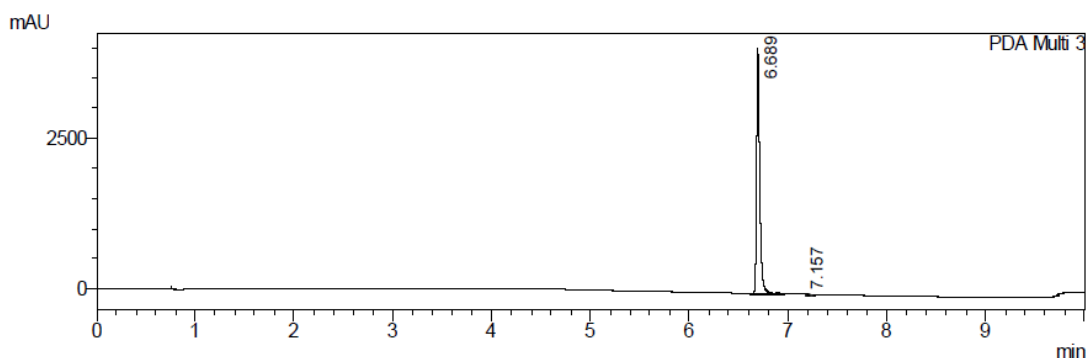

- 1 PDA Multi 1/254nm 4nm
- 2 PDA Multi 3/220nm 4nm

PeakTable

PDA Ch1 254nm 4nm

| Peak# | Ret. Time | Area    | Height  | Area %  | Height % |
|-------|-----------|---------|---------|---------|----------|
| 1     | 6.687     | 4335892 | 1710572 | 100.000 | 100.000  |
| Total |           | 4335892 | 1710572 | 100.000 | 100.000  |

PeakTable

PDA Ch3 220nm 4nm

| Peak# | Ret. Time | Area     | Height  | Area %  | Height % |
|-------|-----------|----------|---------|---------|----------|
| 1     | 6.689     | 10422186 | 4069912 | 99.500  | 99.614   |
| 2     | 7.157     | 52372    | 15764   | 0.500   | 0.386    |
| Total |           | 10474558 | 4085676 | 100.000 | 100.000  |

### HRMS of 3e

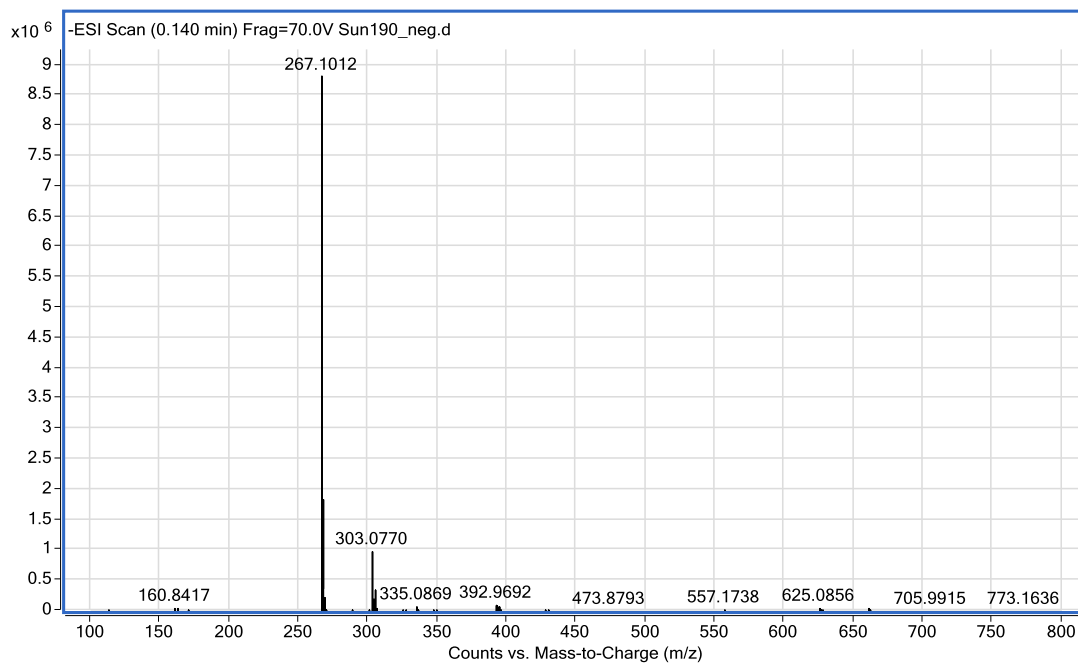

<sup>1</sup>H and <sup>13</sup>C NMR spectra of **3f**

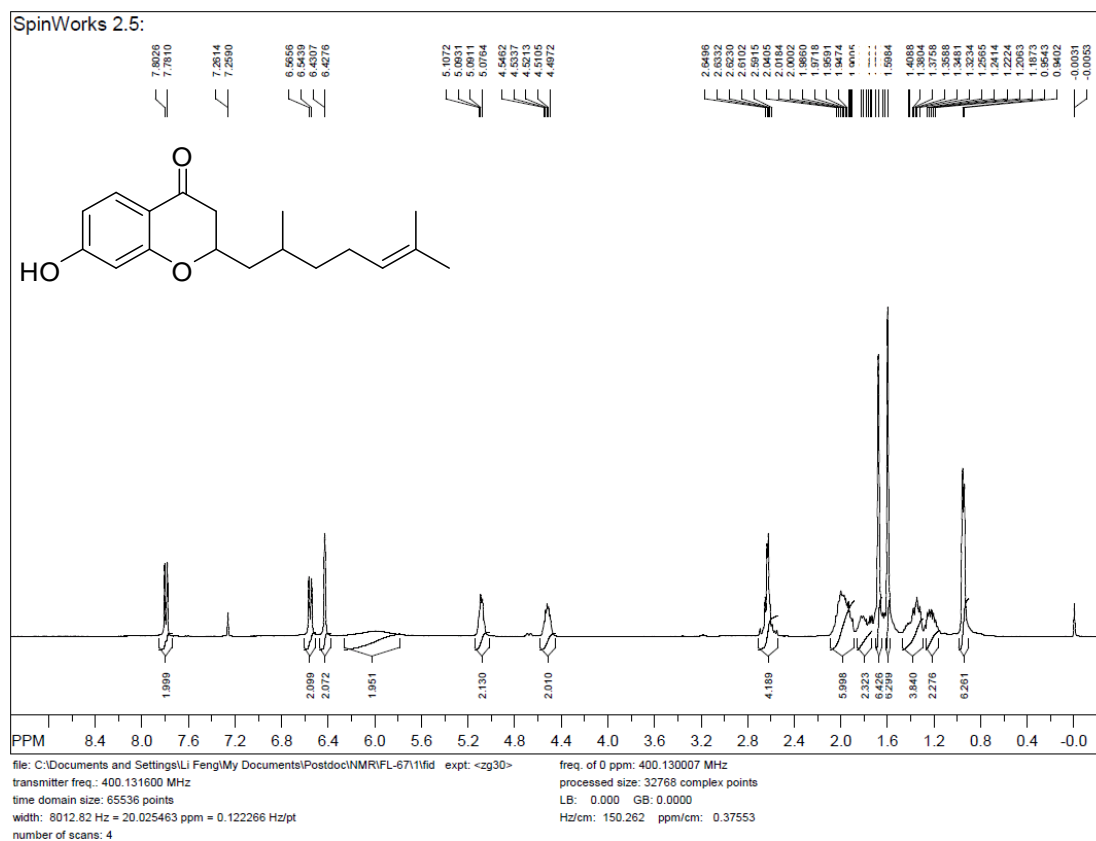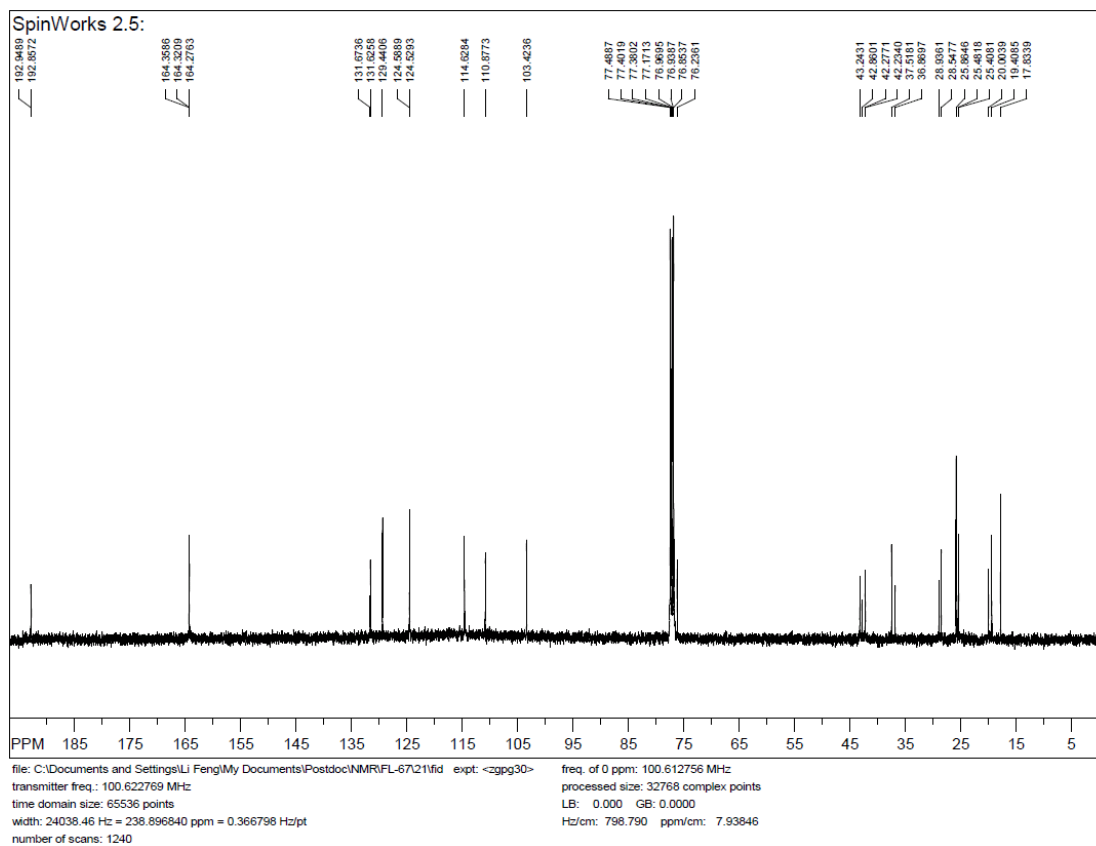

HPLC profile of 3f

### ==== Shimadzu LCsolution Analysis Report ====

Sample Name : FL-67-P  
 Tray# : 1  
 Vial # : 91  
 Injection Volume : 3 uL  
 Data File Name : FL-67-P.lcd  
 Method File Name : SDQ gradient.lcm  
 Batch File Name :  
 Data Acquired : 11/28/2011 5:12:41 PM

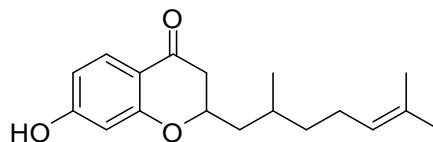

<Chromatogram>

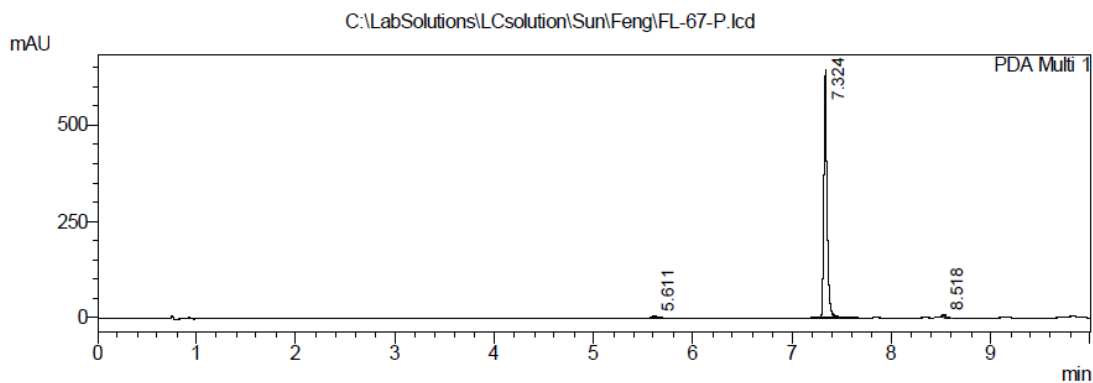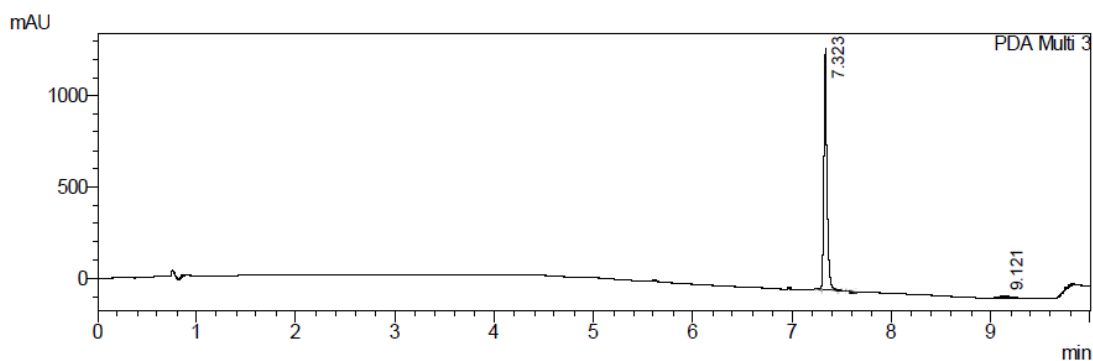

- 1 PDA Multi 1/254nm 4nm
- 2 PDA Multi 3/220nm 4nm

PeakTable

PDA Ch1 254nm 4nm

| Peak# | Ret. Time | Area    | Height | Area %  | Height % |
|-------|-----------|---------|--------|---------|----------|
| 1     | 5.611     | 14238   | 5819   | 0.838   | 0.889    |
| 2     | 7.324     | 1660986 | 640346 | 97.755  | 97.837   |
| 3     | 8.518     | 23900   | 8340   | 1.407   | 1.274    |
| Total |           | 1699124 | 654505 | 100.000 | 100.000  |

PeakTable

PDA Ch3 220nm 4nm

| Peak# | Ret. Time | Area    | Height  | Area %  | Height % |
|-------|-----------|---------|---------|---------|----------|
| 1     | 7.323     | 3281170 | 1325083 | 97.953  | 99.278   |
| 2     | 9.121     | 68574   | 9637    | 2.047   | 0.722    |
| Total |           | 3349744 | 1334720 | 100.000 | 100.000  |

# HRMS of 3f

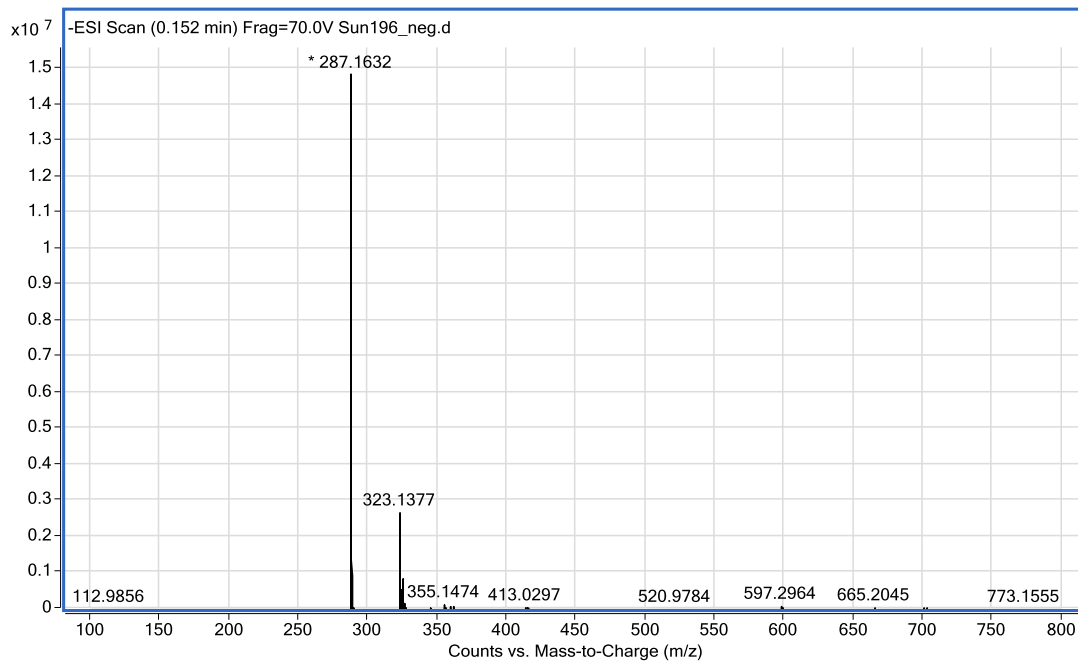

$^1\text{H}$  and  $^{13}\text{C}$  NMR spectra of **3k**

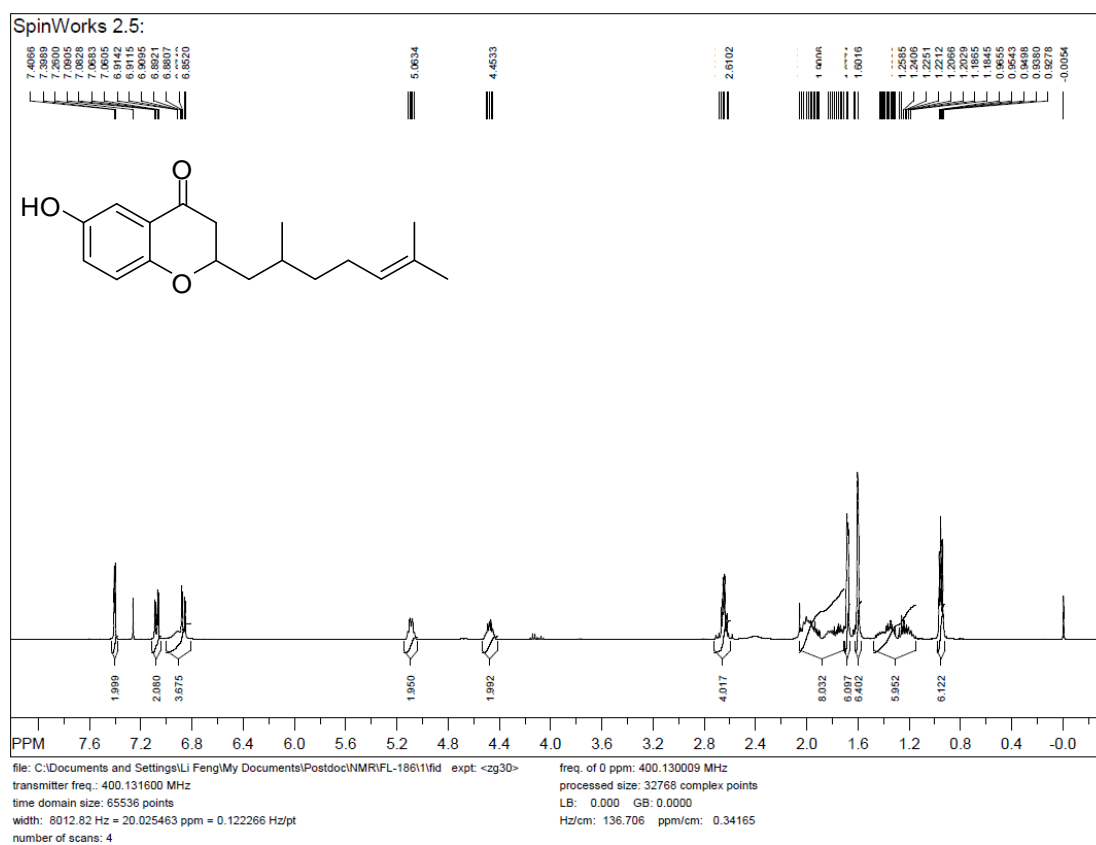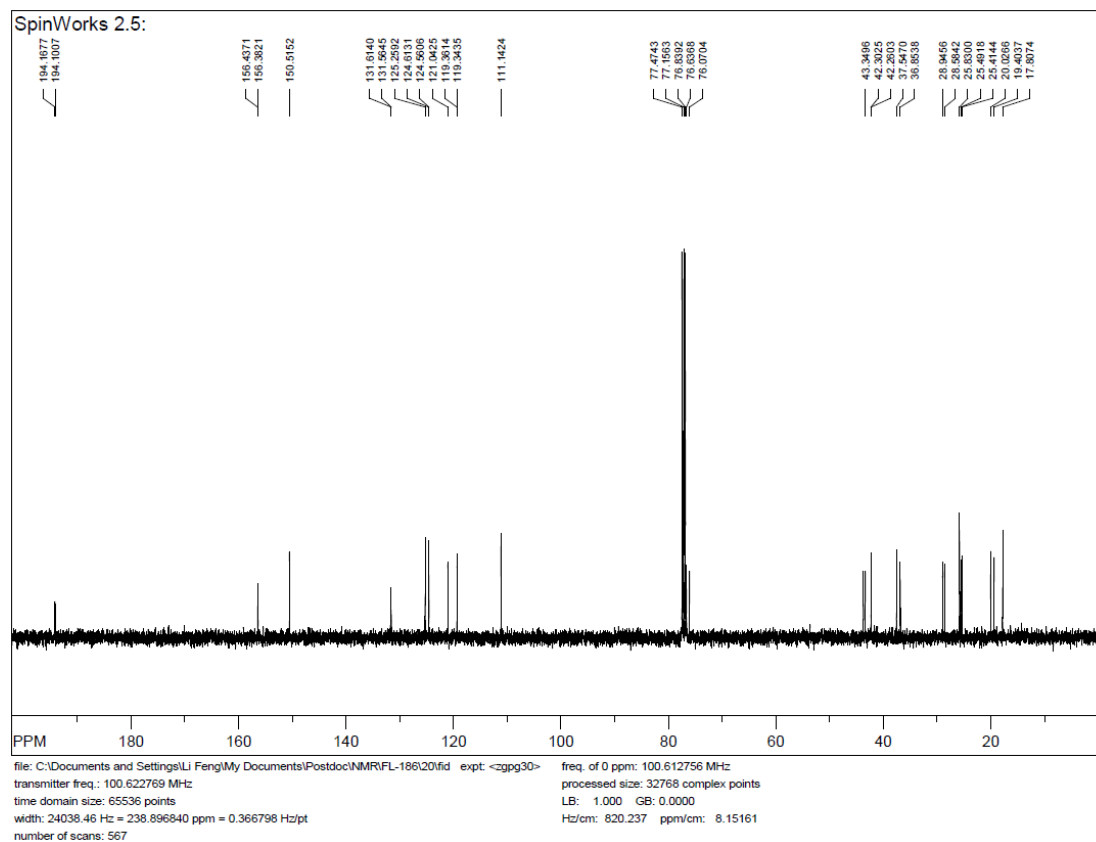

HPLC profile of 3k

### ==== Shimadzu LCsolution Analysis Report ====

Sample Name : FL-186-P  
 Tray# : 1  
 Vail # : 91  
 Injection Volume : 10 uL  
 Data File Name : FL-186-P.lcd  
 Method File Name : SDQ gradient.lcm  
 Batch File Name :  
 Data Acquired : 3/12/2012 2:17:22 PM

C:\LabSolutions\LCsolution\Sun\Feng\FL-186-P.lcd

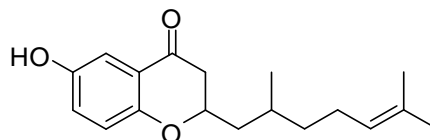

#### <Chromatogram>

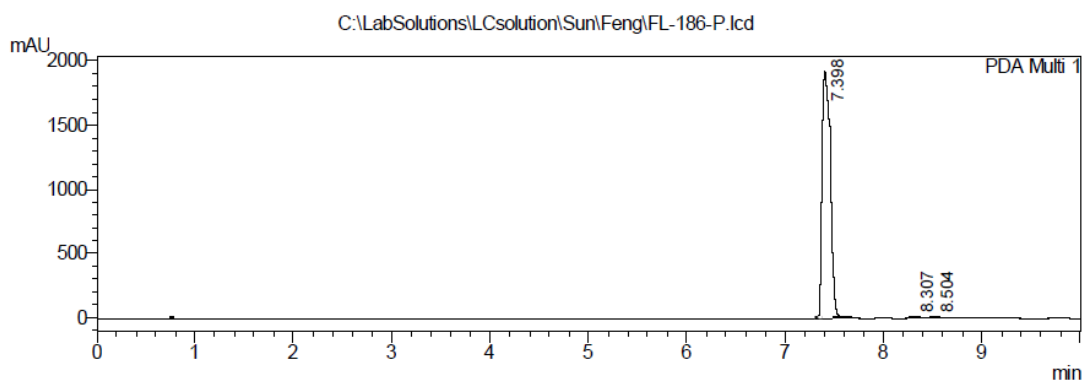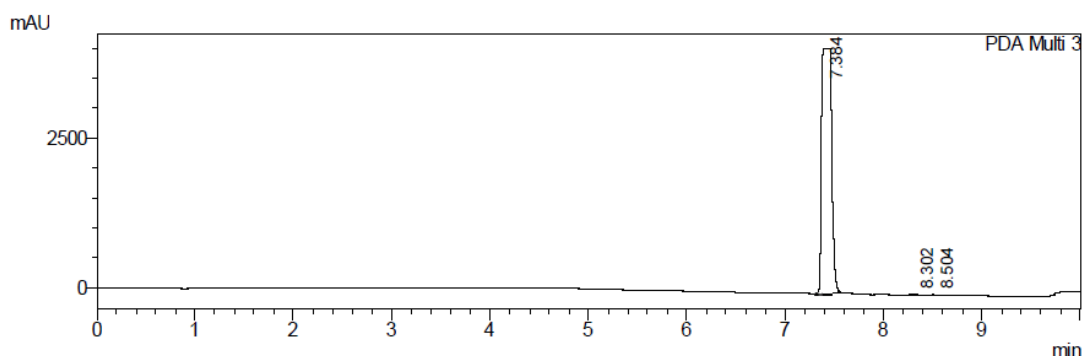

- 1 PDA Multi 1/254nm 4nm
- 2 PDA Multi 3/220nm 4nm

PeakTable

PDA Ch1 254nm 4nm

| Peak# | Ret. Time | Area     | Height  | Area %  | Height % |
|-------|-----------|----------|---------|---------|----------|
| 1     | 7.398     | 11218053 | 1908614 | 99.758  | 99.620   |
| 2     | 8.307     | 13698    | 3564    | 0.122   | 0.186    |
| 3     | 8.504     | 13466    | 3711    | 0.120   | 0.194    |
| Total |           | 11245217 | 1915890 | 100.000 | 100.000  |

PeakTable

PDA Ch3 220nm 4nm

| Peak# | Ret. Time | Area     | Height  | Area %  | Height % |
|-------|-----------|----------|---------|---------|----------|
| 1     | 7.384     | 29465755 | 4083768 | 99.711  | 99.564   |
| 2     | 8.302     | 58447    | 11464   | 0.198   | 0.280    |
| 3     | 8.504     | 26810    | 6400    | 0.091   | 0.156    |
| Total |           | 29551012 | 4101632 | 100.000 | 100.000  |



# HRMS of 3k

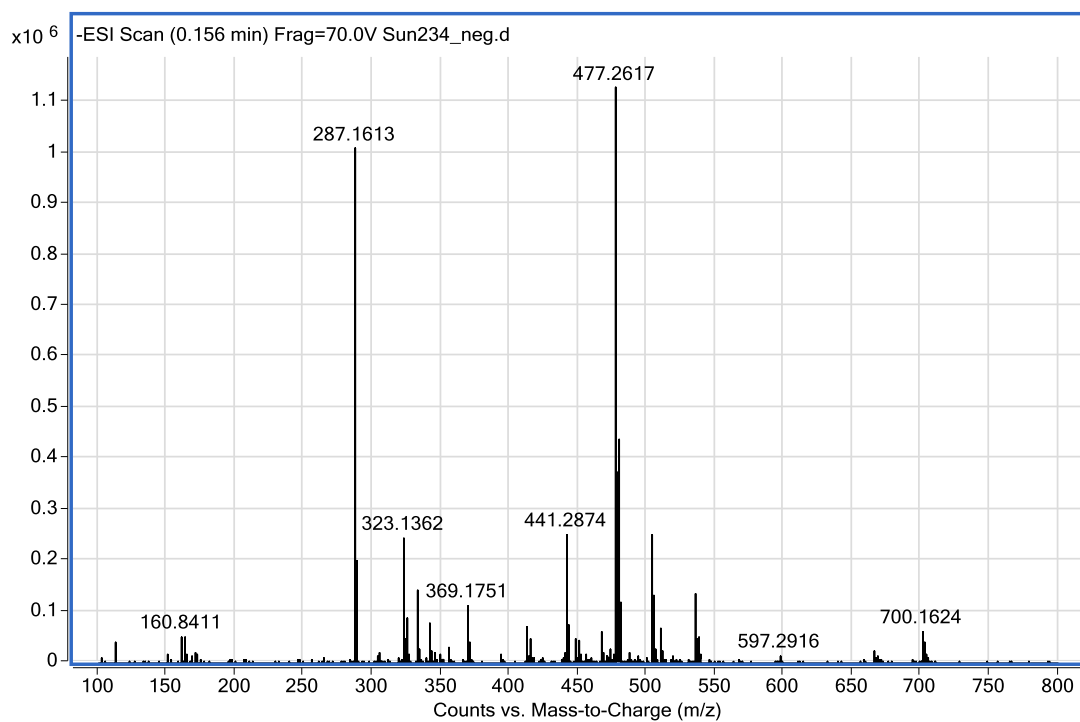

$^1\text{H}$  and  $^{13}\text{C}$  NMR spectra of **31**

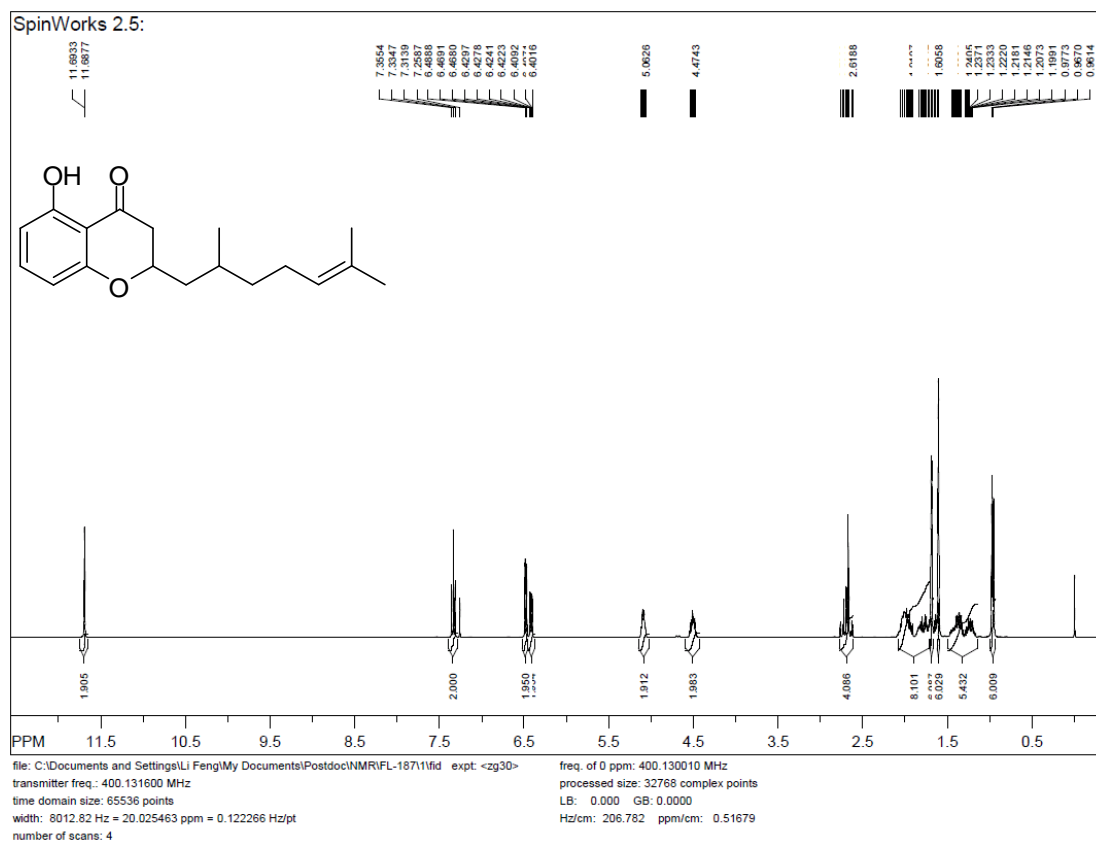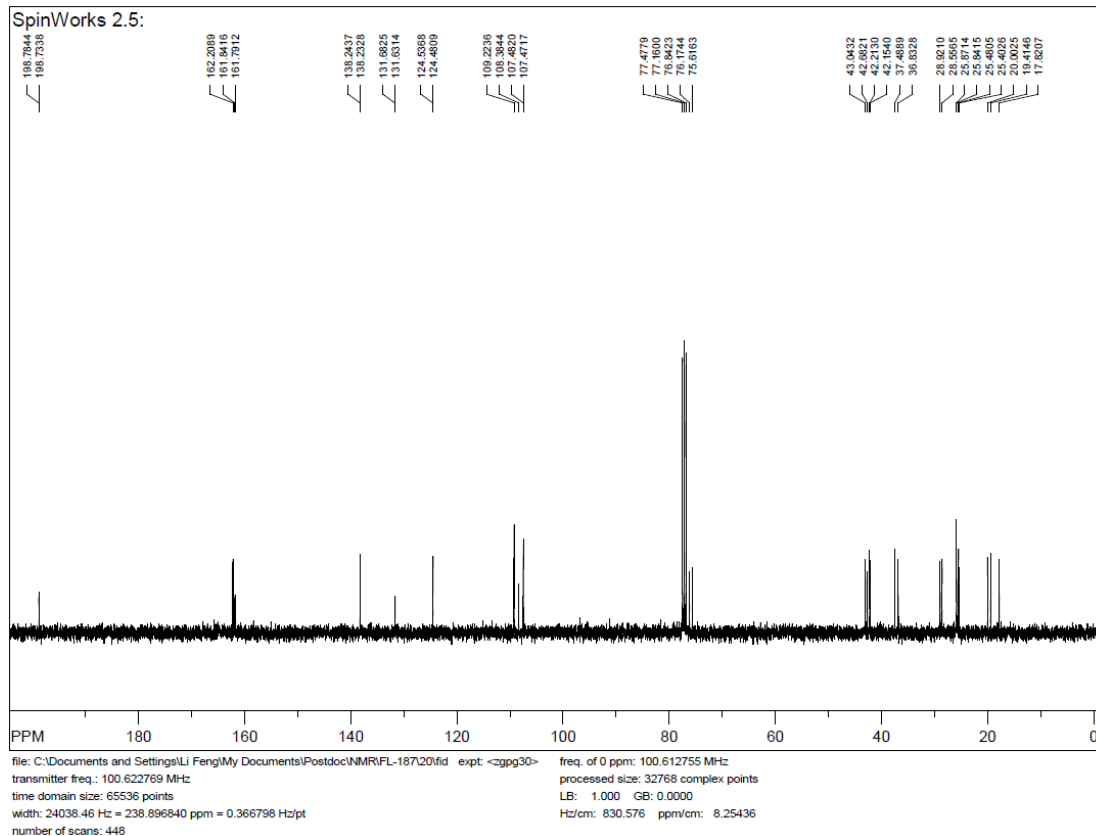

HPLC profile of 3I

### ==== Shimadzu LCsolution Analysis Report ====

Sample Name : FL-187-P  
Tray# : 1  
Vial # : 91  
Injection Volume : 10 uL  
Data File Name : FL-187-P.lcd  
Method File Name : SDQ gradient.lcm  
Batch File Name :  
Data Acquired : 3/13/2012 2:06:54 PM

C:\LabSolutions\LCsolution\Sun\Feng\FL-187-P.lcd

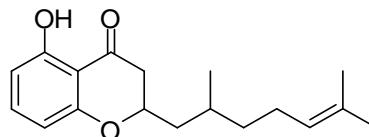

#### <Chromatogram>

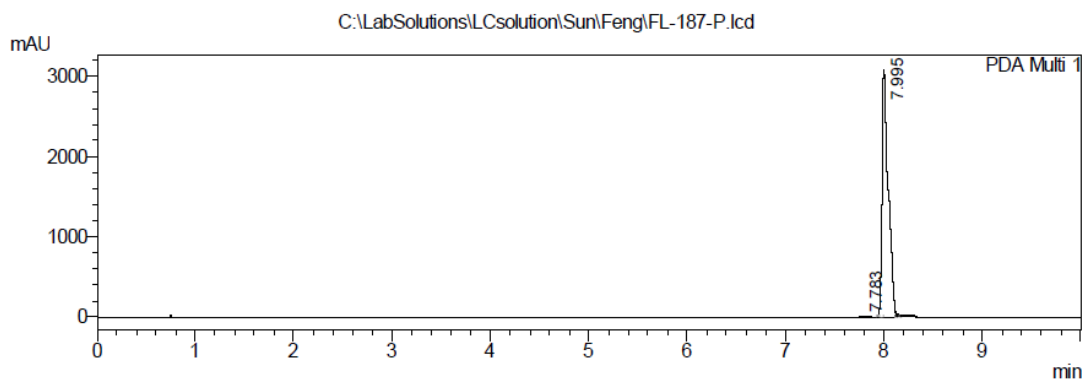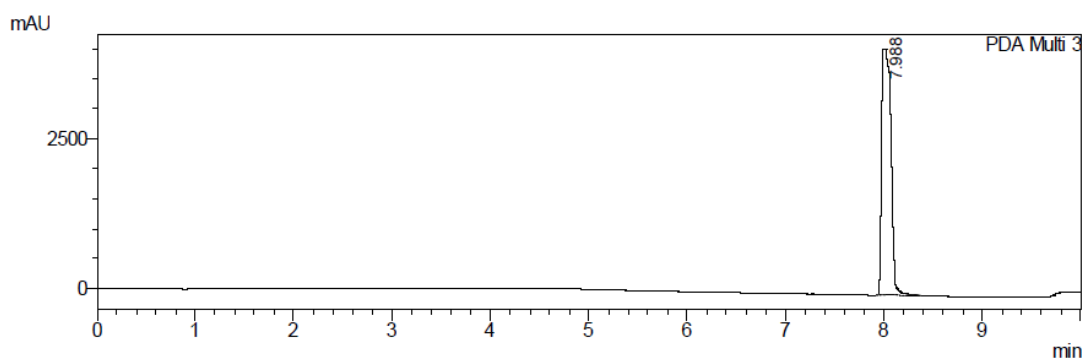

- 1 PDA Multi 1/254nm 4nm
- 2 PDA Multi 3/220nm 4nm

PeakTable

PDA Ch1 254nm 4nm

| Peak# | Ret. Time | Area     | Height  | Area %  | Height % |
|-------|-----------|----------|---------|---------|----------|
| 1     | 7.783     | 16231    | 4167    | 0.116   | 0.136    |
| 2     | 7.995     | 14010644 | 3070812 | 99.884  | 99.864   |
| Total |           | 14026875 | 3074979 | 100.000 | 100.000  |

PeakTable

PDA Ch3 220nm 4nm

| Peak# | Ret. Time | Area     | Height  | Area %  | Height % |
|-------|-----------|----------|---------|---------|----------|
| 1     | 7.988     | 27678026 | 4099350 | 100.000 | 100.000  |
| Total |           | 27678026 | 4099350 | 100.000 | 100.000  |

# HRMS of 3I

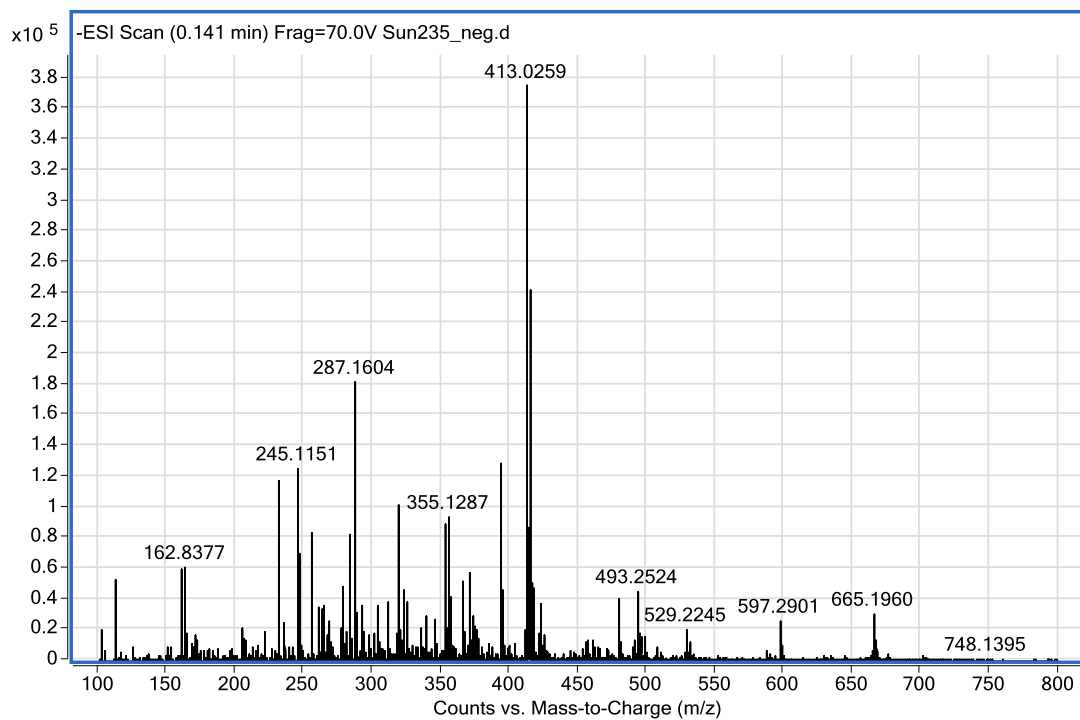

<sup>1</sup>H and <sup>13</sup>C NMR spectra of **3h**

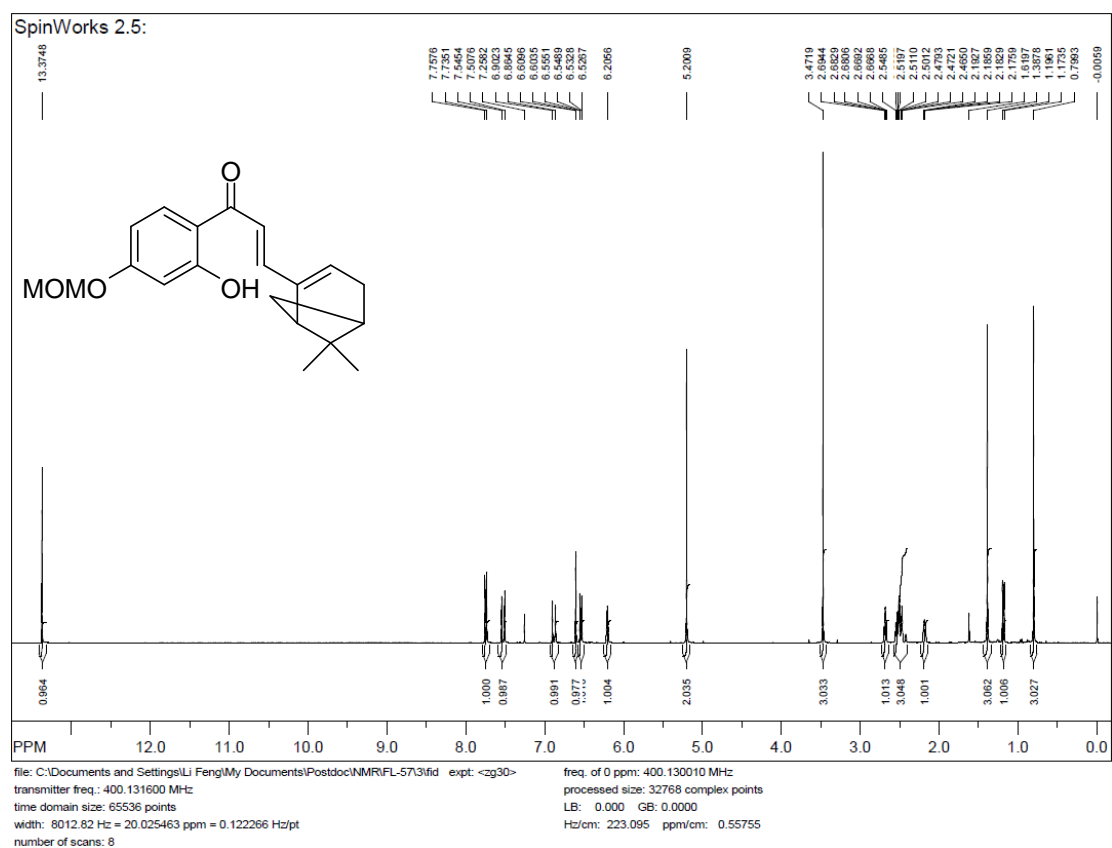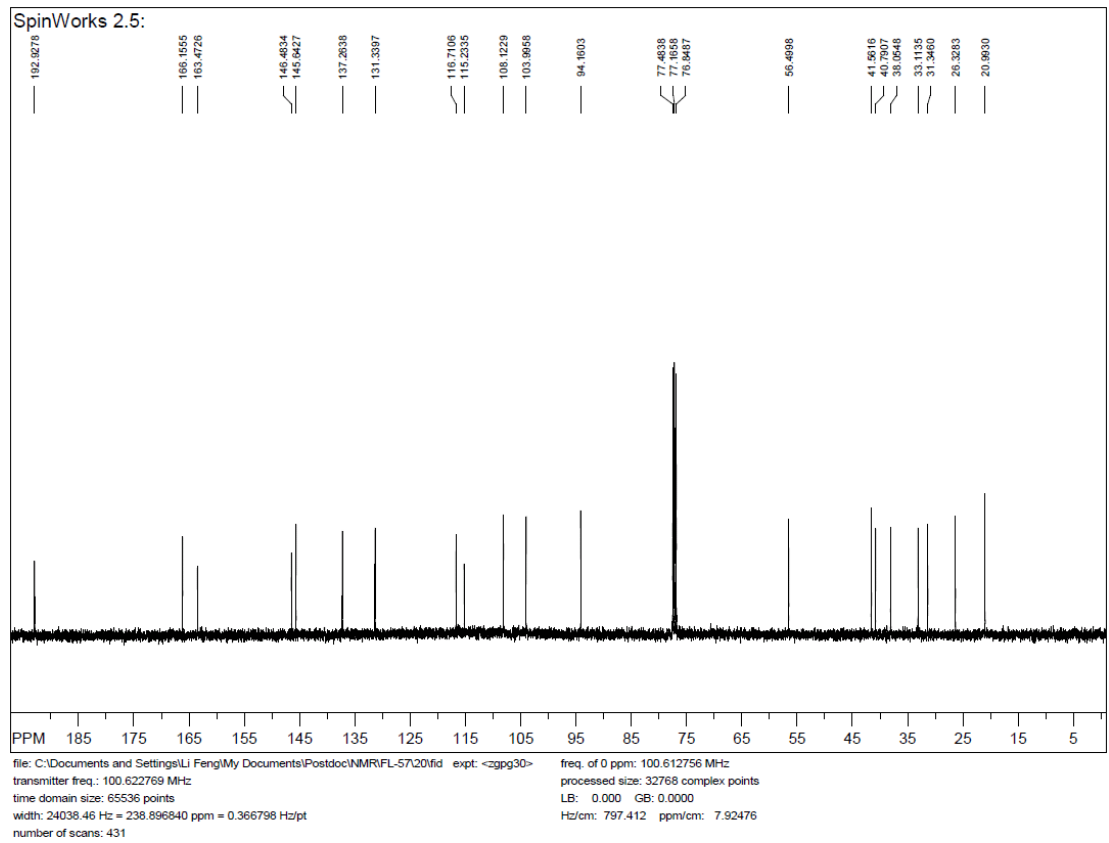

HPLC profile of 3h

==== Shimadzu LCsolution Analysis Report ====

Sample Name : FL-57-P  
 Tray# : 1  
 Vial # : 91  
 Injection Volume : 20 uL  
 Data File Name : FL-57-P.lcd  
 Method File Name : SDQ gradient.lcm  
 Batch File Name :  
 Data Acquired : 12/2/2011 4:46:07 PM

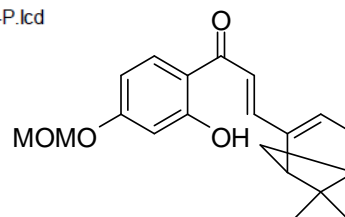

<Chromatogram>

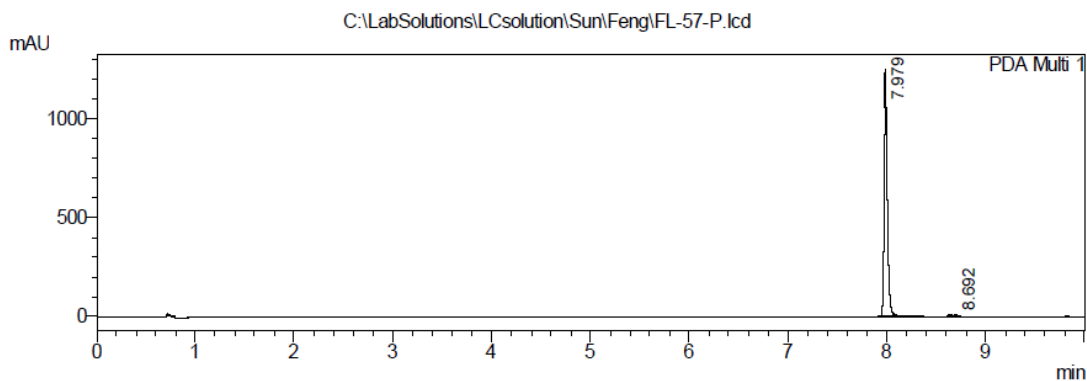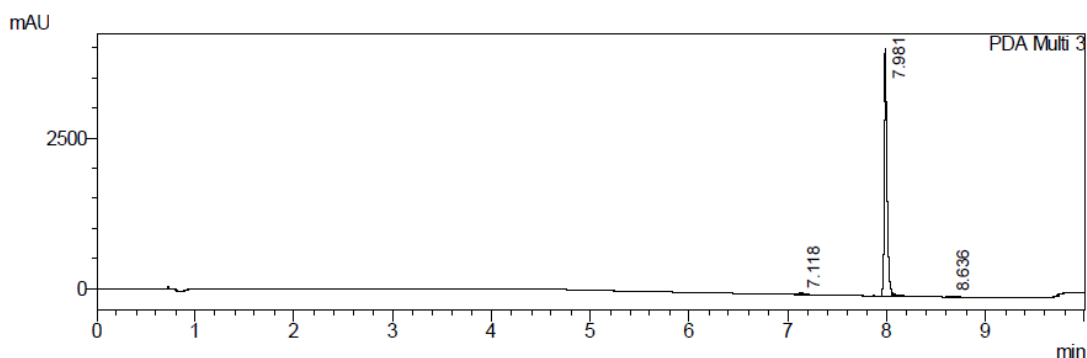

- 1 PDA Multi 1/254nm 4nm
- 2 PDA Multi 3/220nm 4nm

PeakTable

PDA Ch1 254nm 4nm

| Peak# | Ret. Time | Area    | Height  | Area %  | Height % |
|-------|-----------|---------|---------|---------|----------|
| 1     | 7.979     | 3105651 | 1235106 | 98.809  | 99.251   |
| 2     | 8.692     | 37427   | 9324    | 1.191   | 0.749    |
| Total |           | 3143078 | 1244430 | 100.000 | 100.000  |

PeakTable

PDA Ch3 220nm 4nm

| Peak# | Ret. Time | Area    | Height  | Area %  | Height % |
|-------|-----------|---------|---------|---------|----------|
| 1     | 7.118     | 88162   | 20061   | 0.971   | 0.486    |
| 2     | 7.981     | 8949523 | 4096692 | 98.543  | 99.283   |
| 3     | 8.636     | 44145   | 9517    | 0.486   | 0.231    |
| Total |           | 9081831 | 4126270 | 100.000 | 100.000  |

### HRMS of 3h

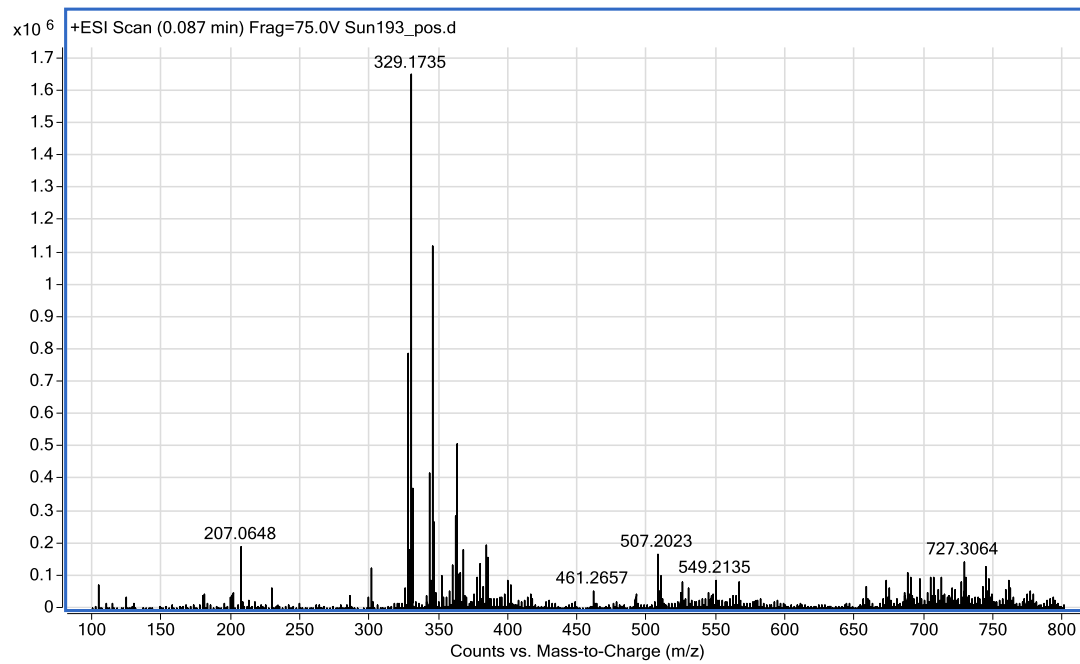

$^1\text{H}$  and  $^{13}\text{C}$  NMR spectra of **3g**

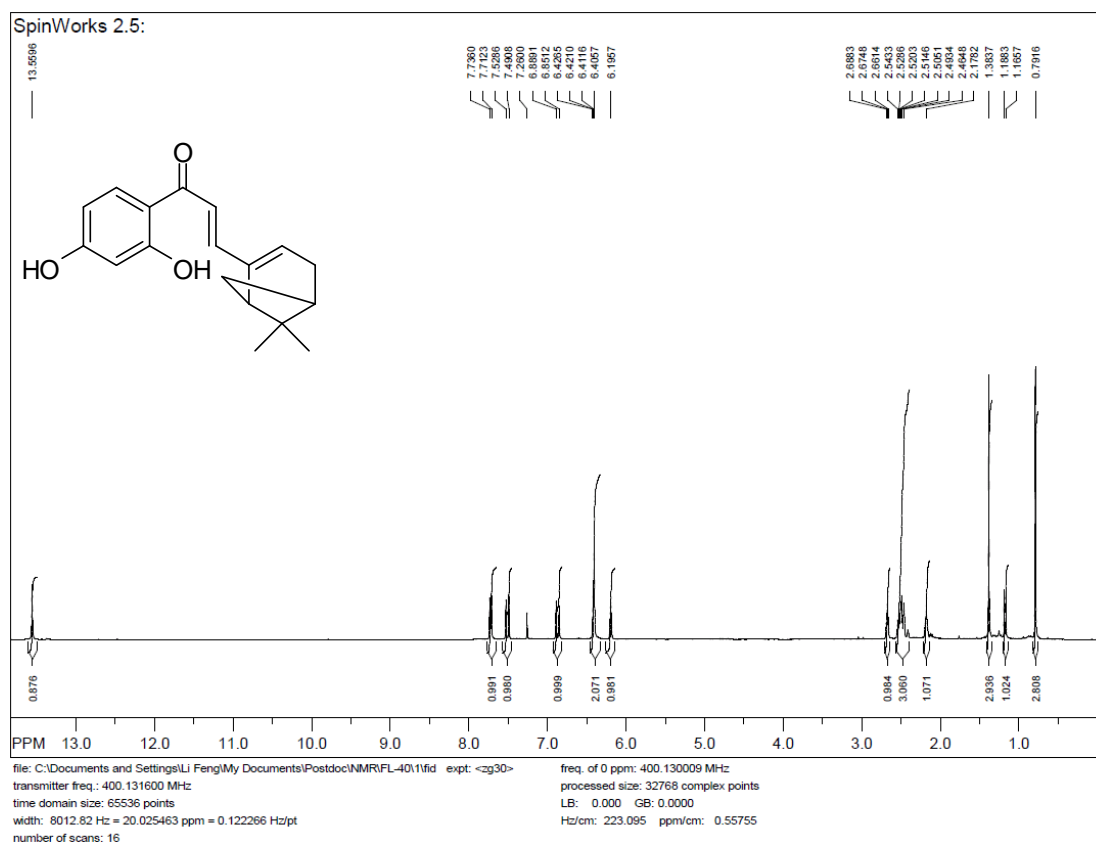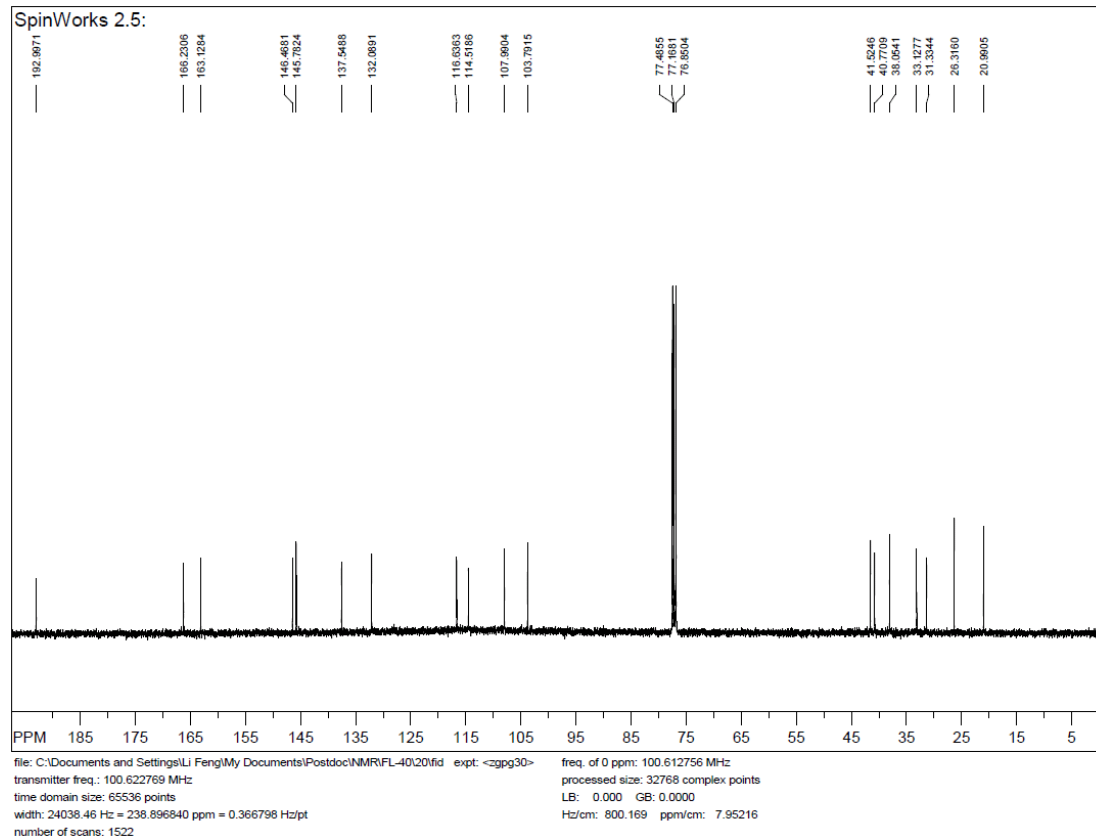



HPLC profile of 3g

==== Shimadzu LCsolution Analysis Report ====

Sample Name : FL-40-P  
 Tray# : 1  
 Vial # : 91  
 Injection Volume : 3 uL  
 Data File Name : FL-40-P.lcd  
 Method File Name : SDQ gradient.lcm  
 Batch File Name :  
 Data Acquired : 12/6/2011 3:40:08 PM

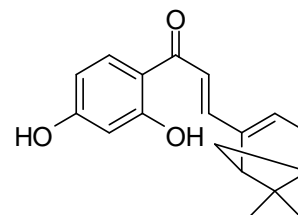

<Chromatogram>

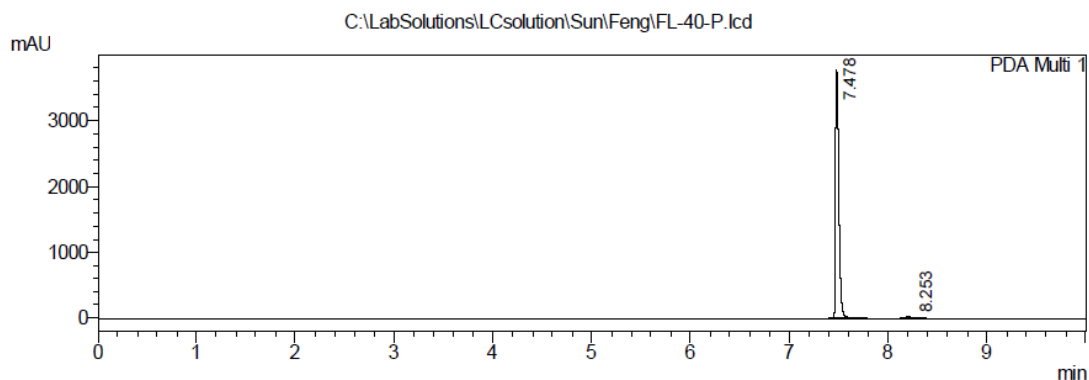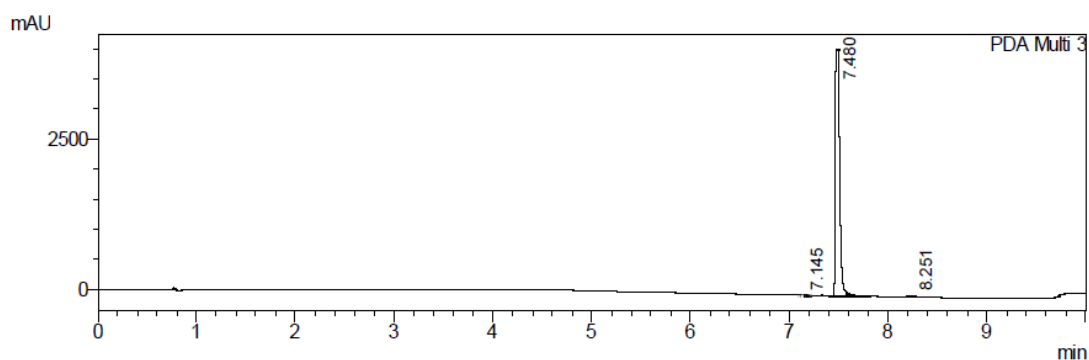

- 1 PDA Multi 1/254nm 4nm
- 2 PDA Multi 3/220nm 4nm

PeakTable

PDA Ch1 254nm 4nm

| Peak# | Ret. Time | Area    | Height  | Area %  | Height % |
|-------|-----------|---------|---------|---------|----------|
| 1     | 7.478     | 8505954 | 3643264 | 99.296  | 99.679   |
| 2     | 8.253     | 60315   | 11737   | 0.704   | 0.321    |
| Total |           | 8566269 | 3655001 | 100.000 | 100.000  |

PeakTable

PDA Ch3 220nm 4nm

| Peak# | Ret. Time | Area     | Height  | Area %  | Height % |
|-------|-----------|----------|---------|---------|----------|
| 1     | 7.145     | 55275    | 16808   | 0.429   | 0.408    |
| 2     | 7.480     | 12782274 | 4093945 | 99.159  | 99.313   |
| 3     | 8.251     | 53176    | 11505   | 0.413   | 0.279    |
| Total |           | 12890725 | 4122258 | 100.000 | 100.000  |

### HRMS of 3g

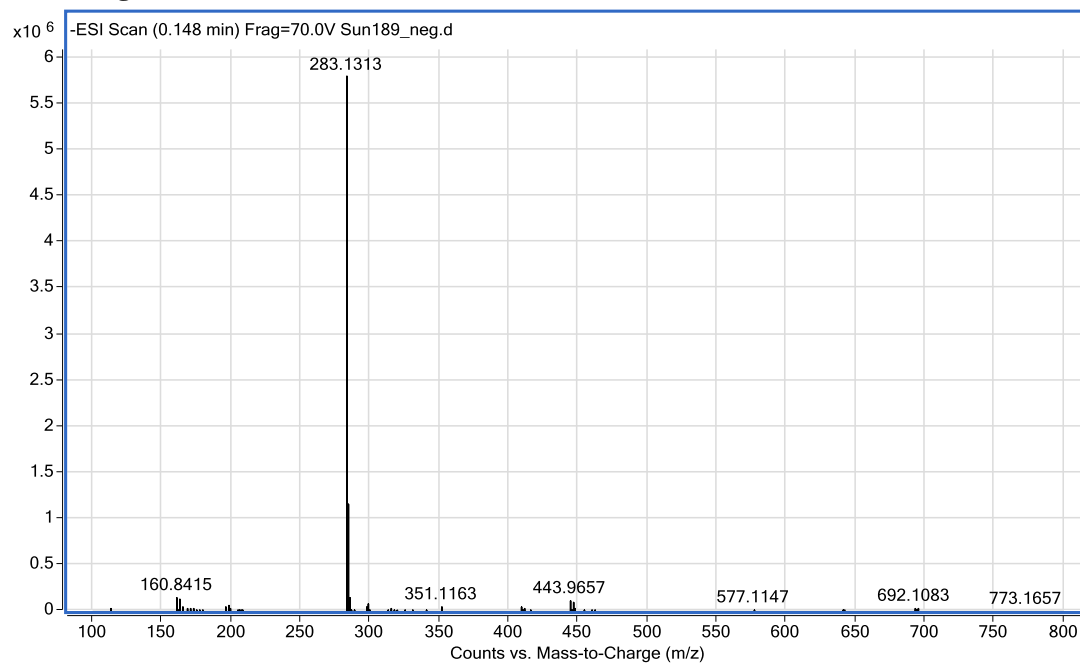

$^1\text{H}$  and  $^{13}\text{C}$  NMR spectra of **3i**

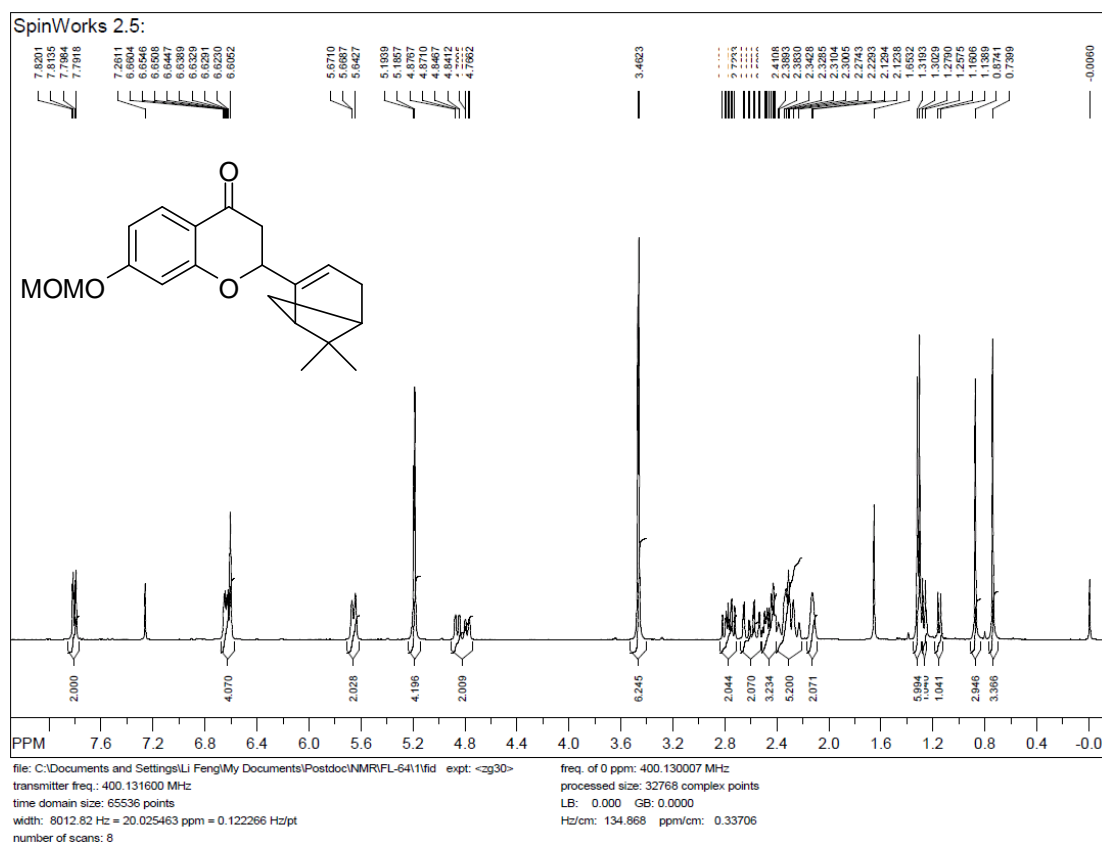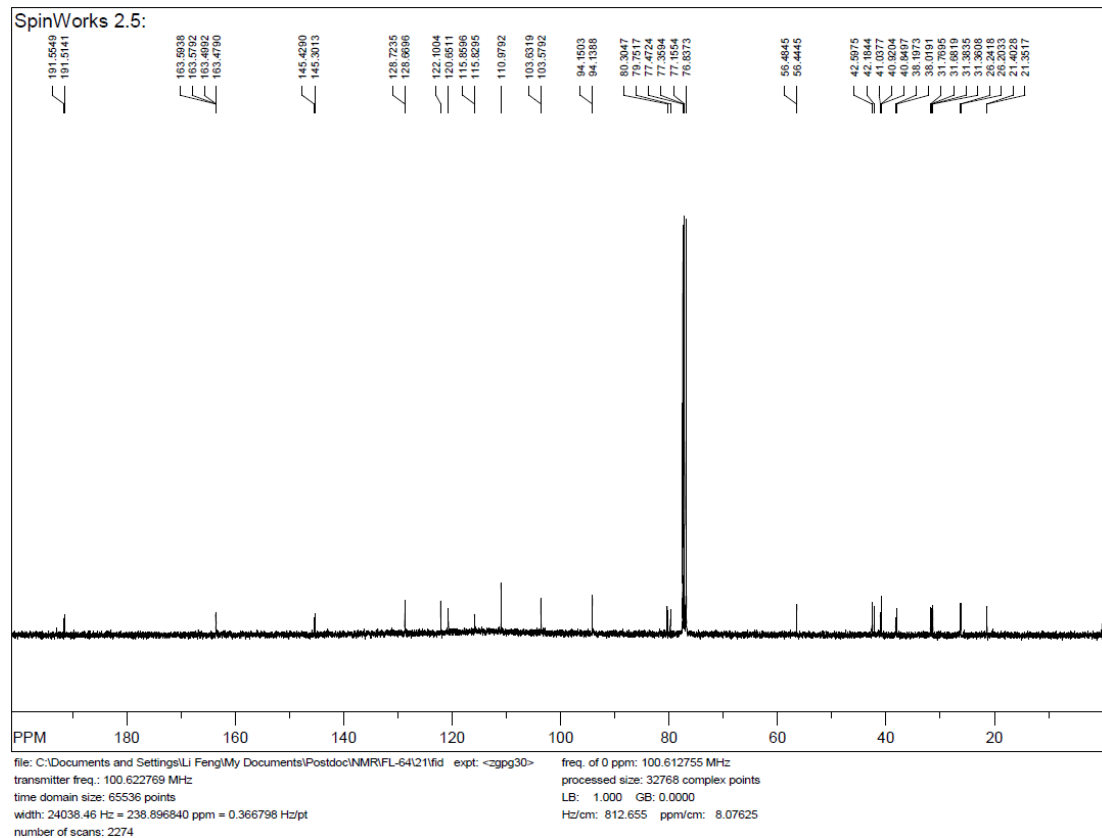

HPLC profile of 3i

==== Shimadzu LCsolution Analysis Report ====

Sample Name : FL-64-P  
 Tray# : 1  
 Vial # : 91  
 Injection Volume : 5 uL  
 Data File Name : FL-64-P.lcd  
 Method File Name : SDQ gradient.lcm  
 Batch File Name :  
 Data Acquired : 11/28/2011 5:36:07 PM

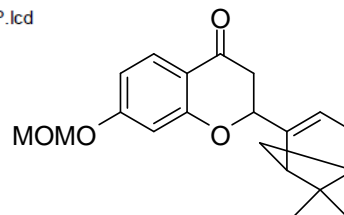

<Chromatogram>

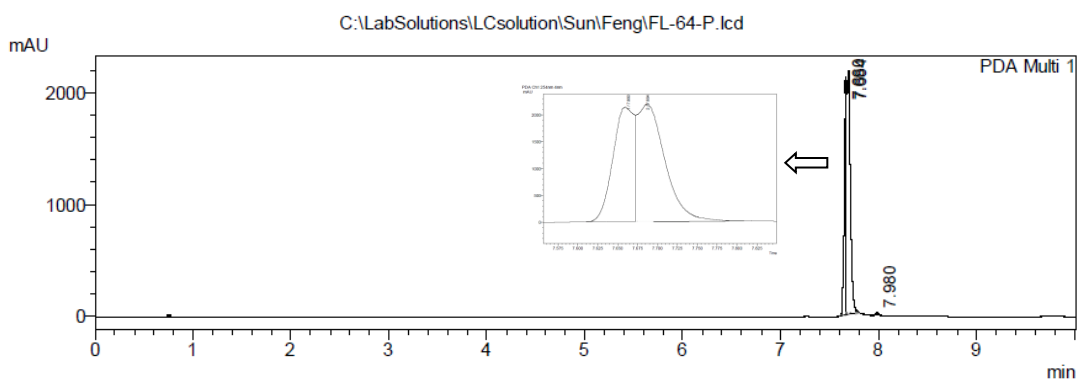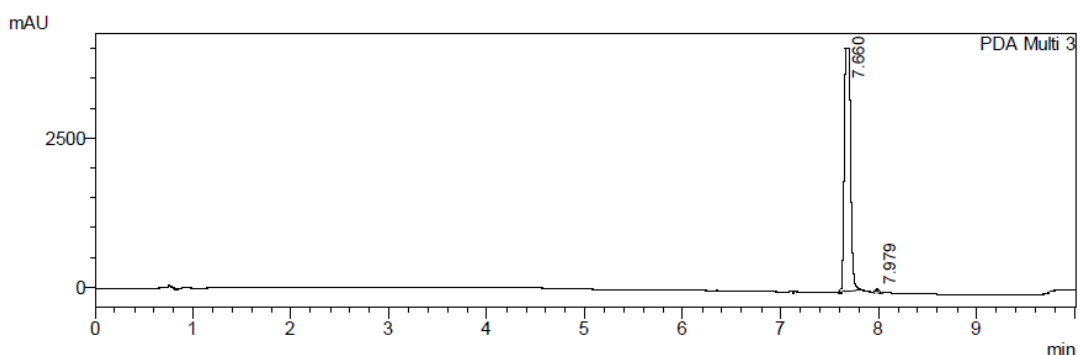

- 1 PDA Multi 1/254nm 4nm
- 2 PDA Multi 3/220nm 4nm

PeakTable

PDA Ch1 254nm 4nm

| Peak# | Ret. Time | Area    | Height  | Area %  | Height % |
|-------|-----------|---------|---------|---------|----------|
| 1     | 7.660     | 4084107 | 2103162 | 44.665  | 49.005   |
| 2     | 7.684     | 5029259 | 2170121 | 55.002  | 50.565   |
| 3     | 7.980     | 30472   | 18483   | 0.333   | 0.431    |
| Total |           | 9143837 | 4291766 | 100.000 | 100.000  |

PeakTable

PDA Ch3 220nm 4nm

| Peak# | Ret. Time | Area     | Height  | Area %  | Height % |
|-------|-----------|----------|---------|---------|----------|
| 1     | 7.660     | 19071139 | 4051657 | 99.455  | 98.799   |
| 2     | 7.979     | 104542   | 49253   | 0.545   | 1.201    |
| Total |           | 19175681 | 4100910 | 100.000 | 100.000  |

\*A split HPLC trace (7.66 min and 7.68 min) under 254 nm further supported that the product was formed as a mixture of two diastereomers.

# HRMS of 3i

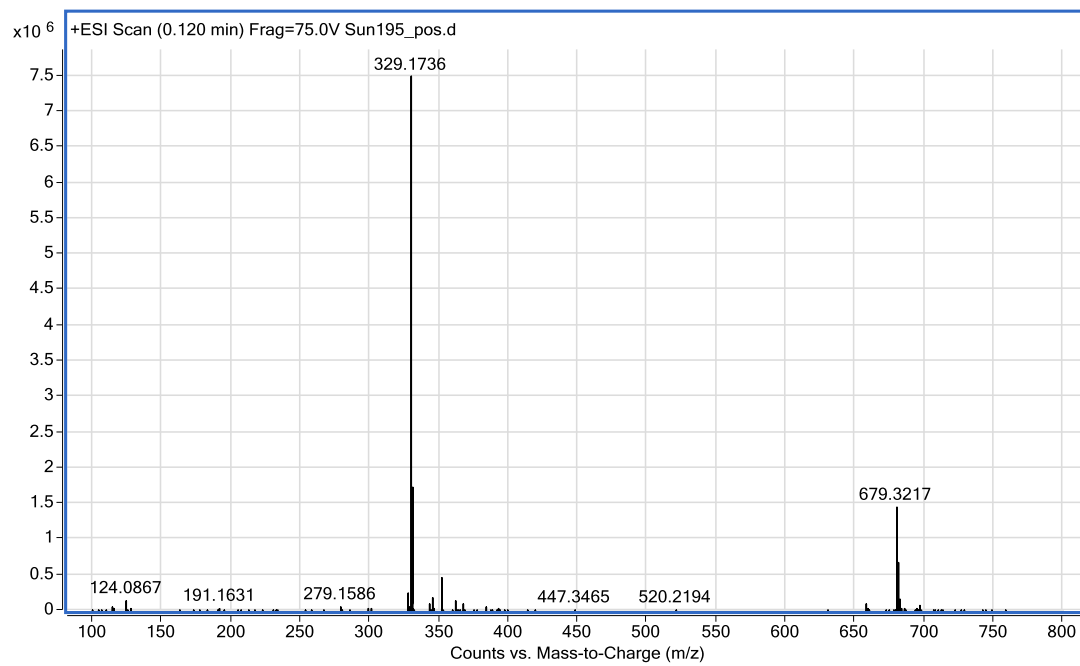

<sup>1</sup>H and <sup>13</sup>C NMR spectra of **3j**

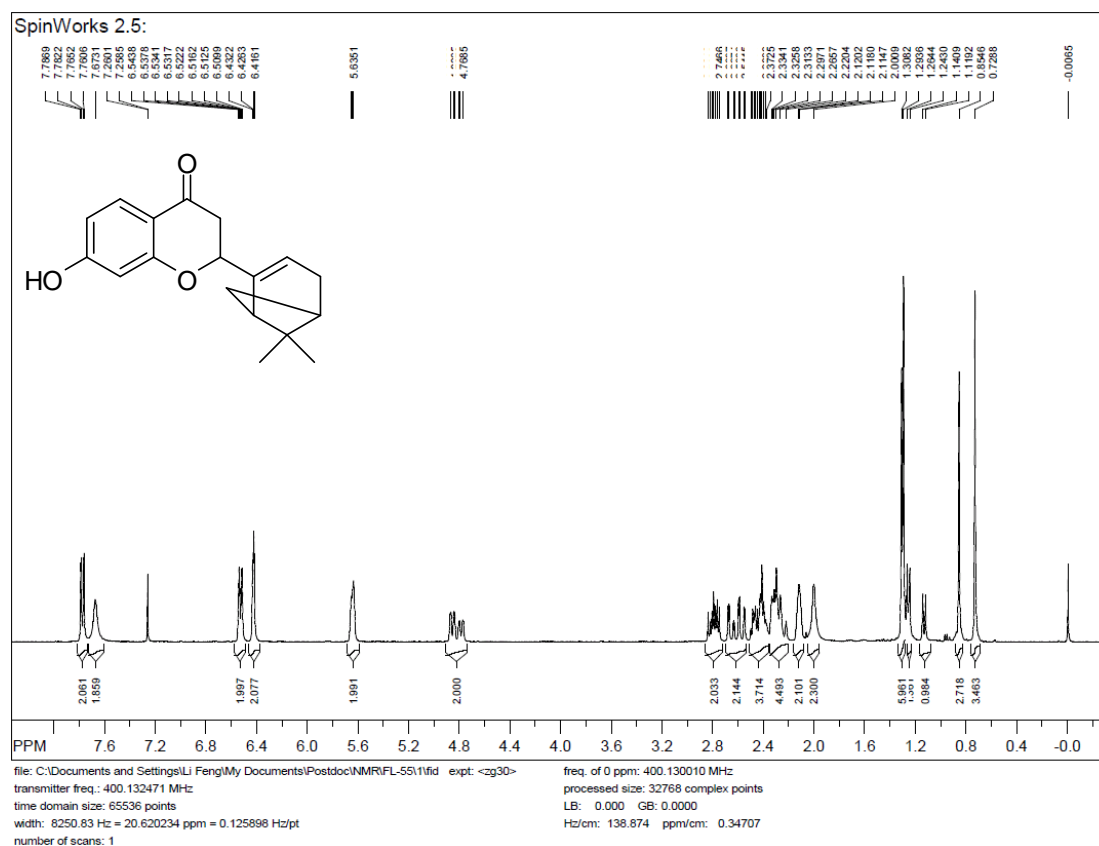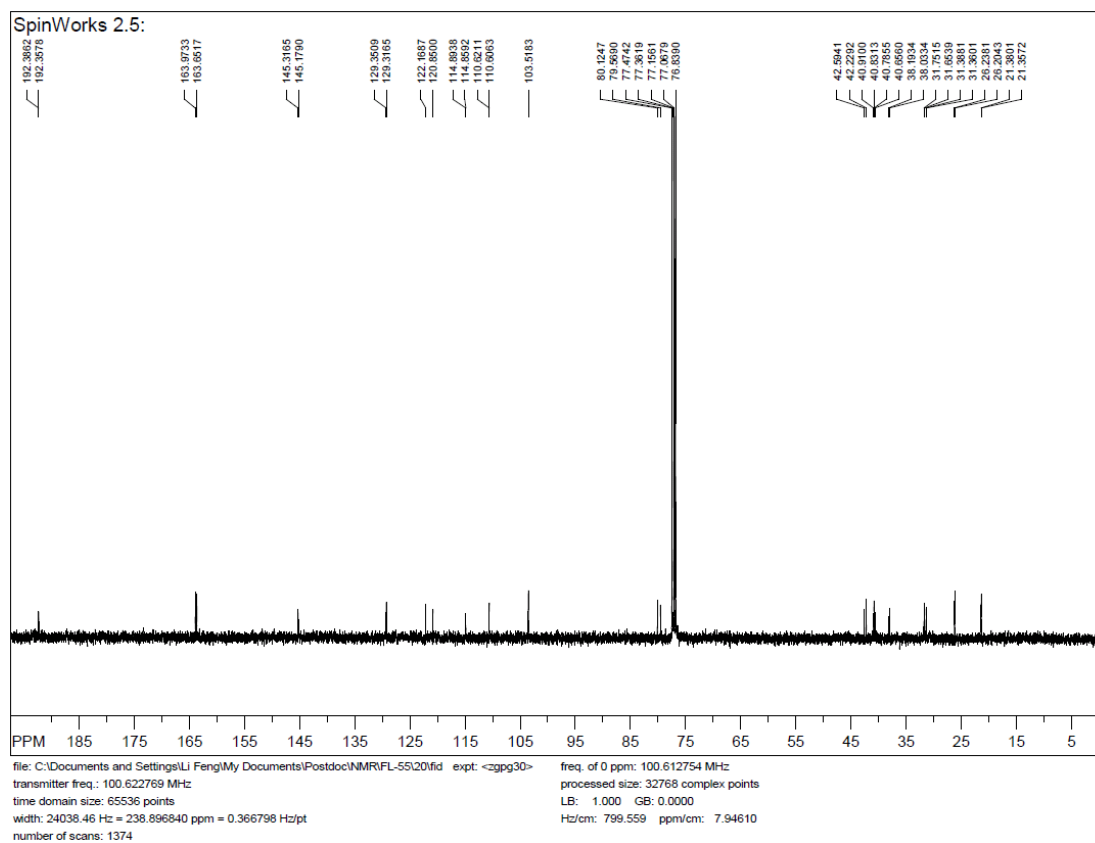

HPLC profile of 3j

==== Shimadzu LCsolution Analysis Report ====

Sample Name : FL-55-P  
 Tray# : 1  
 Vail # : 91  
 Injection Volume : 5 uL  
 Data File Name : FL-55-P.lcd  
 Method File Name : SDQ gradient.lcm  
 Batch File Name :  
 Data Acquired : 11/28/2011 5:25:06 PM

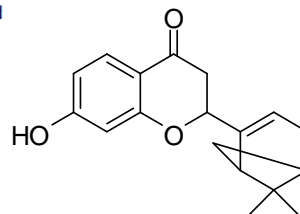

<Chromatogram>

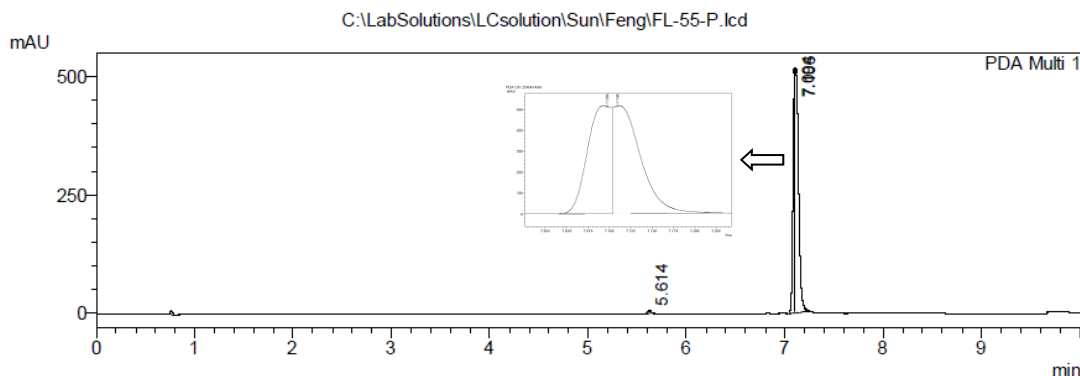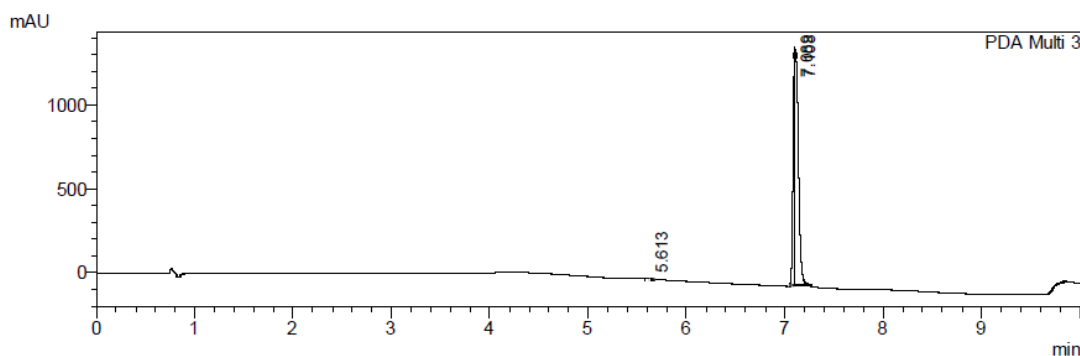

- 1 PDA Multi 1/254nm 4nm
- 2 PDA Multi 3/220nm 4nm

PeakTable

PDA Ch1 254nm 4nm

| Peak# | Ret. Time | Area    | Height  | Area %  | Height % |
|-------|-----------|---------|---------|---------|----------|
| 1     | 5.614     | 12167   | 6040    | 0.565   | 0.584    |
| 2     | 7.094     | 1060621 | 513987  | 49.280  | 49.684   |
| 3     | 7.106     | 1079451 | 514480  | 50.155  | 49.732   |
| Total |           | 2152239 | 1034507 | 100.000 | 100.000  |

PeakTable

PDA Ch3 220nm 4nm

| Peak# | Ret. Time | Area    | Height  | Area %  | Height % |
|-------|-----------|---------|---------|---------|----------|
| 1     | 5.613     | 24787   | 11545   | 0.431   | 0.409    |
| 2     | 7.089     | 2893672 | 1428123 | 50.335  | 50.591   |
| 3     | 7.108     | 2830365 | 1383196 | 49.234  | 49.000   |
| Total |           | 5748824 | 2822864 | 100.000 | 100.000  |

\*A split HPLC trace (7.09 min and 7.11 min) further supported that the product was formed as a mixture of two diastereomers.

# HRMS of 3j

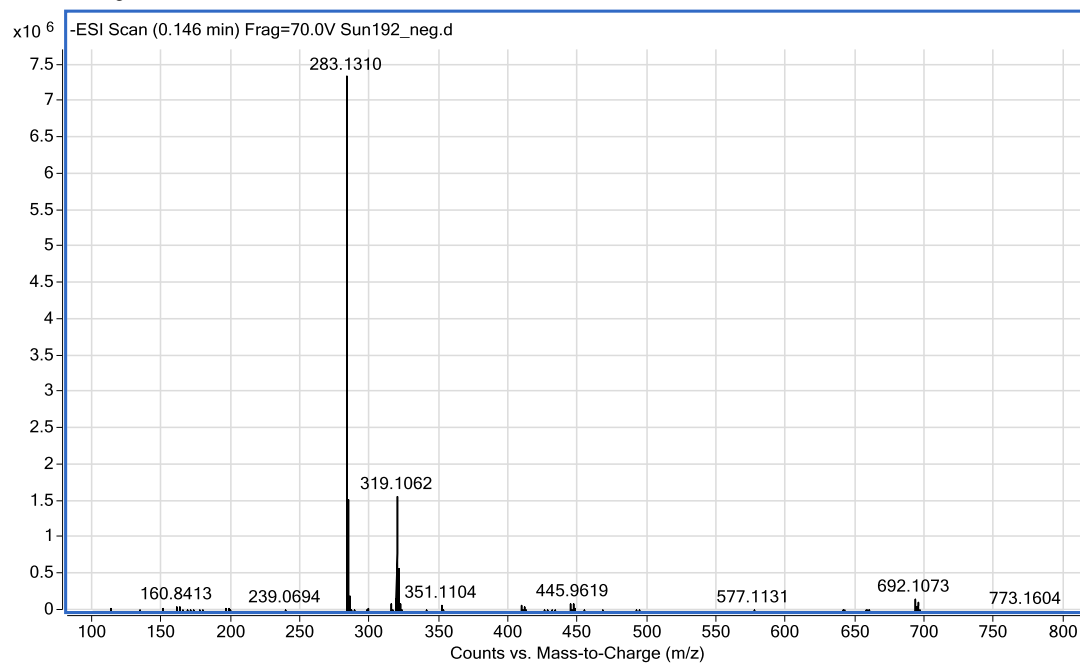



<sup>1</sup>H and <sup>13</sup>C NMR spectra of **4a**

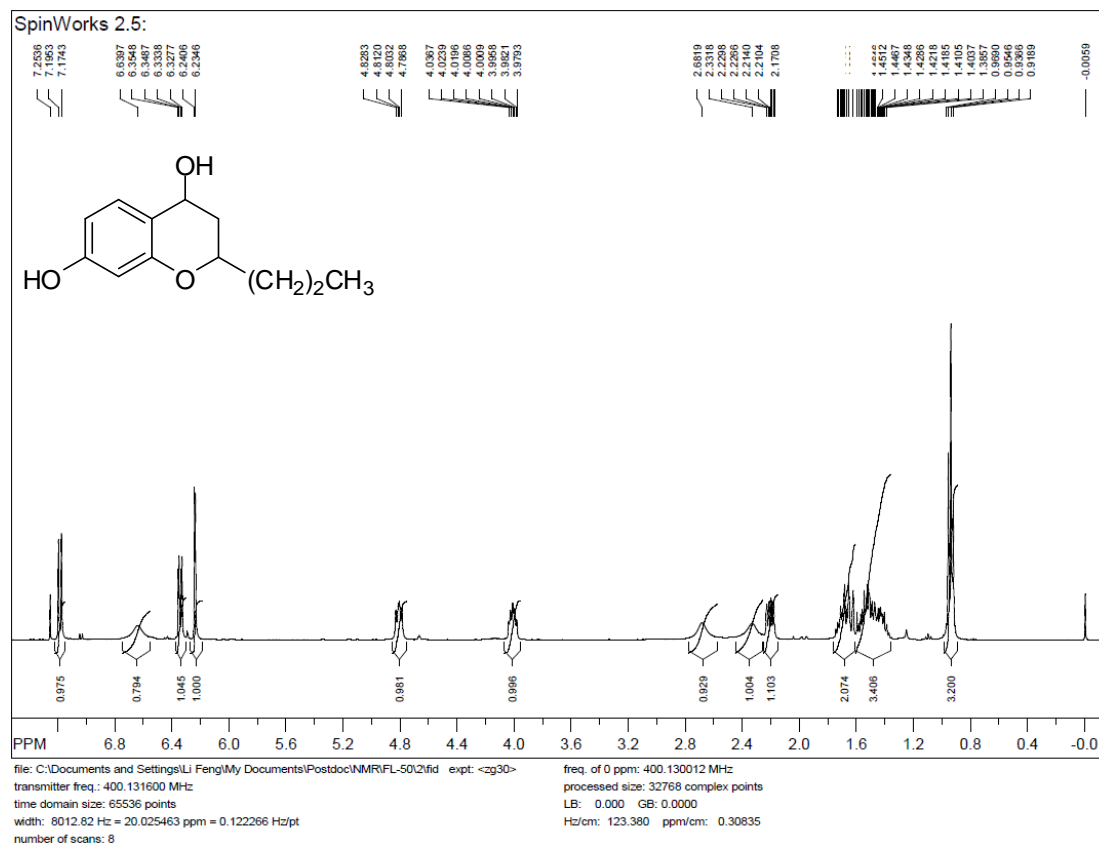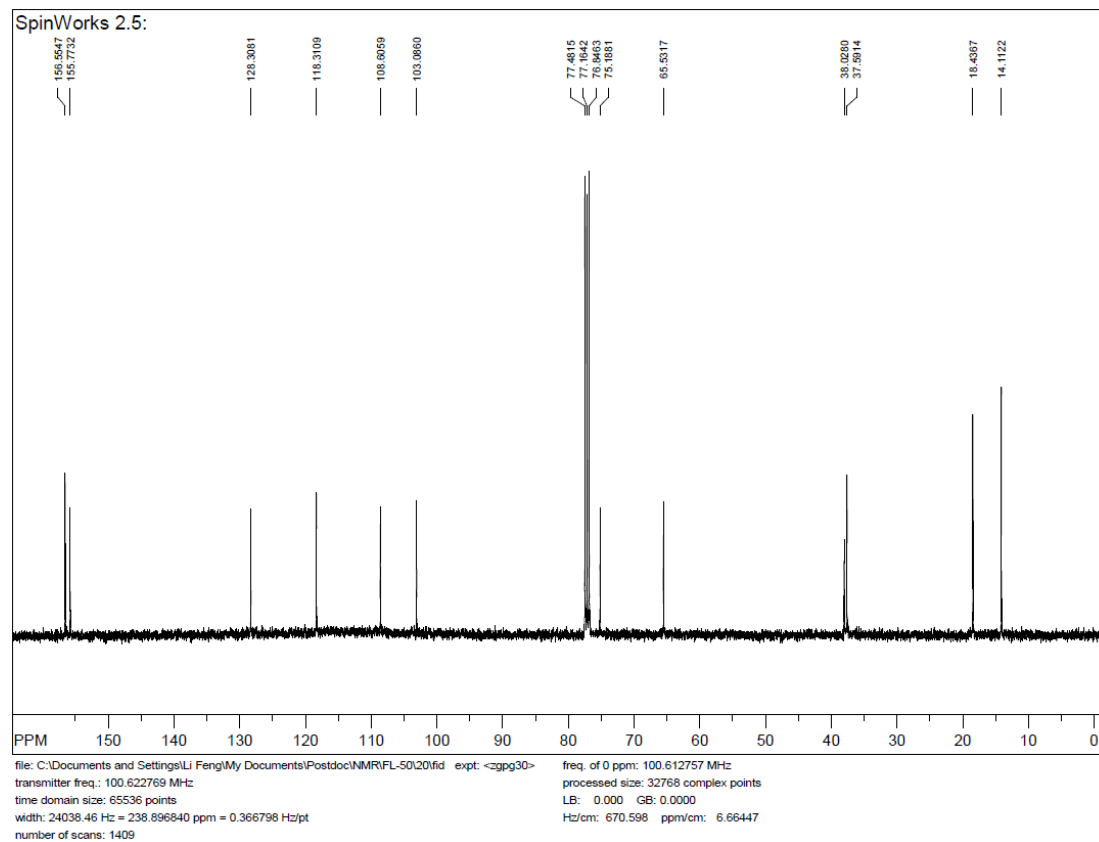

HPLC profile of 4a

==== Shimadzu LCsolution Analysis Report ====

Sample Name : FL-50-P  
Tray# : 1  
Vial # : 93  
Injection Volume : 15 uL  
Data File Name : FL-50-P.lcd  
Method File Name : SDQ gradient.lcm  
Batch File Name : Batch 1.lcb  
Data Acquired : 11/9/2011 3:48:36 PM

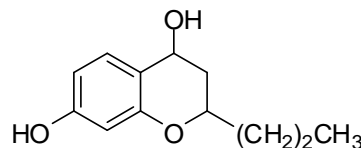

<Chromatogram>

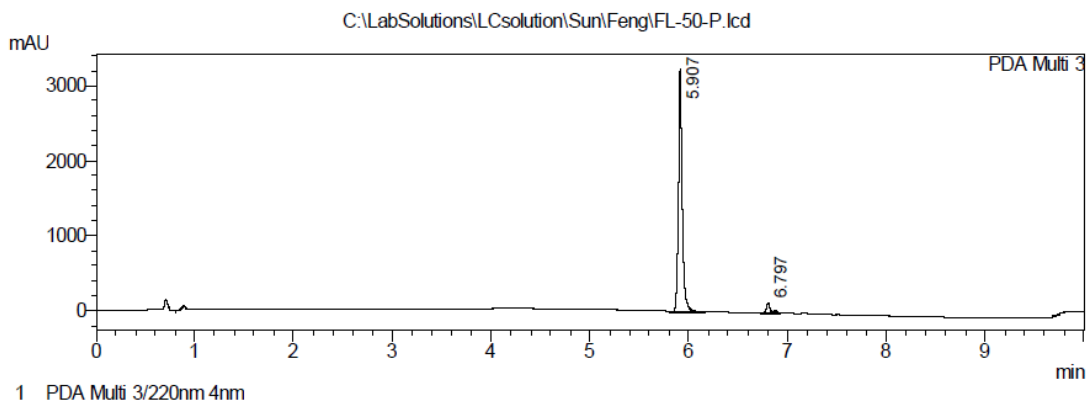

PeakTable

| Peak# | Ret. Time | Area    | Height  | Area %  | Height % |
|-------|-----------|---------|---------|---------|----------|
| 1     | 5.907     | 9445358 | 3235926 | 95.250  | 95.844   |
| 2     | 6.797     | 471019  | 140322  | 4.750   | 4.156    |
| Total |           | 9916377 | 3376248 | 100.000 | 100.000  |

\*The HPLC trace at 254 nm of the product is not shown because of the very weak UV-absorption of the product.

# HRMS of 4a

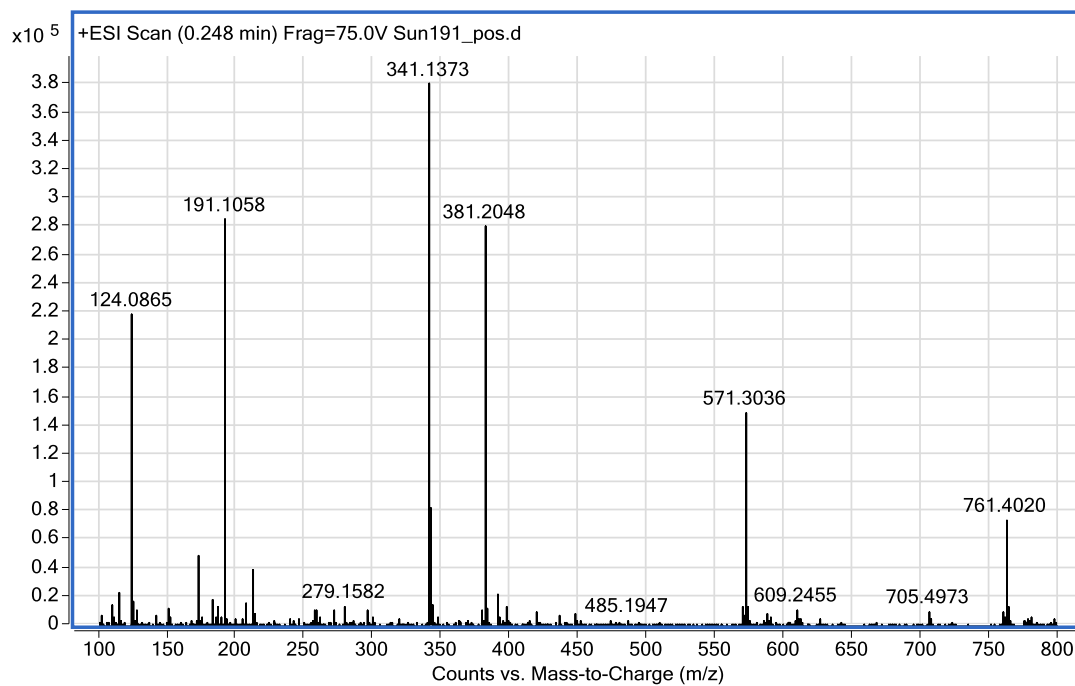

<sup>1</sup>H and <sup>13</sup>C NMR spectra of **4b**

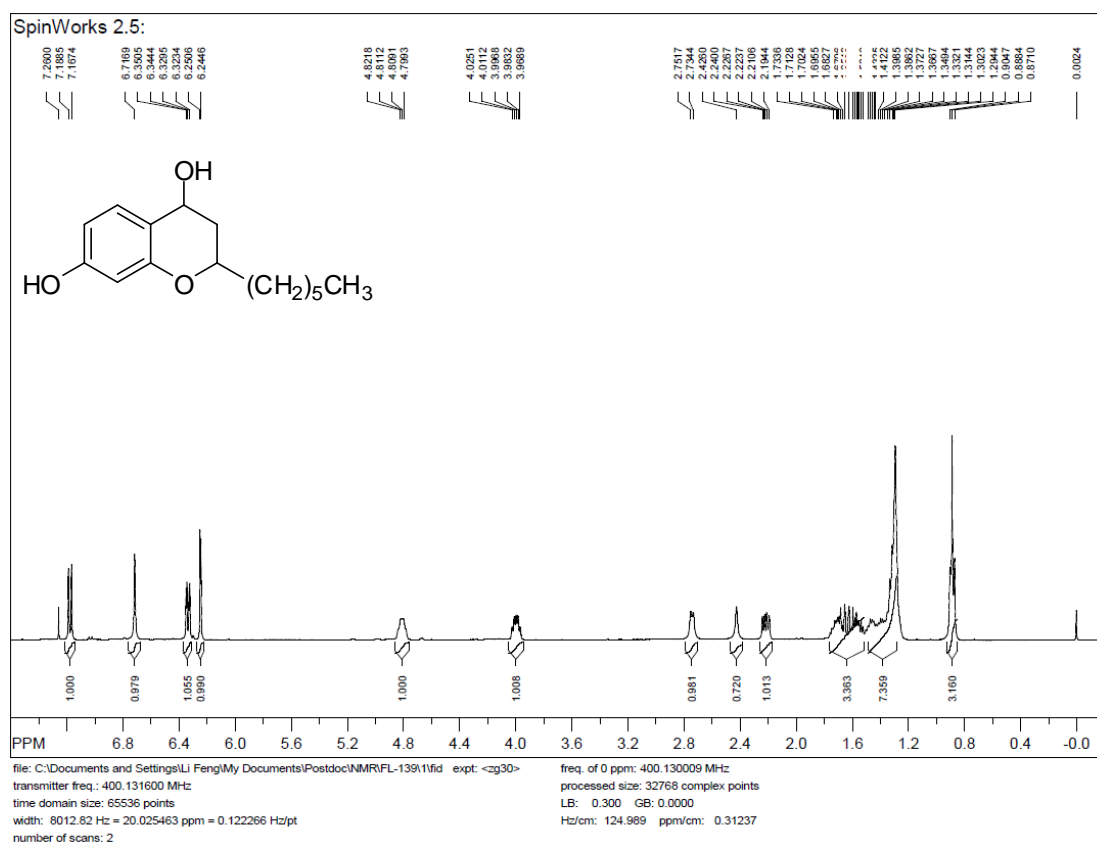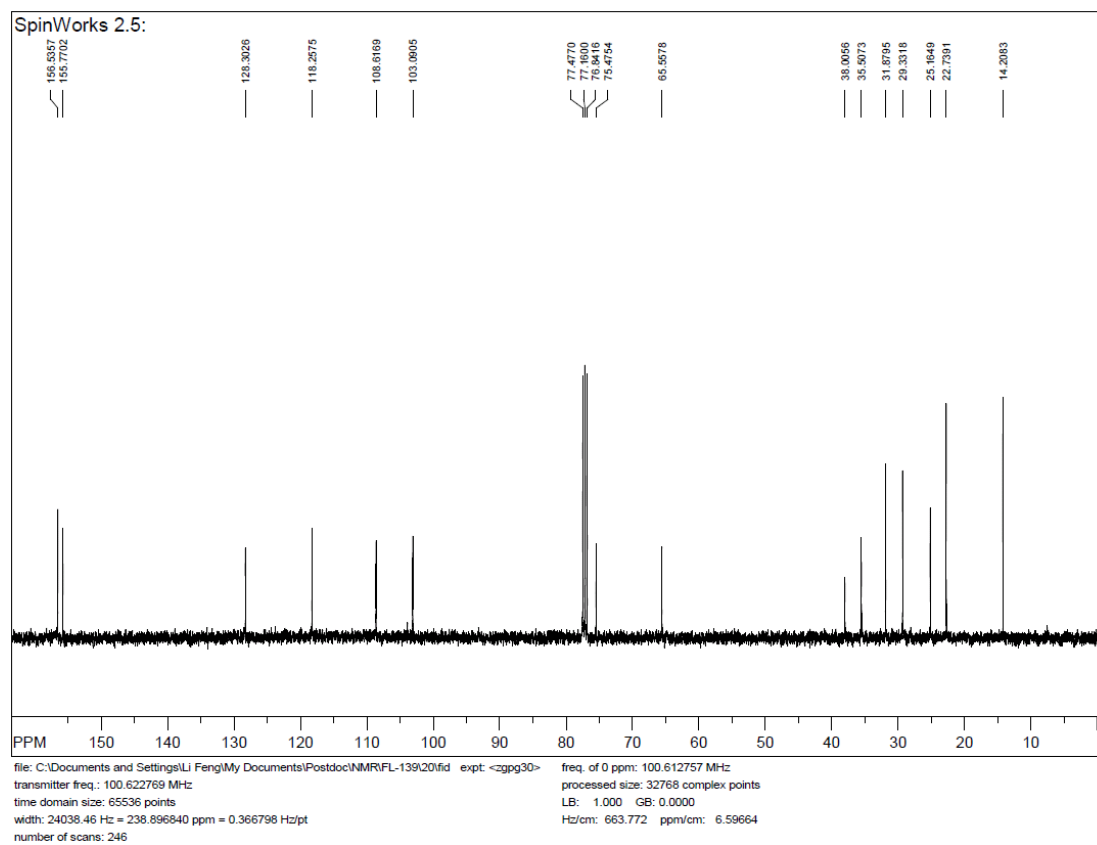

HPLC profile of 4b

==== Shimadzu LCsolution Analysis Report ====

Sample Name : FL-139-P  
Tray# : 1  
Vial # : 91  
Injection Volume : 10 uL  
Data File Name : FL-139-P.lcd  
Method File Name : SDQ gradient.lcm  
Batch File Name :  
Data Acquired : 2/6/2012 1:26:35 PM

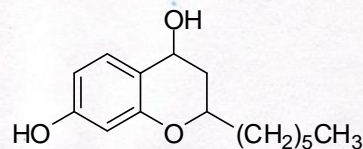

<Chromatogram>

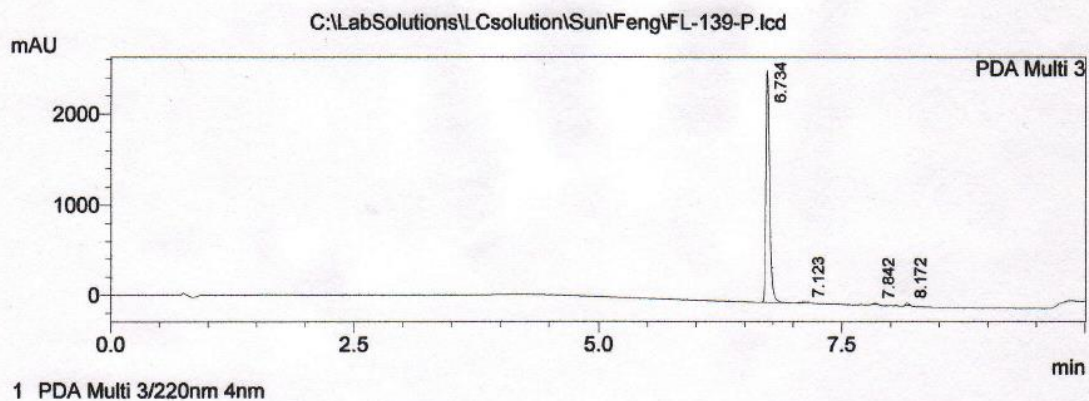

PeakTable

PDA Ch3 220nm 4nm

| Peak# | Ret. Time | Area    | Height  | Area %  | Height % |
|-------|-----------|---------|---------|---------|----------|
| 1     | 6.734     | 6753668 | 2558960 | 97.814  | 98.128   |
| 2     | 7.123     | 59055   | 10437   | 0.855   | 0.400    |
| 3     | 7.842     | 31683   | 11889   | 0.459   | 0.456    |
| 4     | 8.172     | 60211   | 26501   | 0.872   | 1.016    |
| Total |           | 6904617 | 2607788 | 100.000 | 100.000  |

\*The HPLC trace at 254 nm of the product is not shown because of the very weak UV-absorption of the product.

# HRMS of 4b

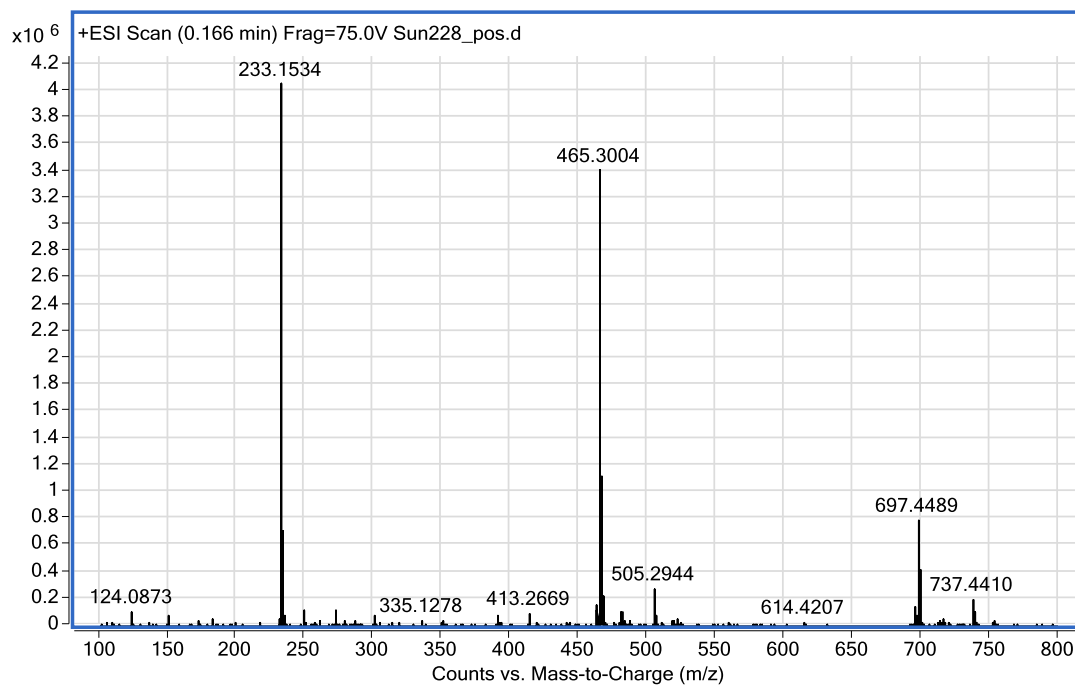

<sup>1</sup>H and <sup>13</sup>C NMR spectra of **4c**

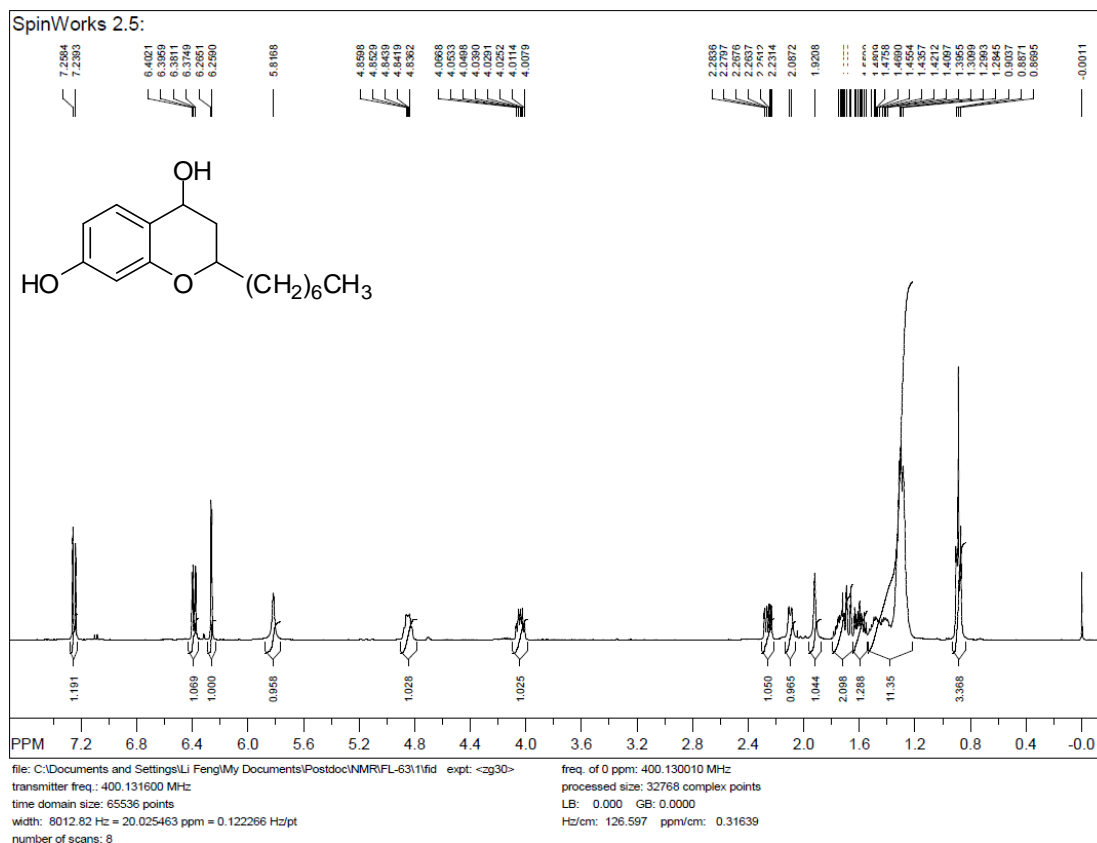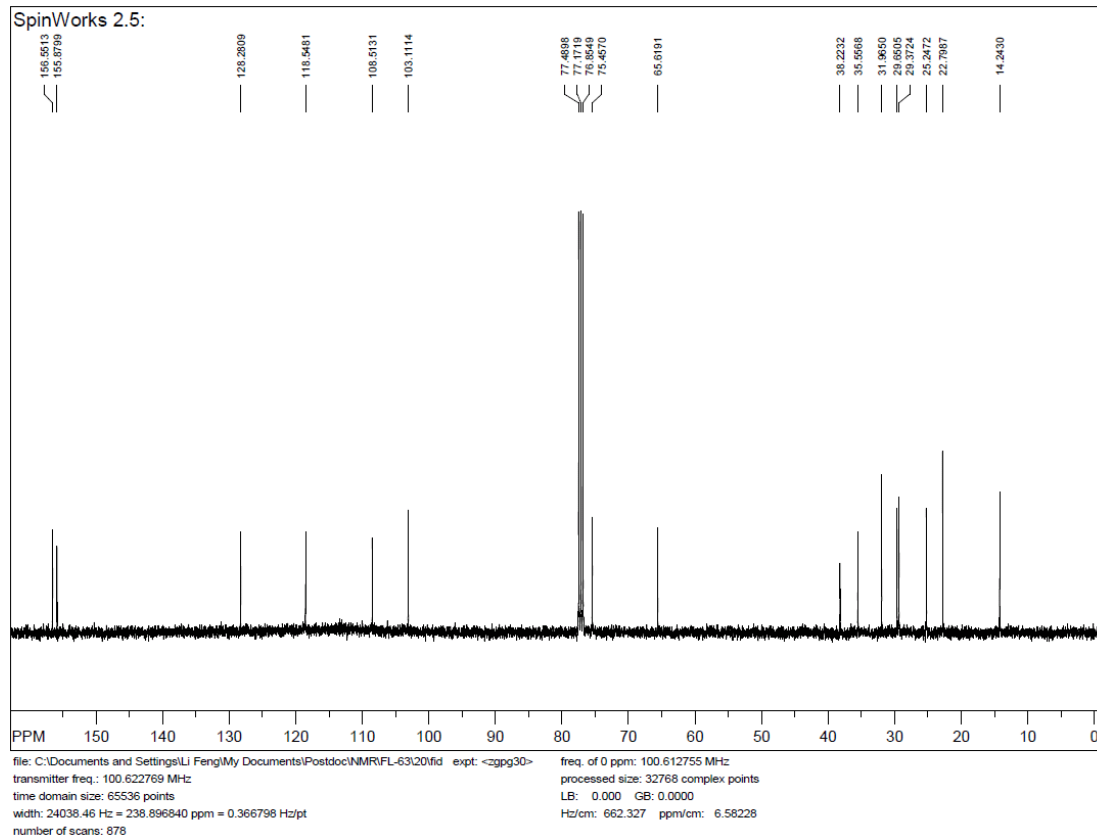

HPLC profile of 4c

==== Shimadzu LCsolution Analysis Report ====

Sample Name : FL-63-P  
Tray# : 1  
Vial # : 91  
Injection Volume : 5 uL  
Data File Name : FL-63-P.lcd  
Method File Name : SDQ gradient.lcm  
Batch File Name :  
Data Acquired : 11/18/2011 9:31:24 AM

C:\LabSolutions\LCsolution\Sun\Feng\FL-63-P.lcd

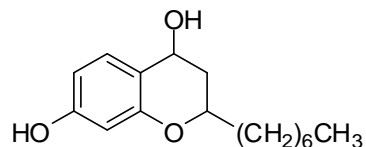

<Chromatogram>

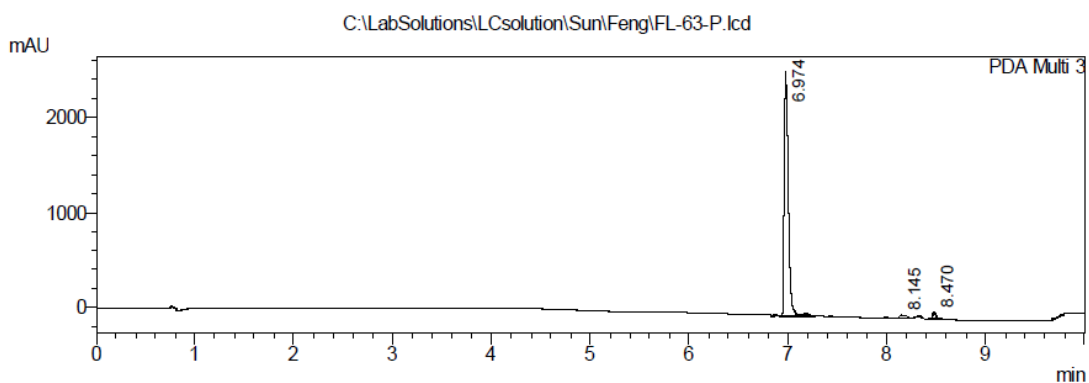

PeakTable

PDA Ch3 220nm 4nm

| Peak# | Ret. Time | Area    | Height  | Area %  | Height % |
|-------|-----------|---------|---------|---------|----------|
| 1     | 6.974     | 6713802 | 2556564 | 95.746  | 96.356   |
| 2     | 8.145     | 117428  | 29492   | 1.675   | 1.112    |
| 3     | 8.470     | 180839  | 67198   | 2.579   | 2.533    |
| Total |           | 7012069 | 2653254 | 100.000 | 100.000  |

\*The HPLC trace at 254 nm of the product is not shown because of the very weak UV-absorption of the product.



# HRMS of 4c

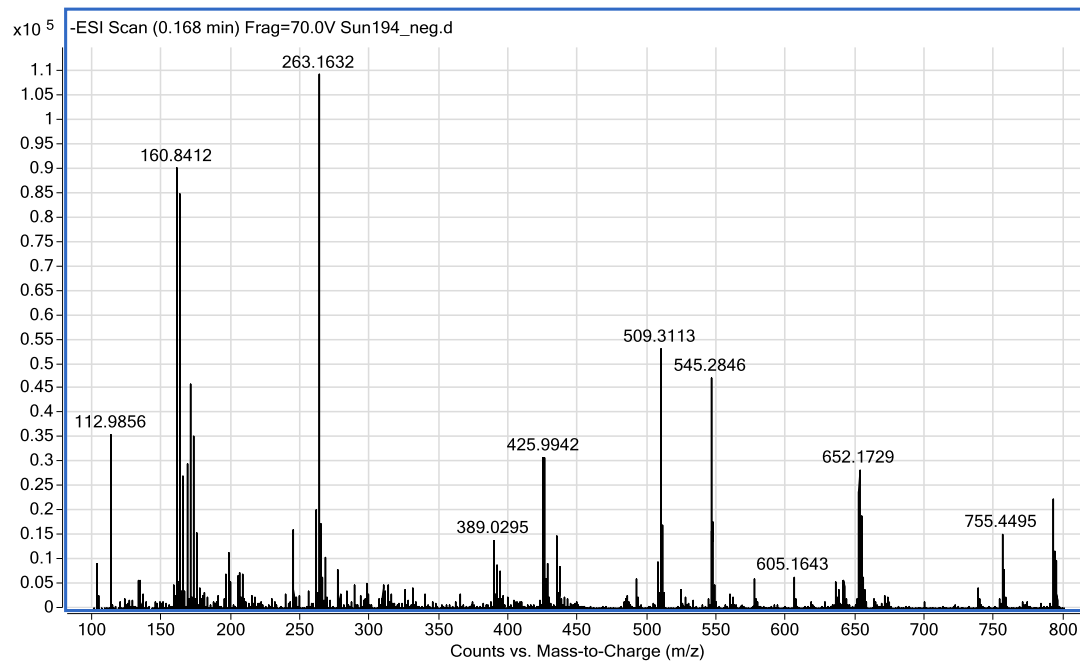

$^1\text{H}$  and  $^{13}\text{C}$  NMR spectra of **4d**

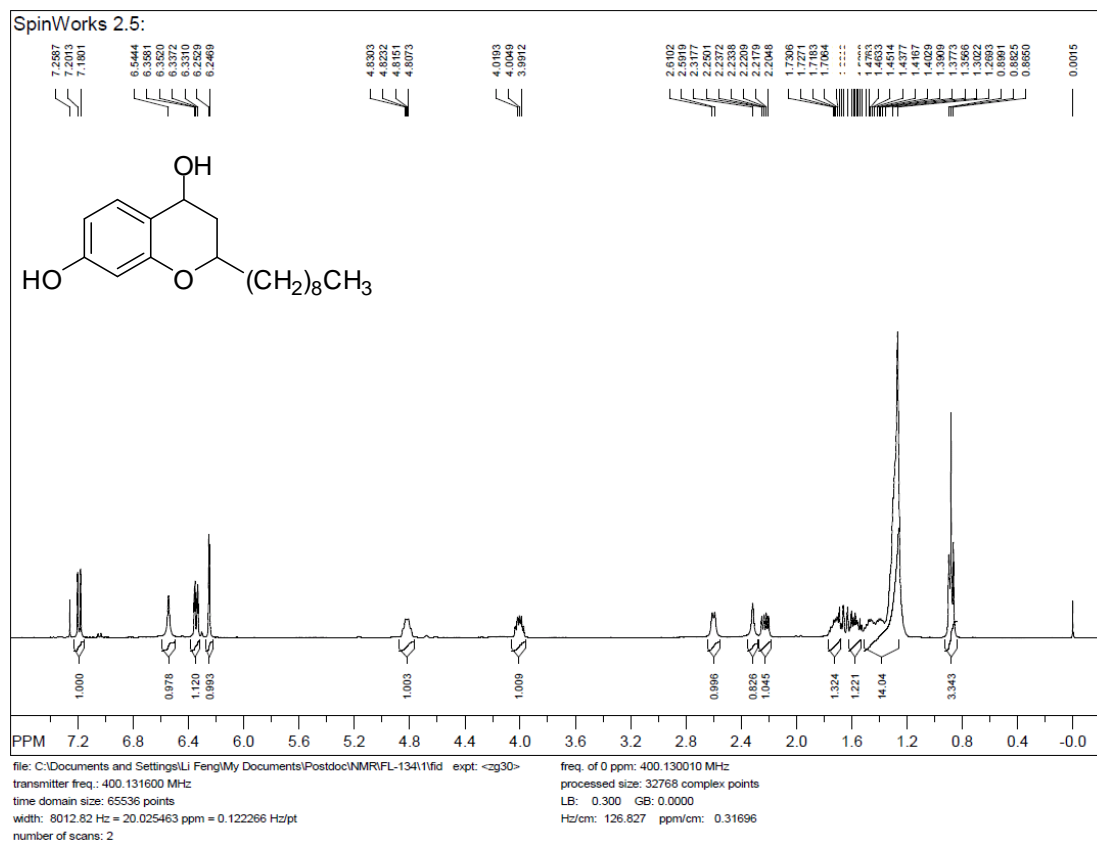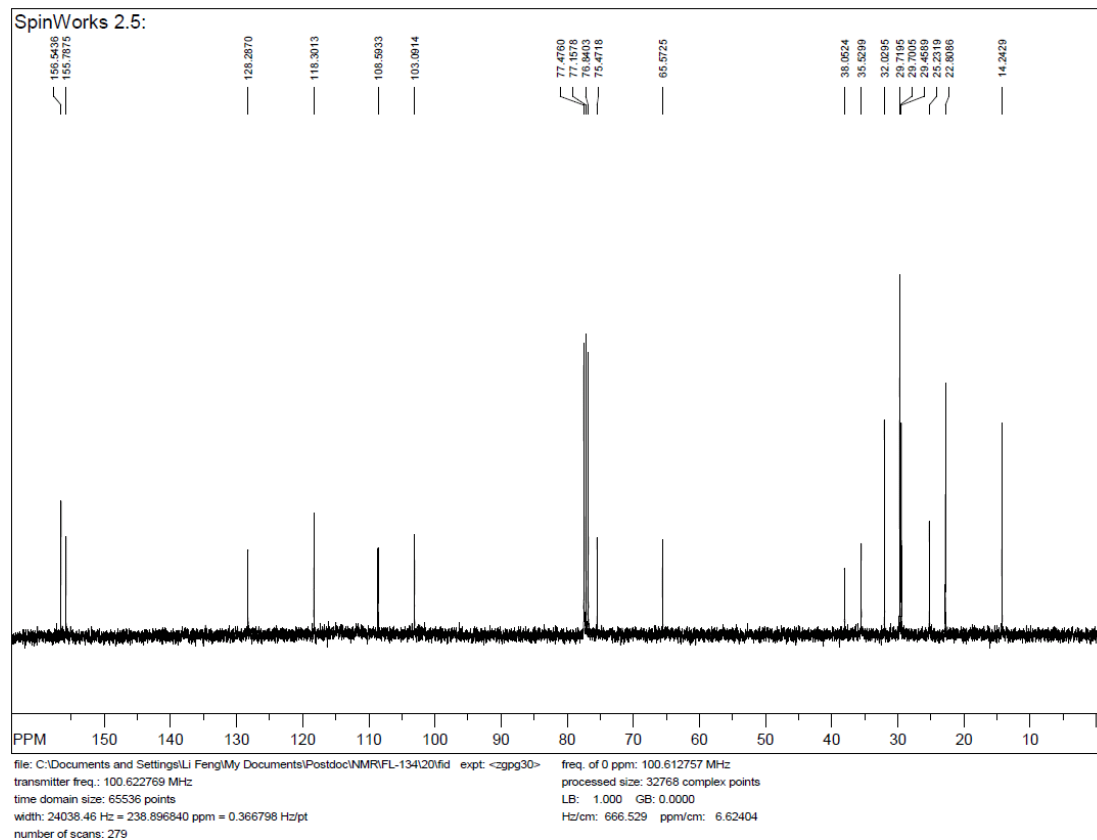

HPLC profile of 4d

==== Shimadzu LCsolution Analysis Report ====

Sample Name : FL-134-P  
Tray# : 1  
Vial # : 91  
Injection Volume : 20 uL  
Data File Name : FL-134-P.lcd  
Method File Name : SDQ gradient.lcm  
Batch File Name :  
Data Acquired : 2/3/2012 2:21:54 PM

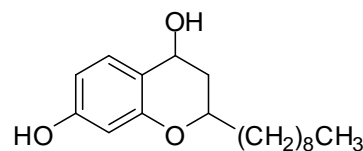

<Chromatogram>

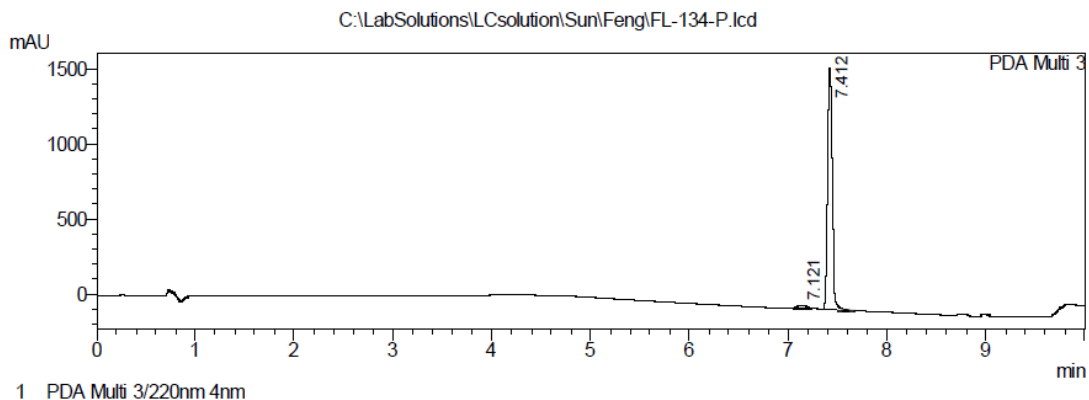

PeakTable

PDA Ch3 220nm 4nm

| Peak# | Ret. Time | Area    | Height  | Area %  | Height % |
|-------|-----------|---------|---------|---------|----------|
| 1     | 7.121     | 116882  | 23087   | 2.295   | 1.416    |
| 2     | 7.412     | 4976957 | 1607200 | 97.705  | 98.584   |
| Total |           | 5093839 | 1630287 | 100.000 | 100.000  |

\*The HPLC trace at 254 nm of the product is not shown because of the very weak UV-absorption of the product.

# HRMS of 4d

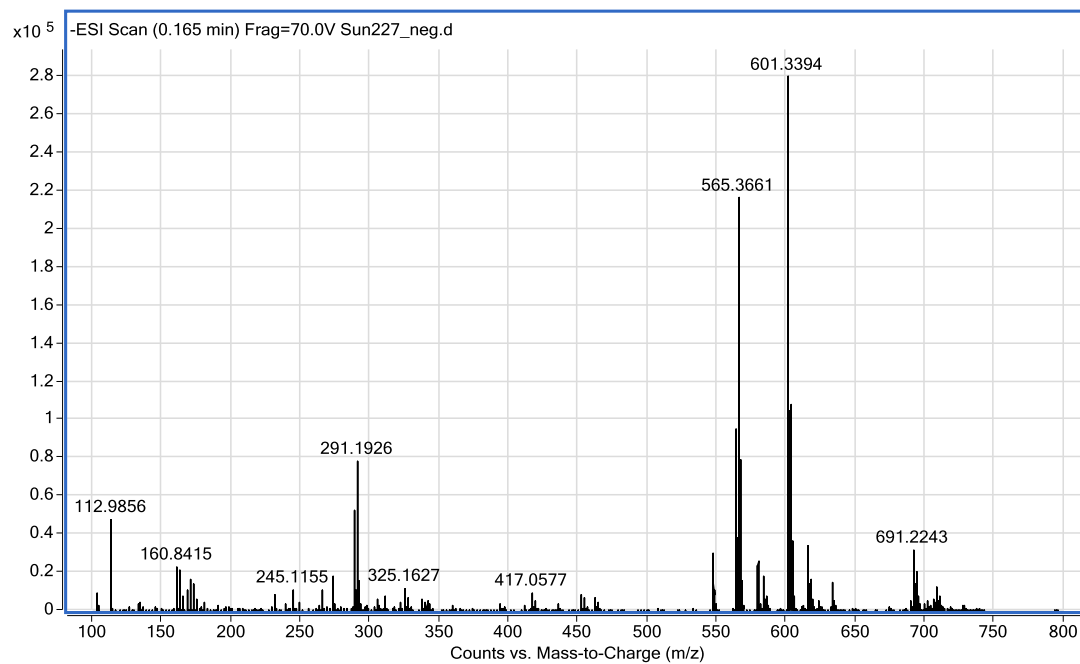

<sup>1</sup>H and <sup>13</sup>C NMR spectra of **5a**

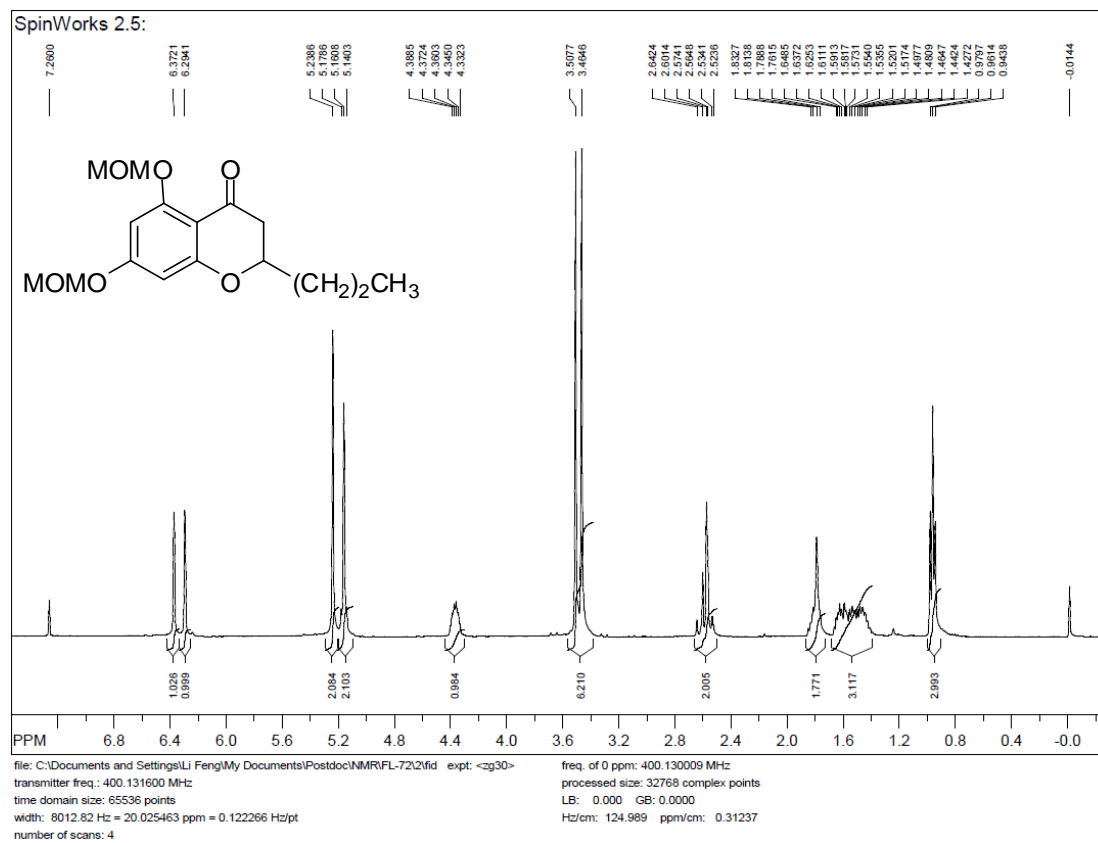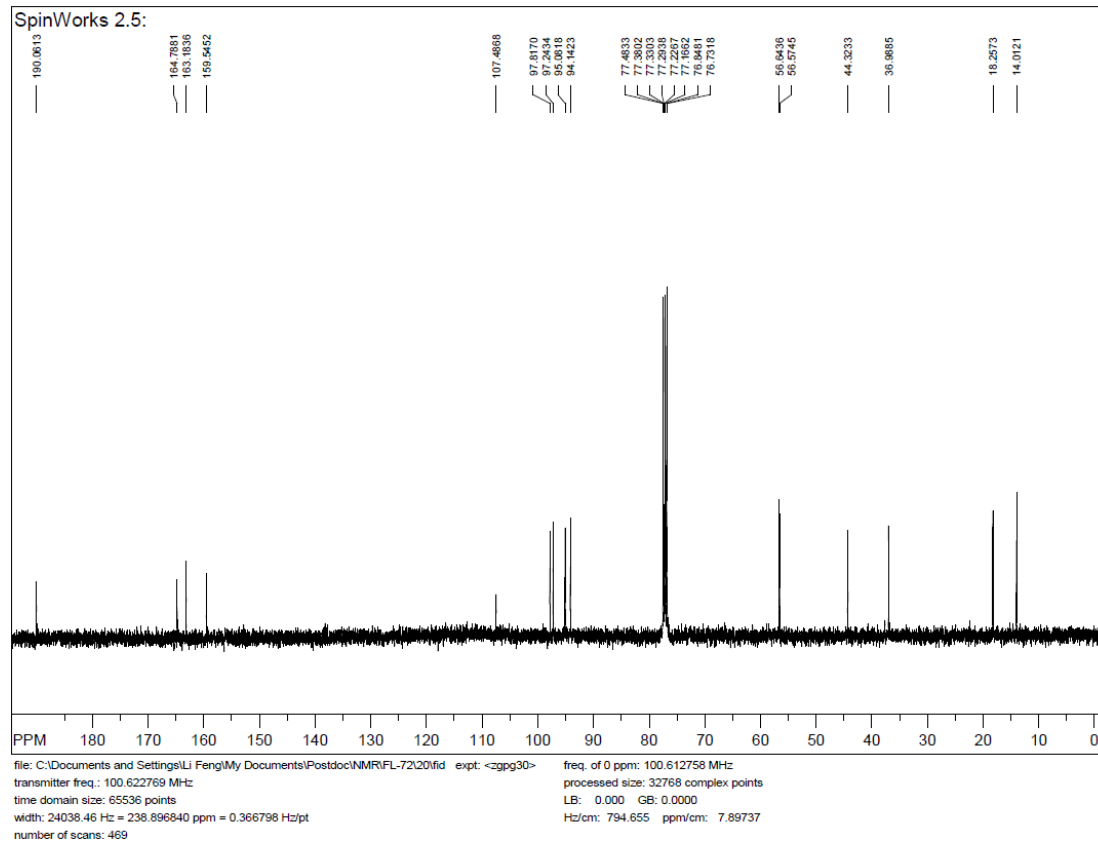

==== Shimadzu LCsolution Analysis Report ====

Sample Name : FL-72-P  
 Tray# : 1  
 Vial # : 91  
 Injection Volume : 5 uL  
 Data File Name : FL-72-P.lcd  
 Method File Name : SDQ gradient.lcm  
 Batch File Name :  
 Data Acquired : 11/28/2011 12:56:43 PM

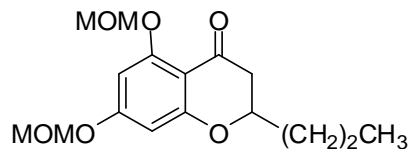

<Chromatogram>

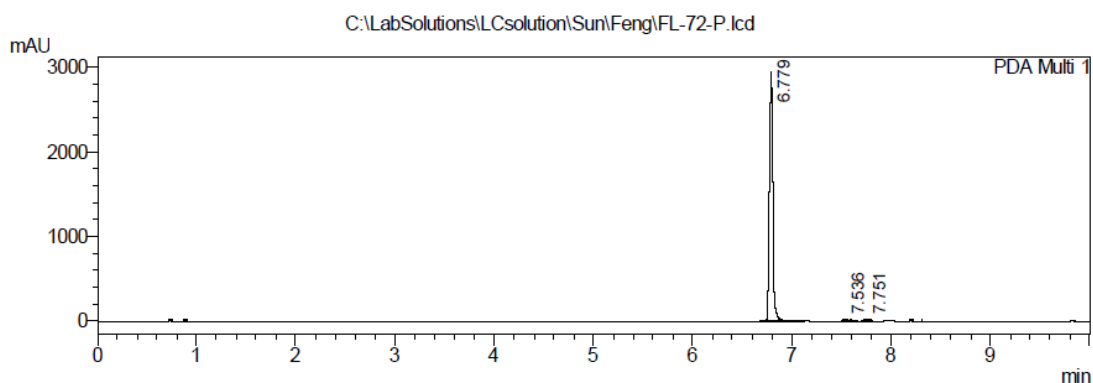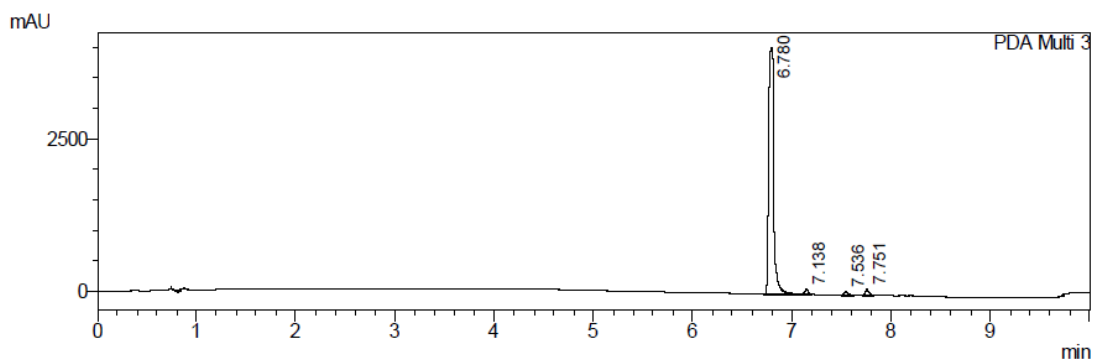

- 1 PDA Multi 1/254nm 4nm
- 2 PDA Multi 3/220nm 4nm

PeakTable

PDA Ch1 254nm 4nm

| Peak# | Ret. Time | Area    | Height  | Area %  | Height % |
|-------|-----------|---------|---------|---------|----------|
| 1     | 6.779     | 6987339 | 2913639 | 97.961  | 98.465   |
| 2     | 7.536     | 91645   | 22337   | 1.285   | 0.755    |
| 3     | 7.751     | 53777   | 23096   | 0.754   | 0.781    |
| Total |           | 7132762 | 2959071 | 100.000 | 100.000  |

PeakTable

PDA Ch3 220nm 4nm

| Peak# | Ret. Time | Area     | Height  | Area %  | Height % |
|-------|-----------|----------|---------|---------|----------|
| 1     | 6.780     | 14459718 | 4034386 | 96.255  | 94.390   |
| 2     | 7.138     | 182246   | 78697   | 1.213   | 1.841    |
| 3     | 7.536     | 149550   | 60636   | 0.996   | 1.419    |
| 4     | 7.751     | 230810   | 100458  | 1.536   | 2.350    |
| Total |           | 15022323 | 4274175 | 100.000 | 100.000  |

# HRMS of 5a

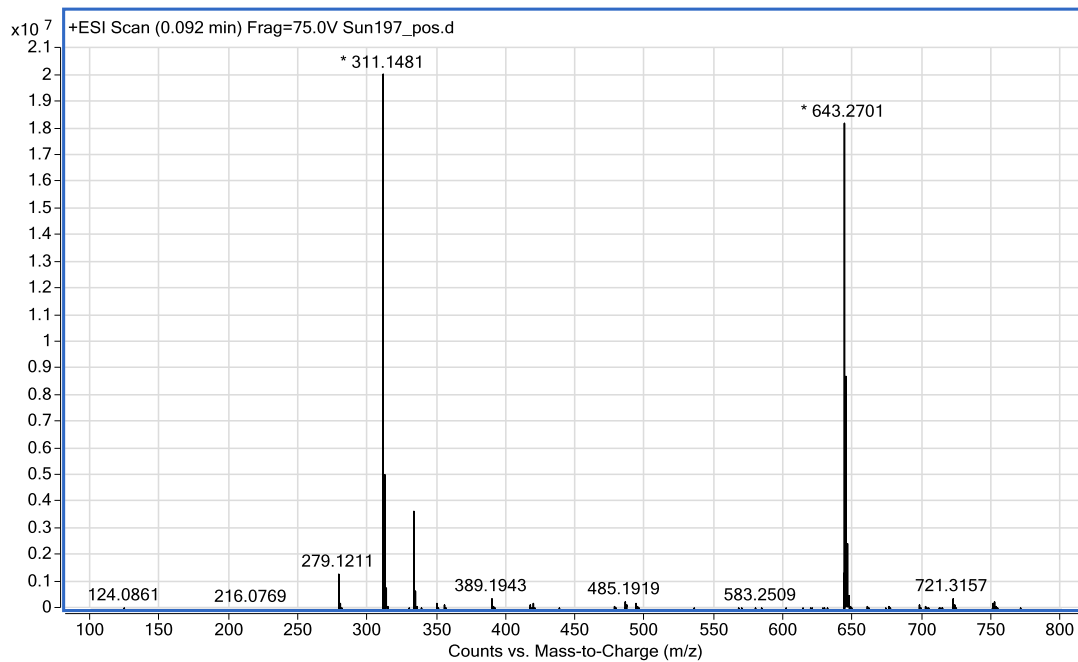

$^1\text{H}$  and  $^{13}\text{C}$  NMR spectra of **5b**

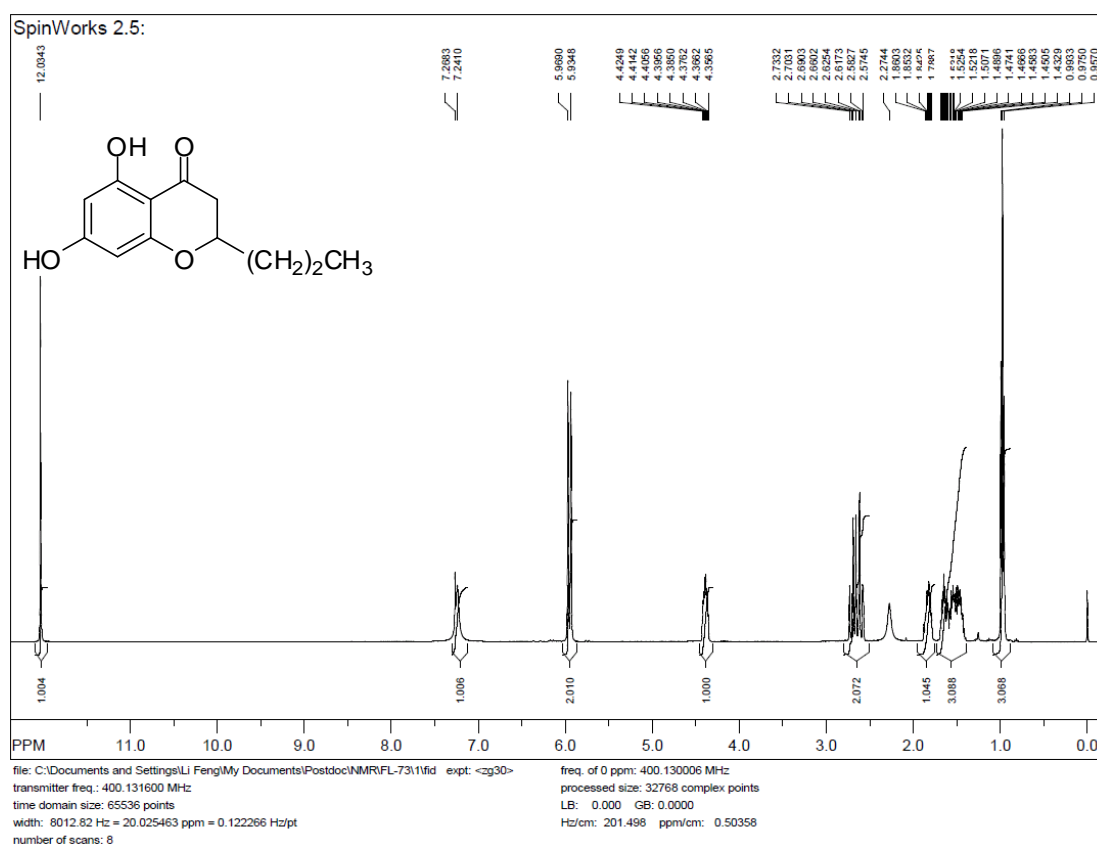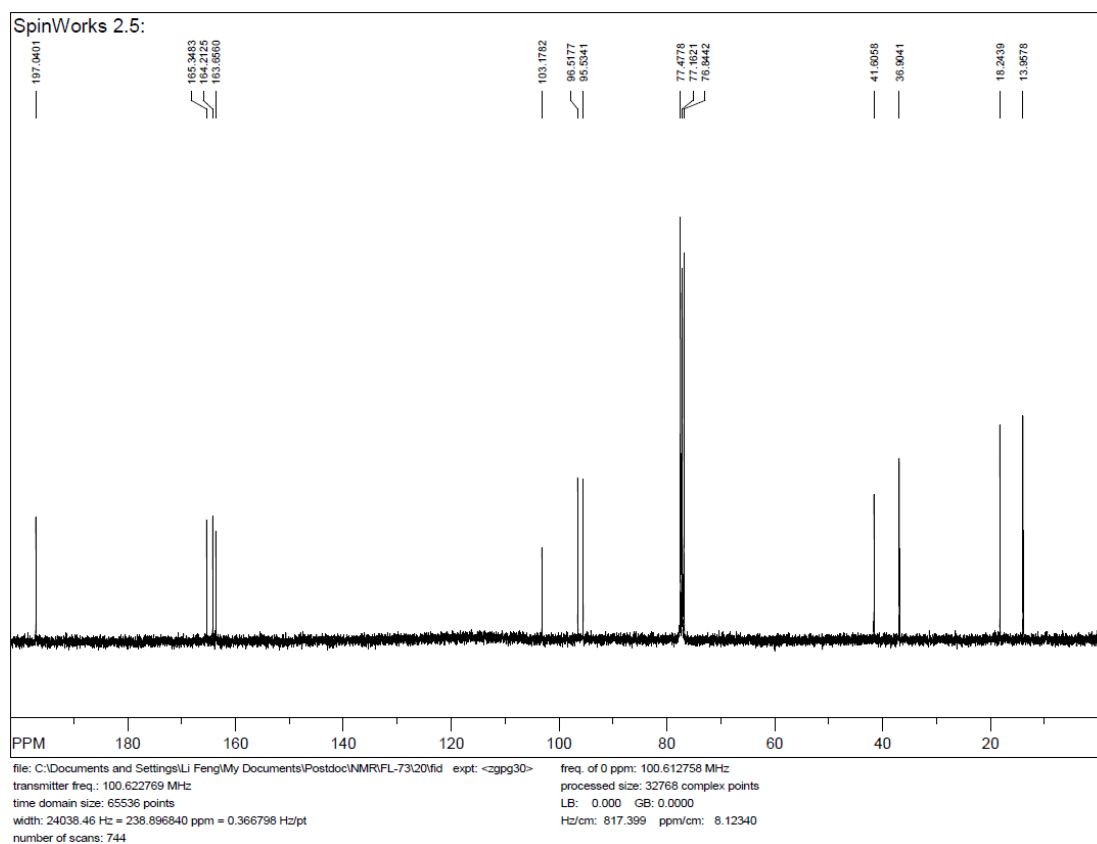



HPLC profile of 5b

==== Shimadzu LCsolution Analysis Report ====

Sample Name : FL-73-P  
 Tray# : 1  
 Vial # : 91  
 Injection Volume : 4 uL  
 Data File Name : FL-73-P.lcd  
 Method File Name : SDQ gradient.lcm  
 Batch File Name :  
 Data Acquired : 11/28/2011 1:58:09 PM

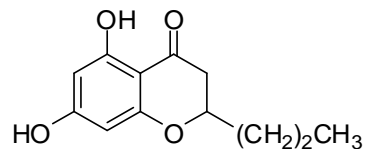

<Chromatogram>

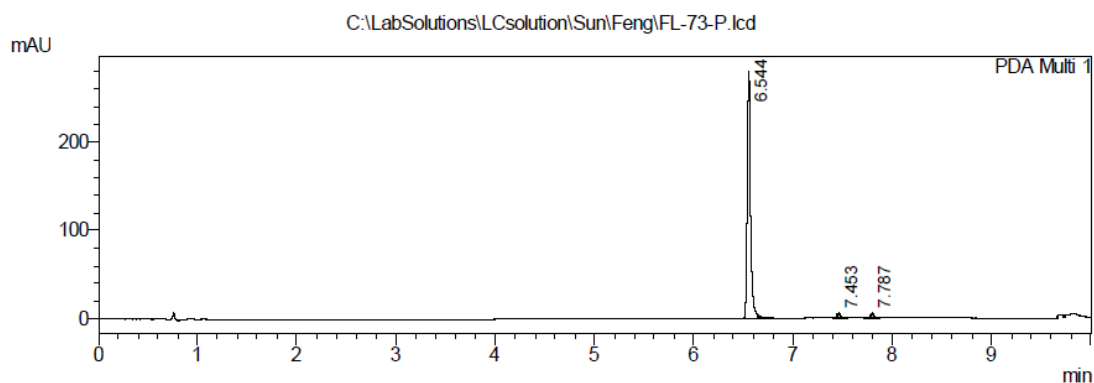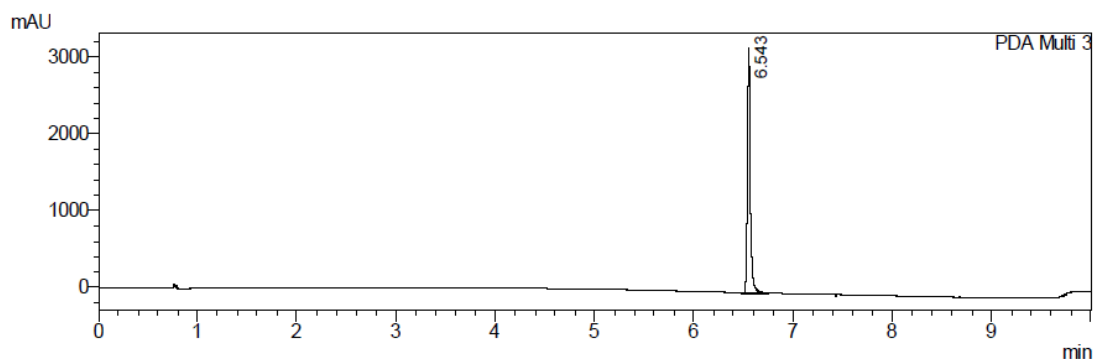

- 1 PDA Multi 1/254nm 4nm
- 2 PDA Multi 3/220nm 4nm

PeakTable

PDA Ch1 254nm 4nm

| Peak# | Ret. Time | Area   | Height | Area %  | Height % |
|-------|-----------|--------|--------|---------|----------|
| 1     | 6.544     | 724978 | 271529 | 96.722  | 96.436   |
| 2     | 7.453     | 13660  | 5212   | 1.822   | 1.851    |
| 3     | 7.787     | 10910  | 4822   | 1.456   | 1.713    |
| Total |           | 749548 | 281563 | 100.000 | 100.000  |

PeakTable

PDA Ch3 220nm 4nm

| Peak# | Ret. Time | Area    | Height  | Area %  | Height % |
|-------|-----------|---------|---------|---------|----------|
| 1     | 6.543     | 7072564 | 3186261 | 100.000 | 100.000  |
| Total |           | 7072564 | 3186261 | 100.000 | 100.000  |

# HRMS of 5b

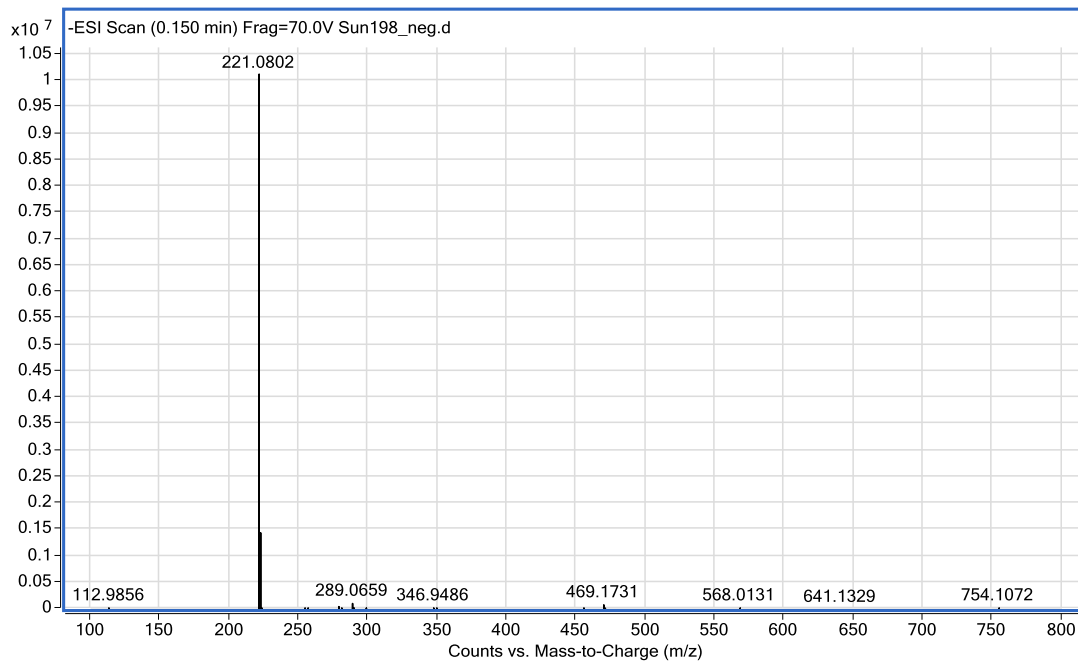

<sup>1</sup>H and <sup>13</sup>C NMR spectra of **5c**

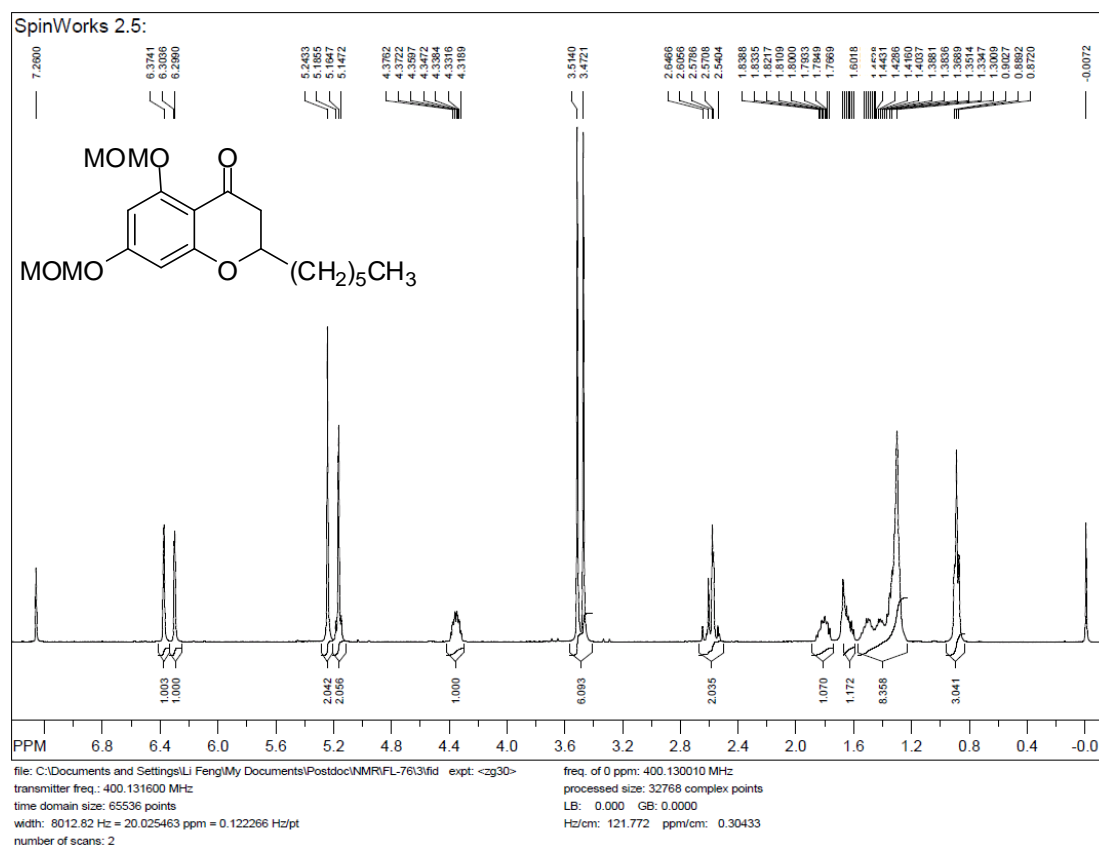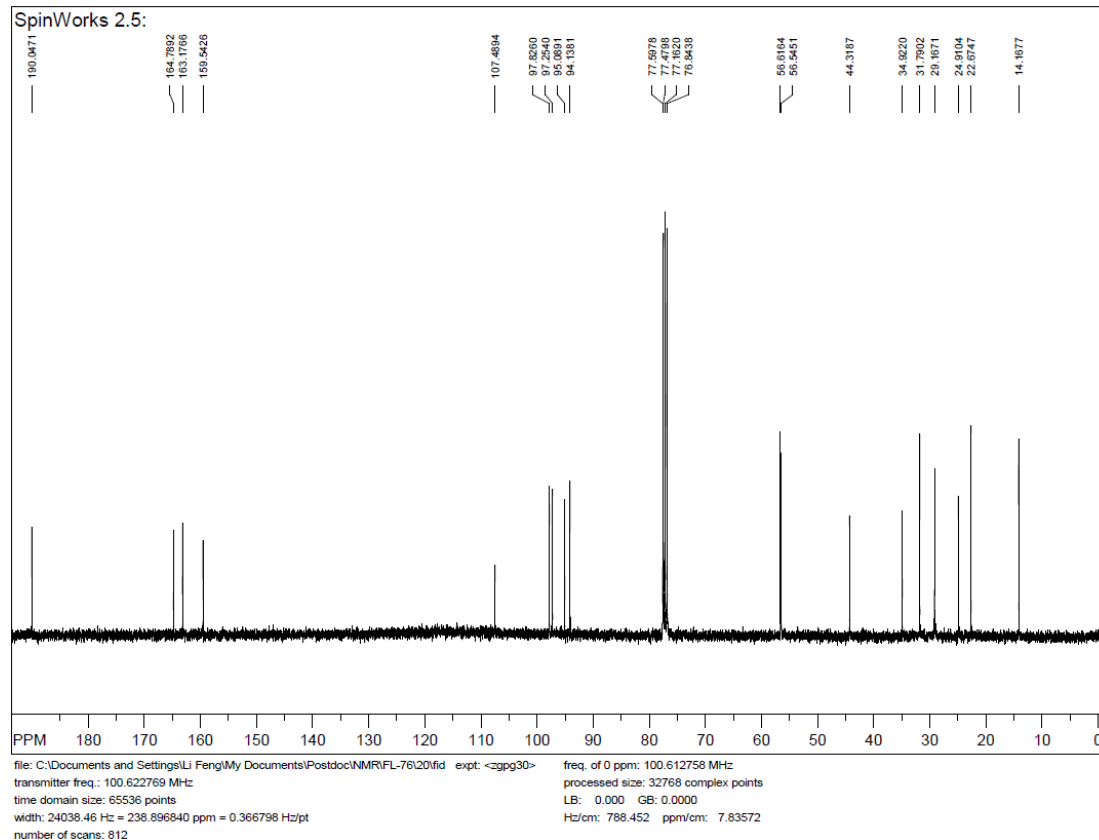

HPLC profile of 5c

==== Shimadzu LCsolution Analysis Report ====

Sample Name : FL-76-P  
 Tray# : 1  
 Vial # : 91  
 Injection Volume : 4 uL  
 Data File Name : FL-76-P.lcd  
 Method File Name : SDQ gradient.lcm  
 Batch File Name : Batch 1.lcb  
 Data Acquired : 11/30/2011 2:32:44 PM

C:\LabSolutions\LCsolution\Sun\Feng\FL-76-P.lcd

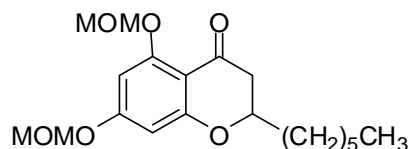

<Chromatogram>

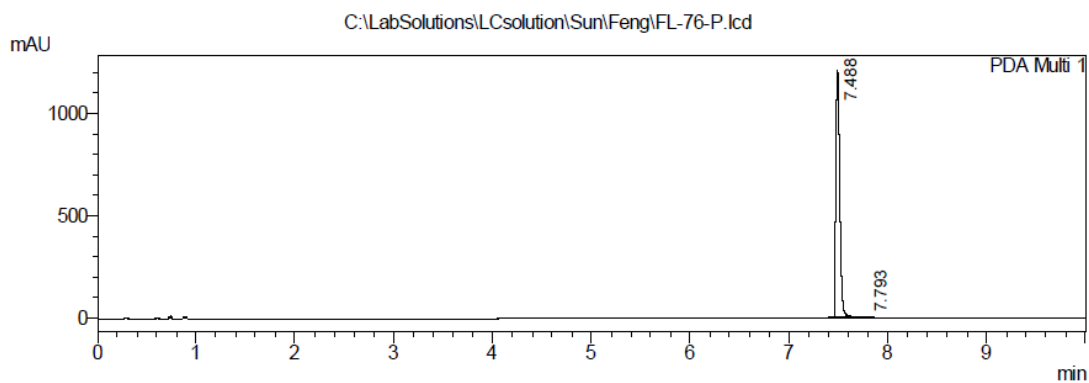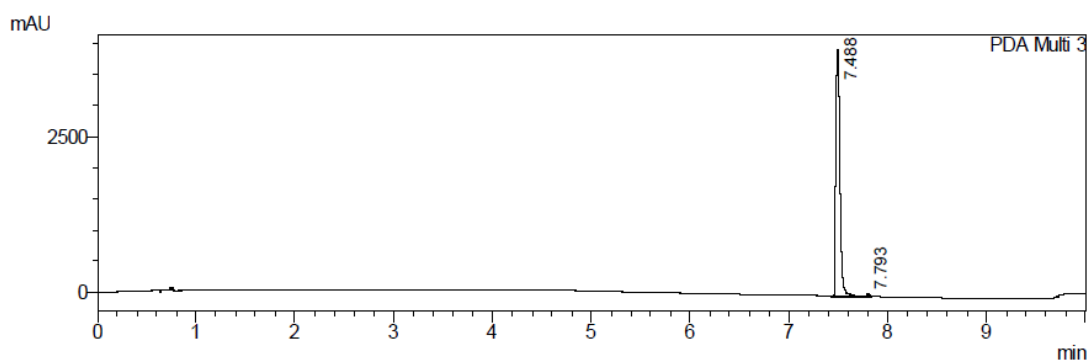

- 1 PDA Multi 1/254nm 4nm
- 2 PDA Multi 3/220nm 4nm

PeakTable

PDA Ch1 254nm 4nm

| Peak# | Ret. Time | Area    | Height  | Area %  | Height % |
|-------|-----------|---------|---------|---------|----------|
| 1     | 7.488     | 3031043 | 1173781 | 99.515  | 99.480   |
| 2     | 7.793     | 14779   | 6139    | 0.485   | 0.520    |
| Total |           | 3045821 | 1179920 | 100.000 | 100.000  |

PeakTable

PDA Ch3 220nm 4nm

| Peak# | Ret. Time | Area     | Height  | Area %  | Height % |
|-------|-----------|----------|---------|---------|----------|
| 1     | 7.488     | 10532044 | 3965245 | 99.289  | 99.075   |
| 2     | 7.793     | 75417    | 37026   | 0.711   | 0.925    |
| Total |           | 10607461 | 4002271 | 100.000 | 100.000  |

# HRMS of 5c

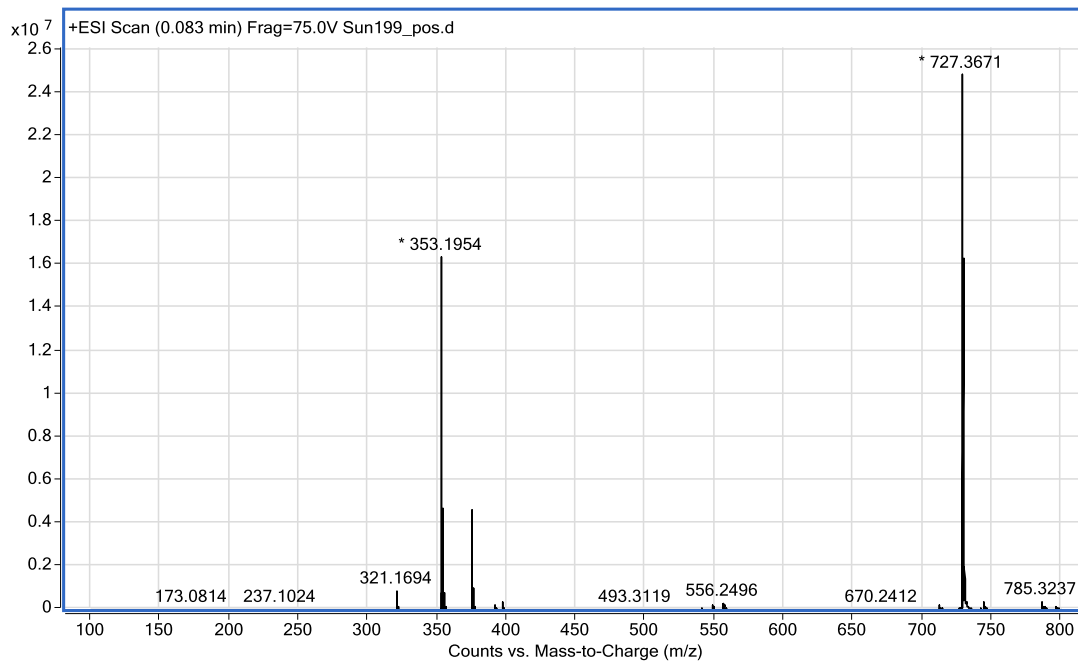

<sup>1</sup>H and <sup>13</sup>C NMR spectra of **5d**

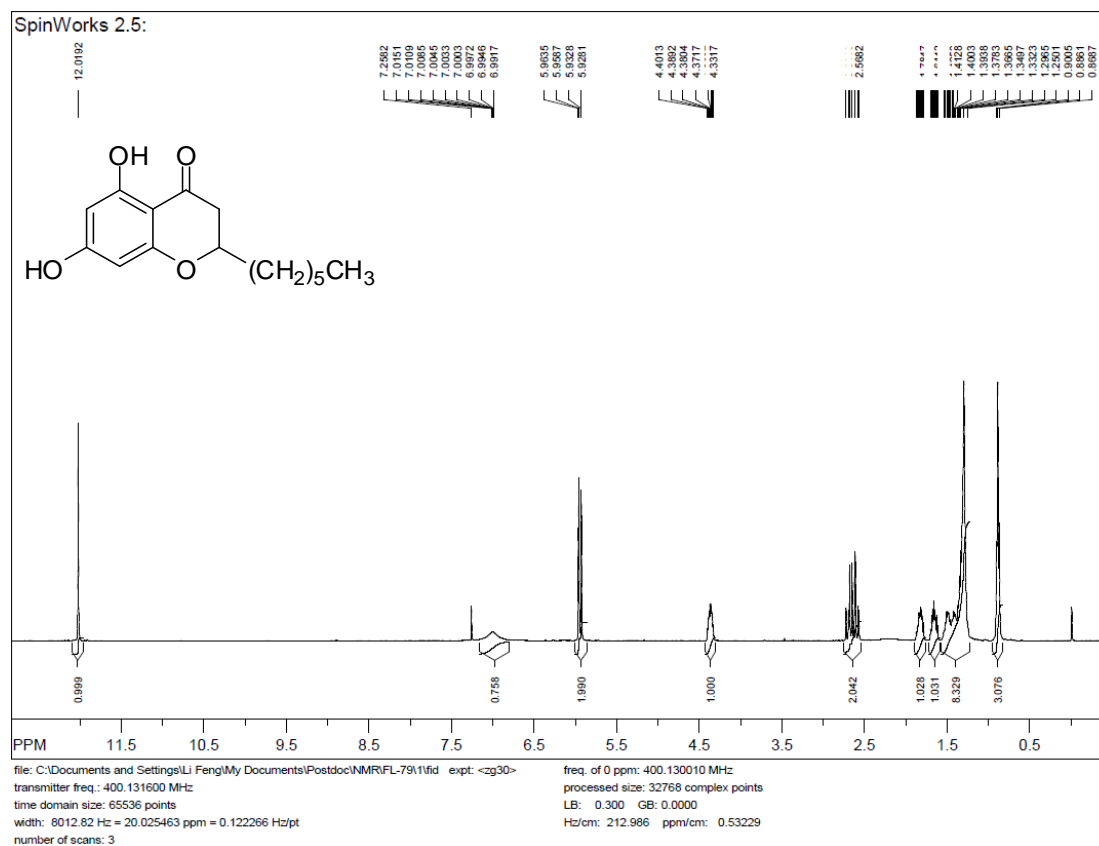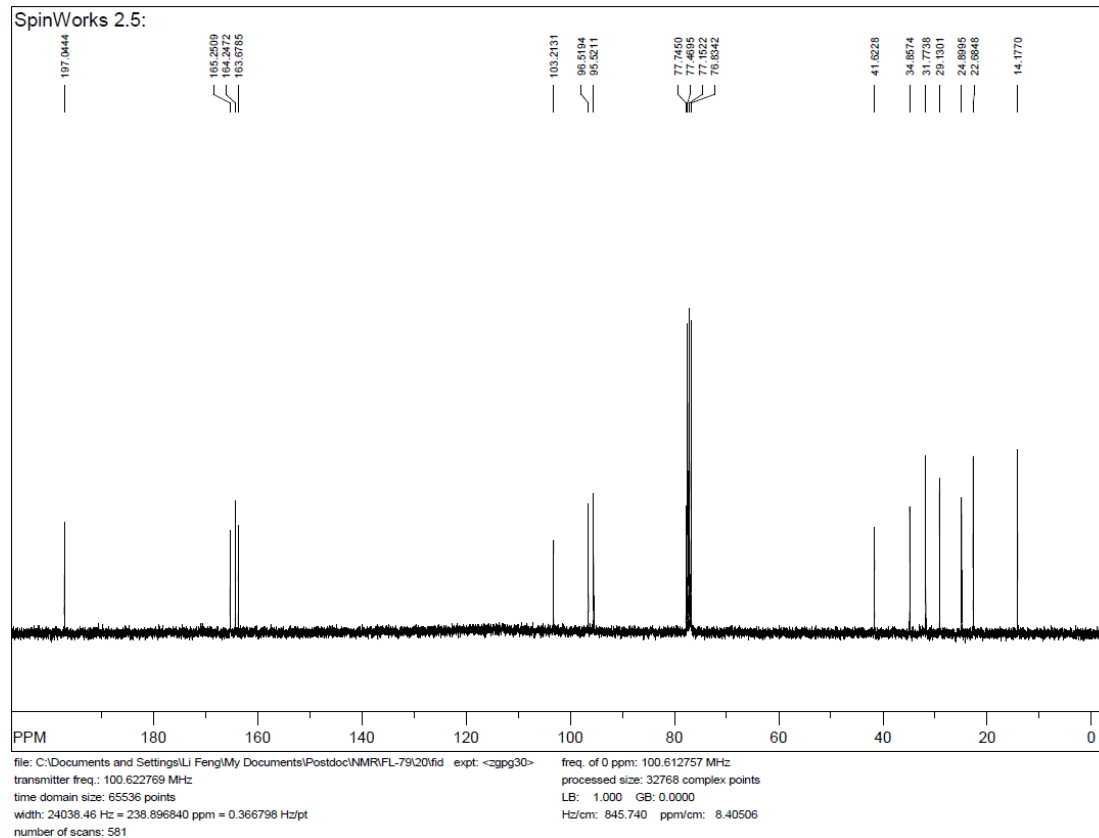

HPLC profile of **5d**

==== Shimadzu LCsolution Analysis Report ====

Sample Name : FL-79-P  
 Tray# : 1  
 Vial # : 91  
 Injection Volume : 8 uL  
 Data File Name : FL-79-P.lcd  
 Method File Name : SDQ gradient.lcm  
 Batch File Name :  
 Data Acquired : 12/1/2011 11:22:33 AM

C:\LabSolutions\LCsolution\Sun\Feng\FL-79-P.lcd

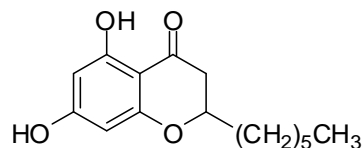

<Chromatogram>

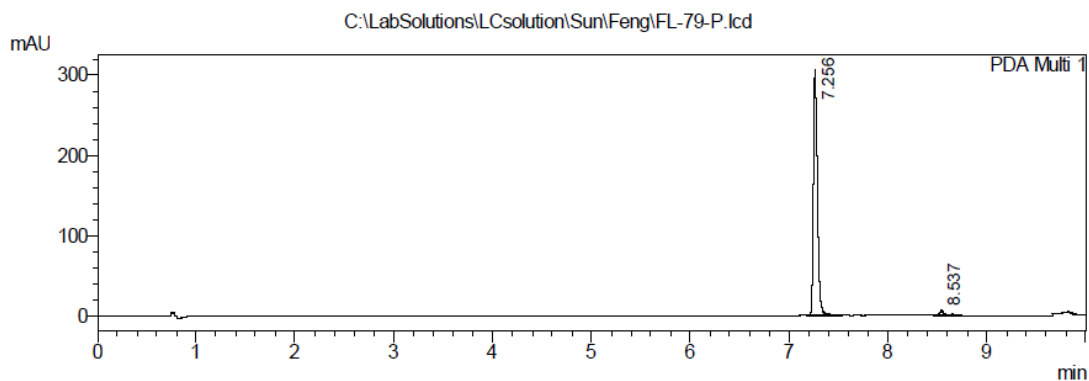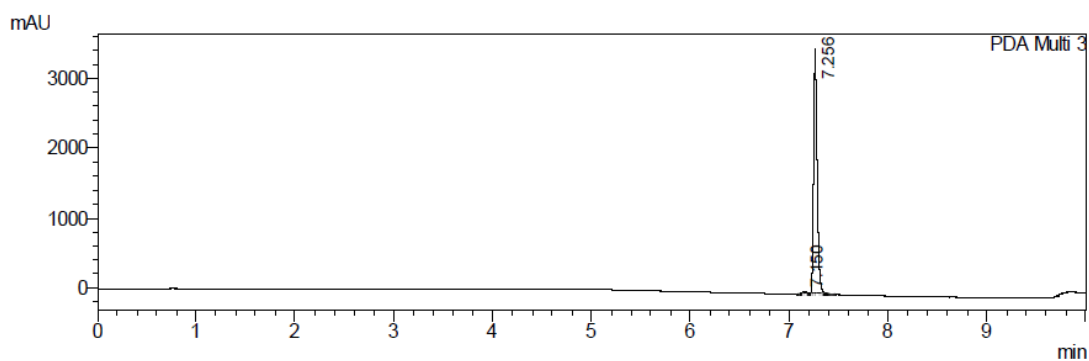

- 1 PDA Multi 1/254nm 4nm
- 2 PDA Multi 3/220nm 4nm

PeakTable

PDA Ch1 254nm 4nm

| Peak# | Ret. Time | Area   | Height | Area %  | Height % |
|-------|-----------|--------|--------|---------|----------|
| 1     | 7.256     | 766277 | 294534 | 97.854  | 98.234   |
| 2     | 8.537     | 16808  | 5295   | 2.146   | 1.766    |
| Total |           | 783086 | 299829 | 100.000 | 100.000  |

PeakTable

PDA Ch3 220nm 4nm

| Peak# | Ret. Time | Area    | Height  | Area %  | Height % |
|-------|-----------|---------|---------|---------|----------|
| 1     | 7.150     | 67014   | 23159   | 0.857   | 0.657    |
| 2     | 7.256     | 7752668 | 3500378 | 99.143  | 99.343   |
| Total |           | 7819682 | 3523536 | 100.000 | 100.000  |

# HRMS of 5d

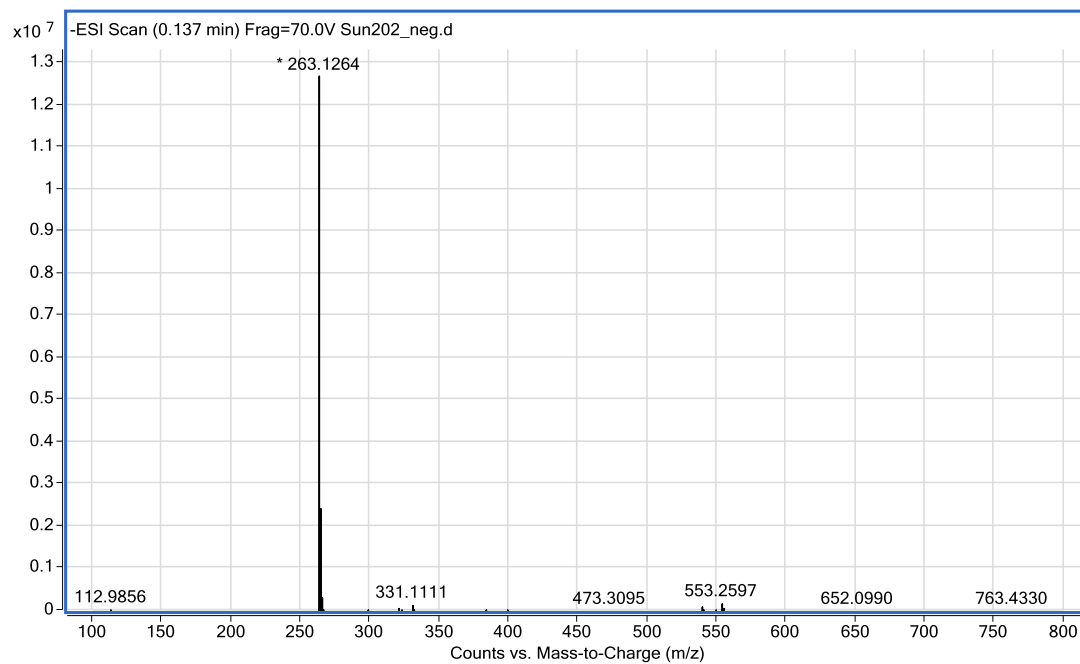



$^1\text{H}$  and  $^{13}\text{C}$  NMR spectra of **5e**

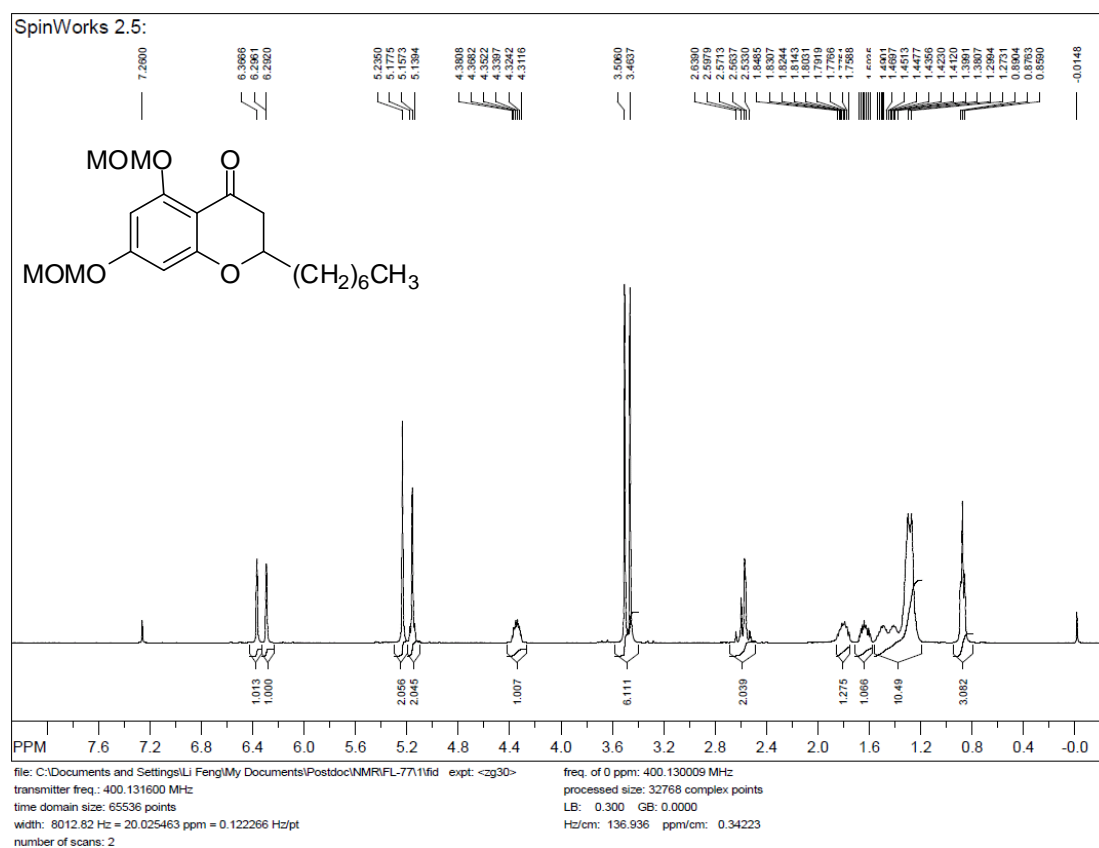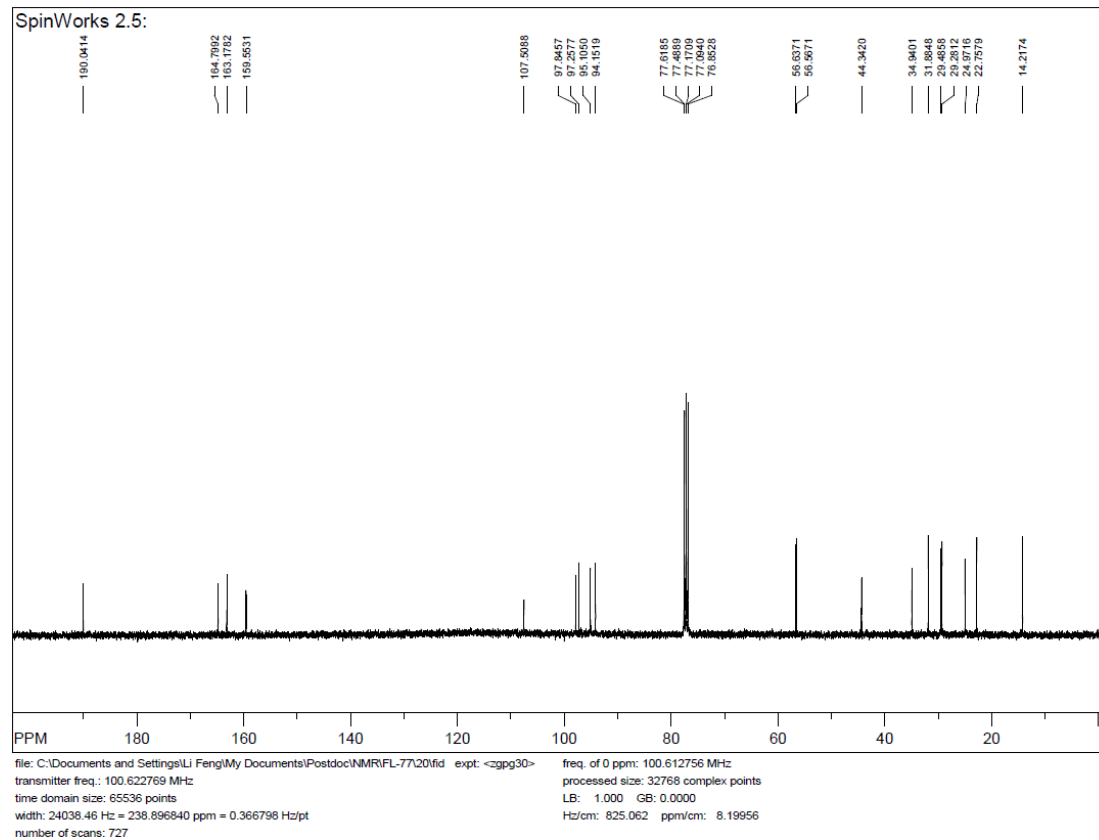

HPLC profile of 5e

==== Shimadzu LCsolution Analysis Report ====

Sample Name : FL-77-P  
 Tray# : 1  
 Vial # : 92  
 Injection Volume : 4 uL  
 Data File Name : FL-77-P.lcd  
 Method File Name : SDQ gradient.lcm  
 Batch File Name : Batch 1.lcb  
 Data Acquired : 11/30/2011 2:43:11 PM

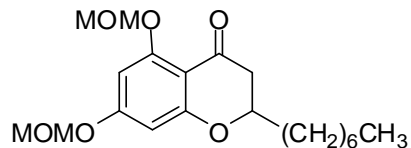

<Chromatogram>

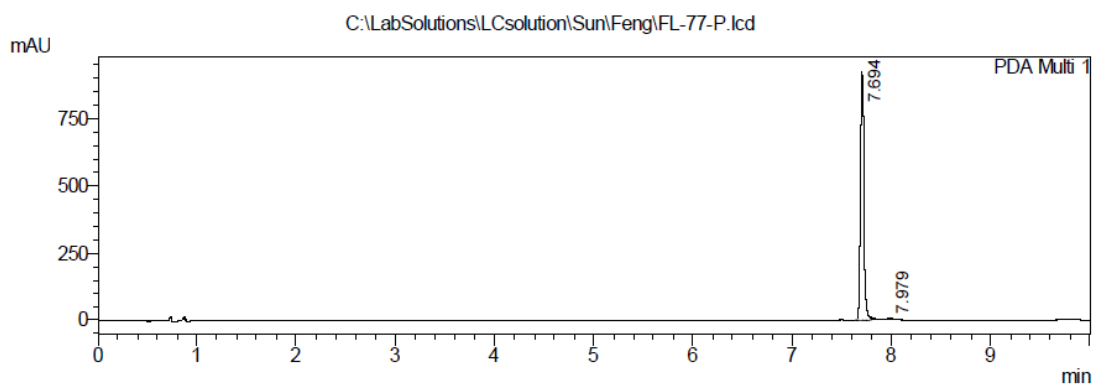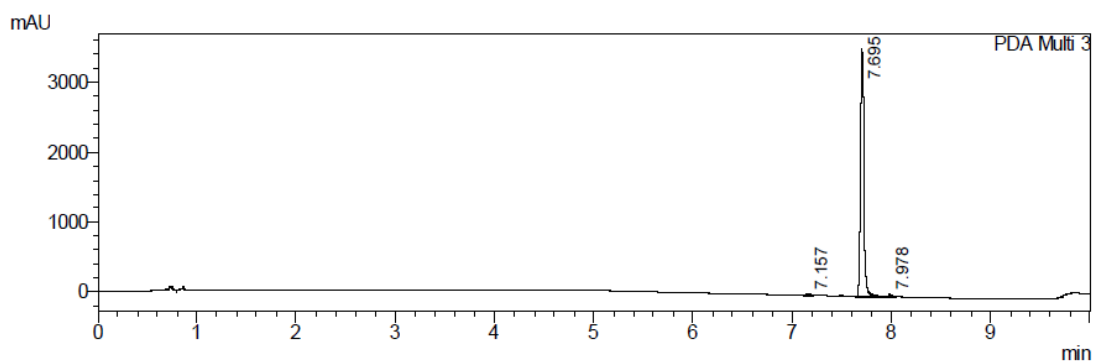

- 1 PDA Multi 1/254nm 4nm
- 2 PDA Multi 3/220nm 4nm

PeakTable

PDA Ch1 254nm 4nm

| Peak# | Ret. Time | Area    | Height | Area %  | Height % |
|-------|-----------|---------|--------|---------|----------|
| 1     | 7.694     | 2303744 | 907685 | 99.648  | 99.525   |
| 2     | 7.979     | 8142    | 4330   | 0.352   | 0.475    |
| Total |           | 2311886 | 912015 | 100.000 | 100.000  |

PeakTable

PDA Ch3 220nm 4nm

| Peak# | Ret. Time | Area    | Height  | Area %  | Height % |
|-------|-----------|---------|---------|---------|----------|
| 1     | 7.157     | 35921   | 13839   | 0.414   | 0.386    |
| 2     | 7.695     | 8571758 | 3542445 | 98.784  | 98.718   |
| 3     | 7.978     | 69571   | 32168   | 0.802   | 0.896    |
| Total |           | 8677249 | 3588452 | 100.000 | 100.000  |

# HRMS of 5e

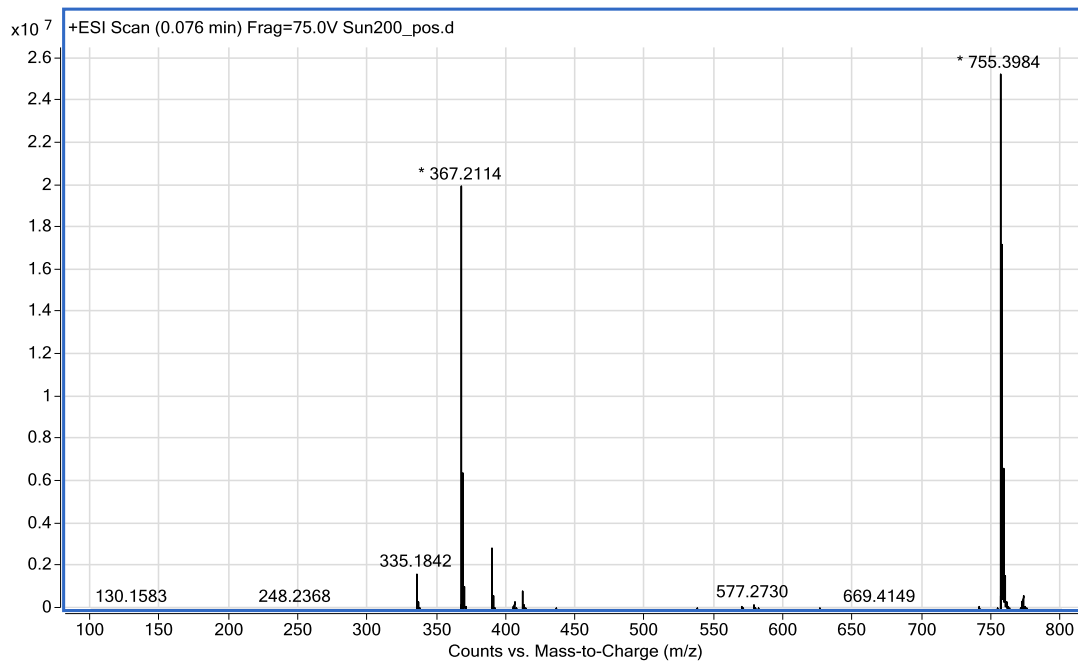

<sup>1</sup>H and <sup>13</sup>C NMR spectra of **5f**

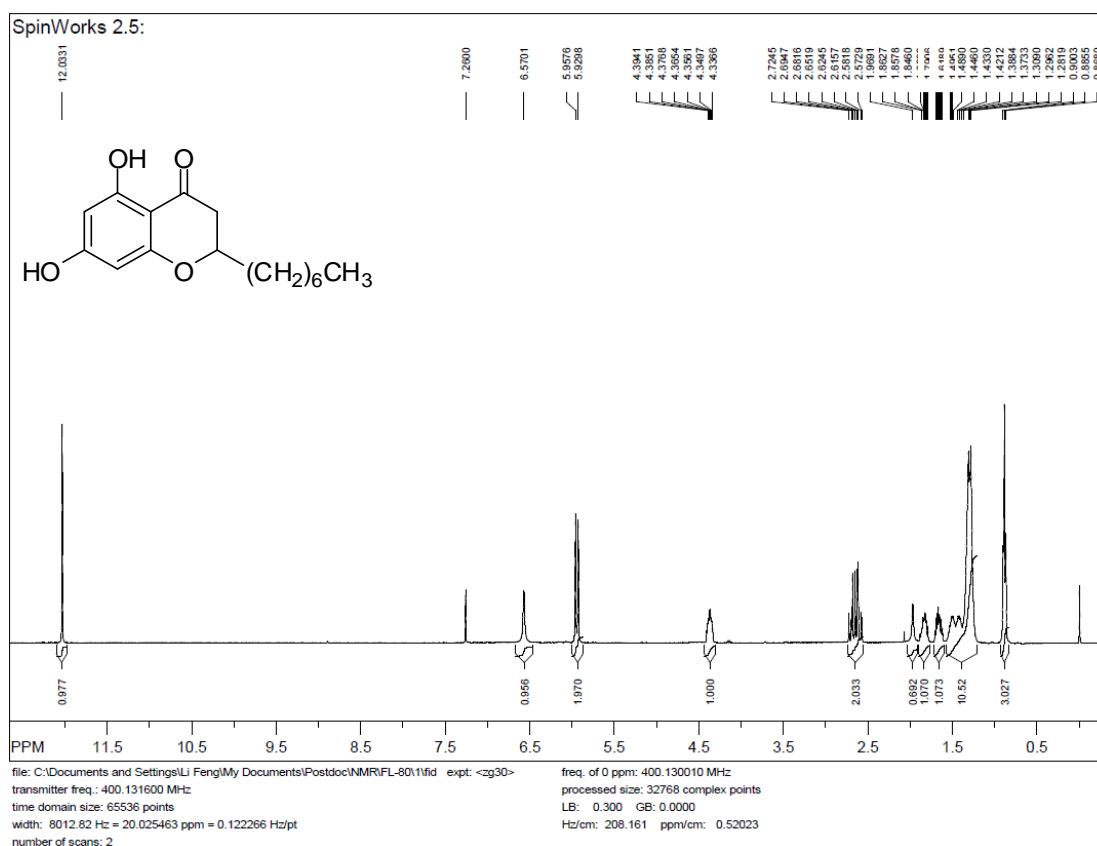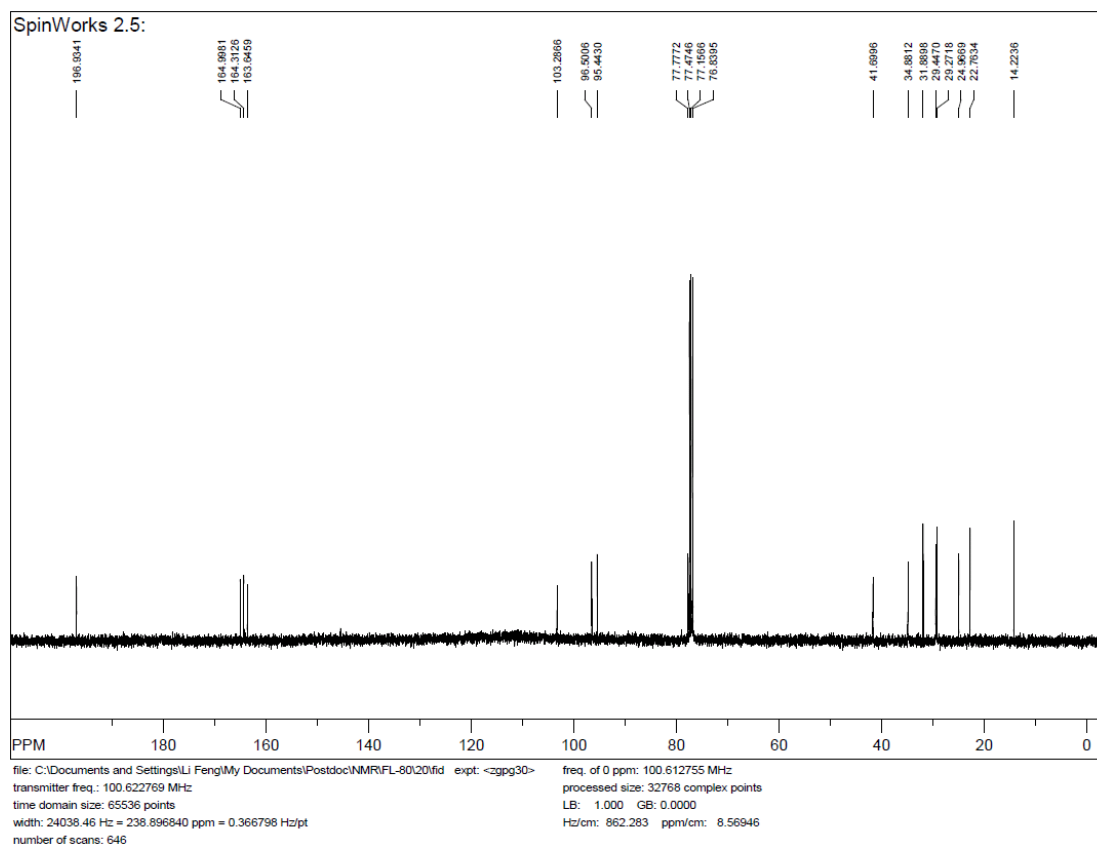

HPLC profile of 5f

==== Shimadzu LCsolution Analysis Report ====

Sample Name : FL-80-P  
 Tray# : 1  
 Vial # : 91  
 Injection Volume : 4 uL  
 Data File Name : FL-80-P.lcd  
 Method File Name : SDQ.gradient.lcm  
 Batch File Name :  
 Data Acquired : 12/2/2011 10:45:41 AM

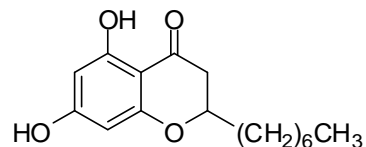

<Chromatogram>

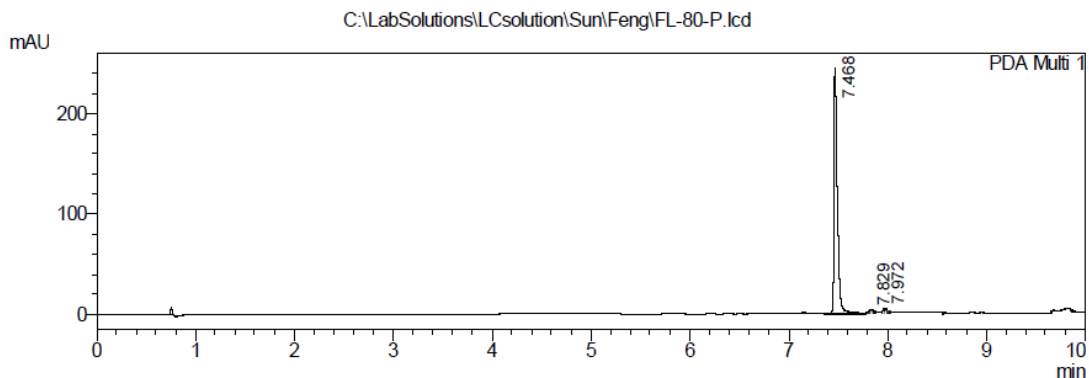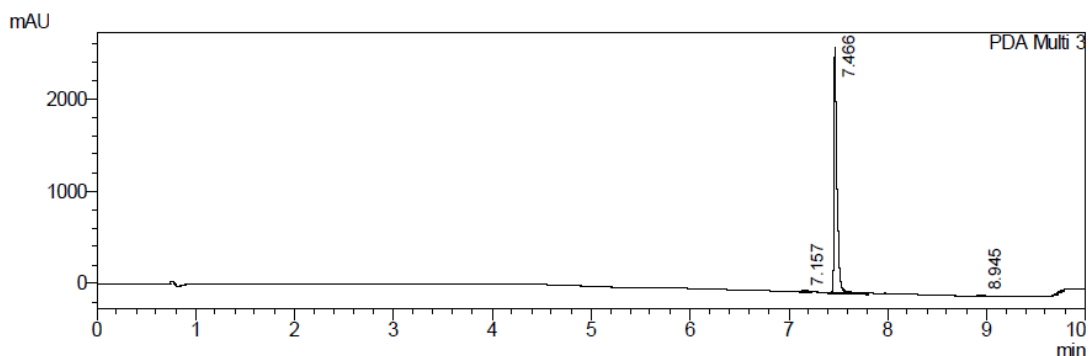

- 1 PDA Multi 1/254nm 4nm
- 2 PDA Multi 3/220nm 4nm

PeakTable

PDA Ch1 254nm 4nm

| Peak# | Ret. Time | Area   | Height | Area %  | Height % |
|-------|-----------|--------|--------|---------|----------|
| 1     | 7.468     | 619604 | 244071 | 98.567  | 98.104   |
| 2     | 7.829     | 2811   | 1628   | 0.447   | 0.654    |
| 3     | 7.972     | 6196   | 3089   | 0.986   | 1.241    |
| Total |           | 628610 | 248788 | 100.000 | 100.000  |

PeakTable

PDA Ch3 220nm 4nm

| Peak# | Ret. Time | Area    | Height  | Area %  | Height % |
|-------|-----------|---------|---------|---------|----------|
| 1     | 7.157     | 51083   | 16629   | 0.864   | 0.620    |
| 2     | 7.466     | 5840037 | 2658065 | 98.771  | 99.045   |
| 3     | 8.945     | 21566   | 9013    | 0.365   | 0.336    |
| Total |           | 5912686 | 2683707 | 100.000 | 100.000  |

# HRMS of 5f

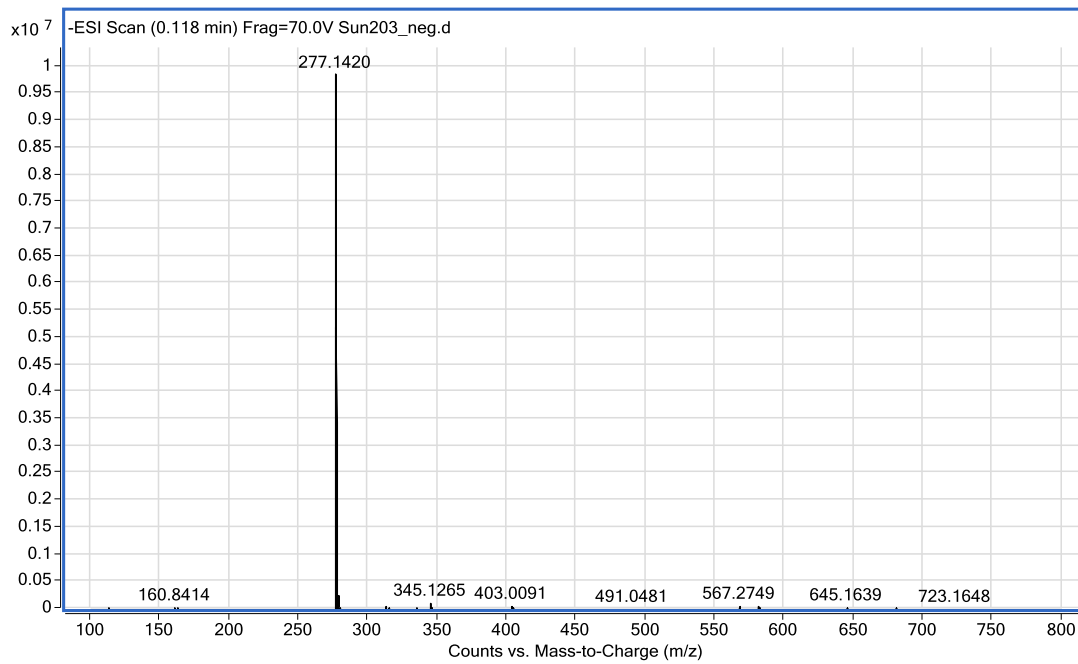

<sup>1</sup>H and <sup>13</sup>C NMR spectra of **5g**

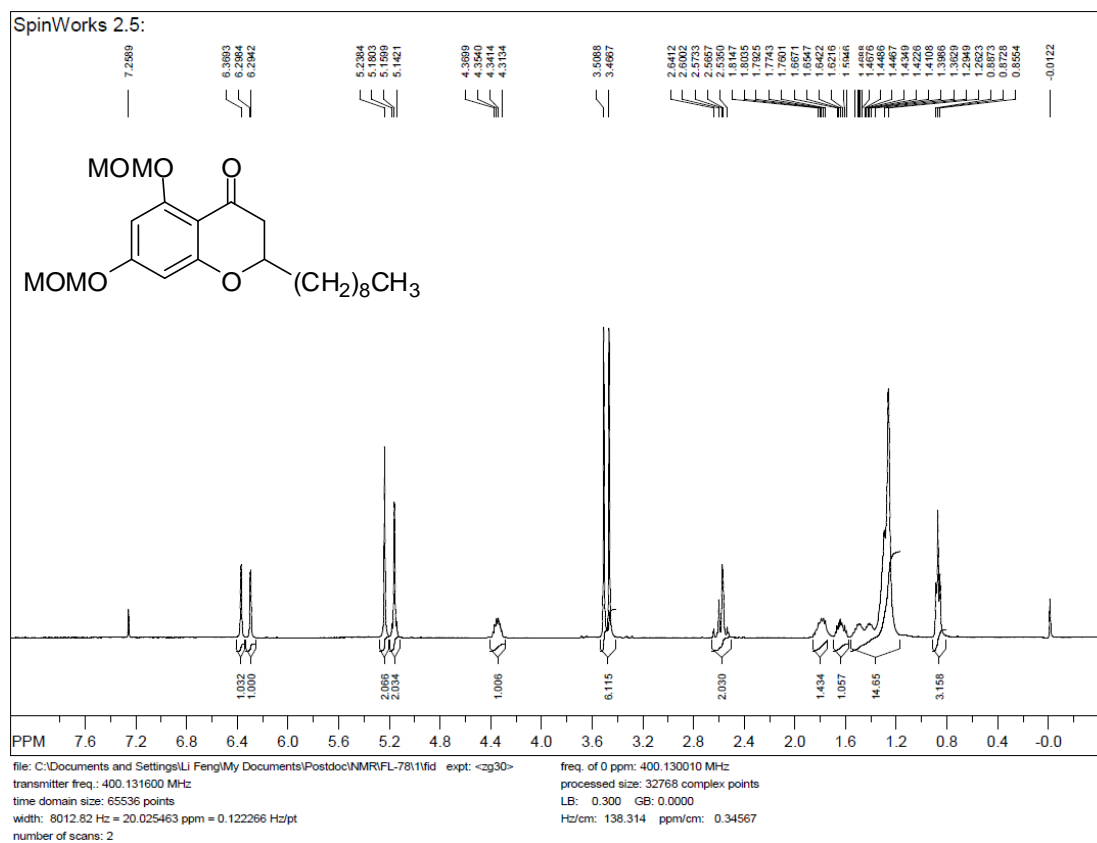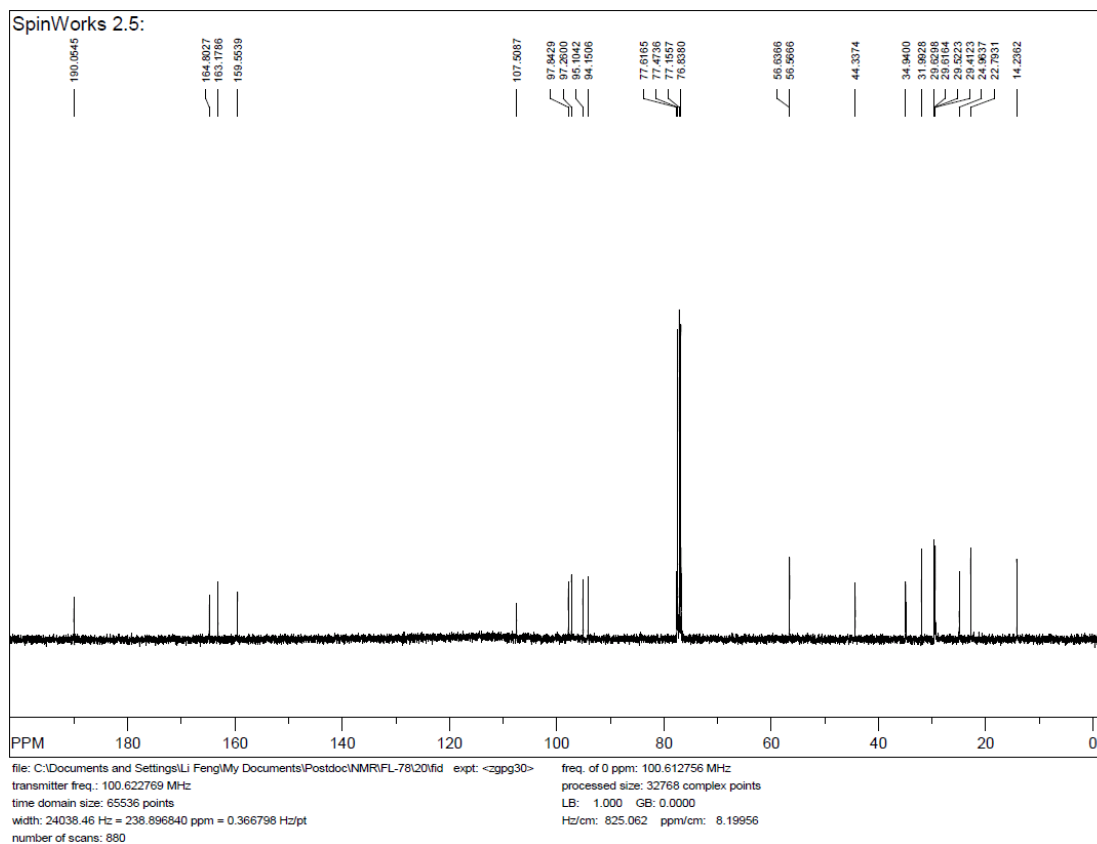

HPLC profile of 5g

==== Shimadzu LCsolution Analysis Report ====

Sample Name : FL-78-P  
 Tray# : 1  
 Vial # : 93  
 Injection Volume : 4 uL  
 Data File Name : FL-78-P.lcd  
 Method File Name : SDQ gradient.lcm  
 Batch File Name : Batch 1.lcb  
 Data Acquired : 11/30/2011 2:53:38 PM

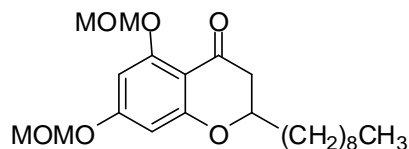

<Chromatogram>

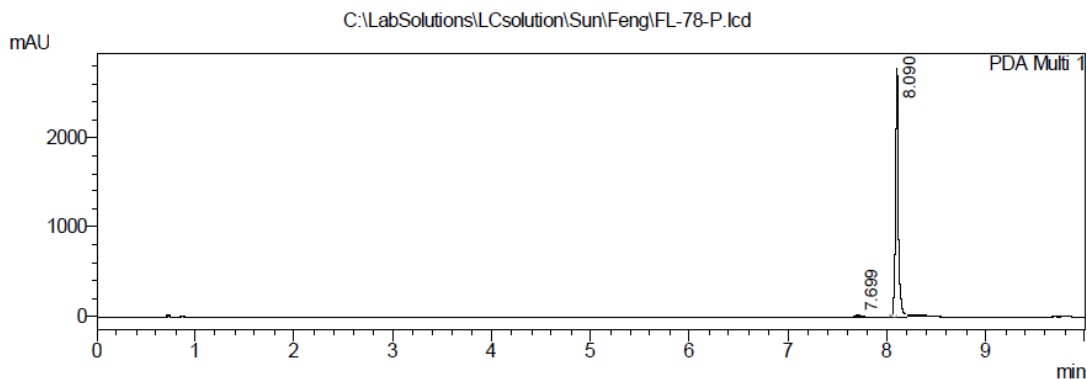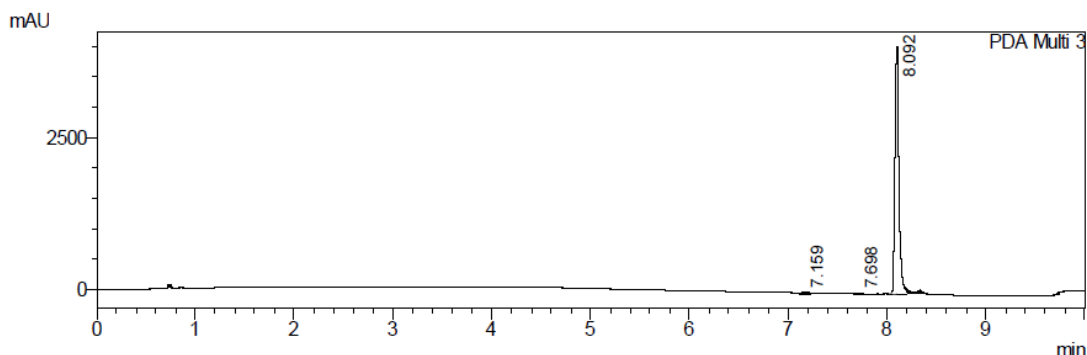

- 1 PDA Multi 1/254nm 4nm
- 2 PDA Multi 3/220nm 4nm

PeakTable

PDA Ch1 254nm 4nm

| Peak# | Ret. Time | Area    | Height  | Area %  | Height % |
|-------|-----------|---------|---------|---------|----------|
| 1     | 7.699     | 8243    | 3340    | 0.127   | 0.124    |
| 2     | 8.090     | 6457119 | 2688295 | 99.873  | 99.876   |
| Total |           | 6465361 | 2691635 | 100.000 | 100.000  |

PeakTable

PDA Ch3 220nm 4nm

| Peak# | Ret. Time | Area     | Height  | Area %  | Height % |
|-------|-----------|----------|---------|---------|----------|
| 1     | 7.159     | 42200    | 15023   | 0.308   | 0.368    |
| 2     | 7.698     | 23589    | 10964   | 0.172   | 0.268    |
| 3     | 8.092     | 13620056 | 4060111 | 99.519  | 99.364   |
| Total |           | 13685845 | 4086098 | 100.000 | 100.000  |



# HRMS of 5g

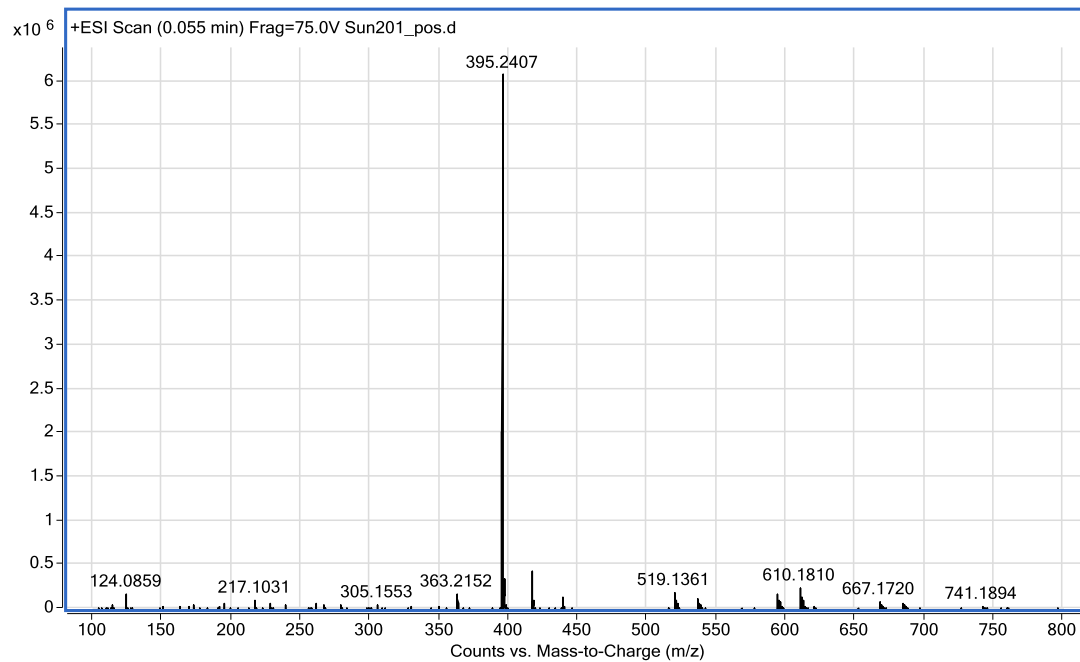

<sup>1</sup>H and <sup>13</sup>C NMR spectra of **5h**

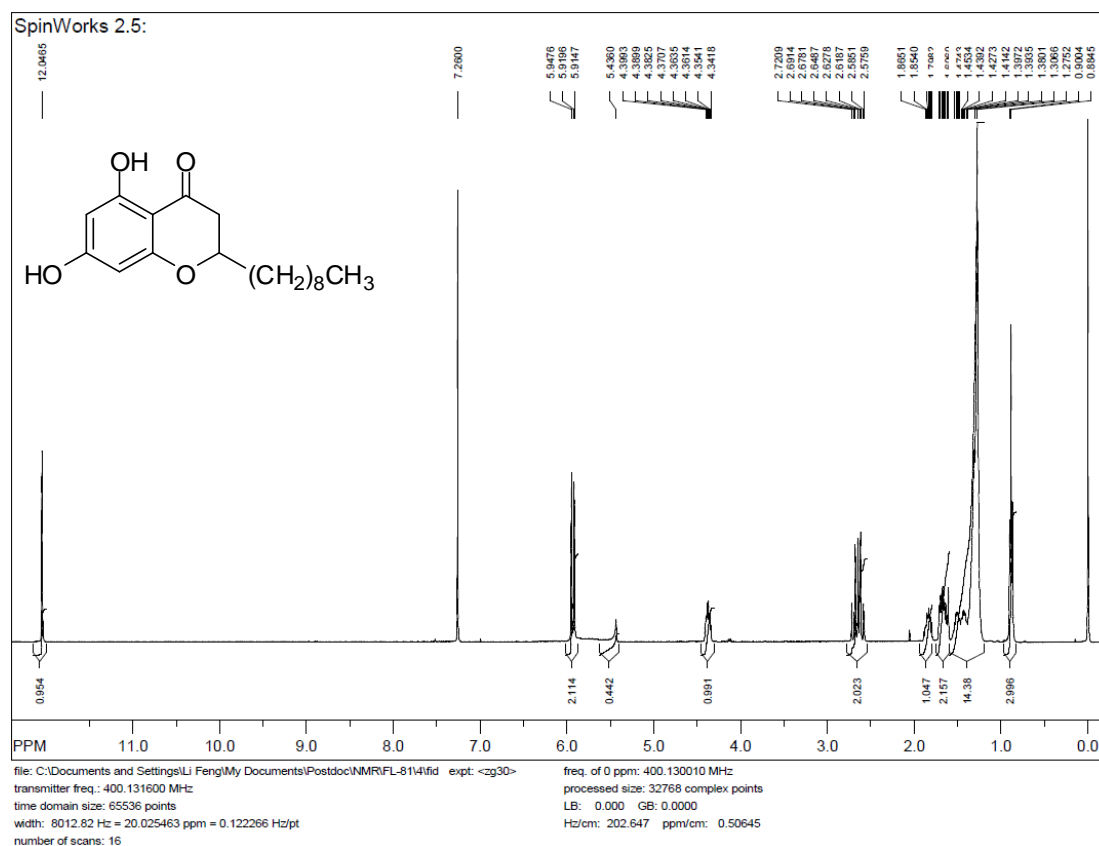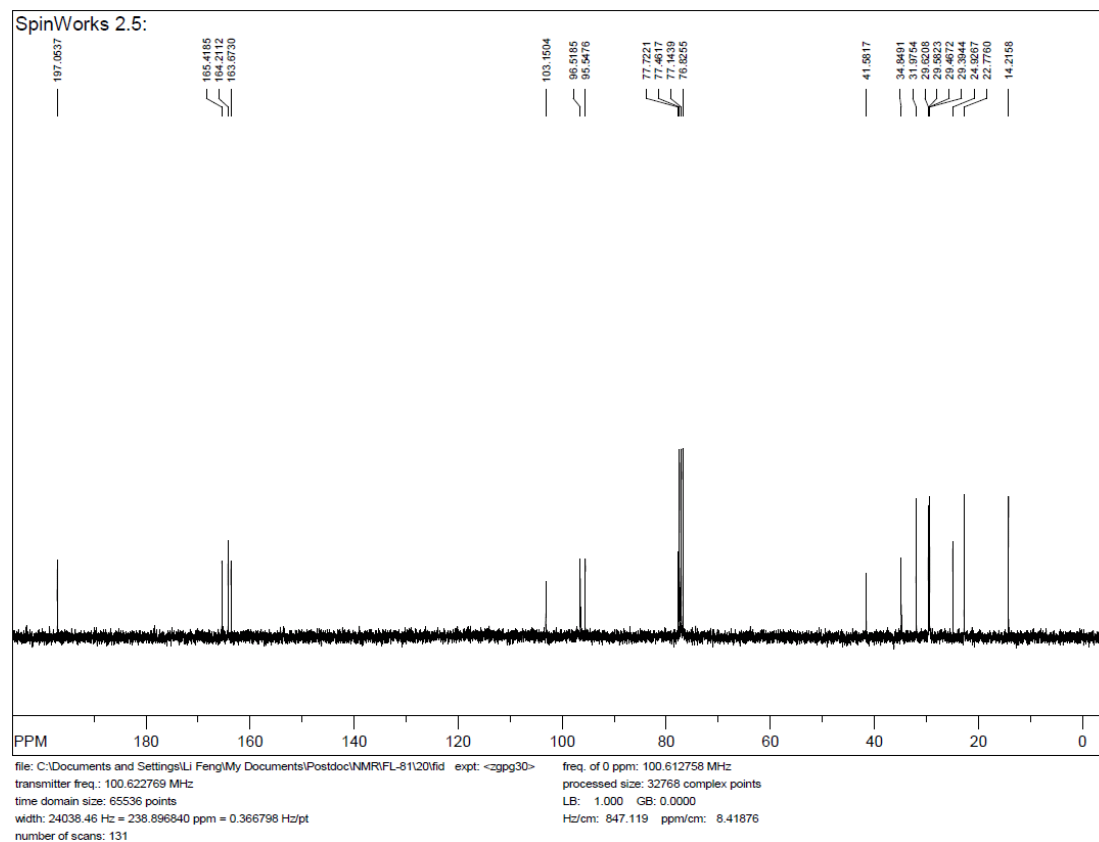

HPLC profile of 5h

==== Shimadzu LCsolution Analysis Report ====

Sample Name : FL-81-P  
 Tray# : 1  
 Vial # : 91  
 Injection Volume : 5 uL  
 Data File Name : FL-81-P.lcd  
 Method File Name : SDQ gradient.lcm  
 Batch File Name :  
 Data Acquired : 12/2/2011 10:56:35 AM

C:\LabSolutions\LCsolution\Sun\Feng\FL-81-P.lcd

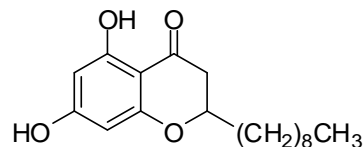

<Chromatogram>

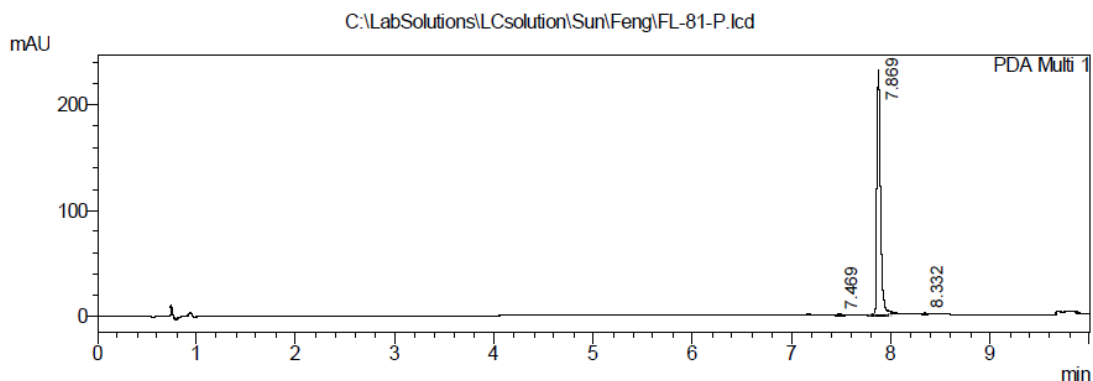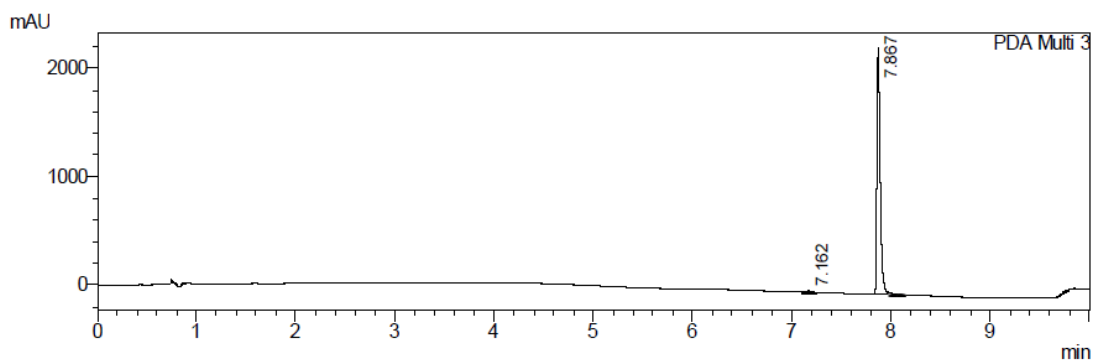

- 1 PDA Multi 1/254nm 4nm
- 2 PDA Multi 3/220nm 4nm

PeakTable

PDA Ch1 254nm 4nm

| Peak# | Ret. Time | Area   | Height | Area %  | Height % |
|-------|-----------|--------|--------|---------|----------|
| 1     | 7.469     | 870    | 460    | 0.147   | 0.198    |
| 2     | 7.869     | 591105 | 231011 | 99.712  | 99.605   |
| 3     | 8.332     | 836    | 456    | 0.141   | 0.196    |
| Total |           | 592812 | 231927 | 100.000 | 100.000  |

PeakTable

PDA Ch3 220nm 4nm

| Peak# | Ret. Time | Area    | Height  | Area %  | Height % |
|-------|-----------|---------|---------|---------|----------|
| 1     | 7.162     | 40146   | 12883   | 0.769   | 0.563    |
| 2     | 7.867     | 5177113 | 2276495 | 99.231  | 99.437   |
| Total |           | 5217260 | 2289378 | 100.000 | 100.000  |

# HRMS of 5h

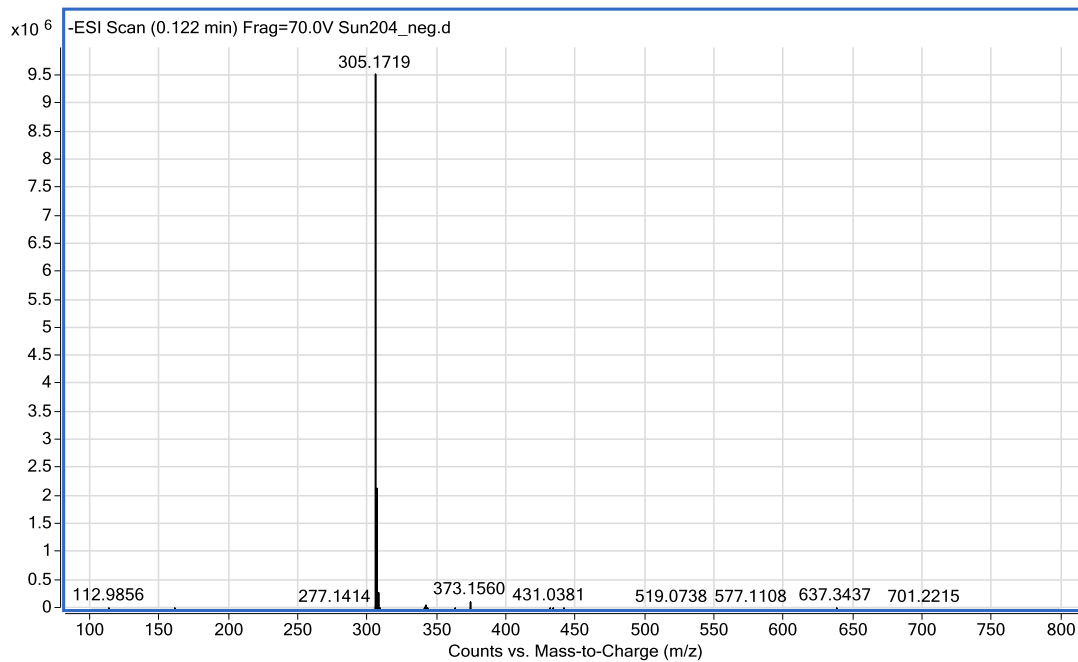

$^1\text{H}$  and  $^{13}\text{C}$  NMR spectra of **5i**

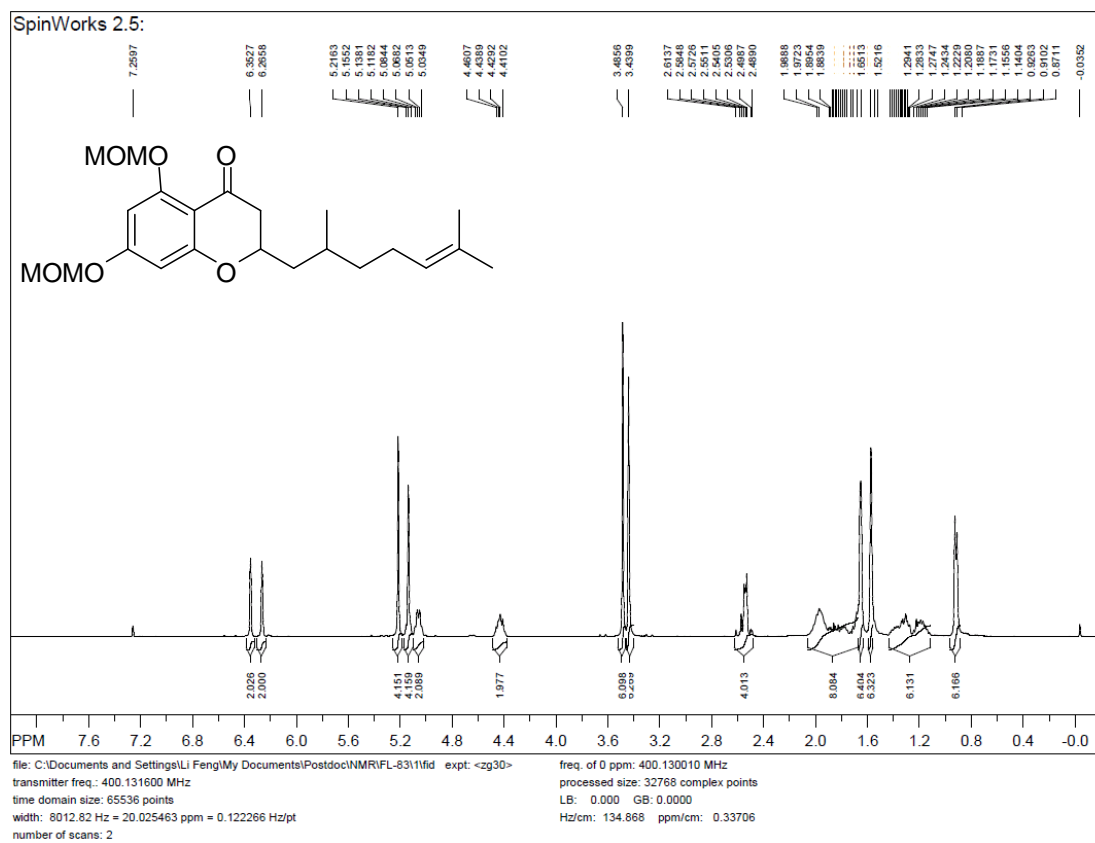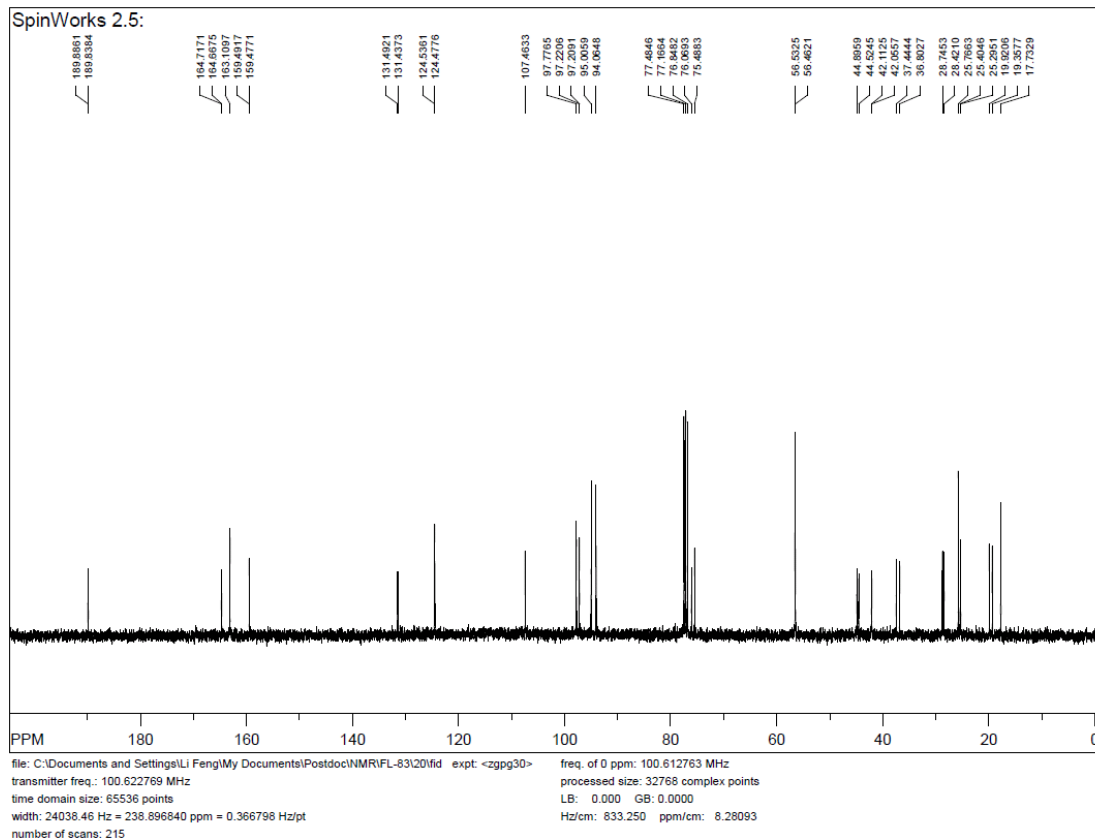

HPLC profile of 5i

## ==== Shimadzu LCsolution Analysis Report ====

Sample Name : FL-83-P  
 Tray# : 1  
 Vial # : 91  
 Injection Volume : 5 uL  
 Data File Name : FL-83-P.lcd  
 Method File Name : SDQ gradient.lcm  
 Batch File Name :  
 Data Acquired : 12/7/2011 10:49:54 AM

C:\LabSolutions\LCsolution\Sun\Feng\FL-83-P.lcd

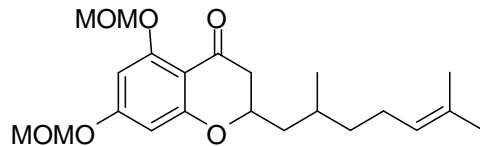

### <Chromatogram>

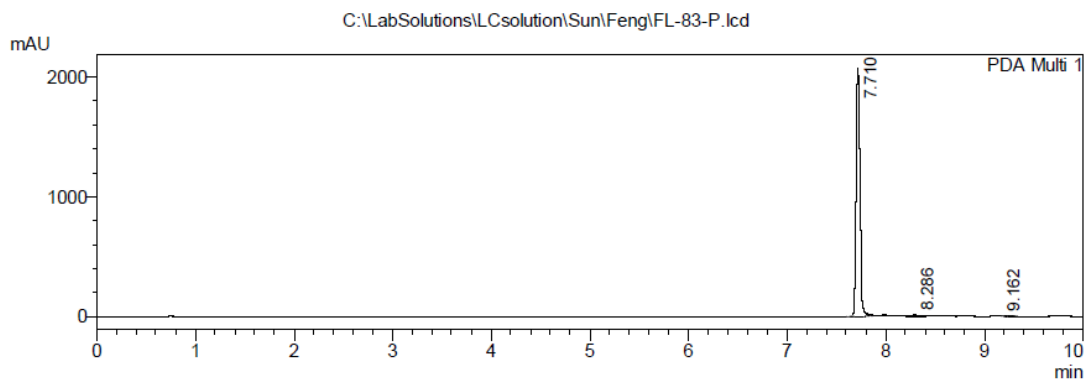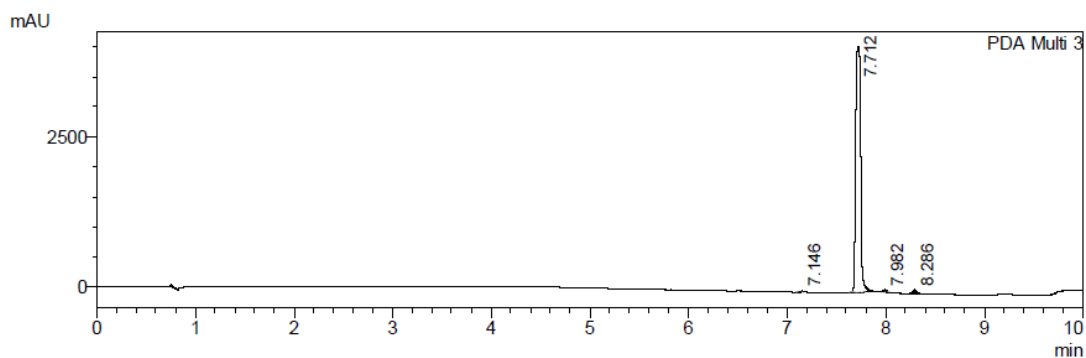

- 1 PDA Multi 1/254nm 4nm
- 2 PDA Multi 3/220nm 4nm

PeakTable

PDA Ch1 254nm 4nm

| Peak# | Ret. Time | Area    | Height  | Area %  | Height % |
|-------|-----------|---------|---------|---------|----------|
| 1     | 7.710     | 5177360 | 2051541 | 98.828  | 99.109   |
| 2     | 8.286     | 29363   | 14193   | 0.560   | 0.686    |
| 3     | 9.162     | 32026   | 4258    | 0.611   | 0.206    |
| Total |           | 5238749 | 2069992 | 100.000 | 100.000  |

PeakTable

PDA Ch3 220nm 4nm

| Peak# | Ret. Time | Area     | Height  | Area %  | Height % |
|-------|-----------|----------|---------|---------|----------|
| 1     | 7.146     | 38588    | 14873   | 0.277   | 0.354    |
| 2     | 7.712     | 13685217 | 4091946 | 98.413  | 97.530   |
| 3     | 7.982     | 50242    | 27839   | 0.361   | 0.664    |
| 4     | 8.286     | 131891   | 60909   | 0.948   | 1.452    |
| Total |           | 13905938 | 4195567 | 100.000 | 100.000  |

HRMS of **5i**

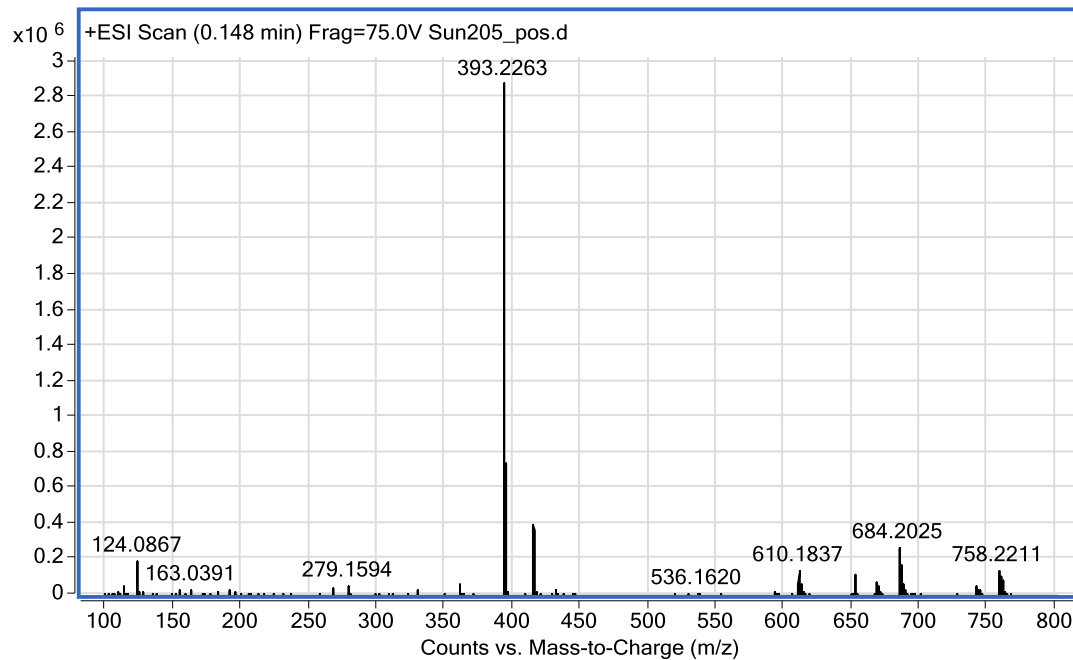

$^1\text{H}$  and  $^{13}\text{C}$  NMR spectra of **5j**

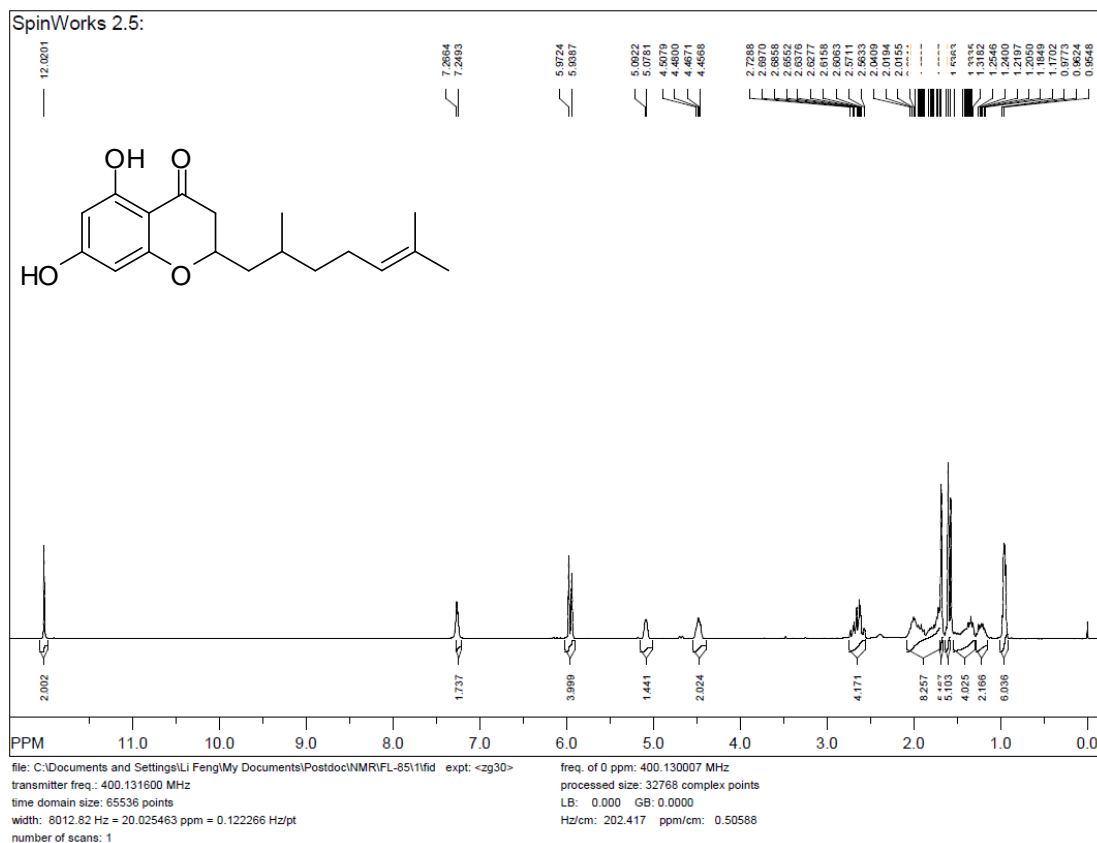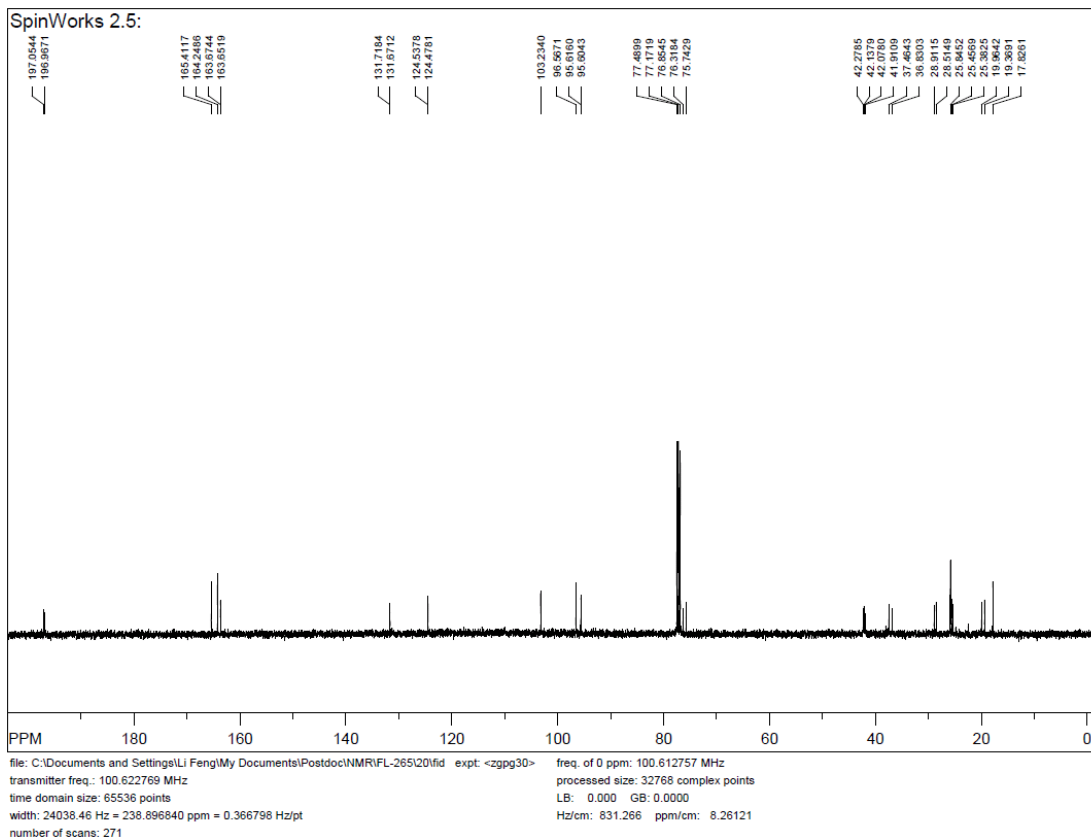



HPLC profile of 5j

## ==== Shimadzu LCsolution Analysis Report ====

C:\LabSolutions\LCsolution\Sun\Feng\FL-85-P.lcd

Sample Name : FL-85-P  
 Tray# : 1  
 Vail # : 91  
 Injection Volume : 5 uL  
 Data File Name : FL-85-P.lcd  
 Method File Name : SDQ gradient.lcm  
 Batch File Name :  
 Data Acquired : 12/7/2011 2:51:50 PM

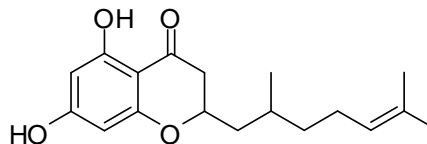

### <Chromatogram>

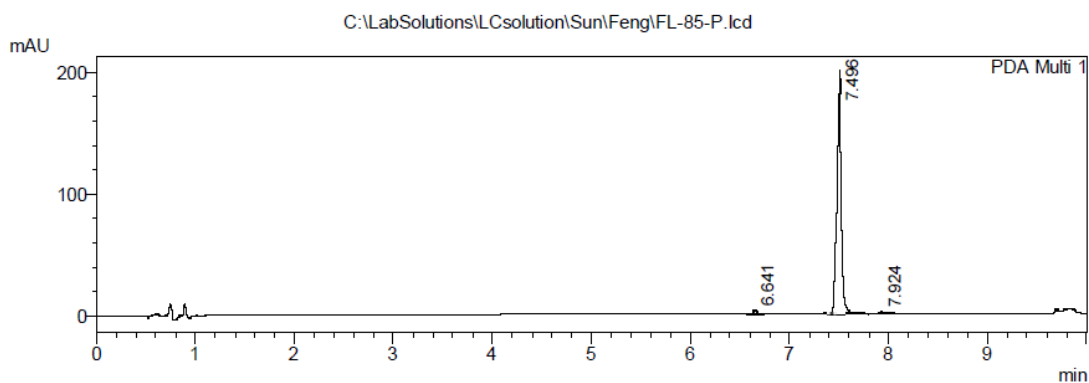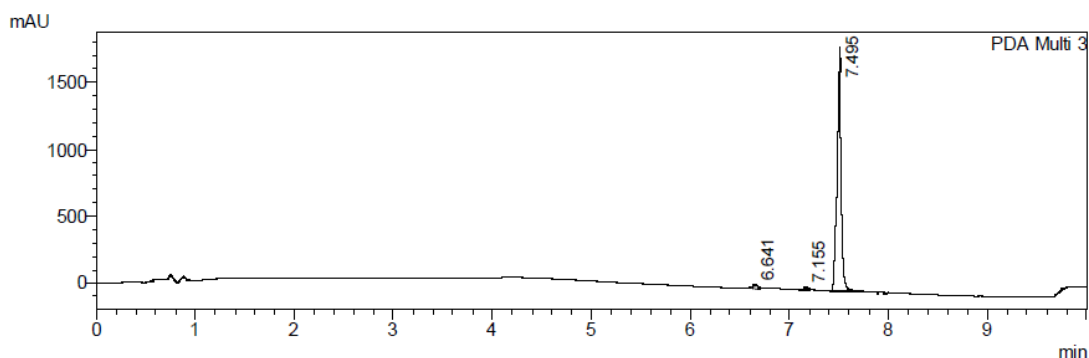

- 1 PDA Multi 1/254nm 4nm
- 2 PDA Multi 3/220nm 4nm

PeakTable

PDA Ch1 254nm 4nm

| Peak# | Ret. Time | Area   | Height | Area %  | Height % |
|-------|-----------|--------|--------|---------|----------|
| 1     | 6.641     | 7702   | 2986   | 1.179   | 1.504    |
| 2     | 7.496     | 643188 | 194752 | 98.433  | 98.084   |
| 3     | 7.924     | 2538   | 817    | 0.388   | 0.412    |
| Total |           | 653428 | 198556 | 100.000 | 100.000  |

PeakTable

PDA Ch3 220nm 4nm

| Peak# | Ret. Time | Area    | Height  | Area %  | Height % |
|-------|-----------|---------|---------|---------|----------|
| 1     | 6.641     | 55796   | 24046   | 0.985   | 1.294    |
| 2     | 7.155     | 34633   | 14115   | 0.612   | 0.760    |
| 3     | 7.495     | 5571532 | 1820010 | 98.403  | 97.946   |
| Total |           | 5661961 | 1858172 | 100.000 | 100.000  |

# HRMS of 5j

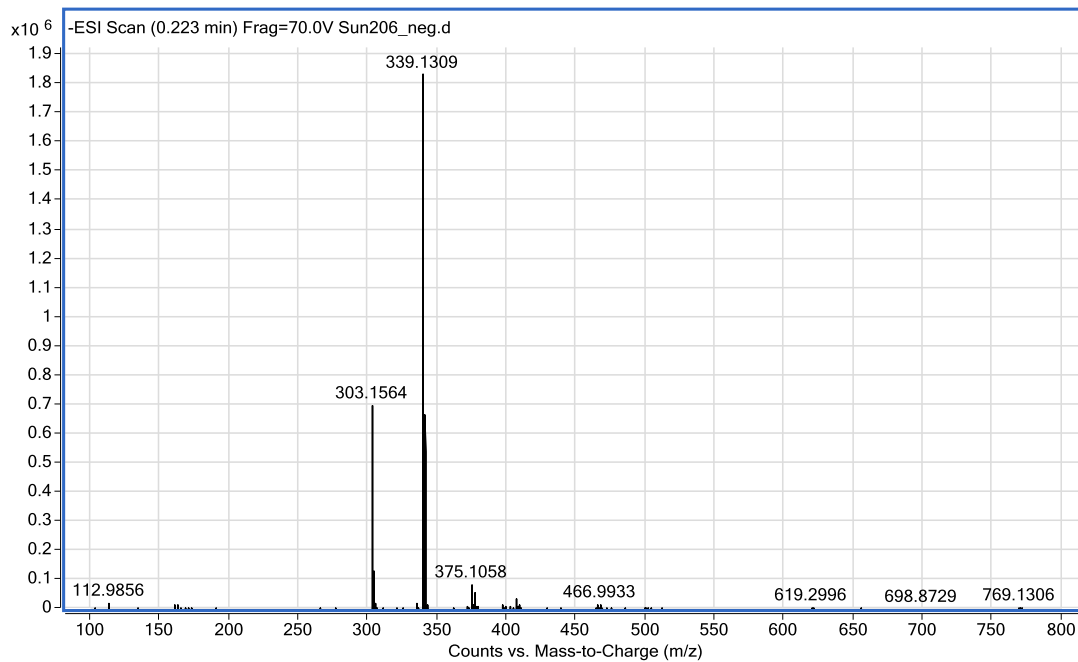

<sup>1</sup>H and <sup>13</sup>C NMR spectra of **5k**

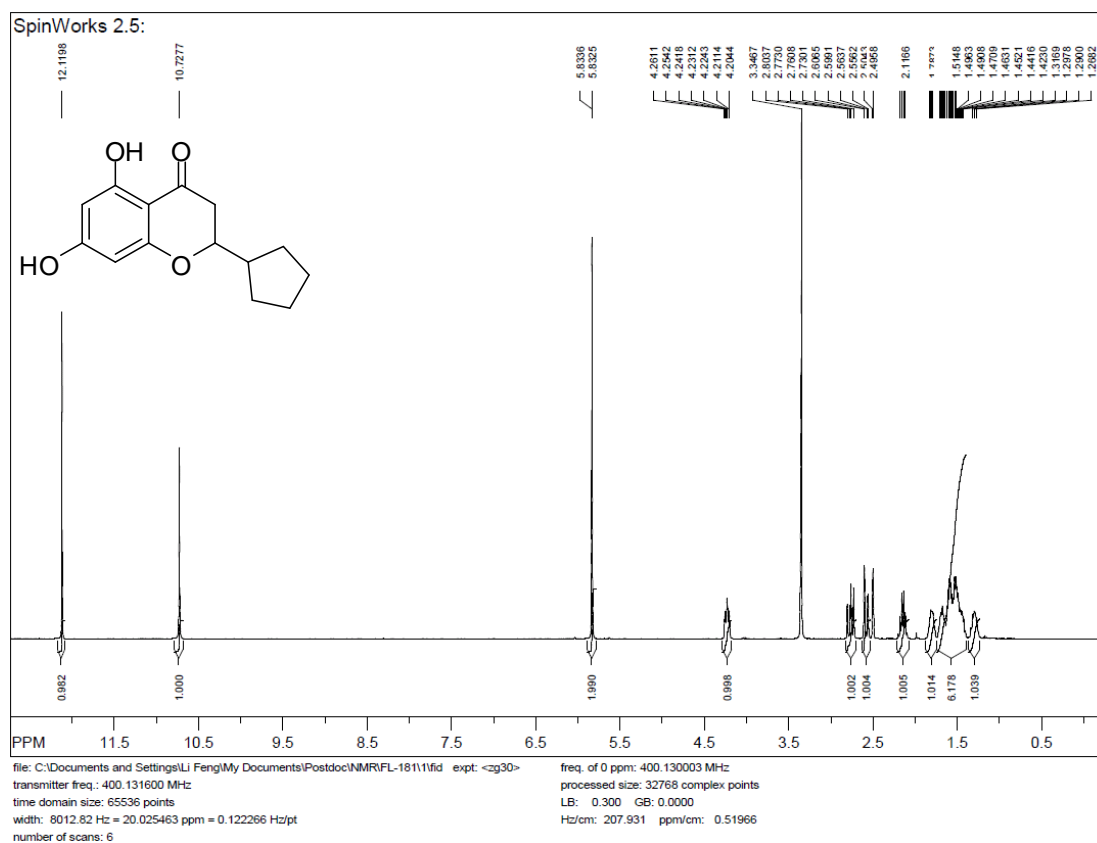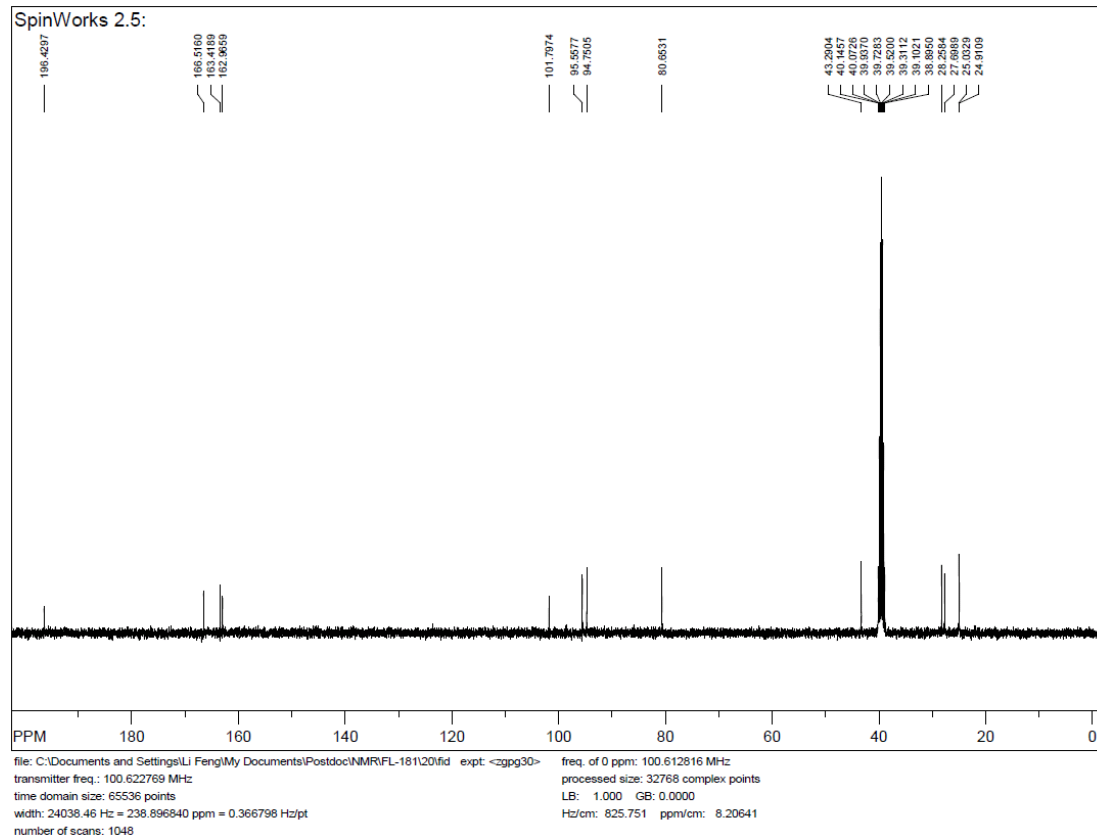

HPLC profile of 5k

==== Shimadzu LCsolution Analysis Report ====

Sample Name : FL-181-P  
 Tray# : 1  
 Vial # : 95  
 Injection Volume : 10 uL  
 Data File Name : FL-181-P.lcd  
 Method File Name : SDQ gradient.lcm  
 Batch File Name : Batch 1.lcb  
 Data Acquired : 3/8/2012 1:06:10 PM

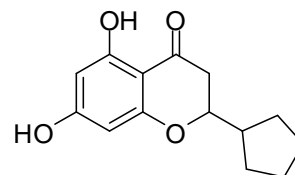

<Chromatogram>

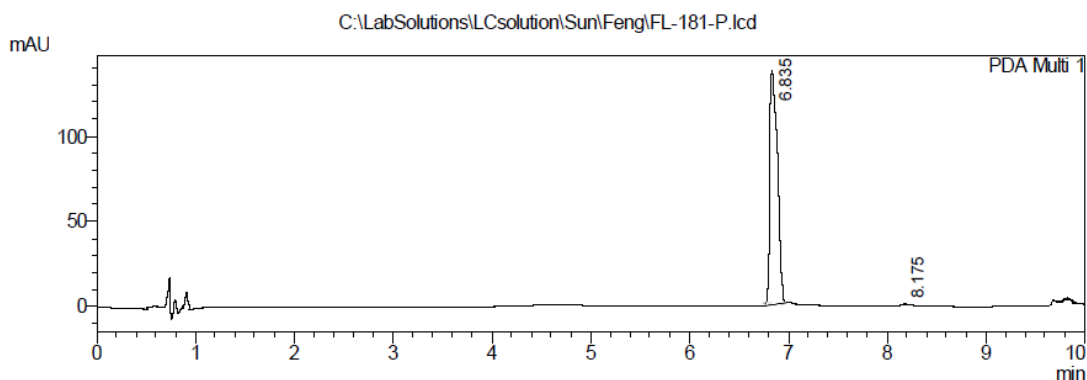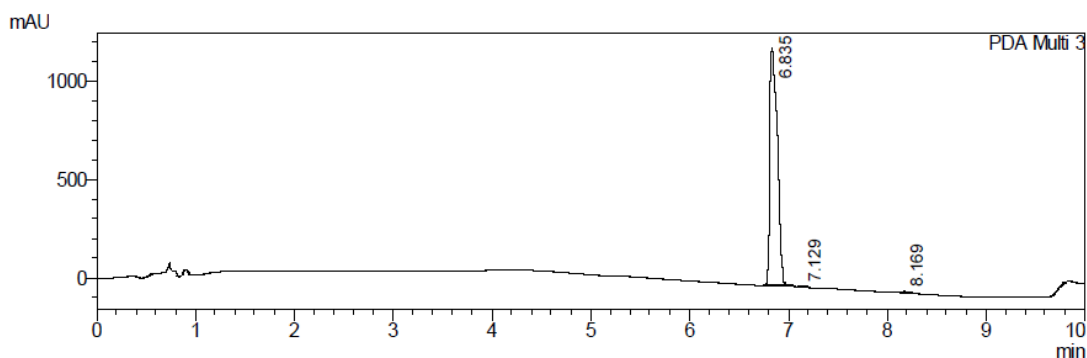

- 1 PDA Multi 1/254nm 4nm
- 2 PDA Multi 3/220nm 4nm

PeakTable

PDA Ch1 254nm 4nm

| Peak# | Ret. Time | Area   | Height | Area %  | Height % |
|-------|-----------|--------|--------|---------|----------|
| 1     | 6.835     | 734422 | 137028 | 99.611  | 99.520   |
| 2     | 8.175     | 2867   | 660    | 0.389   | 0.480    |
| Total |           | 737288 | 137688 | 100.000 | 100.000  |

PeakTable

PDA Ch3 220nm 4nm

| Peak# | Ret. Time | Area    | Height  | Area %  | Height % |
|-------|-----------|---------|---------|---------|----------|
| 1     | 6.835     | 6409188 | 1205931 | 99.598  | 99.430   |
| 2     | 7.129     | 8049    | 2243    | 0.125   | 0.185    |
| 3     | 8.169     | 17836   | 4674    | 0.277   | 0.385    |
| Total |           | 6435073 | 1212848 | 100.000 | 100.000  |

# HRMS of 5k

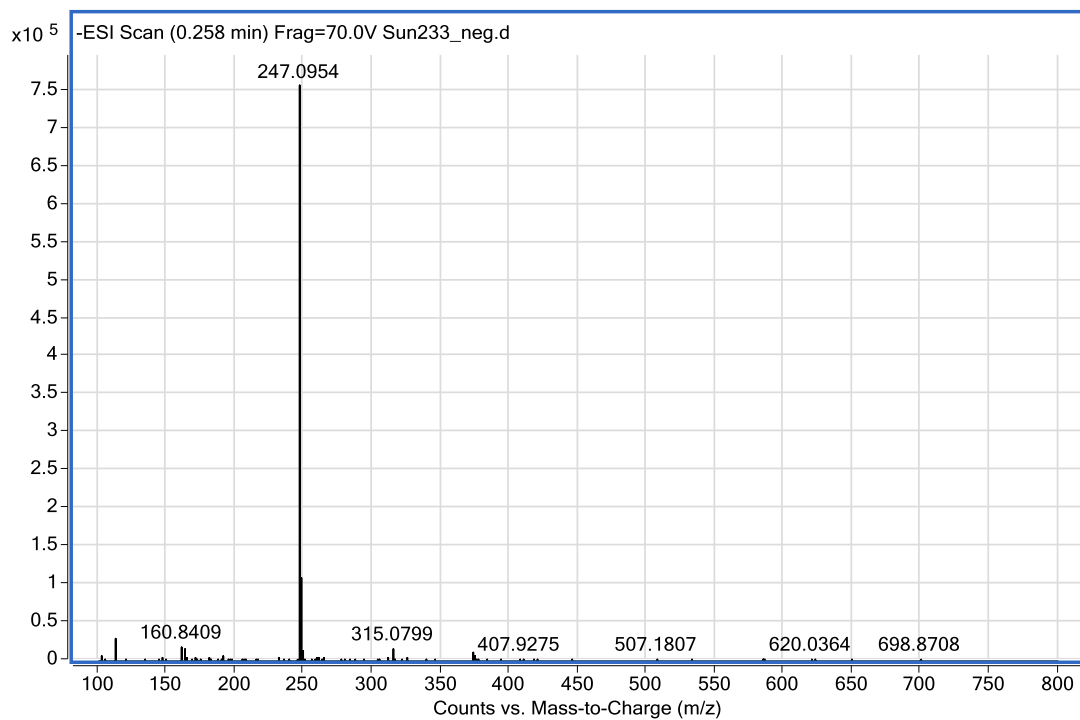

$^1\text{H}$  and  $^{13}\text{C}$  NMR spectra of **51**

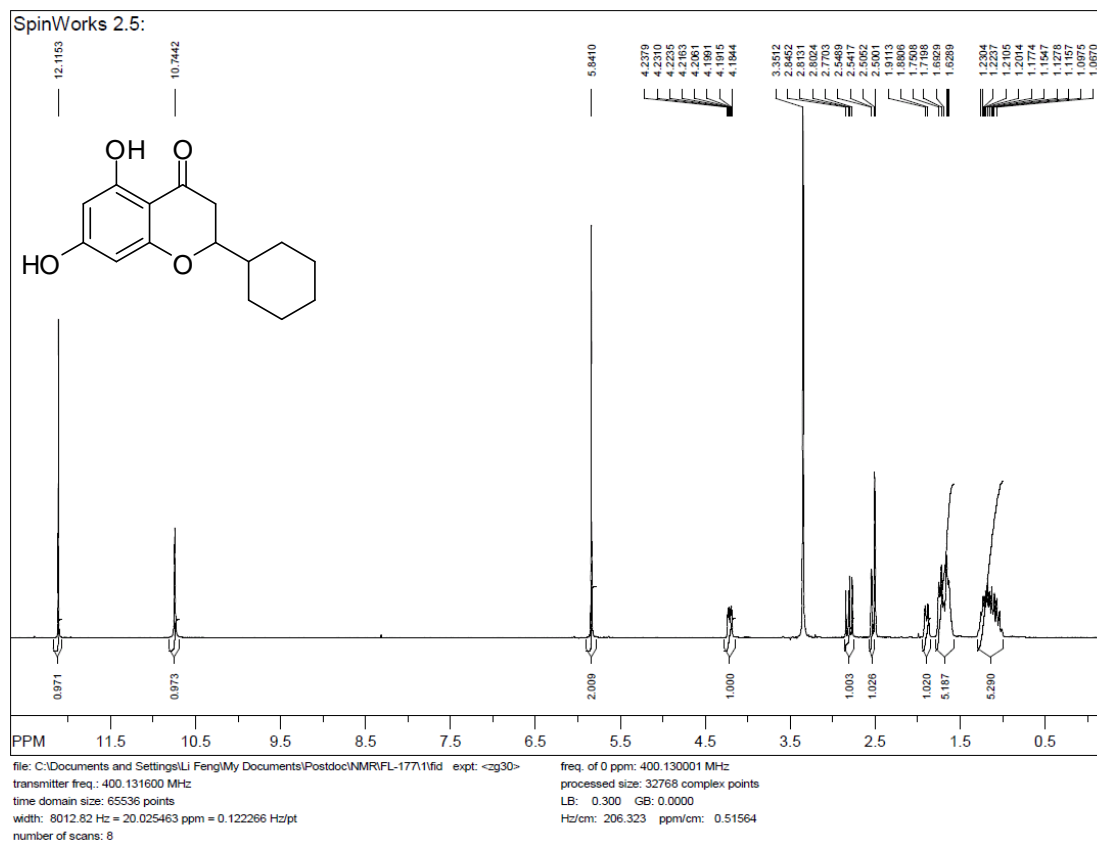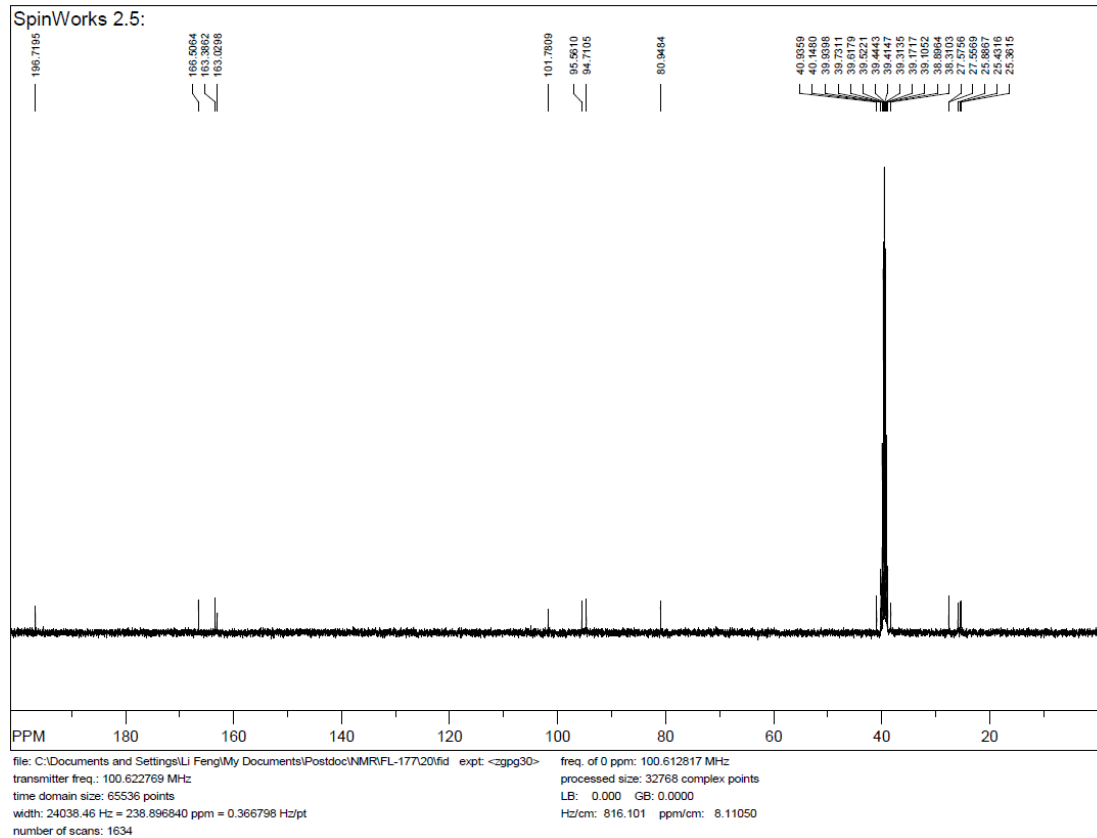

HPLC profile of 51

## ==== Shimadzu LCsolution Analysis Report ====

Sample Name : FL-177-P  
 Tray# : 1  
 Vail # : 94  
 Injection Volume : 10 uL  
 Data File Name : FL-177-P.lcd  
 Method File Name : SDQ gradient.lcm  
 Batch File Name : Batch 1.lcb  
 Data Acquired : 3/8/2012 12:55:44 PM

C:\LabSolutions\LCsolution\Sun\Feng\FL-177-P.lcd

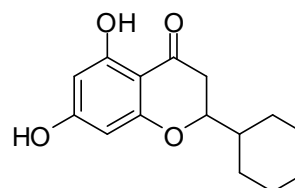

### <Chromatogram>

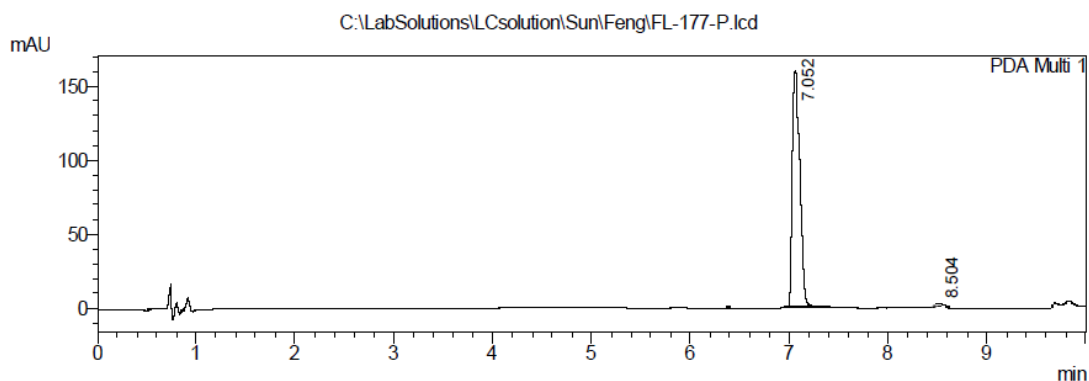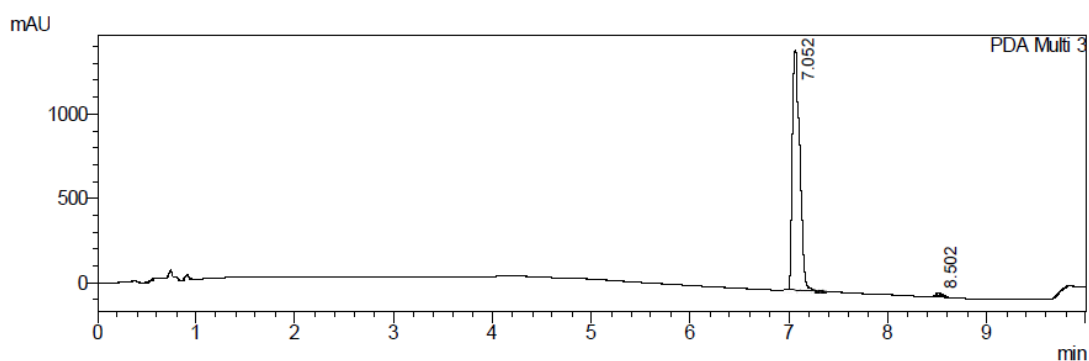

- 1 PDA Multi 1/254nm 4nm
- 2 PDA Multi 3/220nm 4nm

PeakTable

PDA Ch1 254nm 4nm

| Peak# | Ret. Time | Area   | Height | Area %  | Height % |
|-------|-----------|--------|--------|---------|----------|
| 1     | 7.052     | 882200 | 159818 | 99.113  | 98.788   |
| 2     | 8.504     | 7891   | 1961   | 0.887   | 1.212    |
| Total |           | 890092 | 161780 | 100.000 | 100.000  |

PeakTable

PDA Ch3 220nm 4nm

| Peak# | Ret. Time | Area    | Height  | Area %  | Height % |
|-------|-----------|---------|---------|---------|----------|
| 1     | 7.052     | 7707663 | 1424117 | 99.503  | 99.211   |
| 2     | 8.502     | 38510   | 11322   | 0.497   | 0.789    |
| Total |           | 7746173 | 1435439 | 100.000 | 100.000  |

# HRMS of 51

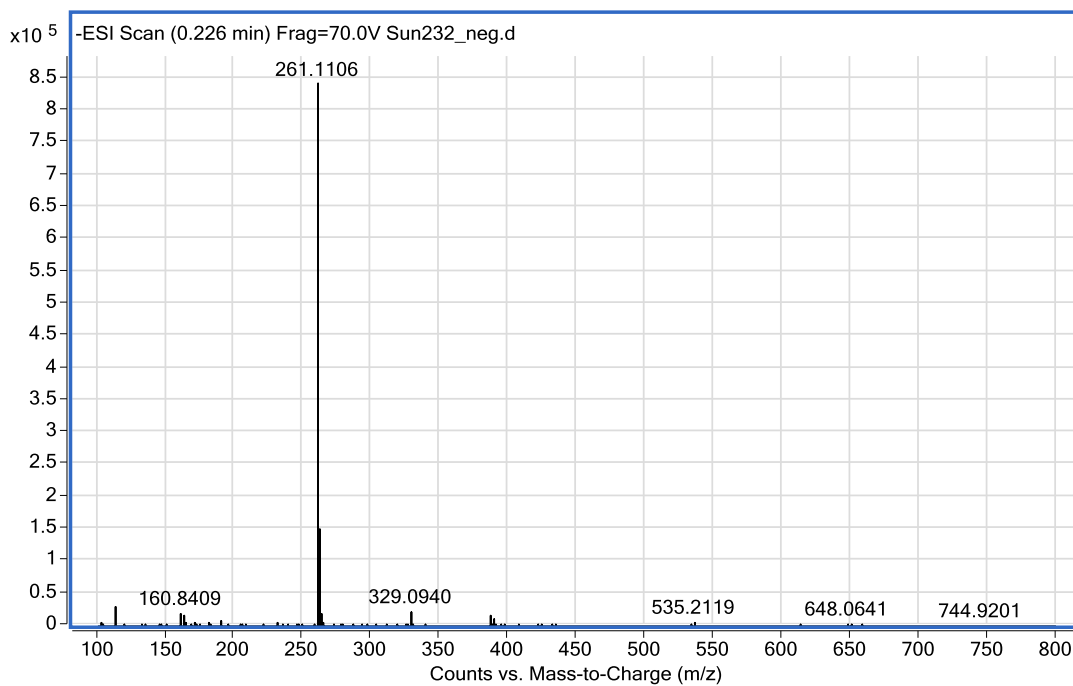



$^1\text{H}$  and  $^{13}\text{C}$  NMR spectra of **5m**

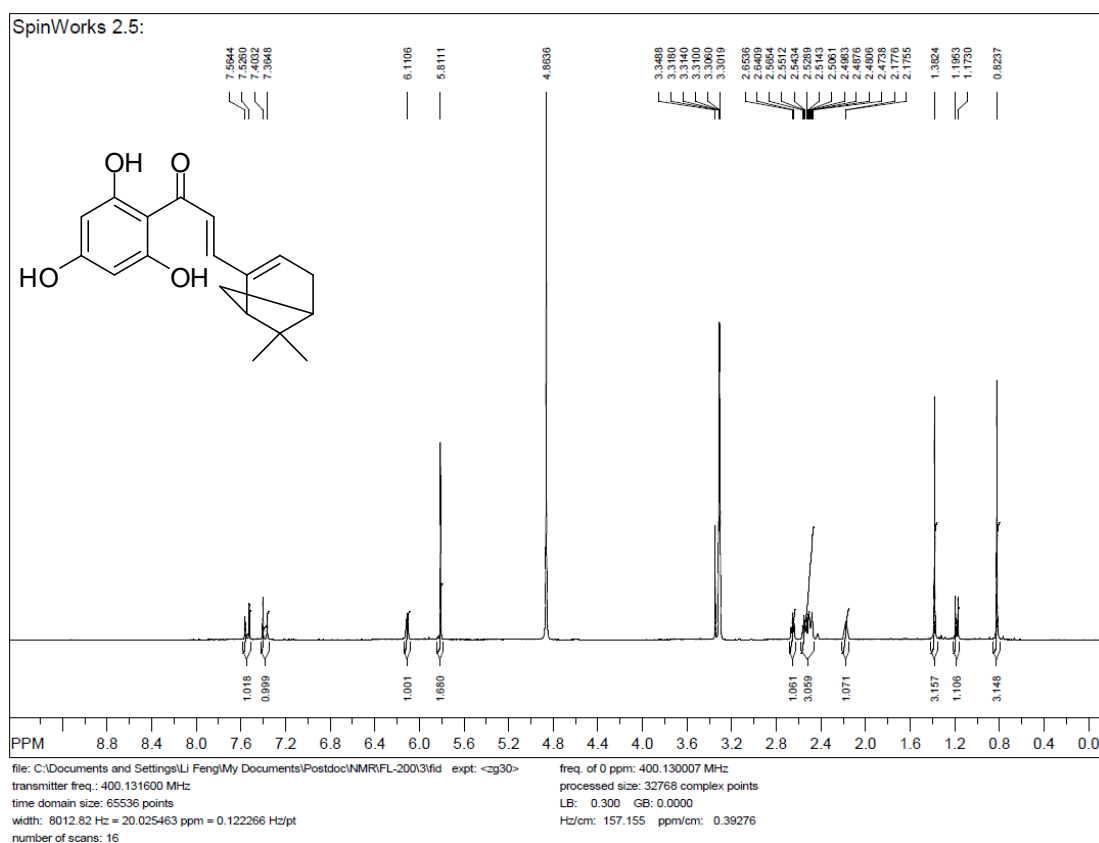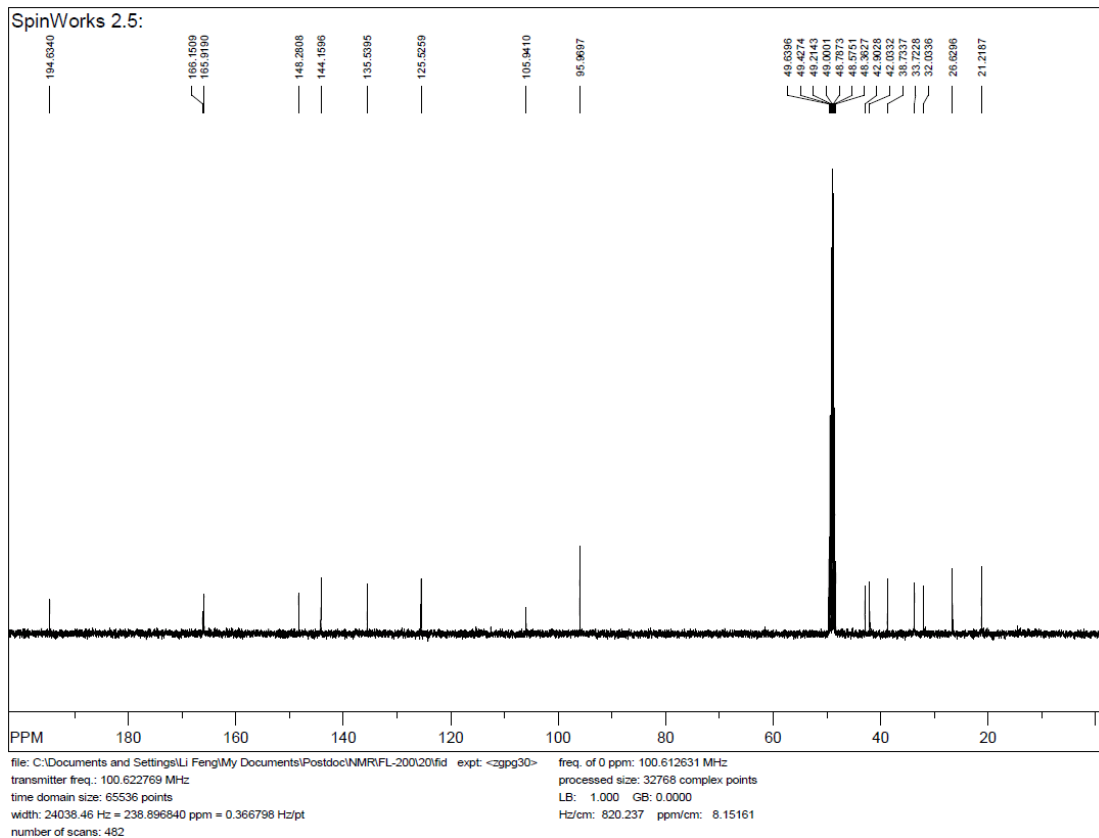

HPLC profile of 5m

==== Shimadzu LCsolution Analysis Report ====

Sample Name : FL-200-P  
 Tray# : 1  
 Vial # : 91  
 Injection Volume : 10 uL  
 Data File Name : FL-200-P.lcd  
 Method File Name : SDQ gradient.lcm  
 Batch File Name :  
 Data Acquired : 3/29/2012 11:02:13 AM

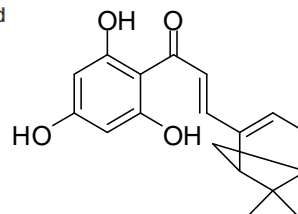

<Chromatogram>

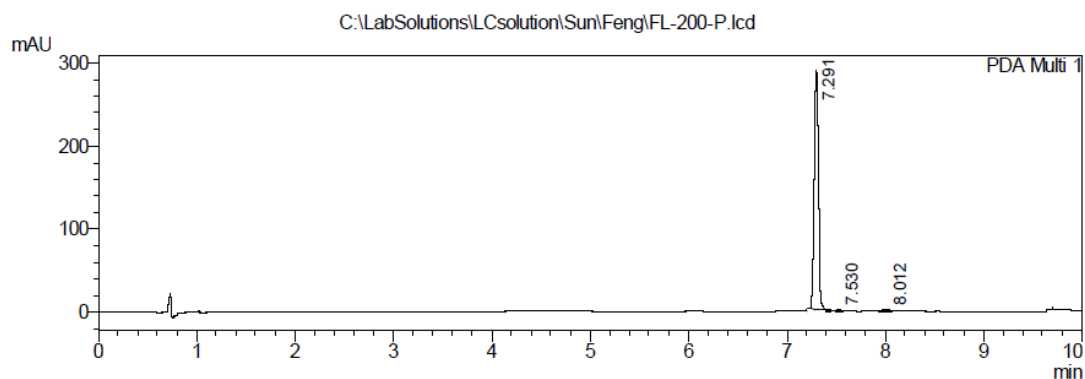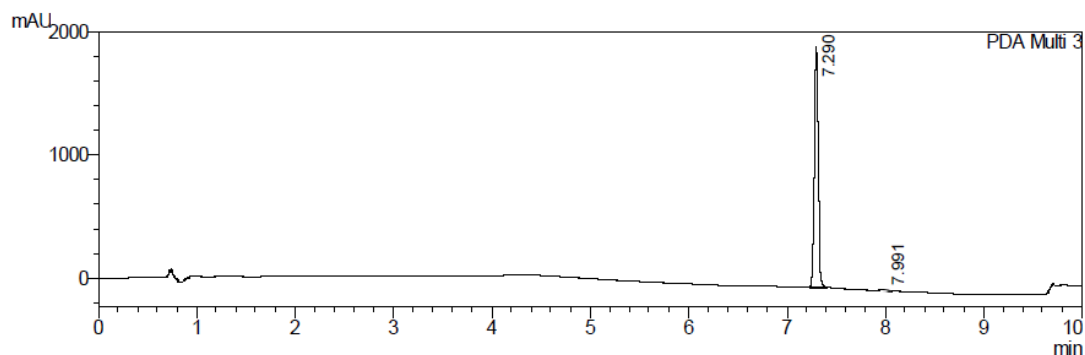

- 1 PDA Multi 1/254nm 4nm
- 2 PDA Multi 3/220nm 4nm

PeakTable

PDA Ch1 254nm 4nm

| Peak# | Ret. Time | Area   | Height | Area %  | Height % |
|-------|-----------|--------|--------|---------|----------|
| 1     | 7.291     | 809367 | 286197 | 99.567  | 99.672   |
| 2     | 7.530     | 744    | 343    | 0.092   | 0.119    |
| 3     | 8.012     | 2773   | 600    | 0.341   | 0.209    |
| Total |           | 812885 | 287140 | 100.000 | 100.000  |

PeakTable

PDA Ch3 220nm 4nm

| Peak# | Ret. Time | Area    | Height  | Area %  | Height % |
|-------|-----------|---------|---------|---------|----------|
| 1     | 7.290     | 4984261 | 1958548 | 99.909  | 99.960   |
| 2     | 7.991     | 4561    | 792     | 0.091   | 0.040    |
| Total |           | 4988822 | 1959340 | 100.000 | 100.000  |

# HRMS of 5m

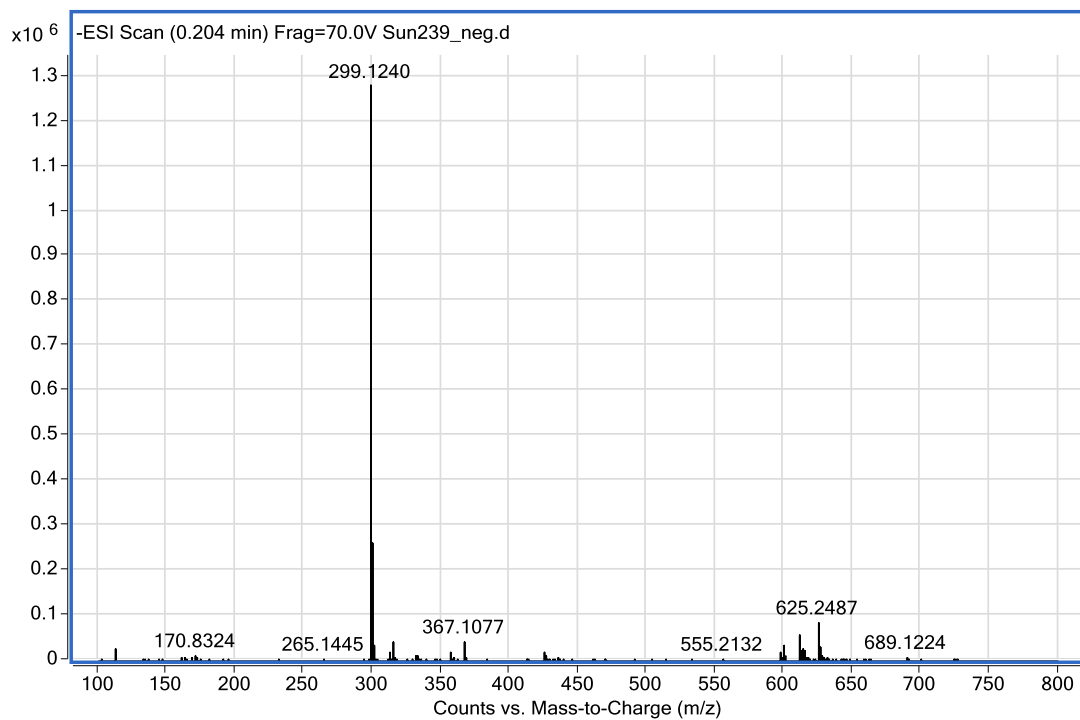

$^1\text{H}$  and  $^{13}\text{C}$  NMR spectra of **5n**

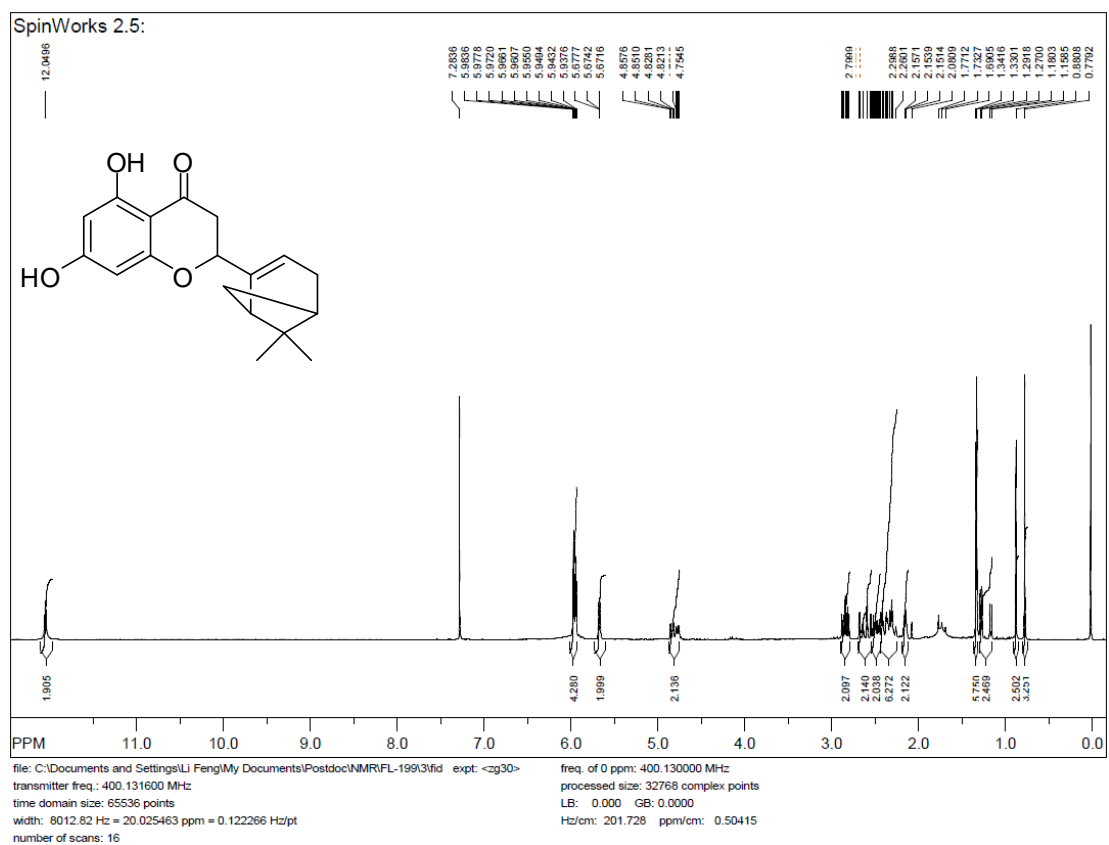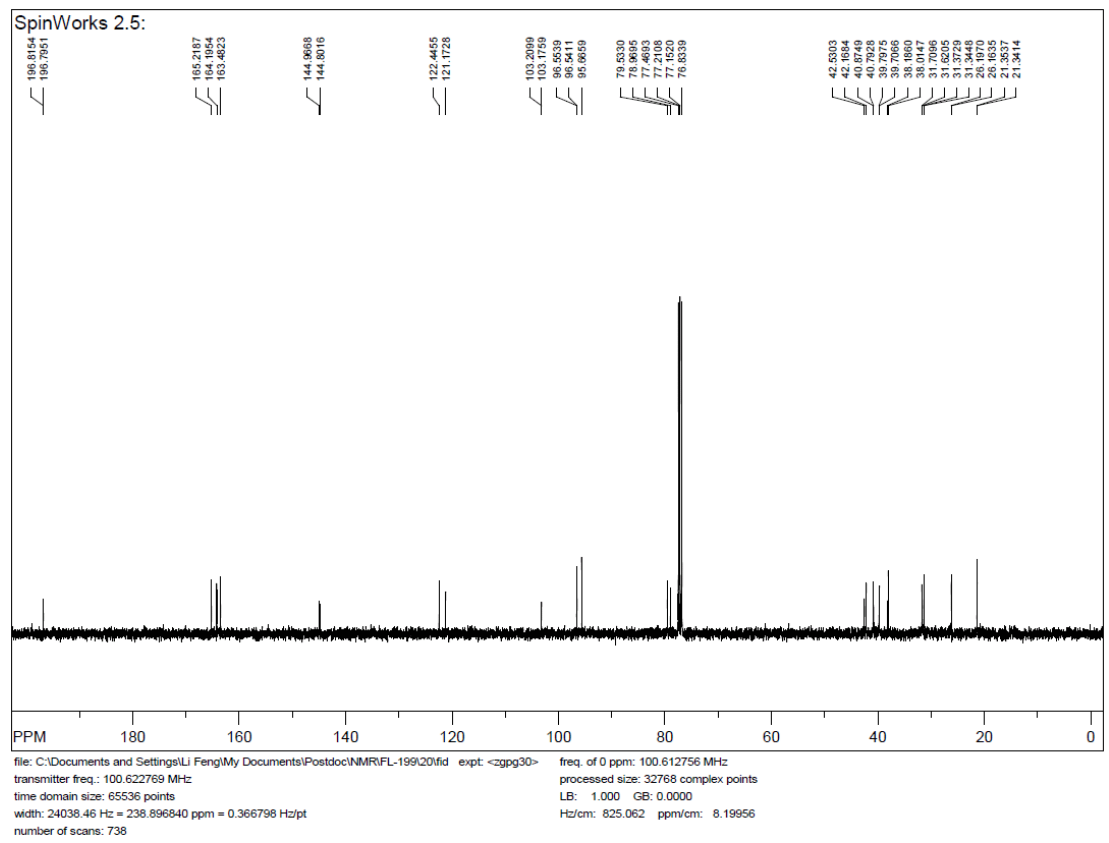

HPLC profile of 5n

==== Shimadzu LCsolution Analysis Report ====

Sample Name : FL-199-P  
 Tray# : 1  
 Vial # : 91  
 Injection Volume : 9 uL  
 Data File Name : FL-199-P.lcd  
 Method File Name : SDQ gradient.lcm  
 Batch File Name :  
 Data Acquired : 3/28/2012 3:14:23 PM

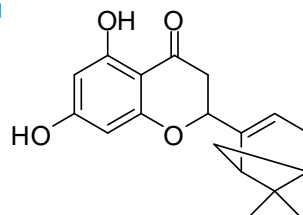

<Chromatogram>

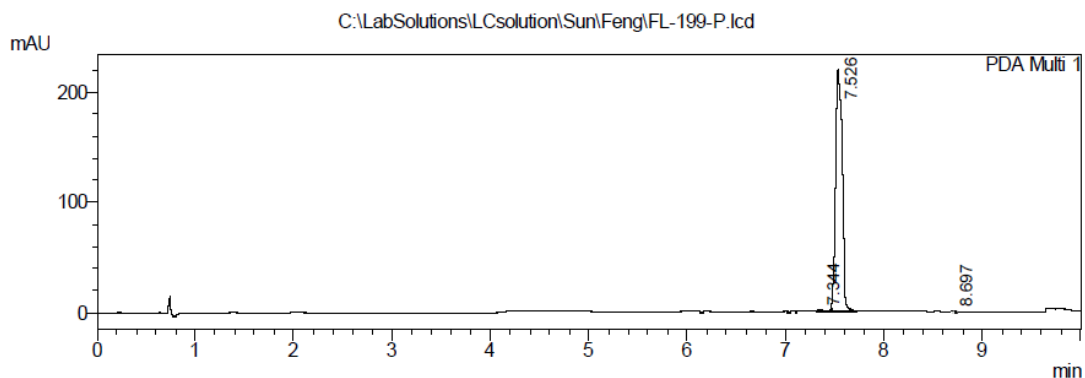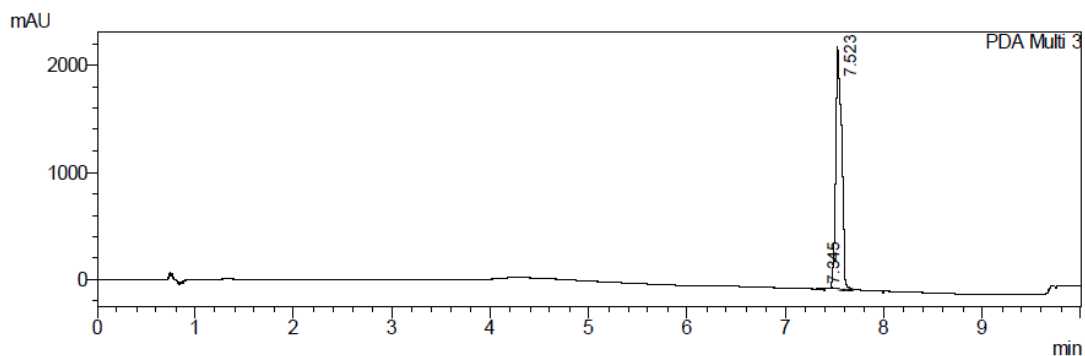

- 1 PDA Multi 1/254nm 4nm
- 2 PDA Multi 3/220nm 4nm

PeakTable

PDA Ch1 254nm 4nm

| Peak# | Ret. Time | Area   | Height | Area %  | Height % |
|-------|-----------|--------|--------|---------|----------|
| 1     | 7.344     | 2154   | 1001   | 0.222   | 0.456    |
| 2     | 7.526     | 966316 | 218349 | 99.706  | 99.397   |
| 3     | 8.697     | 694    | 325    | 0.072   | 0.148    |
| Total |           | 969164 | 219674 | 100.000 | 100.000  |

PeakTable

PDA Ch3 220nm 4nm

| Peak# | Ret. Time | Area    | Height  | Area %  | Height % |
|-------|-----------|---------|---------|---------|----------|
| 1     | 7.345     | 10566   | 6652    | 0.118   | 0.292    |
| 2     | 7.523     | 8925430 | 2273584 | 99.882  | 99.708   |
| Total |           | 8935996 | 2280236 | 100.000 | 100.000  |

# HRMS of 5n

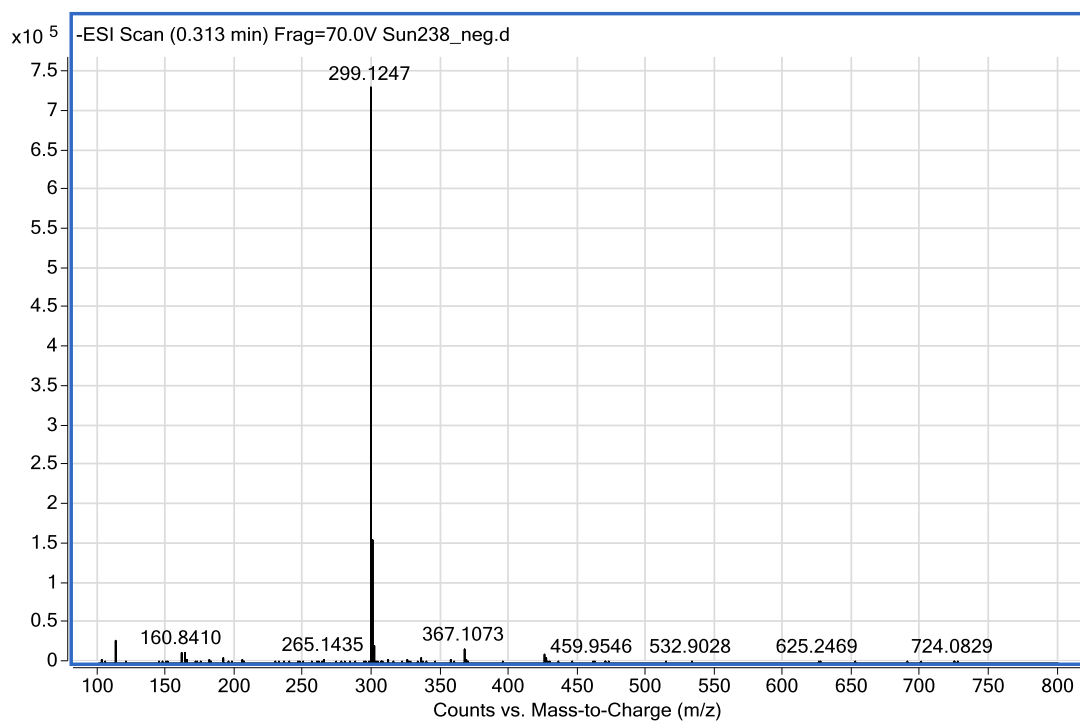

$^1\text{H}$  and  $^{13}\text{C}$  NMR spectra of **6a**

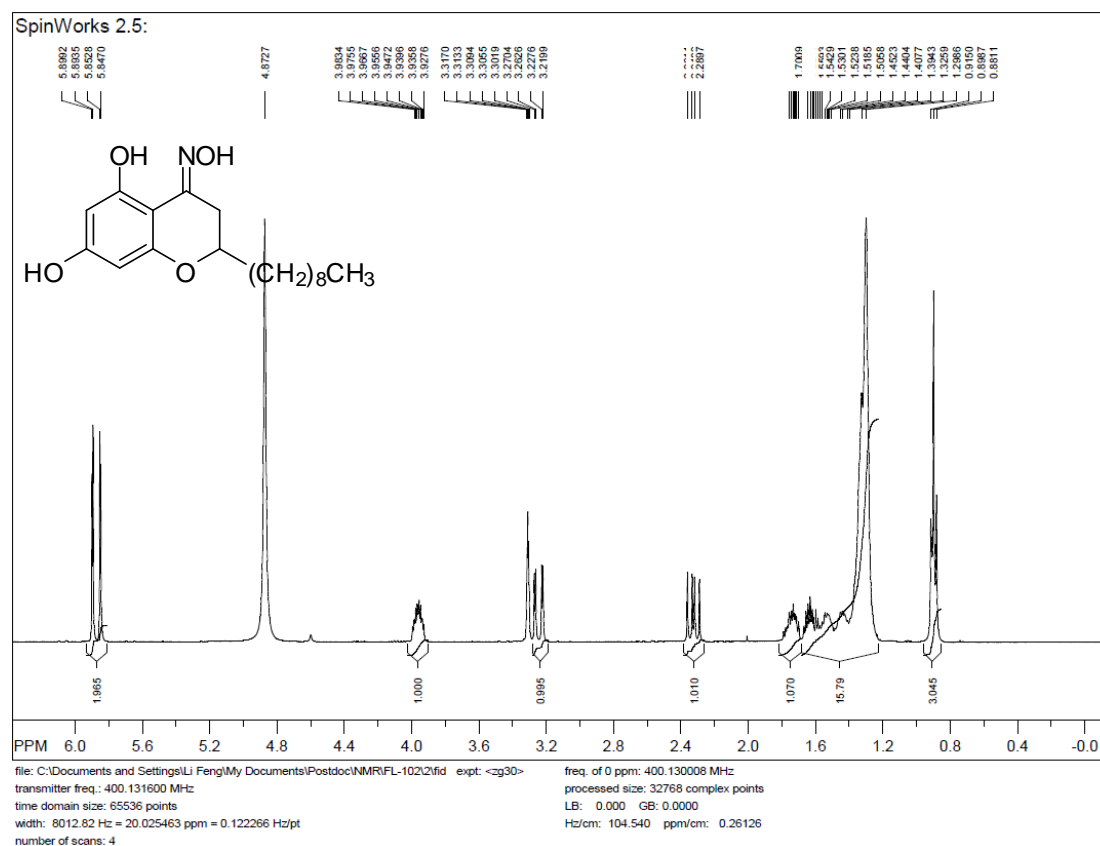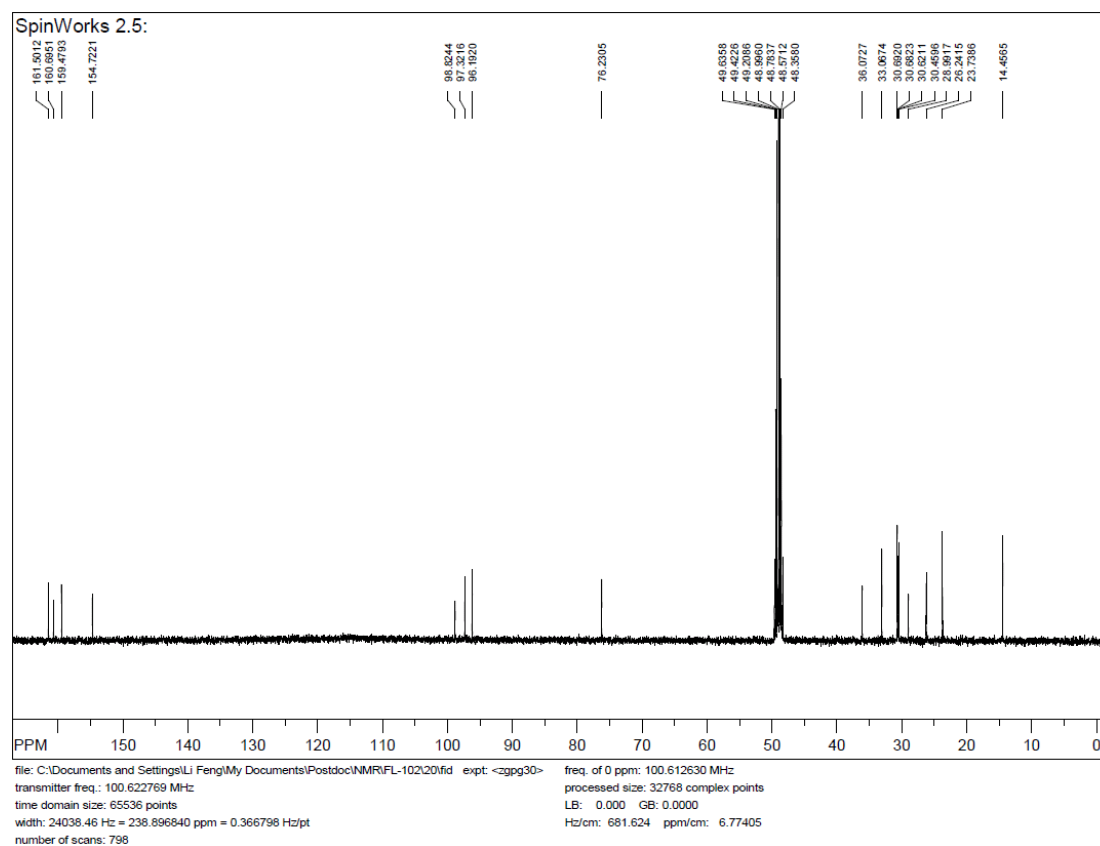

HPLC profile of 6a

==== Shimadzu LCsolution Analysis Report ====

Sample Name : FL-102-P  
 Tray# : 1  
 Vail # : 91  
 Injection Volume : 12 uL  
 Data File Name : FL-102-P.lcd  
 Method File Name : SDQ gradient.lcm  
 Batch File Name :  
 Data Acquired : 12/30/2011 4:20:21 PM

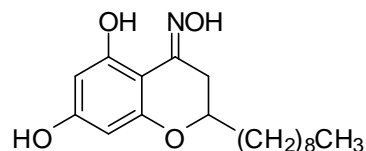

<Chromatogram>

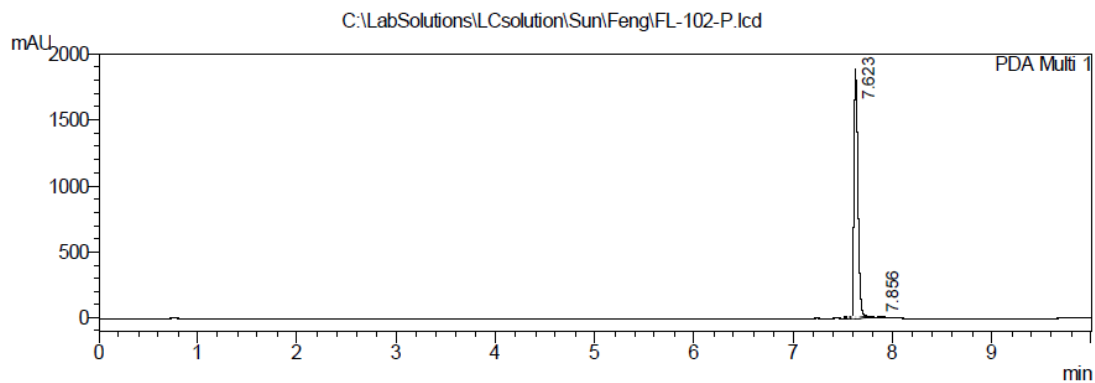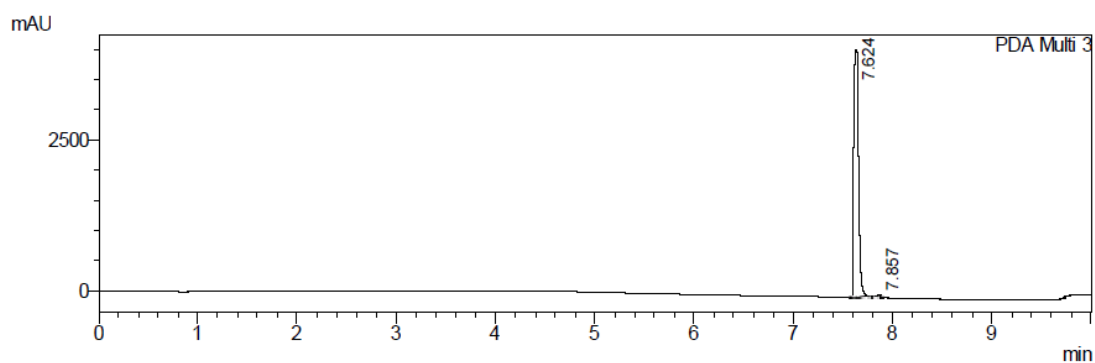

- 1 PDA Multi 1/254nm 4nm
- 2 PDA Multi 3/220nm 4nm

PeakTable

PDA Ch1 254nm 4nm

| Peak# | Ret. Time | Area    | Height  | Area %  | Height % |
|-------|-----------|---------|---------|---------|----------|
| 1     | 7.623     | 4657903 | 1824926 | 99.953  | 99.911   |
| 2     | 7.856     | 2208    | 1623    | 0.047   | 0.089    |
| Total |           | 4660110 | 1826549 | 100.000 | 100.000  |

PeakTable

PDA Ch3 220nm 4nm

| Peak# | Ret. Time | Area     | Height  | Area %  | Height % |
|-------|-----------|----------|---------|---------|----------|
| 1     | 7.624     | 12626929 | 4093039 | 99.515  | 99.252   |
| 2     | 7.857     | 61508    | 30850   | 0.485   | 0.748    |
| Total |           | 12688437 | 4123889 | 100.000 | 100.000  |



# HRMS of 6a

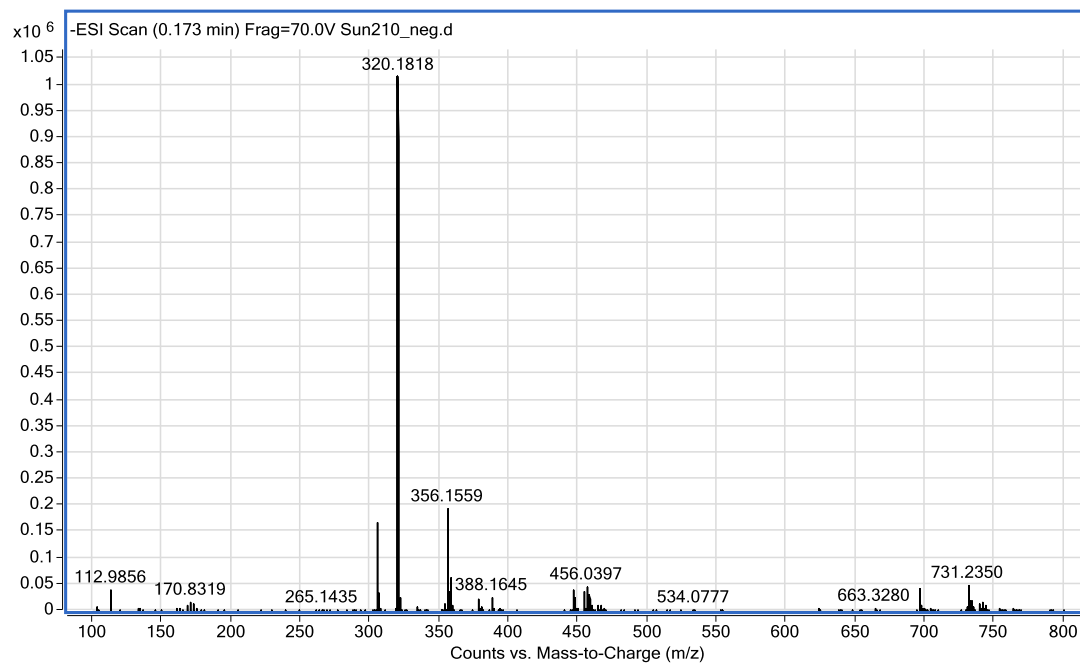

<sup>1</sup>H and <sup>13</sup>C NMR spectra of **6b**

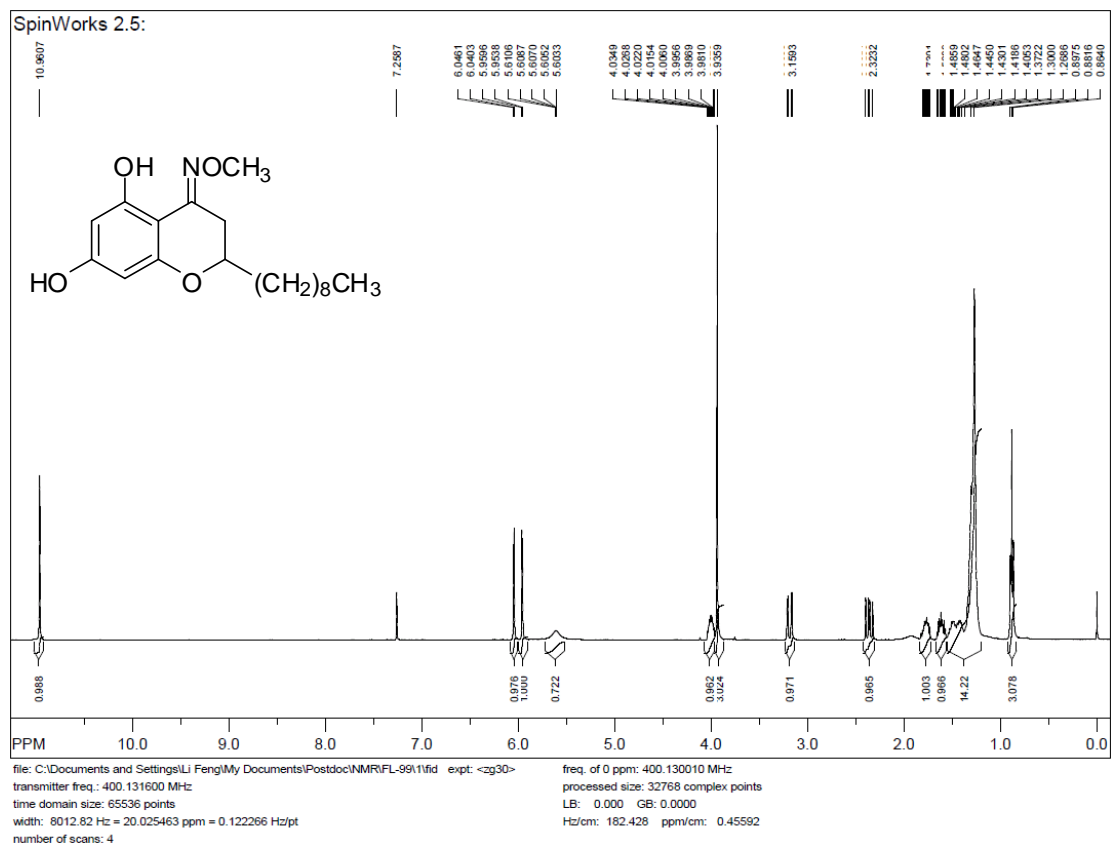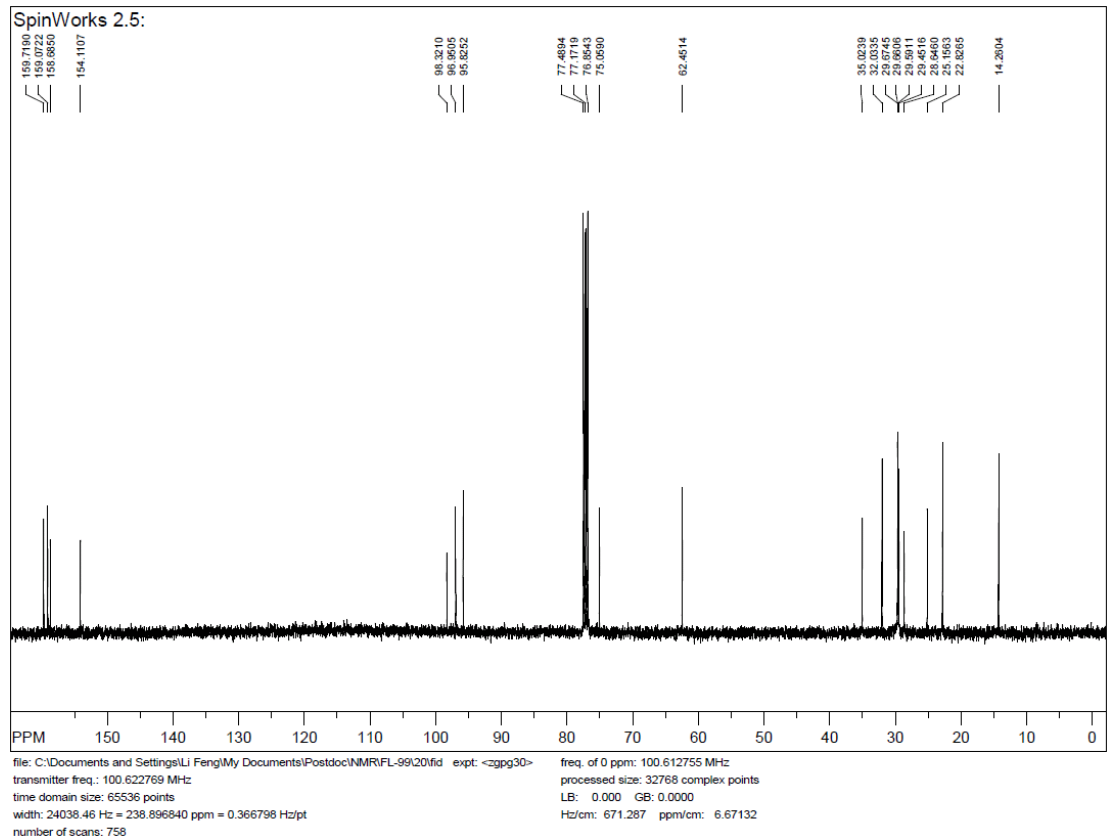

HPLC profile of **6b**

==== Shimadzu LCsolution Analysis Report ====

Sample Name : FL-99-P  
 Tray# : 1  
 Vial # : 91  
 Injection Volume : 6 uL  
 Data File Name : FL-99-P.lcd  
 Method File Name : SDQ gradient.lcm  
 Batch File Name :  
 Data Acquired : 12/22/2011 11:06:10 AM

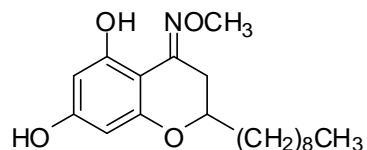

<Chromatogram>

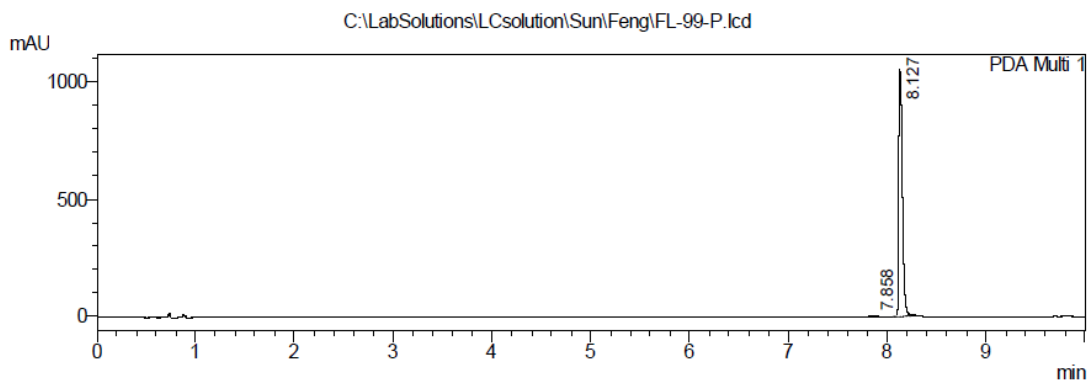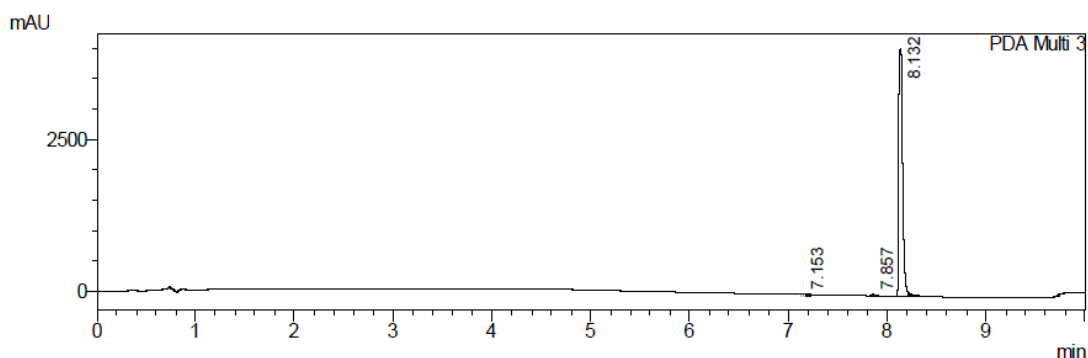

- 1 PDA Multi 1/254nm 4nm
- 2 PDA Multi 3/220nm 4nm

PeakTable

PDA Ch1 254nm 4nm

| Peak# | Ret. Time | Area    | Height  | Area %  | Height % |
|-------|-----------|---------|---------|---------|----------|
| 1     | 7.858     | 5670    | 2701    | 0.219   | 0.264    |
| 2     | 8.127     | 2580357 | 1022083 | 99.781  | 99.736   |
| Total |           | 2586028 | 1024784 | 100.000 | 100.000  |

PeakTable

PDA Ch3 220nm 4nm

| Peak# | Ret. Time | Area     | Height  | Area %  | Height % |
|-------|-----------|----------|---------|---------|----------|
| 1     | 7.153     | 41434    | 14363   | 0.378   | 0.350    |
| 2     | 7.857     | 51559    | 22962   | 0.470   | 0.559    |
| 3     | 8.132     | 10868510 | 4070346 | 99.152  | 99.091   |
| Total |           | 10961502 | 4107671 | 100.000 | 100.000  |

# HRMS of **6b**

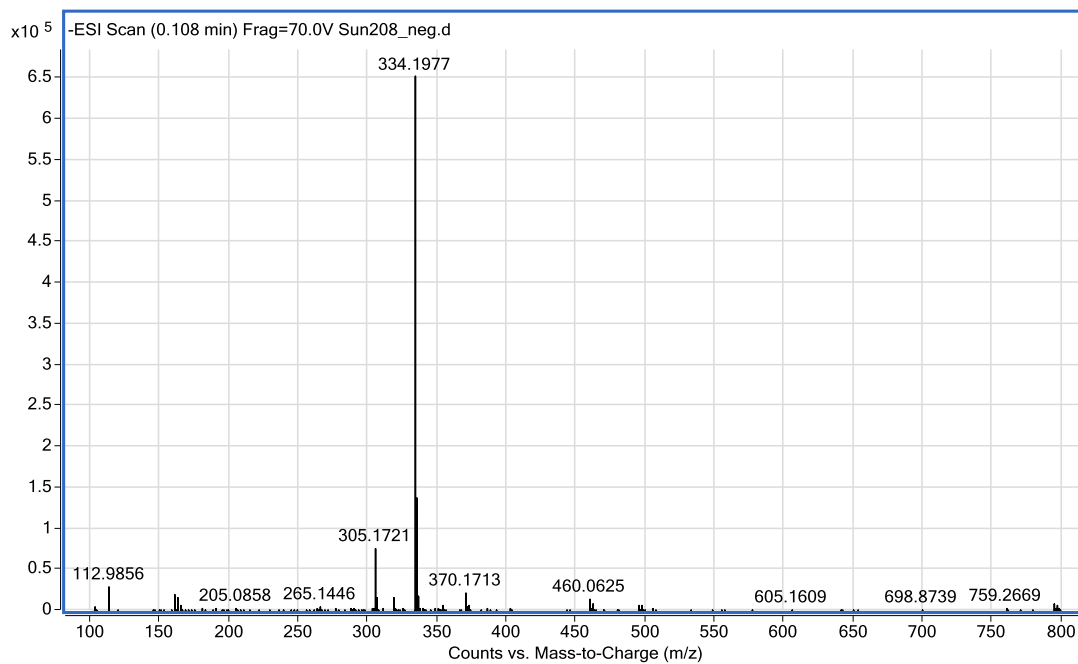

<sup>1</sup>H and <sup>13</sup>C NMR spectra of **6c**

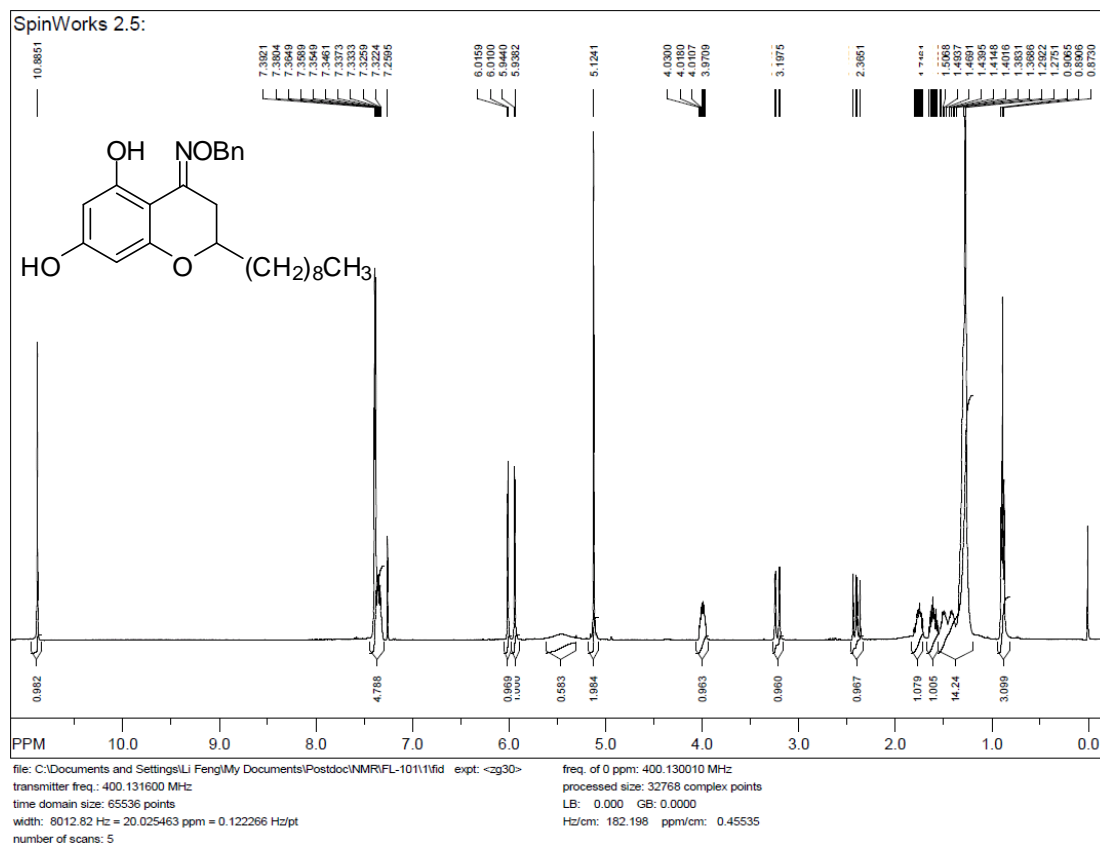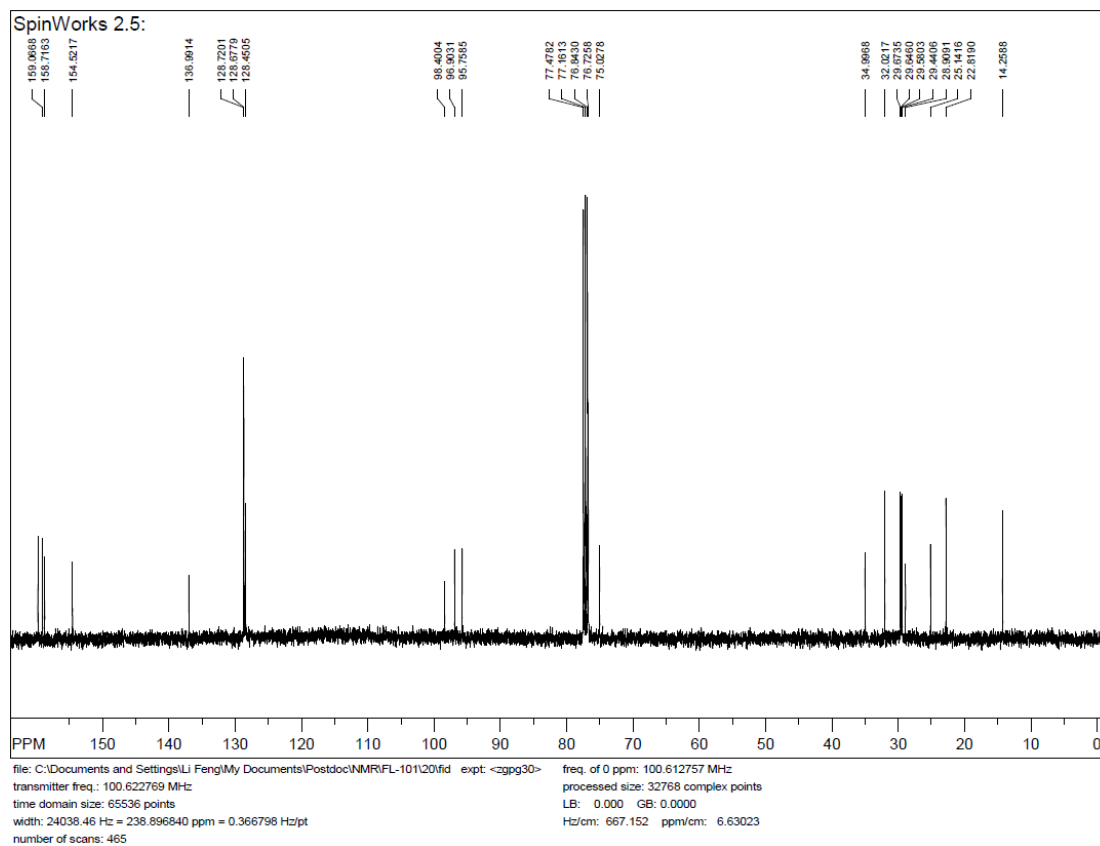

HPLC profile of **6c**

==== Shimadzu LCsolution Analysis Report ====

Sample Name : FL-101-P  
 Tray# : 1  
 Vial # : 91  
 Injection Volume : 12 uL  
 Data File Name : FL-101-P.lcd  
 Method File Name : SDQ gradient.lcm  
 Batch File Name :  
 Data Acquired : 12/27/2011 11:44:01 AM

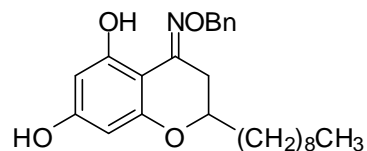

<Chromatogram>

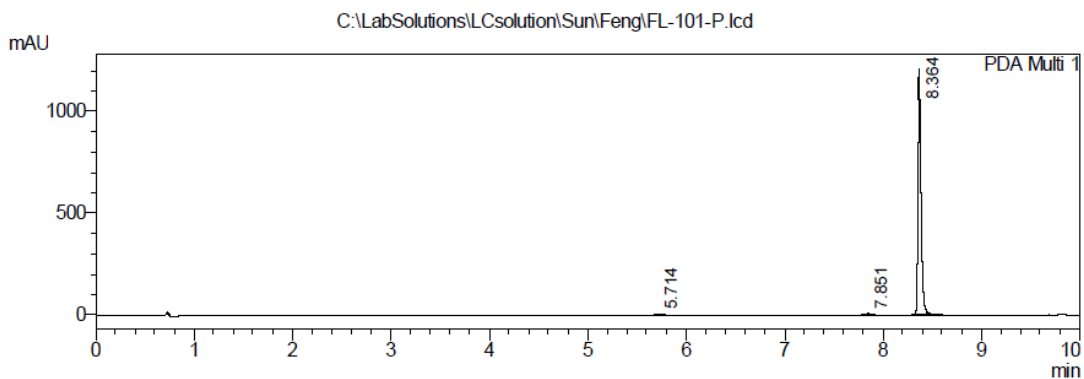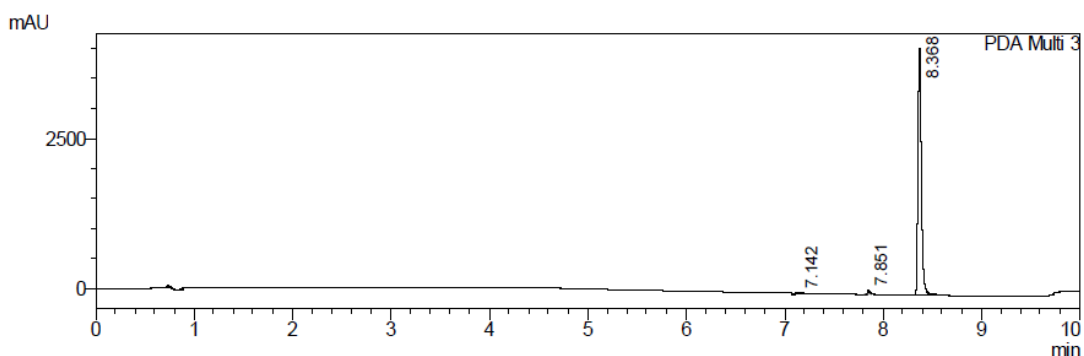

- 1 PDA Multi 1/254nm 4nm
- 2 PDA Multi 3/220nm 4nm

PeakTable

PDA Ch1 254nm 4nm

| Peak# | Ret. Time | Area    | Height  | Area %  | Height % |
|-------|-----------|---------|---------|---------|----------|
| 1     | 5.714     | 9931    | 3362    | 0.333   | 0.276    |
| 2     | 7.851     | 18236   | 8254    | 0.611   | 0.678    |
| 3     | 8.364     | 2957732 | 1206365 | 99.057  | 99.046   |
| Total |           | 2985898 | 1217982 | 100.000 | 100.000  |

PeakTable

PDA Ch3 220nm 4nm

| Peak# | Ret. Time | Area     | Height  | Area %  | Height % |
|-------|-----------|----------|---------|---------|----------|
| 1     | 7.142     | 15147    | 6815    | 0.129   | 0.164    |
| 2     | 7.851     | 142973   | 63995   | 1.214   | 1.537    |
| 3     | 8.368     | 11615362 | 4093380 | 98.657  | 98.300   |
| Total |           | 11773482 | 4164191 | 100.000 | 100.000  |

HRMS of **6c**

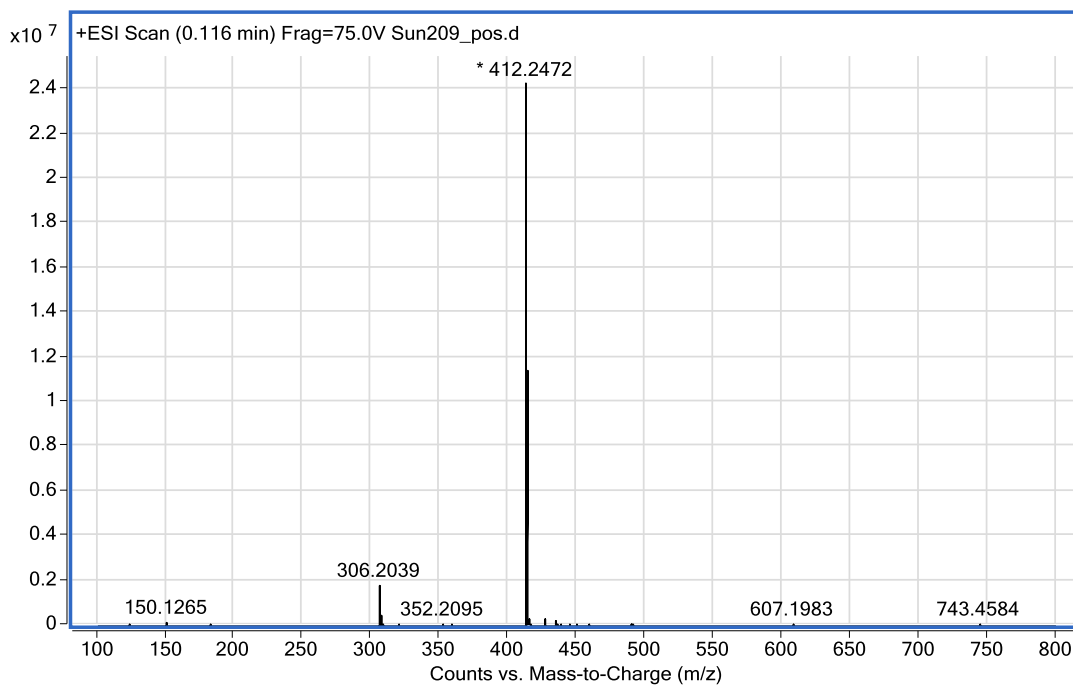

<sup>1</sup>H and <sup>13</sup>C NMR spectra of **6d**

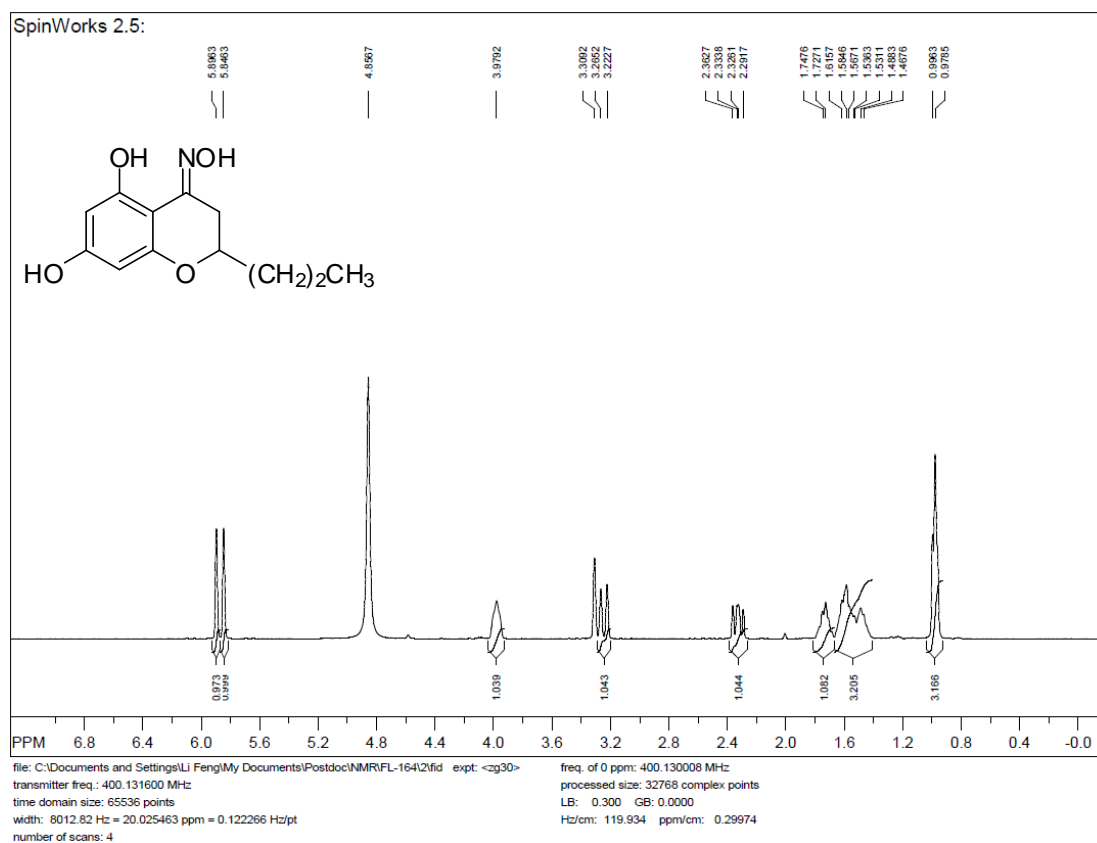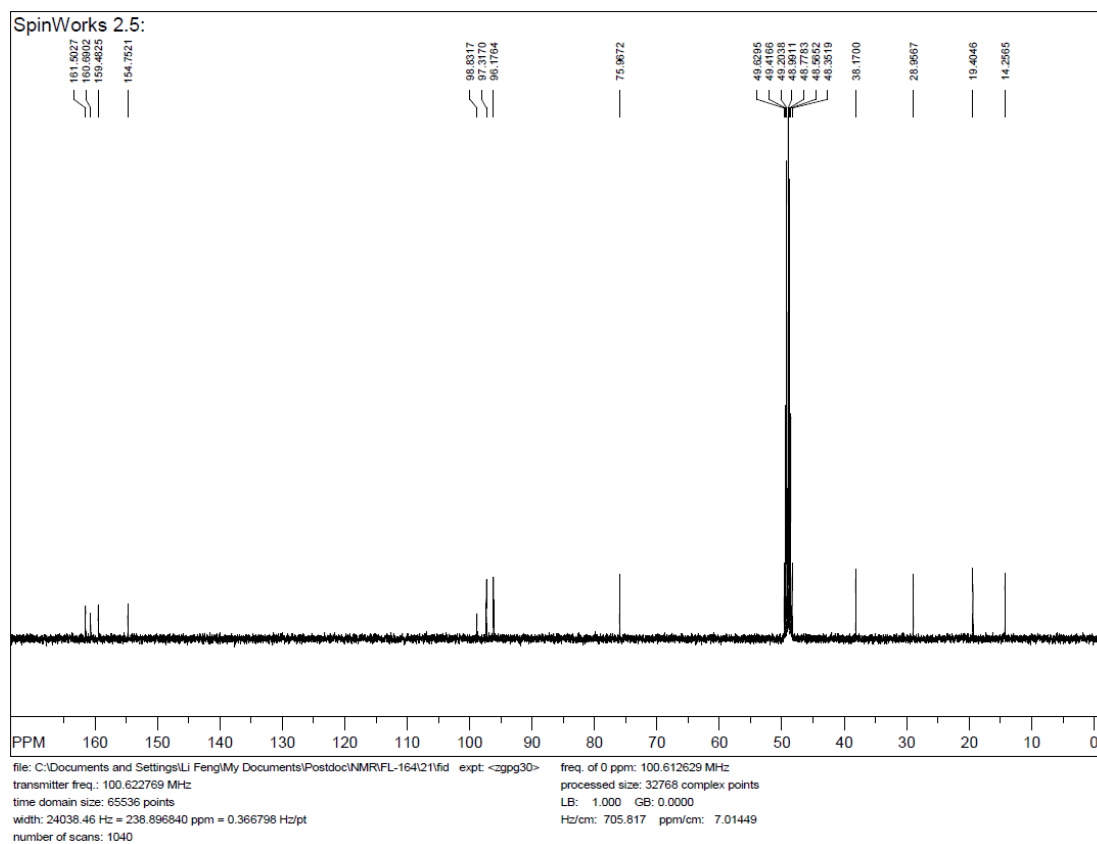



HPLC profile of 6d

==== Shimadzu LCsolution Analysis Report ====

Sample Name : FL-164-P  
 Tray# : 1  
 Vial # : 91  
 Injection Volume : 10 uL  
 Data File Name : FL-164-P.lcd  
 Method File Name : SDQ gradient.lcm  
 Batch File Name : Batch 1.lcb  
 Data Acquired : 3/8/2012 12:24:24 PM

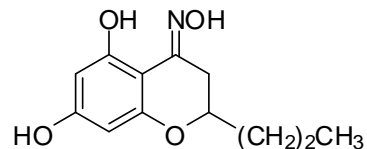

<Chromatogram>

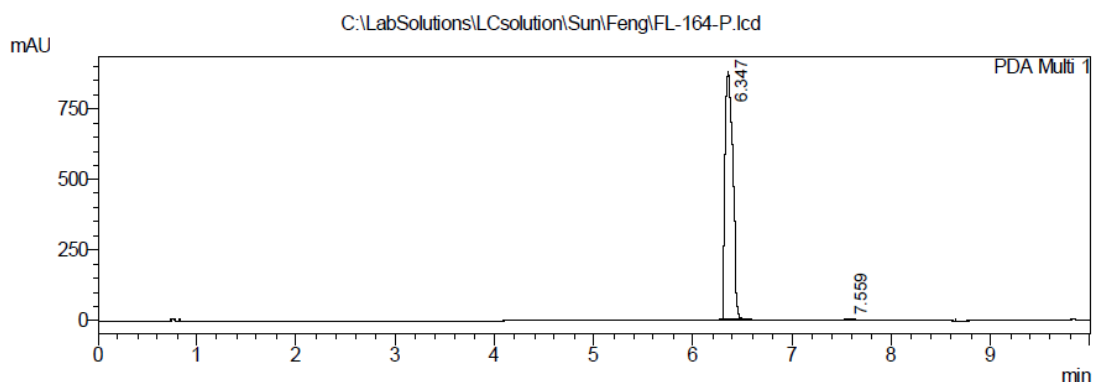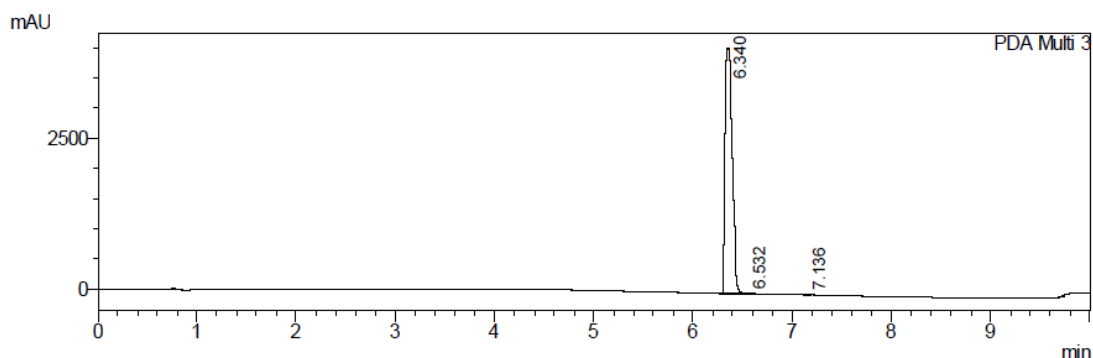

- 1 PDA Multi 1/254nm 4nm
- 2 PDA Multi 3/220nm 4nm

PeakTable

PDA Ch1 254nm 4nm

| Peak# | Ret. Time | Area    | Height | Area %  | Height % |
|-------|-----------|---------|--------|---------|----------|
| 1     | 6.347     | 4577805 | 882105 | 99.924  | 99.893   |
| 2     | 7.559     | 3477    | 943    | 0.076   | 0.107    |
| Total |           | 4581282 | 883048 | 100.000 | 100.000  |

PeakTable

PDA Ch3 220nm 4nm

| Peak# | Ret. Time | Area     | Height  | Area %  | Height % |
|-------|-----------|----------|---------|---------|----------|
| 1     | 6.340     | 19049401 | 4058134 | 99.960  | 99.955   |
| 2     | 6.532     | 4522     | 617     | 0.024   | 0.015    |
| 3     | 7.136     | 3117     | 1195    | 0.016   | 0.029    |
| Total |           | 19057041 | 4059946 | 100.000 | 100.000  |

# HRMS of 6d

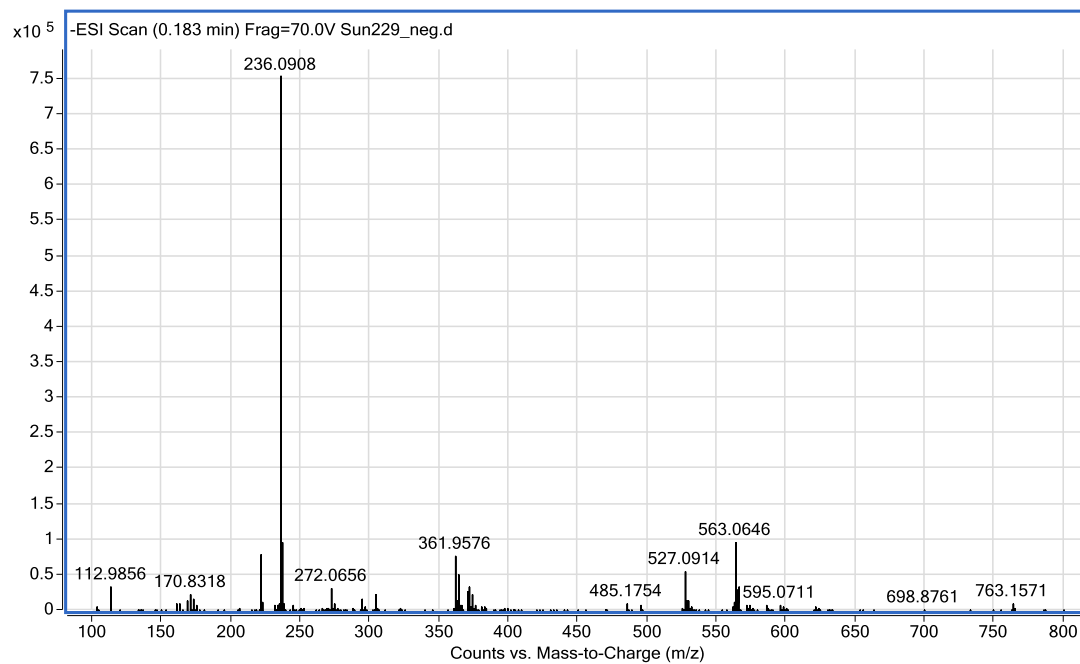

$^1\text{H}$  and  $^{13}\text{C}$  NMR spectra of **6e**

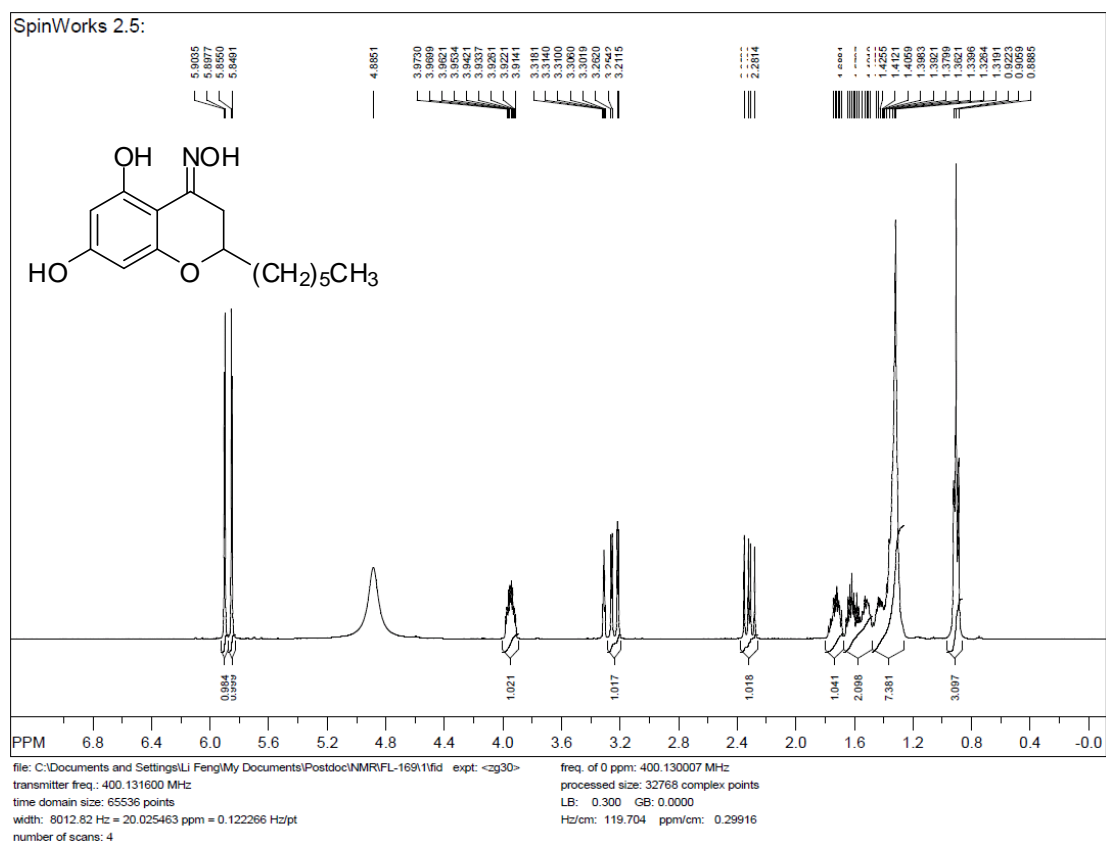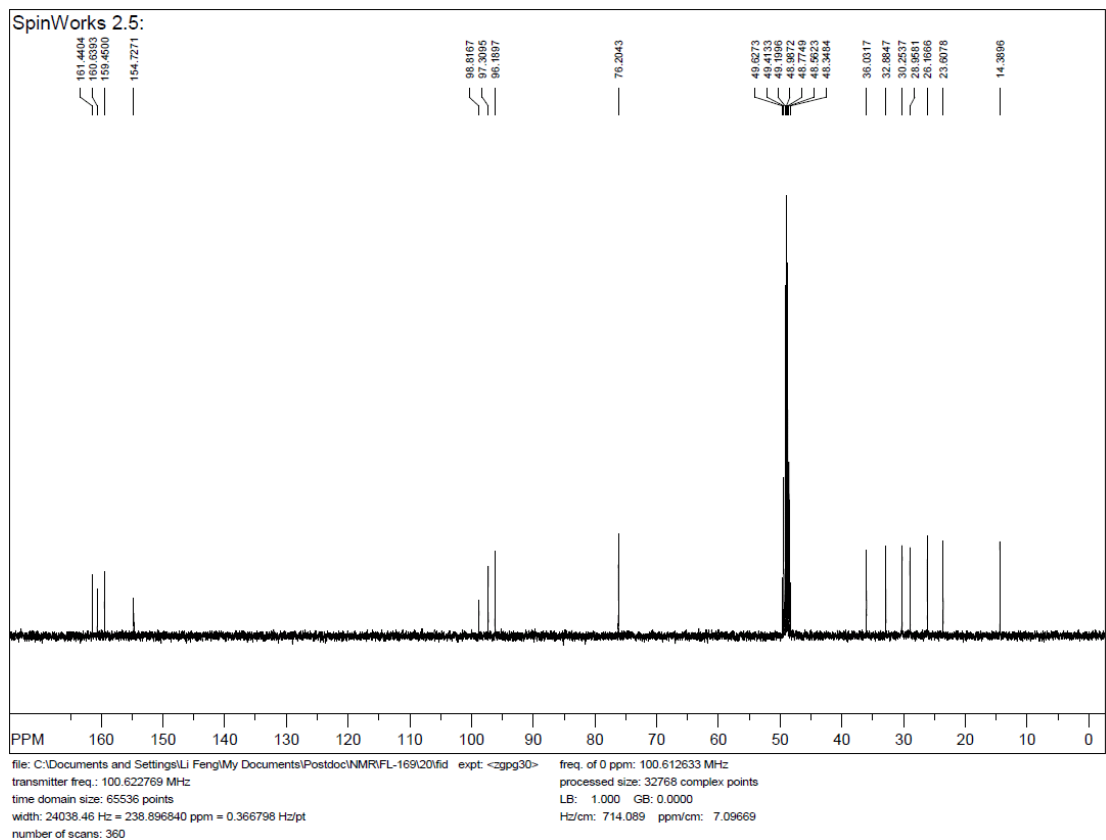

HPLC profile of 6e

==== Shimadzu LCsolution Analysis Report ====

Sample Name : FL-169-P  
 Tray# : 1  
 Vail # : 93  
 Injection Volume : 10 uL  
 Data File Name : FL-169-P.lcd  
 Method File Name : SDQ gradient.lcm  
 Batch File Name : Batch 1.lcb  
 Data Acquired : 3/8/2012 12:45:17 PM

C:\LabSolutions\LCsolution\Sun\Feng\FL-169-P.lcd

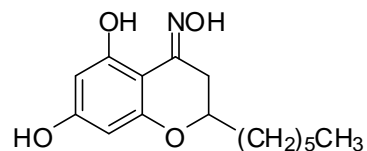

<Chromatogram>

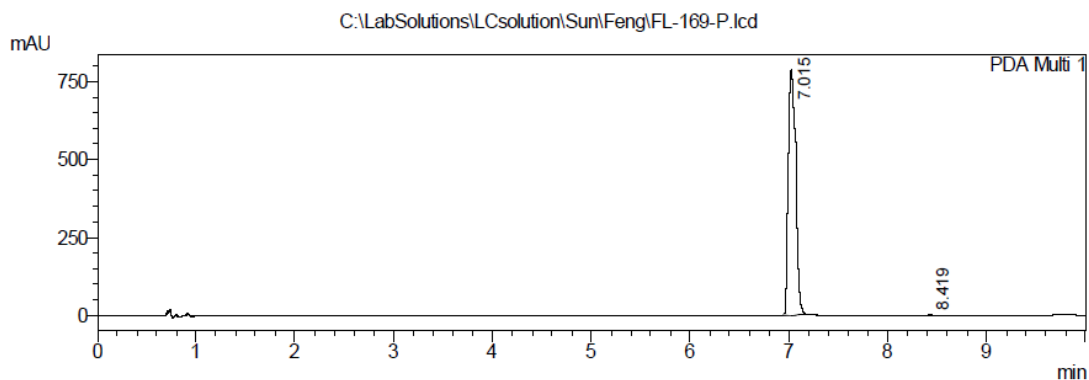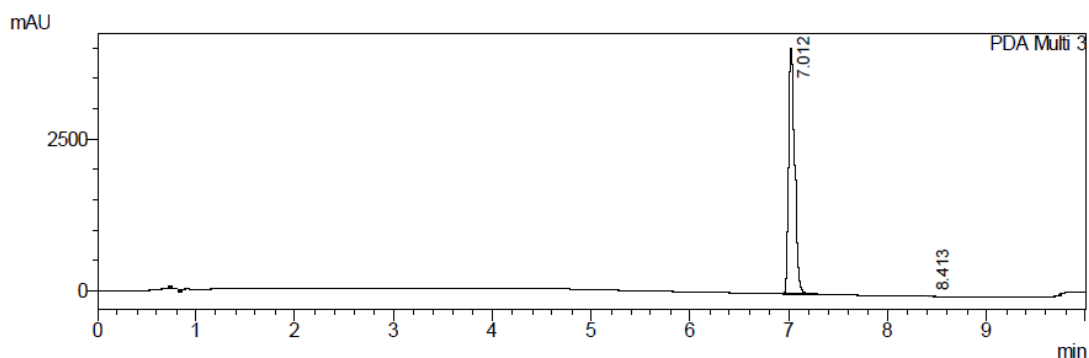

- 1 PDA Multi 1/254nm 4nm
- 2 PDA Multi 3/220nm 4nm

PeakTable

PDA Ch1 254nm 4nm

| Peak# | Ret. Time | Area    | Height | Area %  | Height % |
|-------|-----------|---------|--------|---------|----------|
| 1     | 7.015     | 4095196 | 784863 | 99.776  | 99.768   |
| 2     | 8.419     | 9180    | 1824   | 0.224   | 0.232    |
| Total |           | 4104377 | 786687 | 100.000 | 100.000  |

PeakTable

PDA Ch3 220nm 4nm

| Peak# | Ret. Time | Area     | Height  | Area %  | Height % |
|-------|-----------|----------|---------|---------|----------|
| 1     | 7.012     | 16956366 | 4040211 | 99.959  | 99.954   |
| 2     | 8.413     | 7015     | 1878    | 0.041   | 0.046    |
| Total |           | 16963381 | 4042089 | 100.000 | 100.000  |

# HRMS of 6e

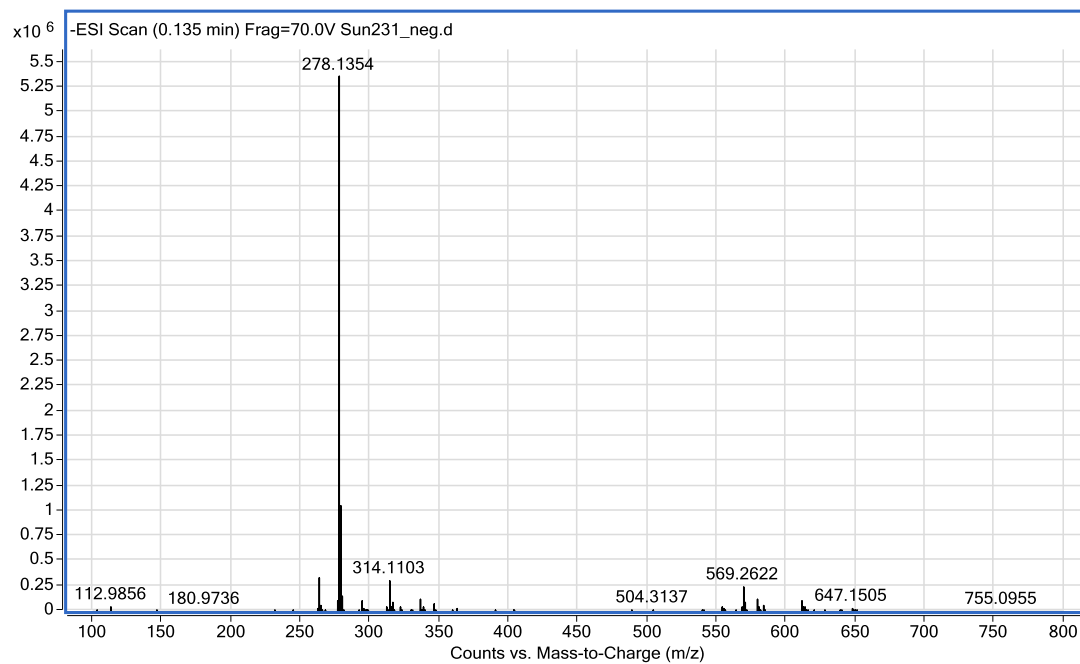

<sup>1</sup>H and <sup>13</sup>C NMR spectra of **6f**

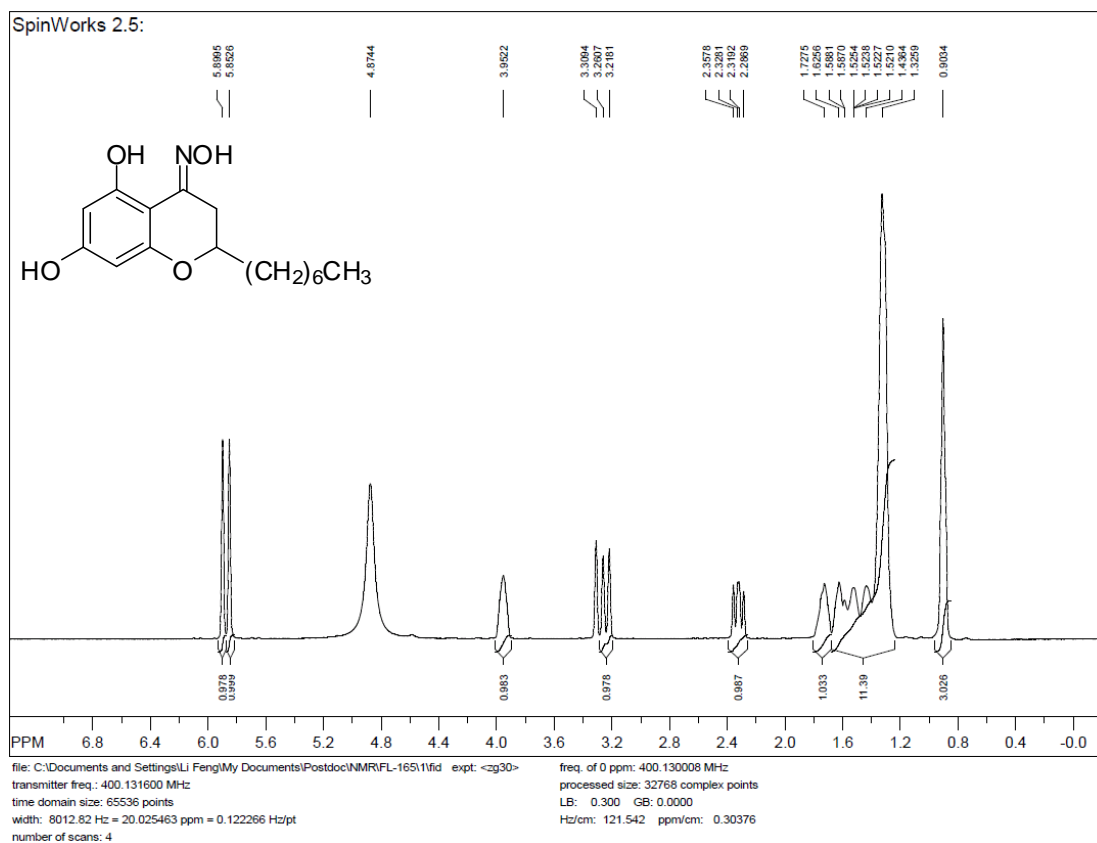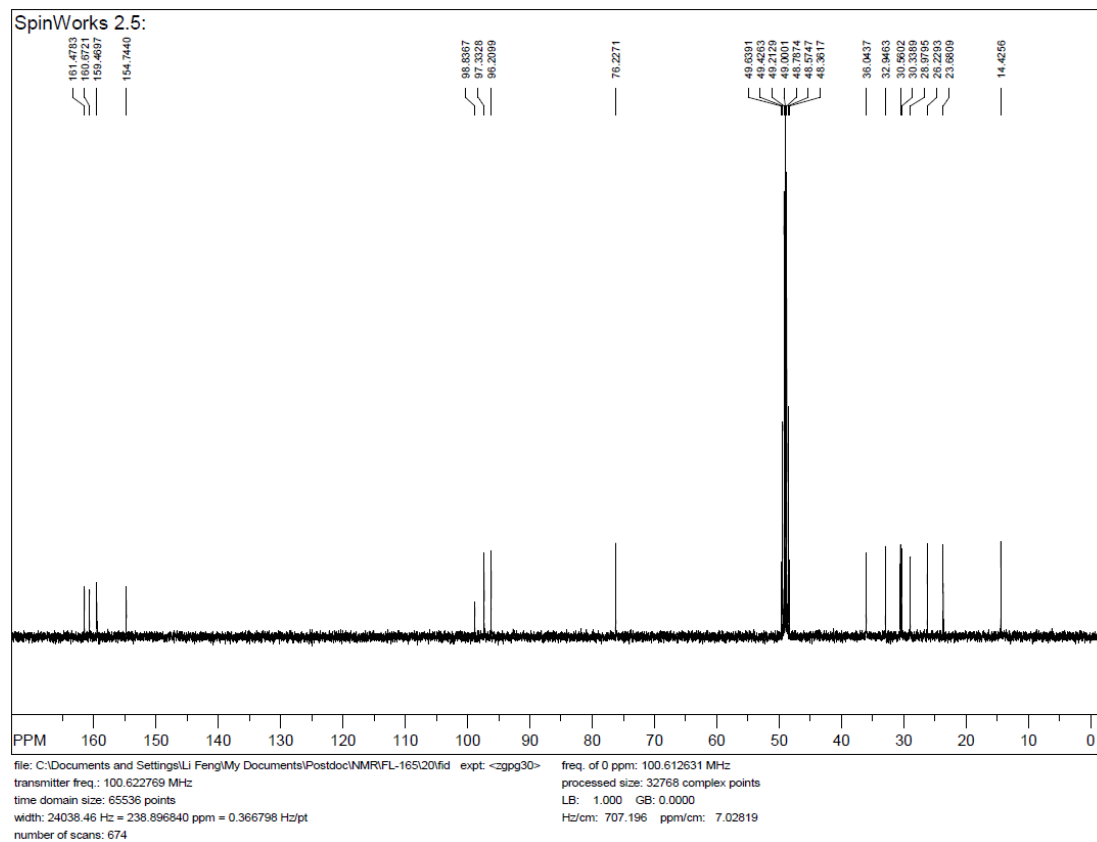

HPLC profile of **6f**

==== Shimadzu LCsolution Analysis Report ====

Sample Name : FL-165-P  
 Tray# : 1  
 Vial # : 92  
 Injection Volume : 10 uL  
 Data File Name : FL-165-P.lcd  
 Method File Name : SDQ gradient.lcm  
 Batch File Name : Batch 1.lcb  
 Data Acquired : 3/8/2012 12:34:51 PM

C:\LabSolutions\LCsolution\Sun\Feng\FL-165-P.lcd

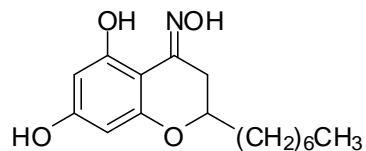

<Chromatogram>

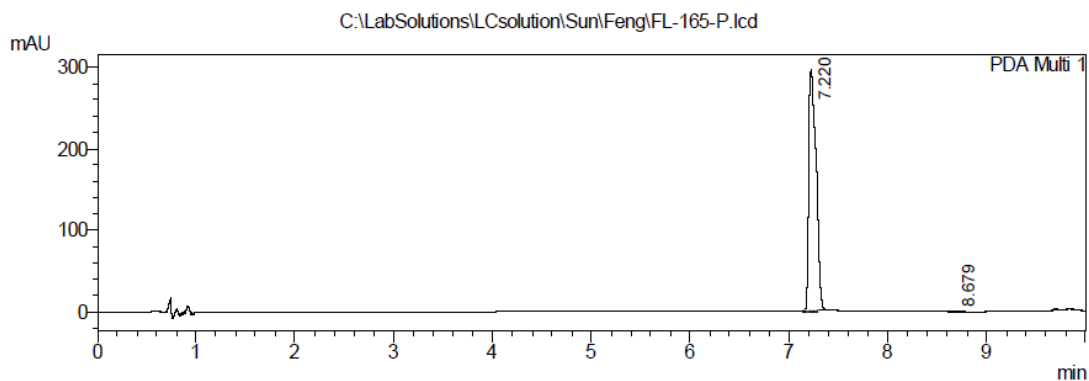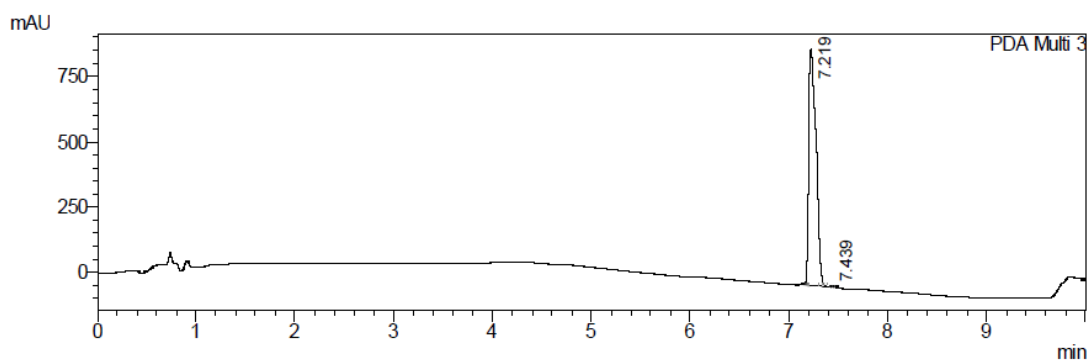

- 1 PDA Multi 1/254nm 4nm
- 2 PDA Multi 3/220nm 4nm

PeakTable

PDA Ch1 254nm 4nm

| Peak# | Ret. Time | Area    | Height | Area %  | Height % |
|-------|-----------|---------|--------|---------|----------|
| 1     | 7.220     | 1543111 | 295890 | 99.859  | 99.845   |
| 2     | 8.679     | 2184    | 461    | 0.141   | 0.155    |
| Total |           | 1545295 | 296350 | 100.000 | 100.000  |

PeakTable

PDA Ch3 220nm 4nm

| Peak# | Ret. Time | Area    | Height | Area %  | Height % |
|-------|-----------|---------|--------|---------|----------|
| 1     | 7.219     | 4647097 | 900043 | 99.848  | 99.770   |
| 2     | 7.439     | 7077    | 2079   | 0.152   | 0.230    |
| Total |           | 4654174 | 902122 | 100.000 | 100.000  |

# HRMS of 6f

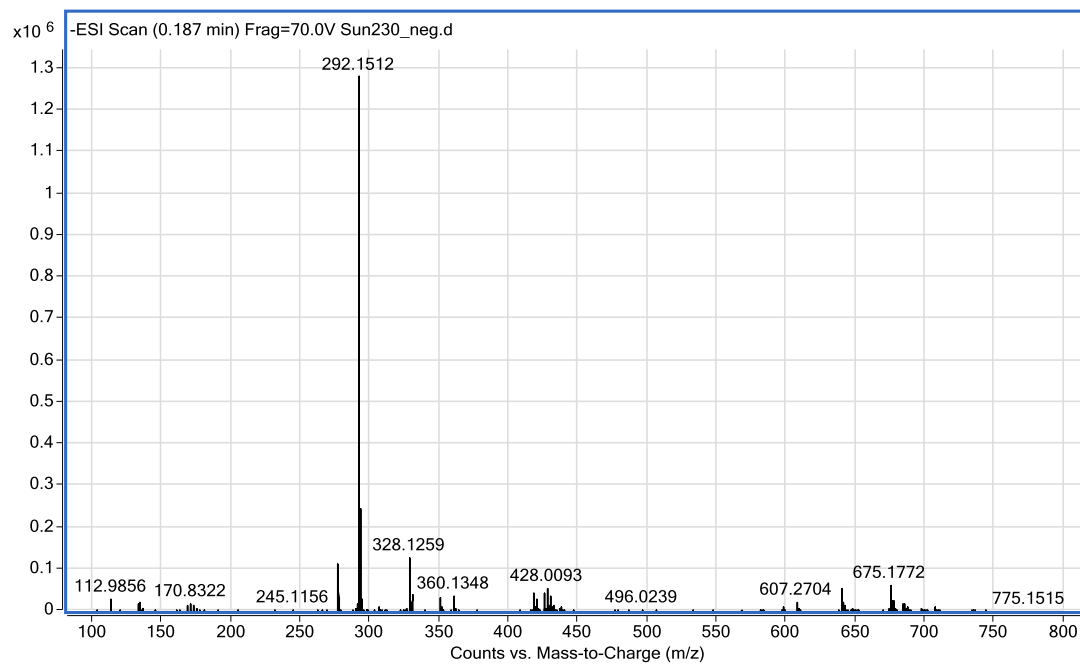



$^1\text{H}$  and  $^{13}\text{C}$  NMR spectra of **7a**

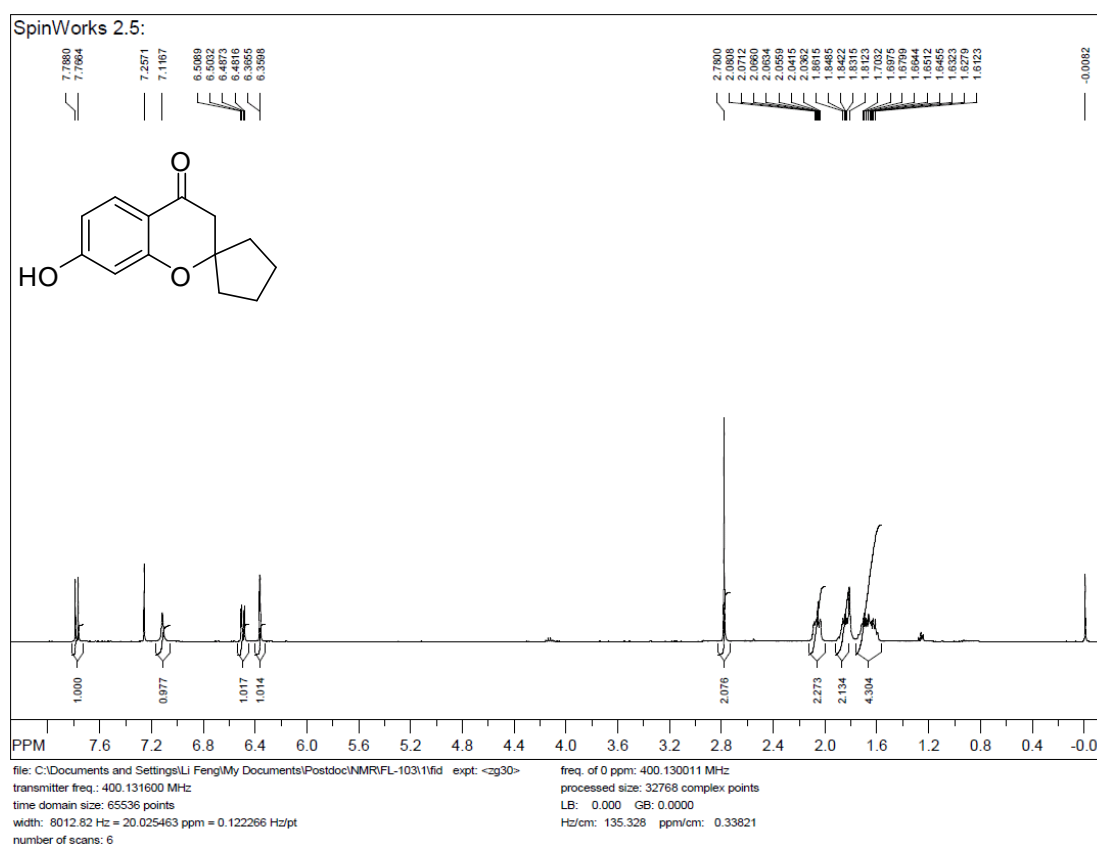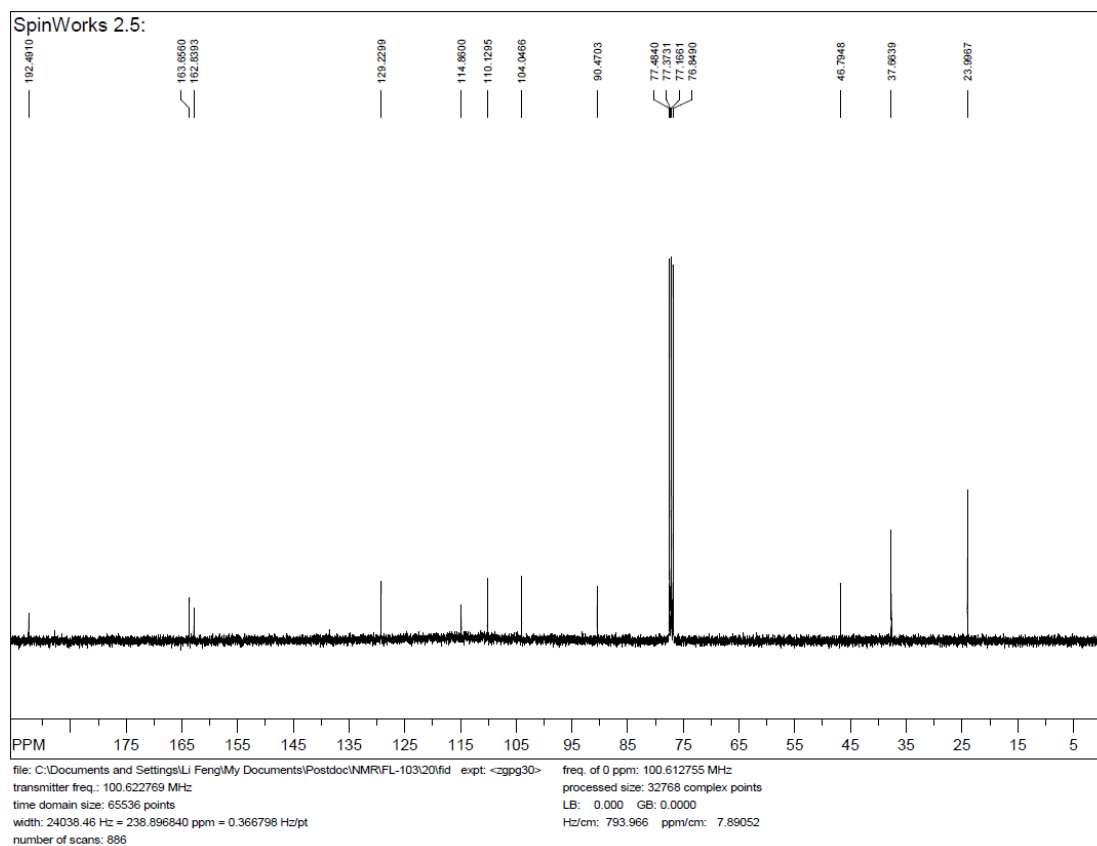

HPLC profile of 7a

## ==== Shimadzu LCsolution Analysis Report ====

Sample Name : FL-103-P  
 Tray# : 1  
 Vial # : 91  
 Injection Volume : 10 uL  
 Data File Name : FL-103-P.lcd  
 Method File Name : SDQ gradient.lcm  
 Batch File Name :  
 Data Acquired : 12/30/2011 12:34:18 PM

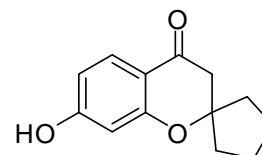

### <Chromatogram>

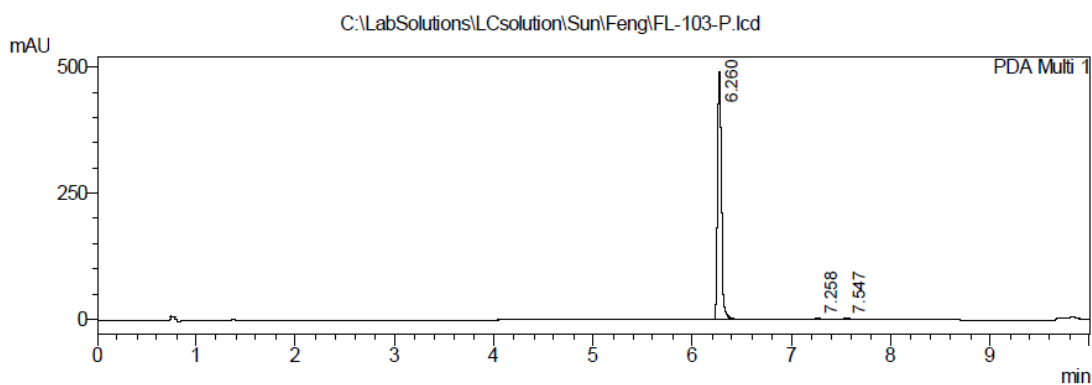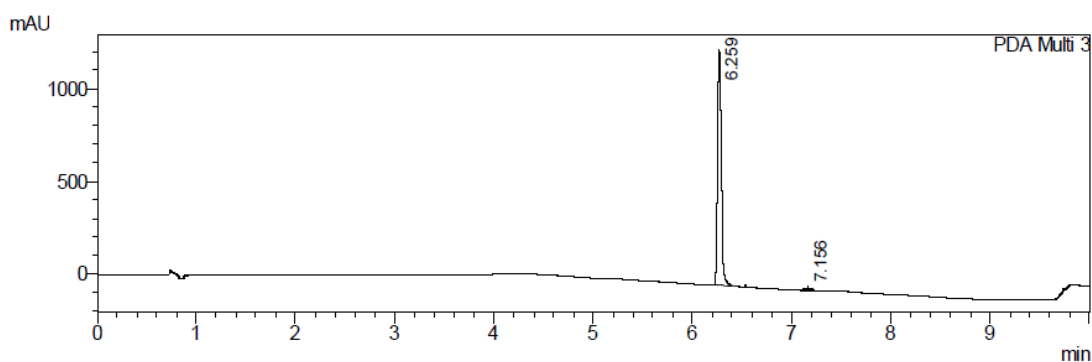

- 1 PDA Multi 1/254nm 4nm
- 2 PDA Multi 3/220nm 4nm

PeakTable

PDA Ch1 254nm 4nm

| Peak# | Ret. Time | Area    | Height | Area %  | Height % |
|-------|-----------|---------|--------|---------|----------|
| 1     | 6.260     | 1282041 | 490535 | 99.066  | 98.940   |
| 2     | 7.258     | 6268    | 2927   | 0.484   | 0.590    |
| 3     | 7.547     | 5823    | 2327   | 0.450   | 0.469    |
| Total |           | 1294132 | 495790 | 100.000 | 100.000  |

PeakTable

PDA Ch3 220nm 4nm

| Peak# | Ret. Time | Area    | Height  | Area %  | Height % |
|-------|-----------|---------|---------|---------|----------|
| 1     | 6.259     | 3187173 | 1271963 | 98.659  | 98.951   |
| 2     | 7.156     | 43331   | 13486   | 1.341   | 1.049    |
| Total |           | 3230504 | 1285449 | 100.000 | 100.000  |

# HRMS of 7a

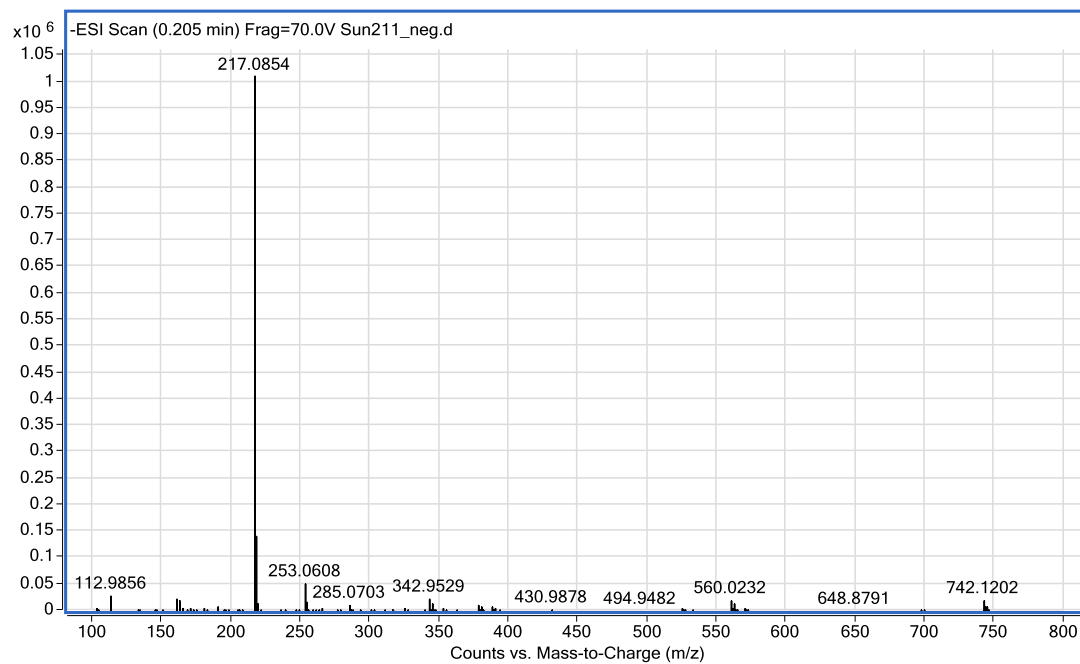

$^1\text{H}$  and  $^{13}\text{C}$  NMR spectra of **7b**

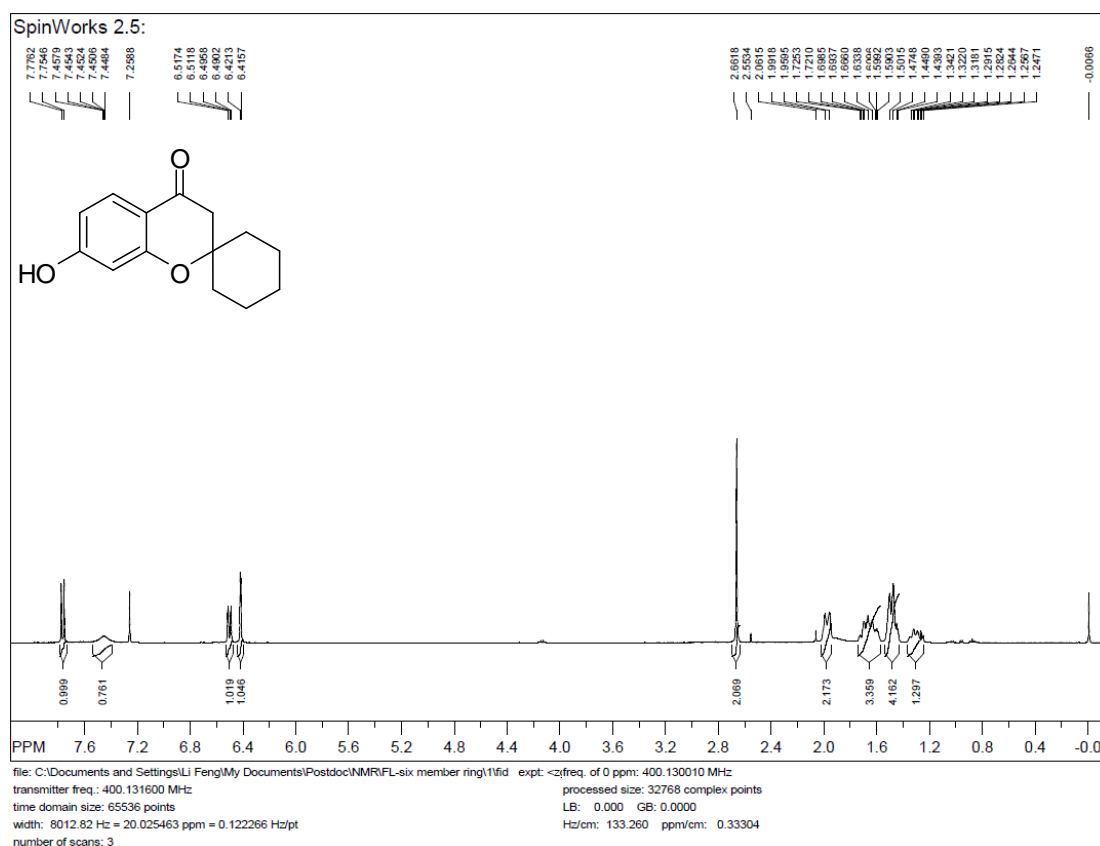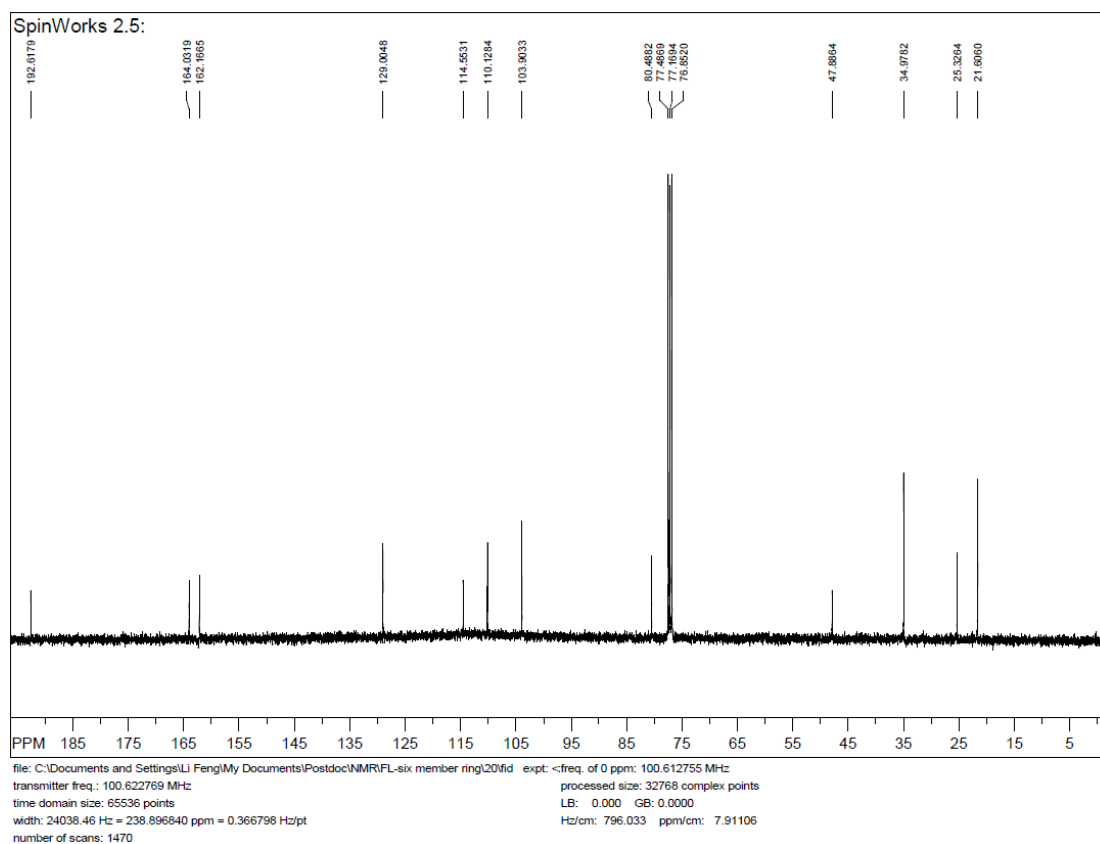

HPLC profile of 7b

==== Shimadzu LCsolution Analysis Report ====

Sample Name : FL-six member ring-P  
 Tray# : 1  
 Vial # : 91  
 Injection Volume : 8 uL  
 Data File Name : FL-six member ring-P.lcd  
 Method File Name : SDQ gradient.lcm  
 Batch File Name :  
 Data Acquired : 1/4/2012 11:20:49 AM

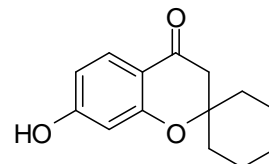

<Chromatogram>

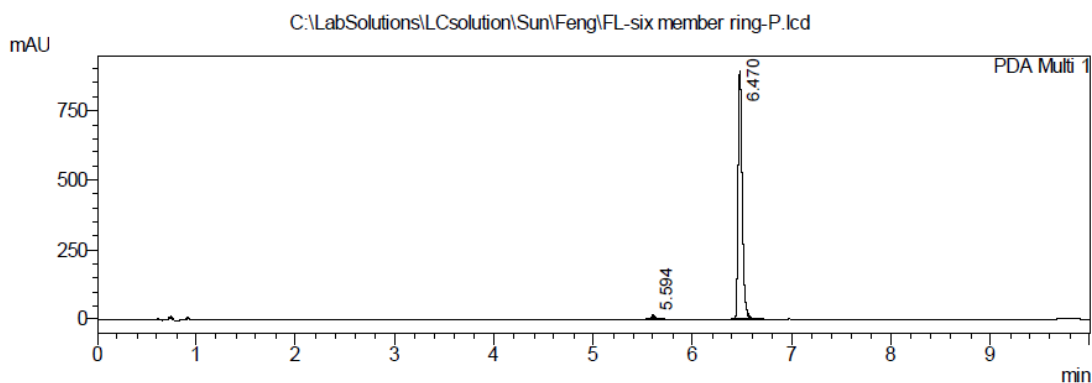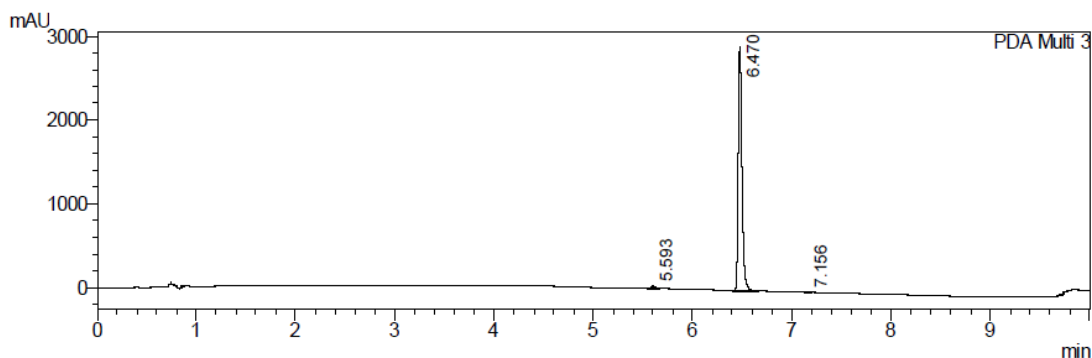

- 1 PDA Multi 1/254nm 4nm
- 2 PDA Multi 3/220nm 4nm

PeakTable

PDA Ch1 254nm 4nm

| Peak# | Ret. Time | Area    | Height | Area %  | Height % |
|-------|-----------|---------|--------|---------|----------|
| 1     | 5.594     | 41671   | 15246  | 1.777   | 1.710    |
| 2     | 6.470     | 2303034 | 876593 | 98.223  | 98.290   |
| Total |           | 2344705 | 891839 | 100.000 | 100.000  |

PeakTable

PDA Ch3 220nm 4nm

| Peak# | Ret. Time | Area    | Height  | Area %  | Height % |
|-------|-----------|---------|---------|---------|----------|
| 1     | 5.593     | 64580   | 25820   | 0.949   | 0.876    |
| 2     | 6.470     | 6722305 | 2914502 | 98.752  | 98.841   |
| 3     | 7.156     | 20377   | 8359    | 0.299   | 0.283    |
| Total |           | 6807262 | 2948681 | 100.000 | 100.000  |

# HRMS of 7b

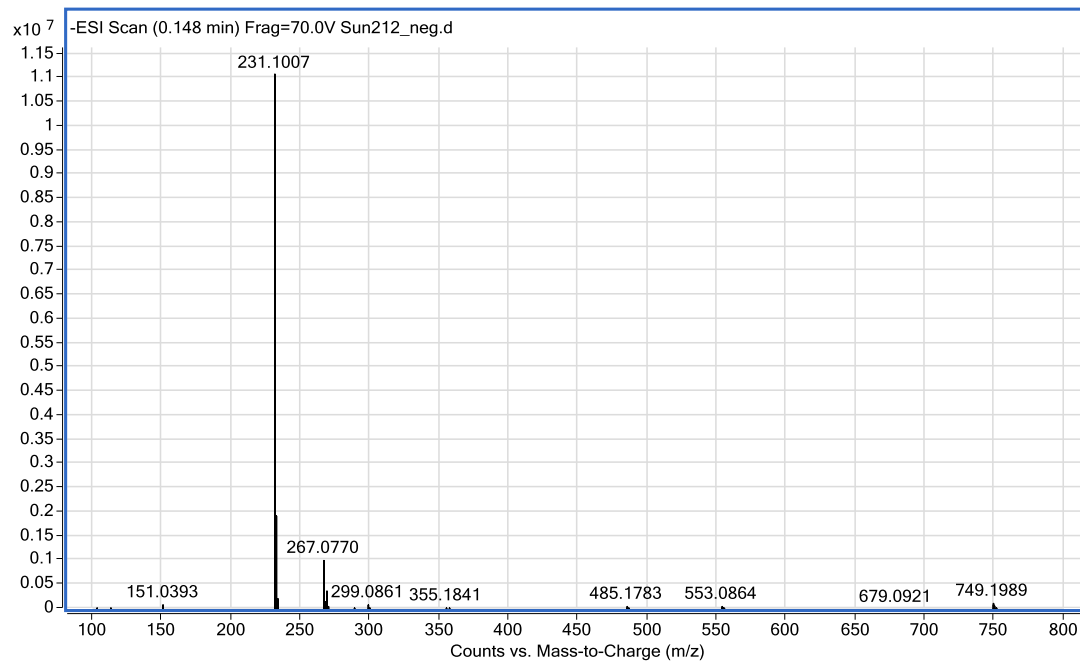

$^1\text{H}$  and  $^{13}\text{C}$  NMR spectra of **7c**

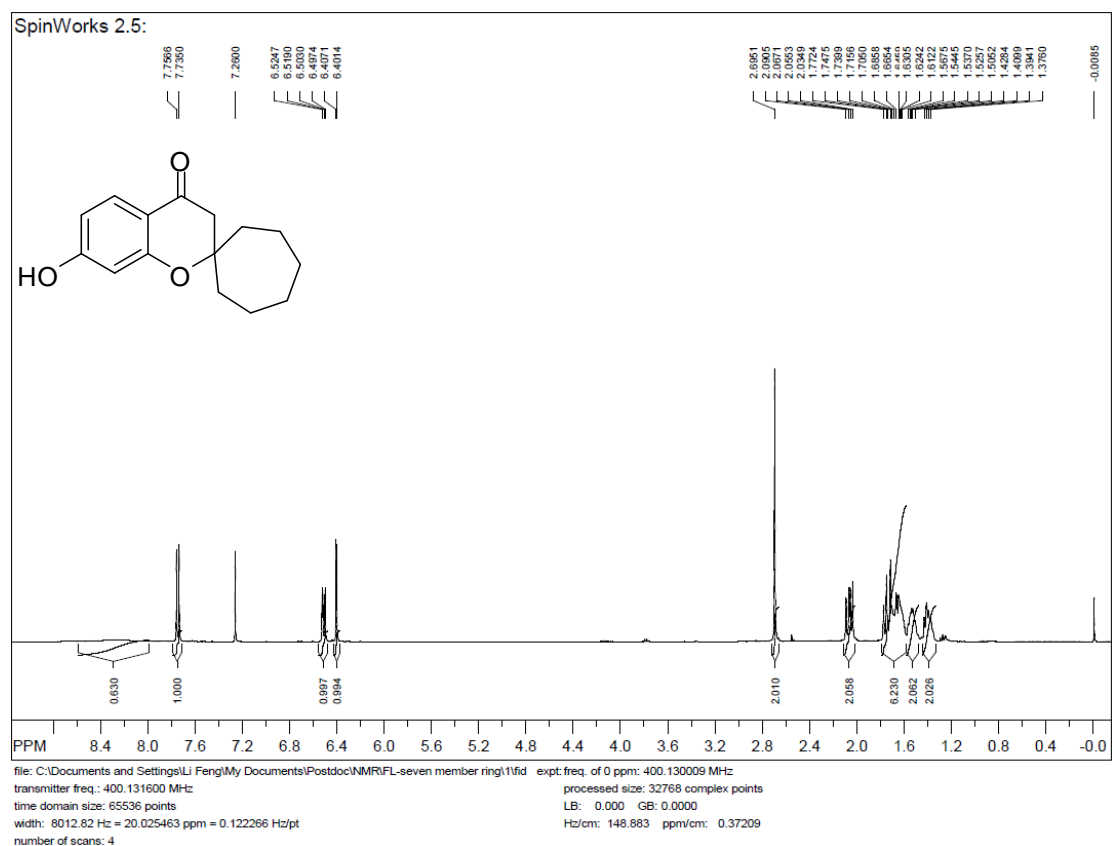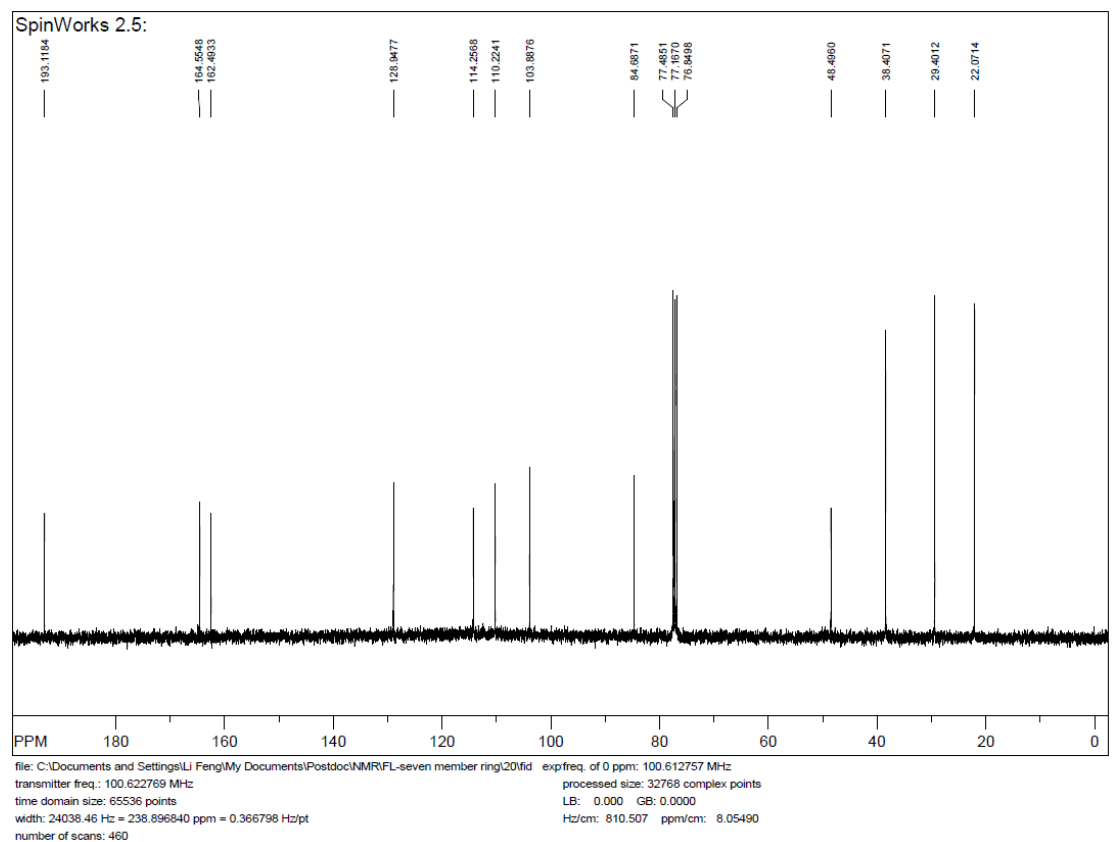

HPLC profile of 7c

## ==== Shimadzu LCsolution Analysis Report ====

Sample Name : C:\LabSolutions\LCsolution\Sun\Feng\FL-seven member ring-P.lcd  
 : FL-seven member ring-P  
 Tray# : 1  
 Vial# : 91  
 Injection Volume : 10 uL  
 Data File Name : FL-seven member ring-P.lcd  
 Method File Name : SDQ gradient.lcm  
 Batch File Name :  
 Data Acquired : 1/3/2012 5:00:52 PM

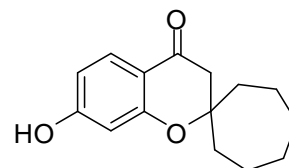

### <Chromatogram>

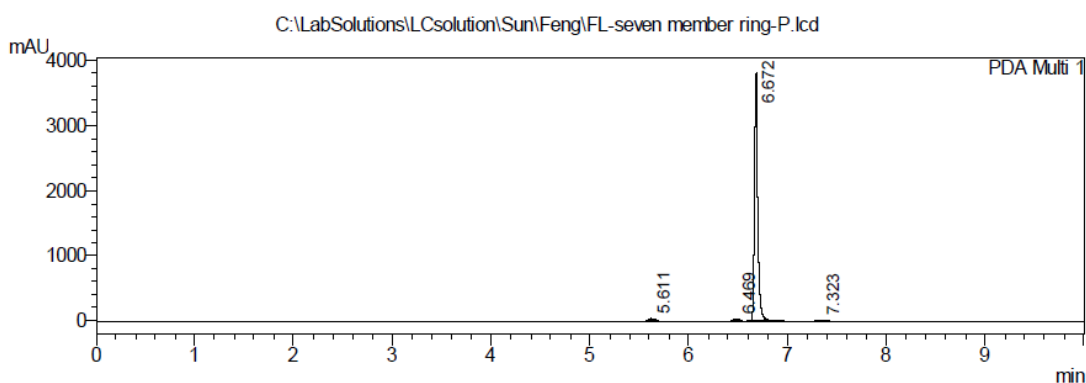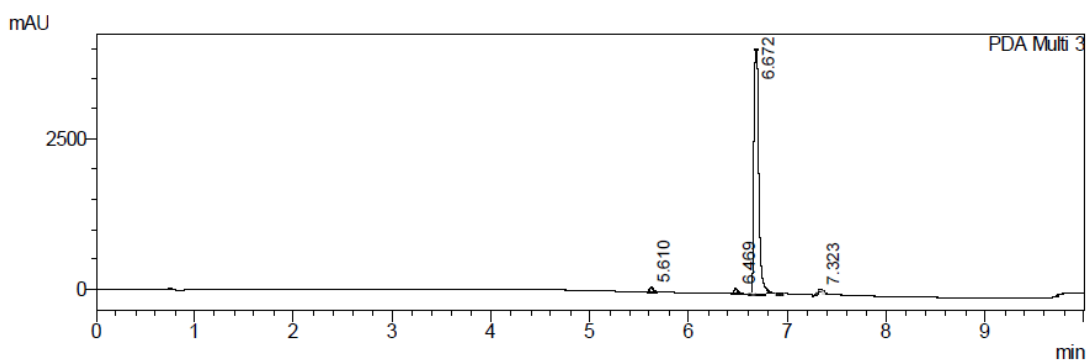

- 1 PDA Multi 1/254nm 4nm
- 2 PDA Multi 3/220nm 4nm

PeakTable

PDA Ch1 254nm 4nm

| Peak# | Ret. Time | Area     | Height  | Area %  | Height % |
|-------|-----------|----------|---------|---------|----------|
| 1     | 5.611     | 110221   | 41408   | 1.076   | 1.098    |
| 2     | 6.469     | 81938    | 34438   | 0.800   | 0.913    |
| 3     | 6.672     | 9978682  | 3675941 | 97.415  | 97.503   |
| 4     | 7.323     | 72684    | 18284   | 0.710   | 0.485    |
| Total |           | 10243525 | 3770071 | 100.000 | 100.000  |

PeakTable

PDA Ch3 220nm 4nm

| Peak# | Ret. Time | Area     | Height  | Area %  | Height % |
|-------|-----------|----------|---------|---------|----------|
| 1     | 5.610     | 170952   | 69024   | 1.080   | 1.620    |
| 2     | 6.469     | 192009   | 80053   | 1.214   | 1.878    |
| 3     | 6.672     | 15346457 | 4064527 | 96.990  | 95.368   |
| 4     | 7.323     | 113315   | 48326   | 0.716   | 1.134    |
| Total |           | 15822733 | 4261930 | 100.000 | 100.000  |



# HRMS of 7c

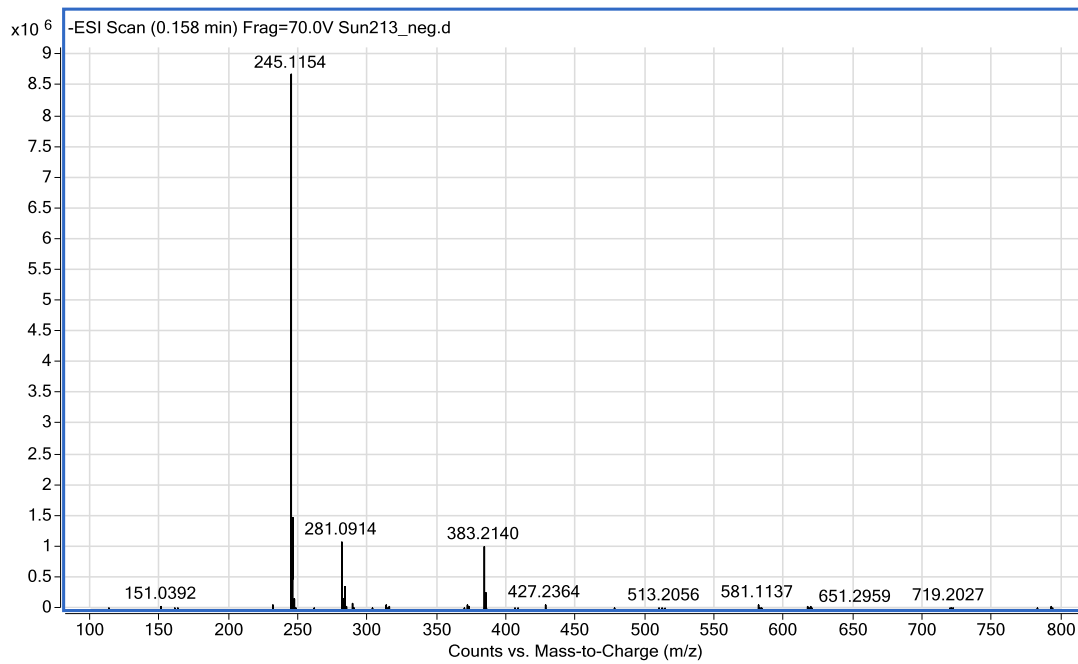

$^1\text{H}$  and  $^{13}\text{C}$  NMR spectra of **8a**

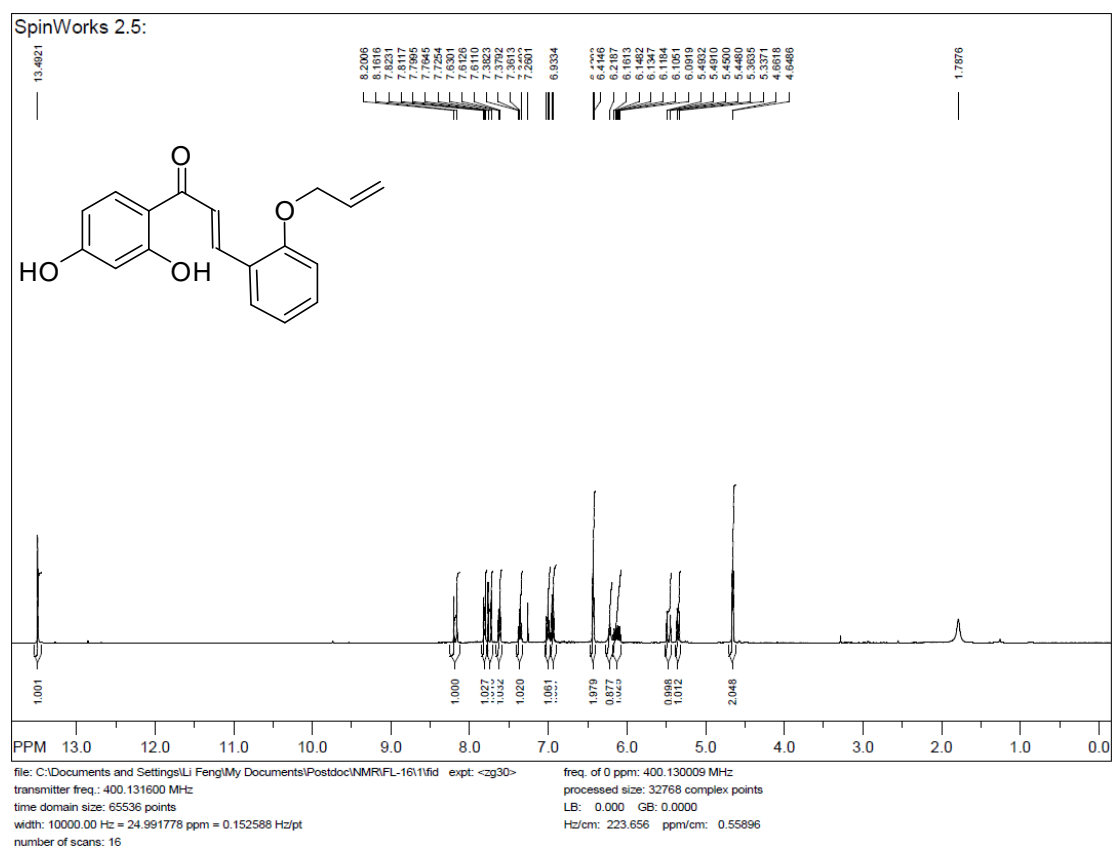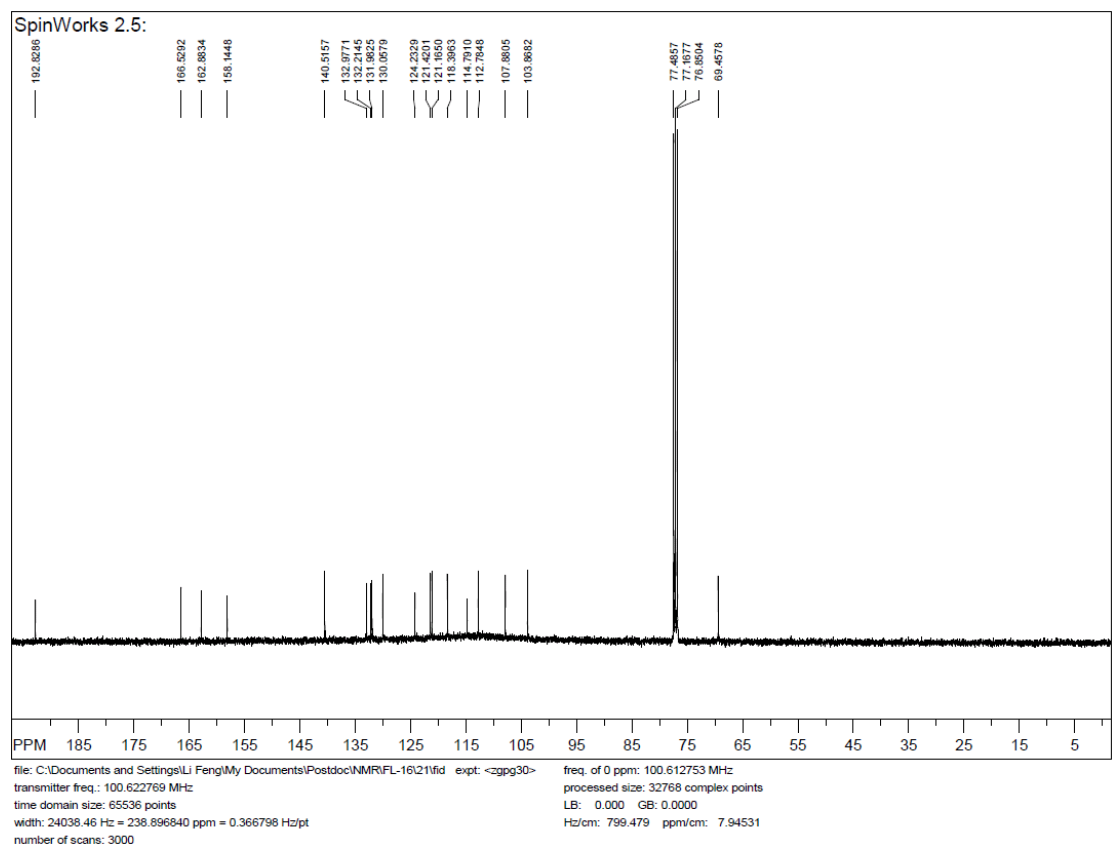

HPLC profile of **8a**

==== Shimadzu LCsolution Analysis Report ====

Sample Name : FL-16-P  
 Tray# : 1  
 Vail # : 91  
 Injection Volume : 10 uL  
 Data File Name : FL-16-P.lcd  
 Method File Name : SDQ gradient.lcm  
 Batch File Name :  
 Data Acquired : 7/27/2012 11:14:15 AM

C:\LabSolutions\LCsolution\Sun\Feng\FL-16-P.lcd

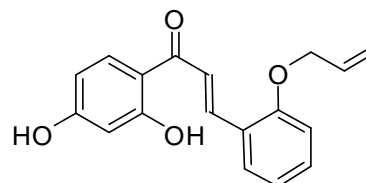

<Chromatogram>

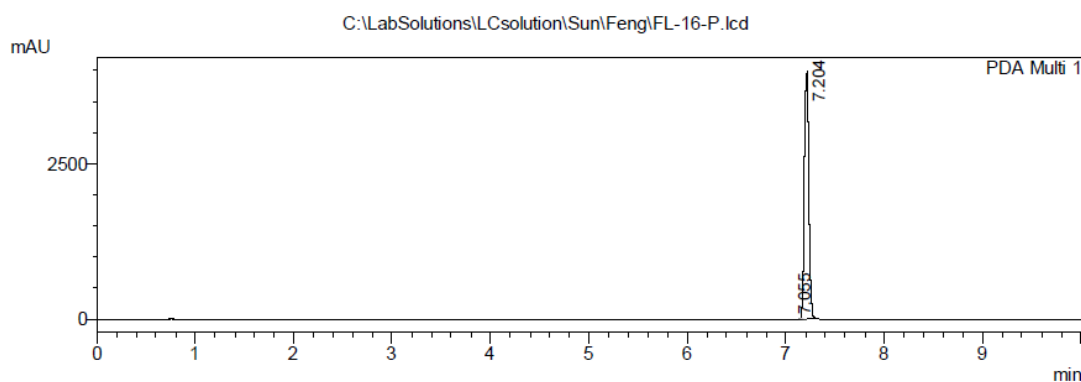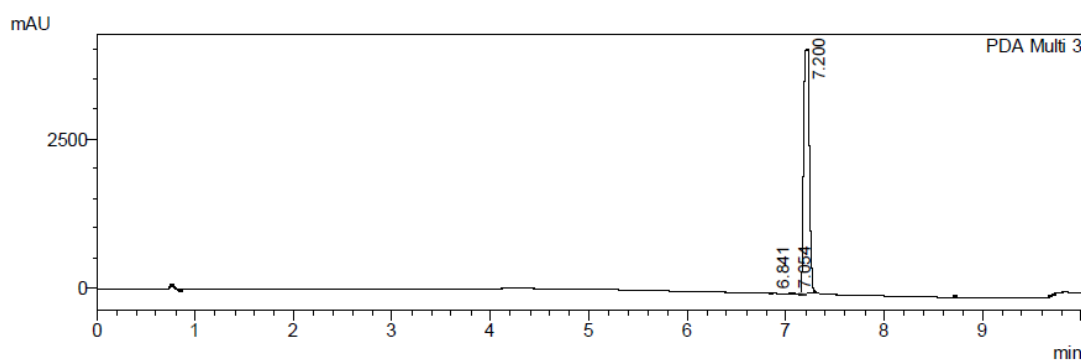

- 1 PDA Multi 1/254nm 4nm
- 2 PDA Multi 3/220nm 4nm

PeakTable

PDA Ch1 254nm 4nm

| Peak# | Ret. Time | Area     | Height  | Area %  | Height % |
|-------|-----------|----------|---------|---------|----------|
| 1     | 7.055     | 1525     | 1353    | 0.013   | 0.034    |
| 2     | 7.204     | 11375325 | 3961397 | 99.987  | 99.966   |
| Total |           | 11376849 | 3962750 | 100.000 | 100.000  |

PeakTable

PDA Ch3 220nm 4nm

| Peak# | Ret. Time | Area     | Height  | Area %  | Height % |
|-------|-----------|----------|---------|---------|----------|
| 1     | 6.841     | 6312     | 5295    | 0.042   | 0.129    |
| 2     | 7.054     | 10553    | 8050    | 0.069   | 0.196    |
| 3     | 7.200     | 15178952 | 4093726 | 99.889  | 99.675   |
| Total |           | 15195817 | 4107071 | 100.000 | 100.000  |

# HRMS of **8a**

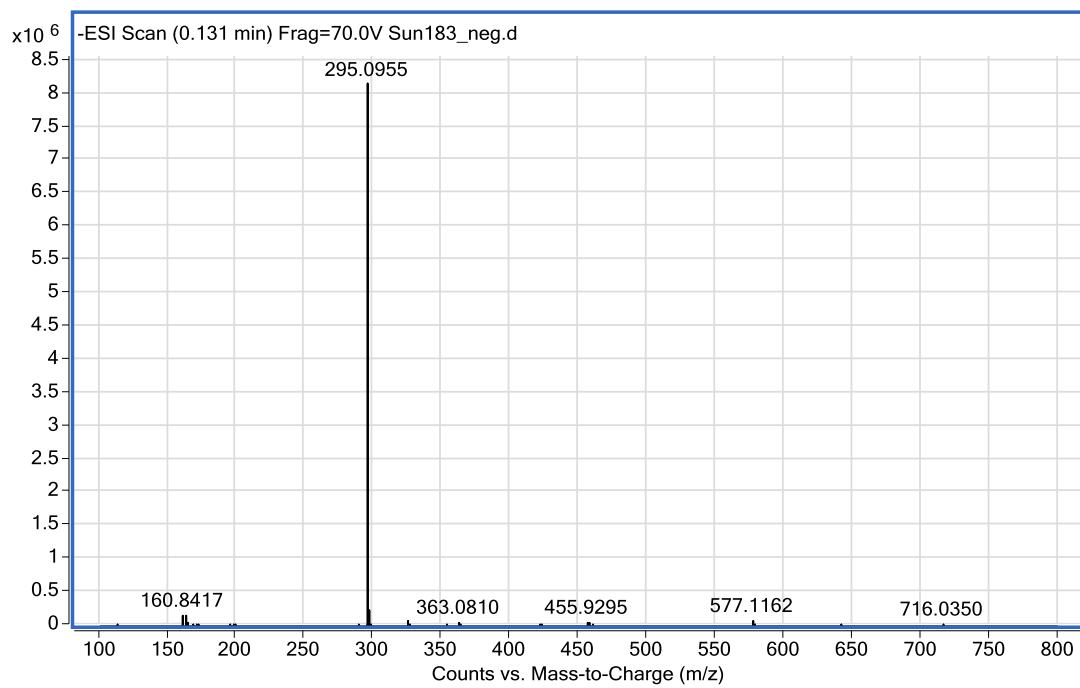

<sup>1</sup>H and <sup>13</sup>C NMR spectra of **8b**

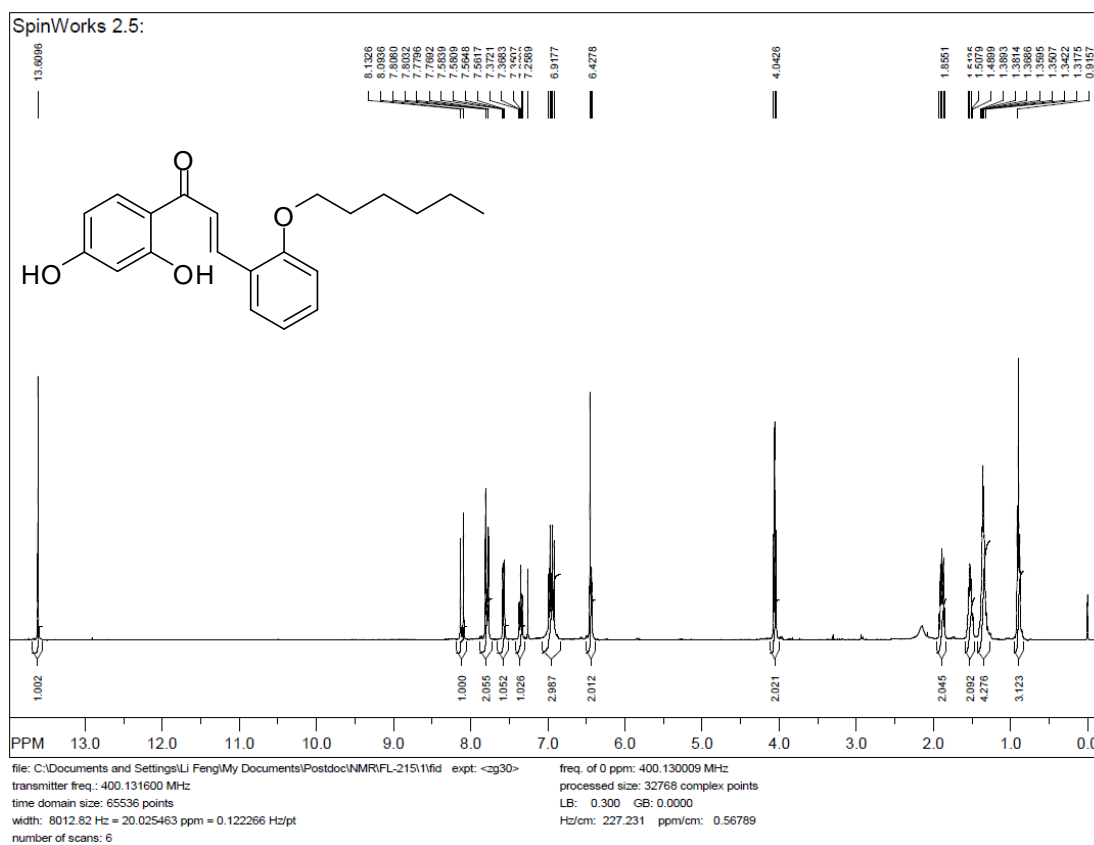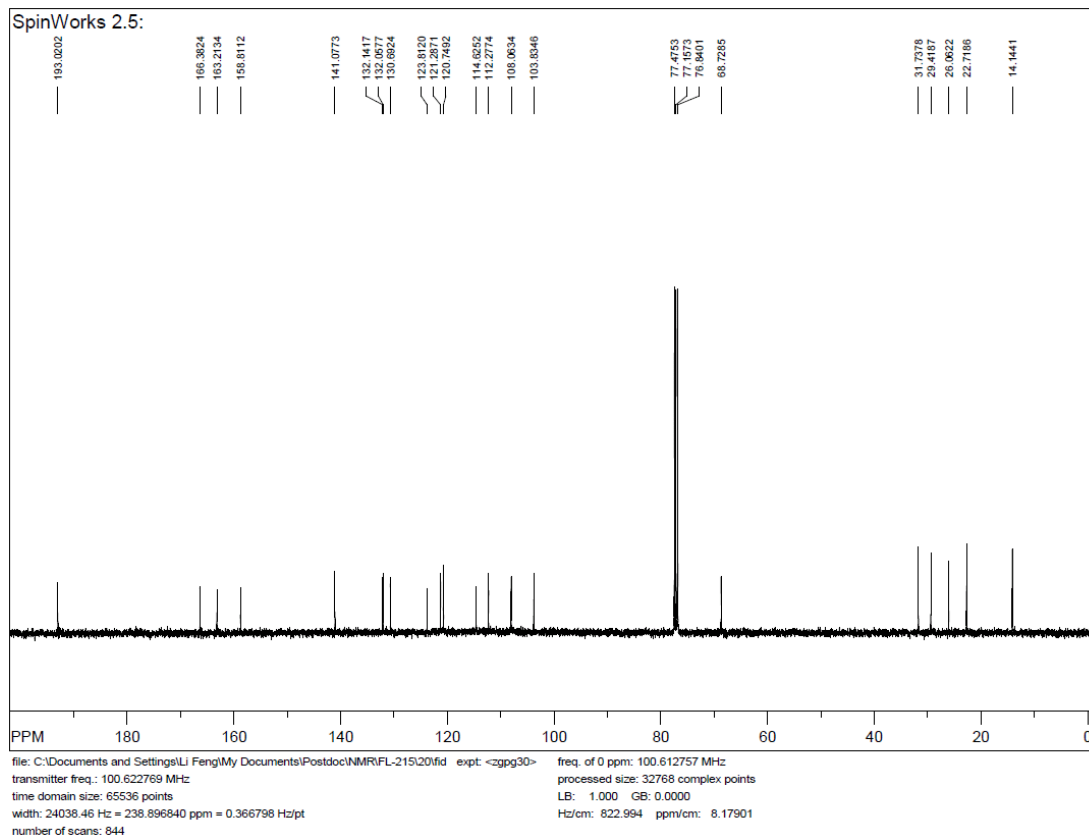

HPLC profile of 8b

==== Shimadzu LCsolution Analysis Report ====

Sample Name : FL-215-P  
 Tray# : 1  
 Vial # : 91  
 Injection Volume : 8 uL  
 Data File Name : FL-215-P.lcd  
 Method File Name : SDQ gradient.lcm  
 Batch File Name :  
 Data Acquired : 4/18/2012 3:10:19 PM

C:\LabSolutions\LCsolution\Sun\Feng\FL-215-P.lcd

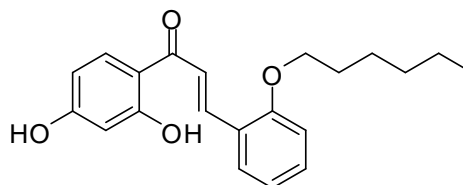

<Chromatogram>

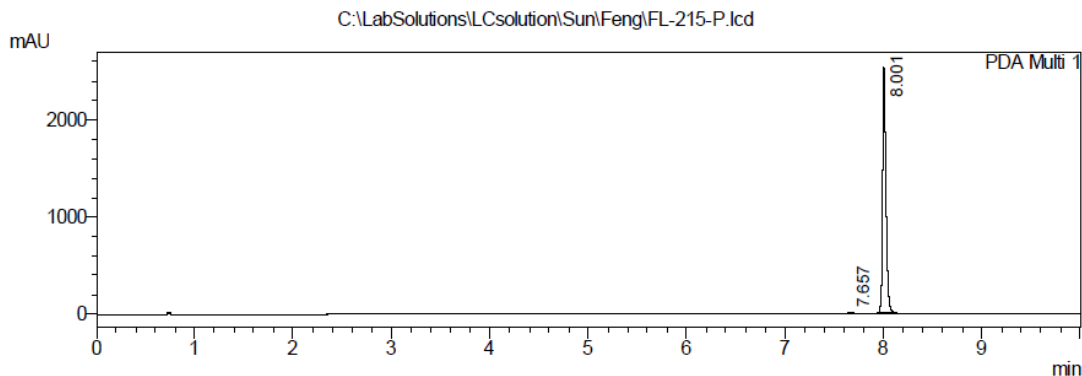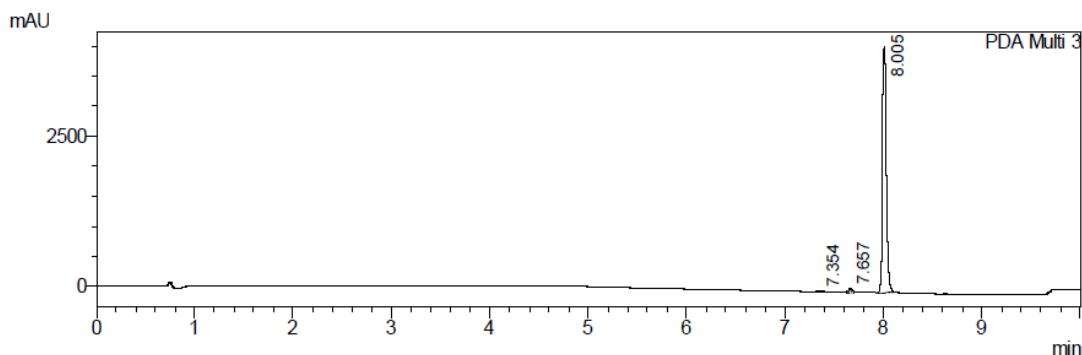

- 1 PDA Multi 1/254nm 4nm
- 2 PDA Multi 3/220nm 4nm

PeakTable

PDA Ch1 254nm 4nm

| Peak# | Ret. Time | Area    | Height  | Area %  | Height % |
|-------|-----------|---------|---------|---------|----------|
| 1     | 7.657     | 23687   | 12103   | 0.387   | 0.499    |
| 2     | 8.001     | 6101539 | 2415172 | 99.613  | 99.501   |
| Total |           | 6125226 | 2427275 | 100.000 | 100.000  |

PeakTable

PDA Ch3 220nm 4nm

| Peak# | Ret. Time | Area     | Height  | Area %  | Height % |
|-------|-----------|----------|---------|---------|----------|
| 1     | 7.354     | 25073    | 10662   | 0.212   | 0.256    |
| 2     | 7.657     | 109800   | 50556   | 0.930   | 1.216    |
| 3     | 8.005     | 11673867 | 4096151 | 98.858  | 98.527   |
| Total |           | 11808740 | 4157369 | 100.000 | 100.000  |

# HRMS of **8b**

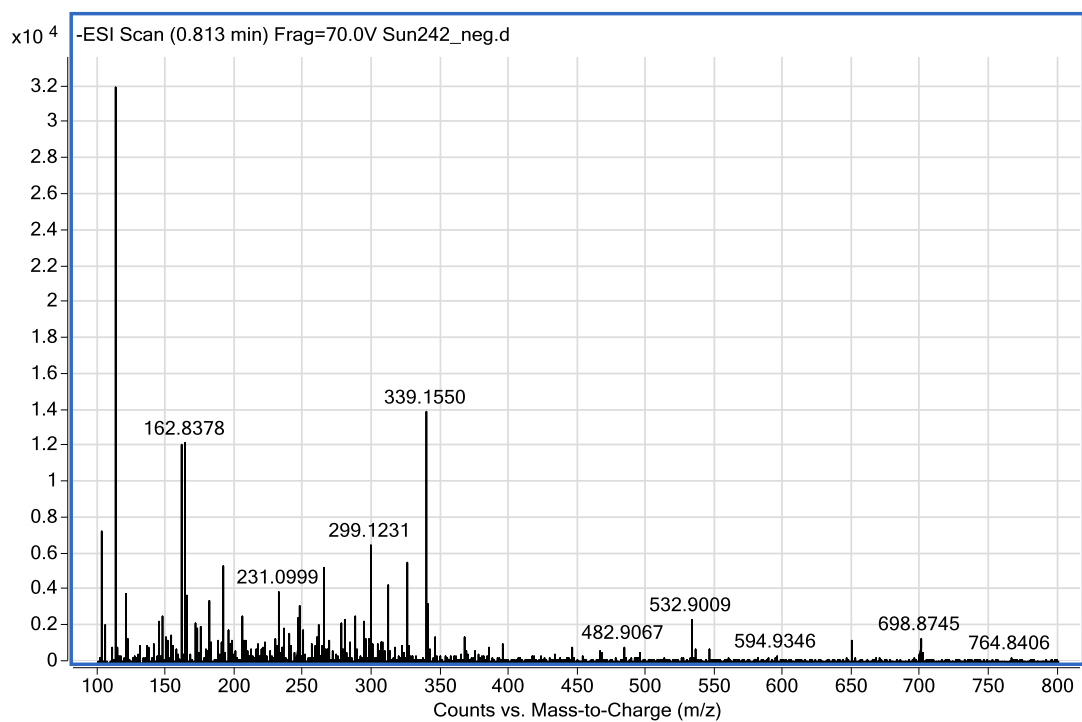

$^1\text{H}$  and  $^{13}\text{C}$  NMR spectra of **8c**

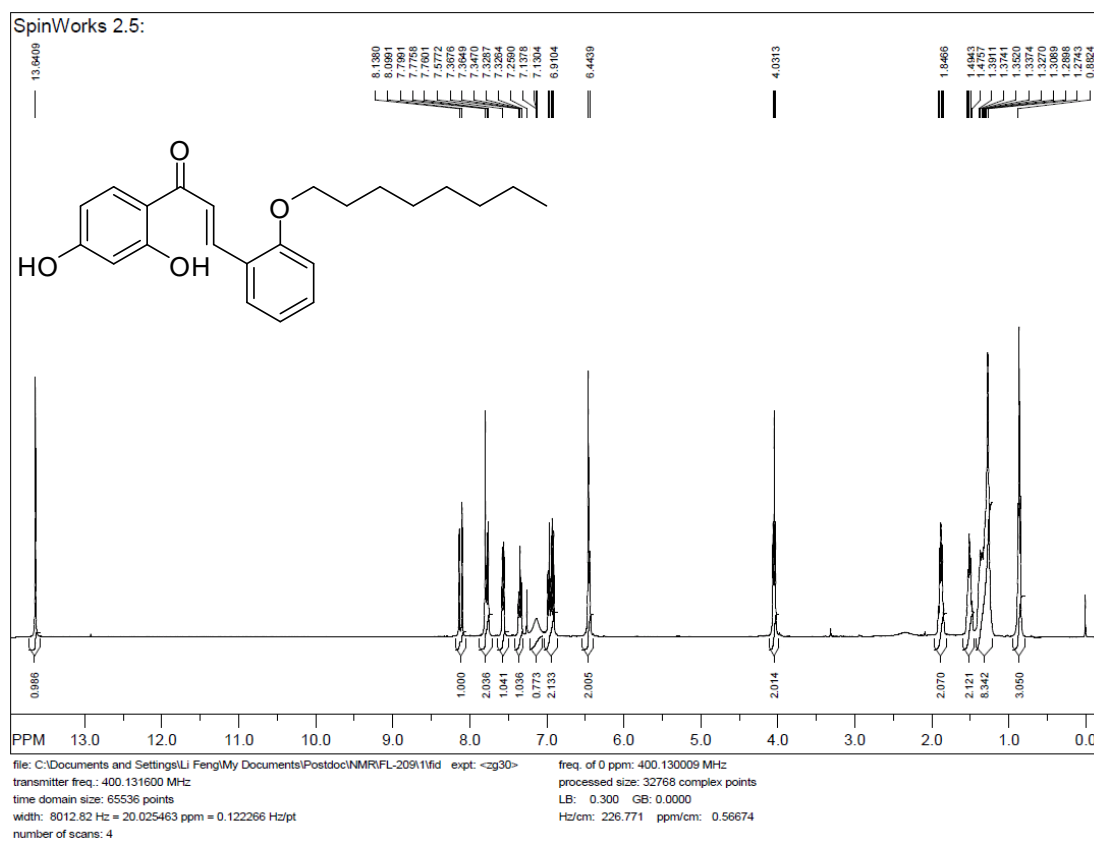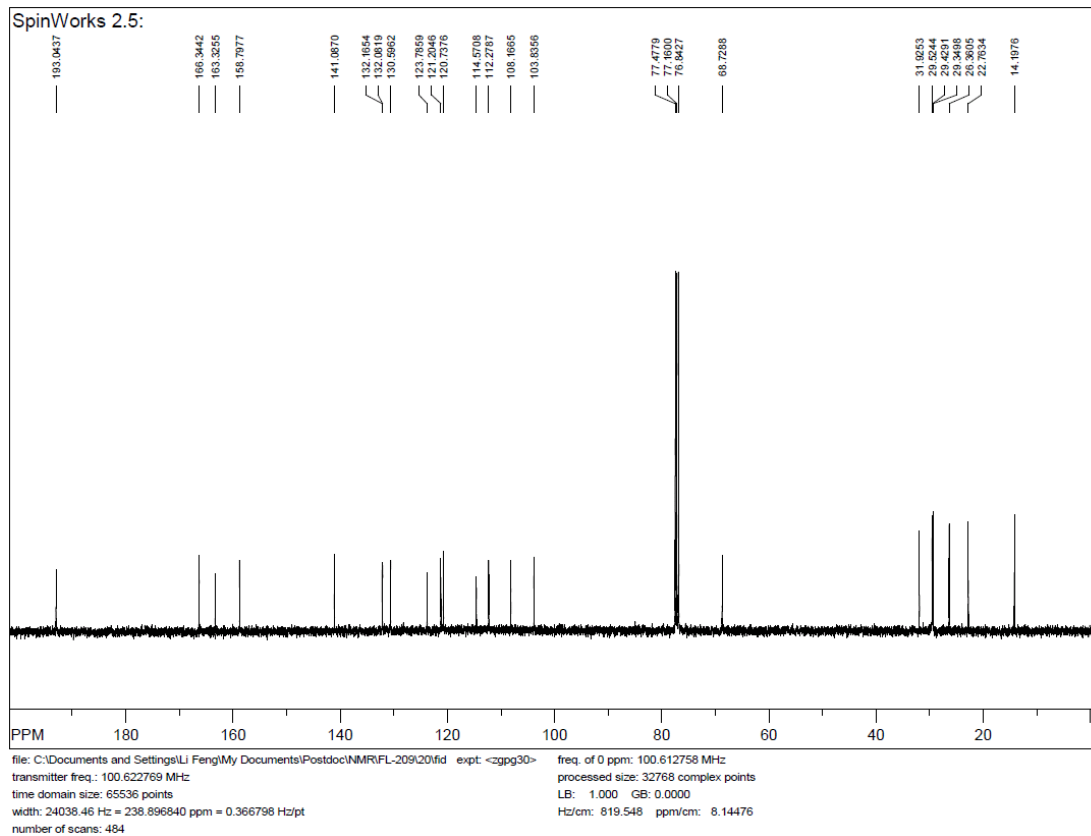



HPLC profile of 8c

==== Shimadzu LCsolution Analysis Report ====

Sample Name : FL-209-P  
 Tray# : 1  
 Vial # : 91  
 Injection Volume : 10 uL  
 Data File Name : FL-209-P.lcd  
 Method File Name : SDQ.gradient.lcm  
 Batch File Name :  
 Data Acquired : 4/12/2012 12:23:11 PM

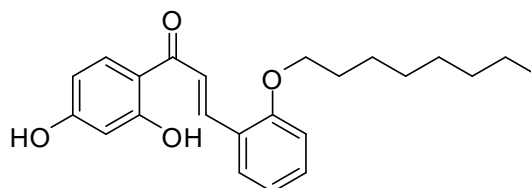

<Chromatogram>

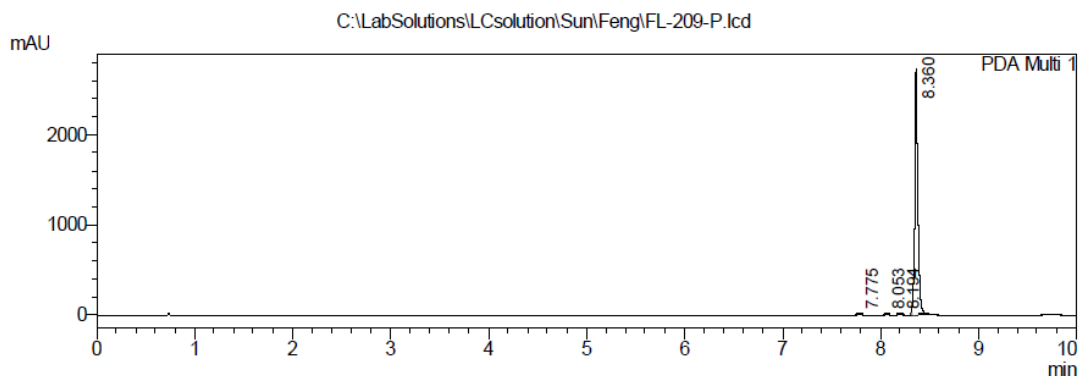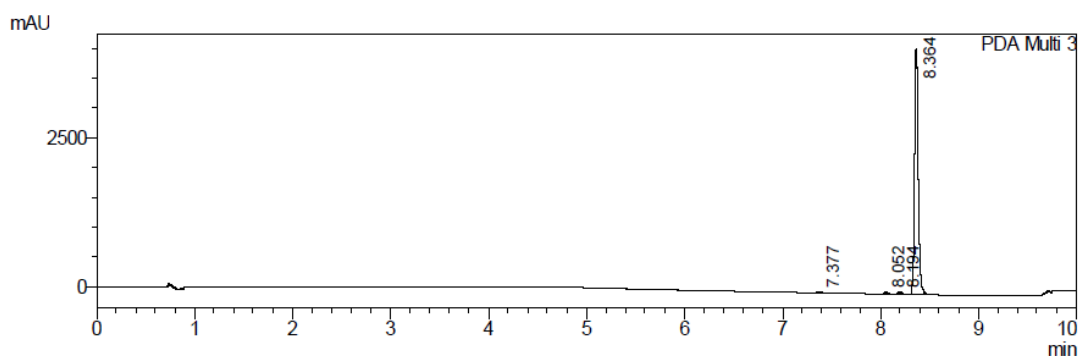

- 1 PDA Multi 1/254nm 4nm
- 2 PDA Multi 3/220nm 4nm

PeakTable

PDA Ch1 254nm 4nm

| Peak# | Ret. Time | Area    | Height  | Area %  | Height % |
|-------|-----------|---------|---------|---------|----------|
| 1     | 7.775     | 12512   | 6297    | 0.192   | 0.242    |
| 2     | 8.053     | 6266    | 4474    | 0.096   | 0.172    |
| 3     | 8.194     | 11235   | 6670    | 0.172   | 0.256    |
| 4     | 8.360     | 6490778 | 2587108 | 99.540  | 99.330   |
| Total |           | 6520790 | 2604549 | 100.000 | 100.000  |

PeakTable

PDA Ch3 220nm 4nm

| Peak# | Ret. Time | Area     | Height  | Area %  | Height % |
|-------|-----------|----------|---------|---------|----------|
| 1     | 7.377     | 7083     | 4676    | 0.059   | 0.113    |
| 2     | 8.052     | 23508    | 16003   | 0.196   | 0.386    |
| 3     | 8.194     | 43361    | 25503   | 0.361   | 0.614    |
| 4     | 8.364     | 11943340 | 4104825 | 99.385  | 98.887   |
| Total |           | 12017292 | 4151008 | 100.000 | 100.000  |

# HRMS of 8c

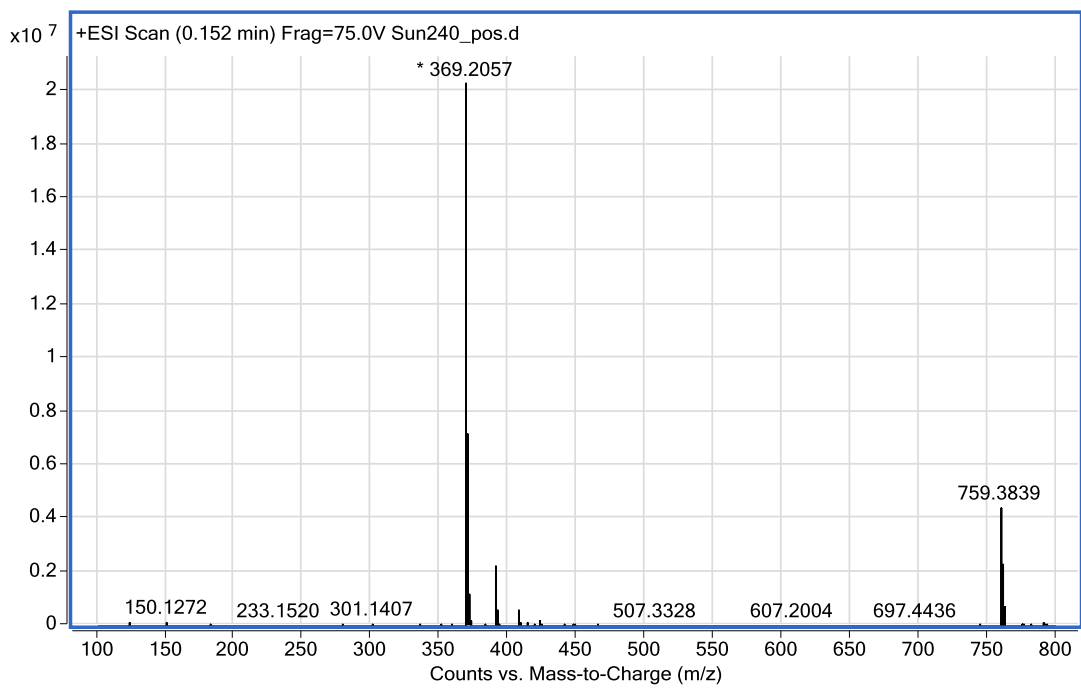

$^1\text{H}$  and  $^{13}\text{C}$  NMR spectra of **8d**

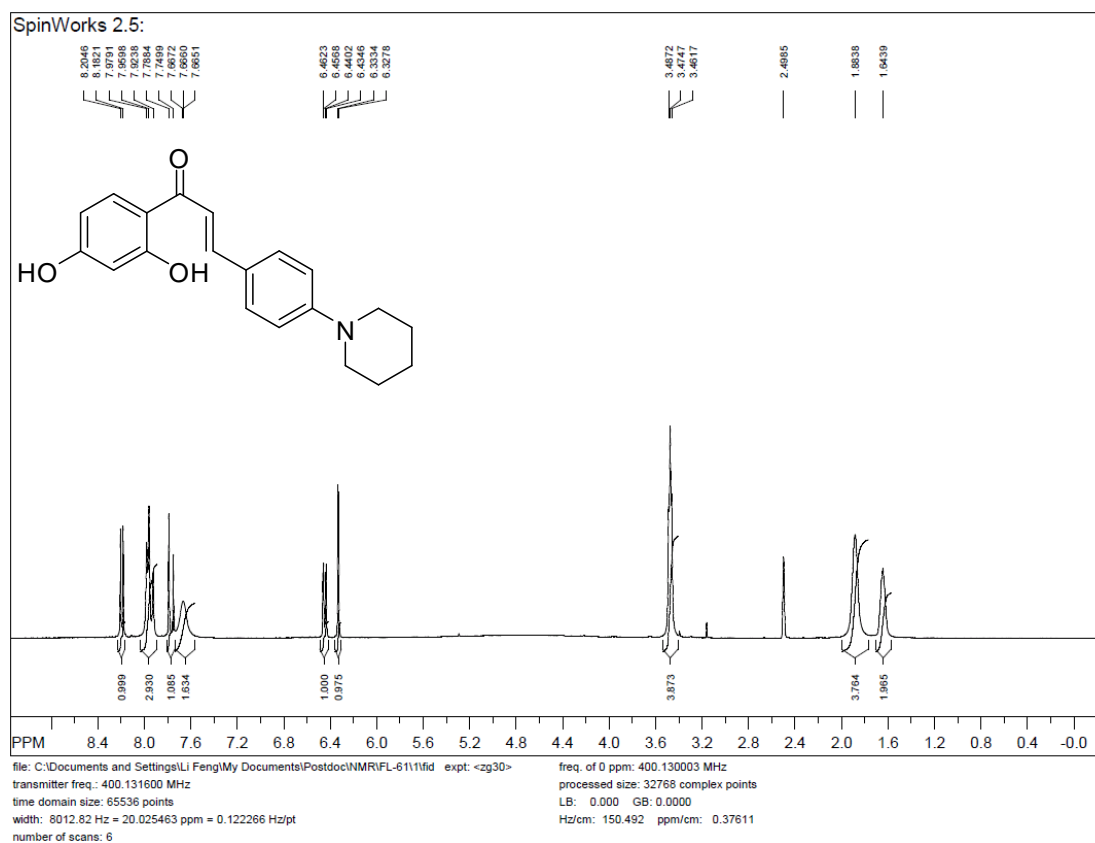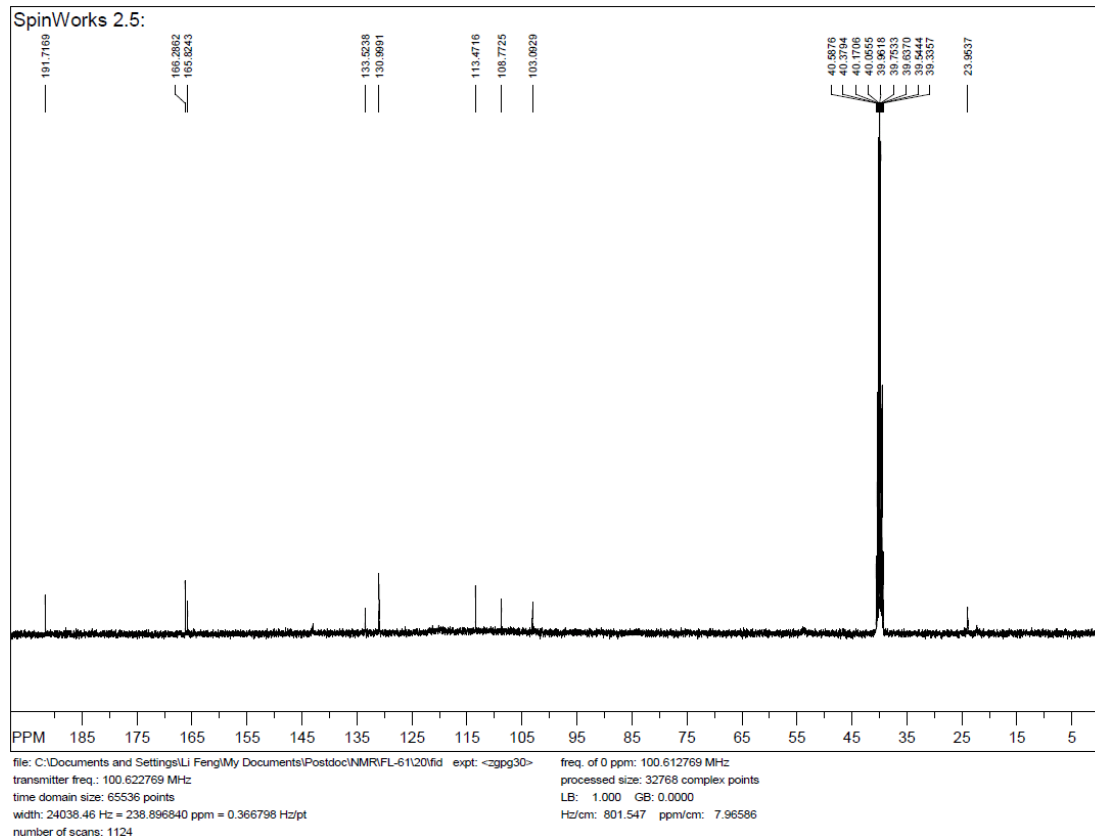

HPLC profile of 8d

==== Shimadzu LCsolution Analysis Report ====

Sample Name : FL-61-P  
 Tray# : 1  
 Vial # : 91  
 Injection Volume : 12 uL  
 Data File Name : FL-61-P.lcd  
 Method File Name : SDQ gradient.lcm  
 Batch File Name :  
 Data Acquired : 12/28/2011 3:01:36 PM

C:\LabSolutions\LCsolution\Sun\Feng\FL-61-P.lcd

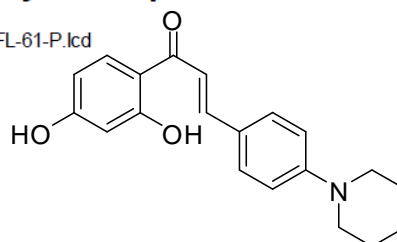

<Chromatogram>

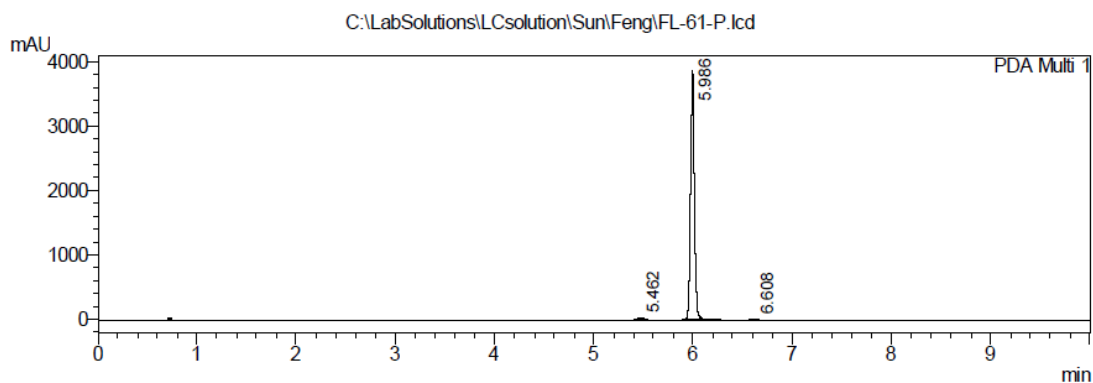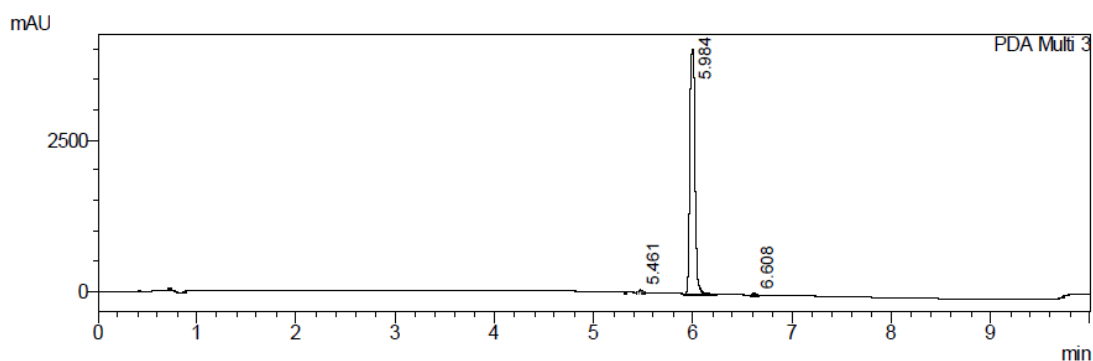

- 1 PDA Multi 1/254nm 4nm
- 2 PDA Multi 3/220nm 4nm

PeakTable

PDA Ch1 254nm 4nm

| Peak# | Ret. Time | Area    | Height  | Area %  | Height % |
|-------|-----------|---------|---------|---------|----------|
| 1     | 5.462     | 60587   | 24274   | 0.638   | 0.626    |
| 2     | 5.986     | 9395389 | 3837779 | 98.970  | 98.957   |
| 3     | 6.608     | 37199   | 16161   | 0.392   | 0.417    |
| Total |           | 9493174 | 3878214 | 100.000 | 100.000  |

PeakTable

PDA Ch3 220nm 4nm

| Peak# | Ret. Time | Area     | Height  | Area %  | Height % |
|-------|-----------|----------|---------|---------|----------|
| 1     | 5.461     | 93383    | 41668   | 0.688   | 1.016    |
| 2     | 5.984     | 13417081 | 4029253 | 98.813  | 98.234   |
| 3     | 6.608     | 67839    | 30754   | 0.500   | 0.750    |
| Total |           | 13578303 | 4101675 | 100.000 | 100.000  |

# HRMS of 8d

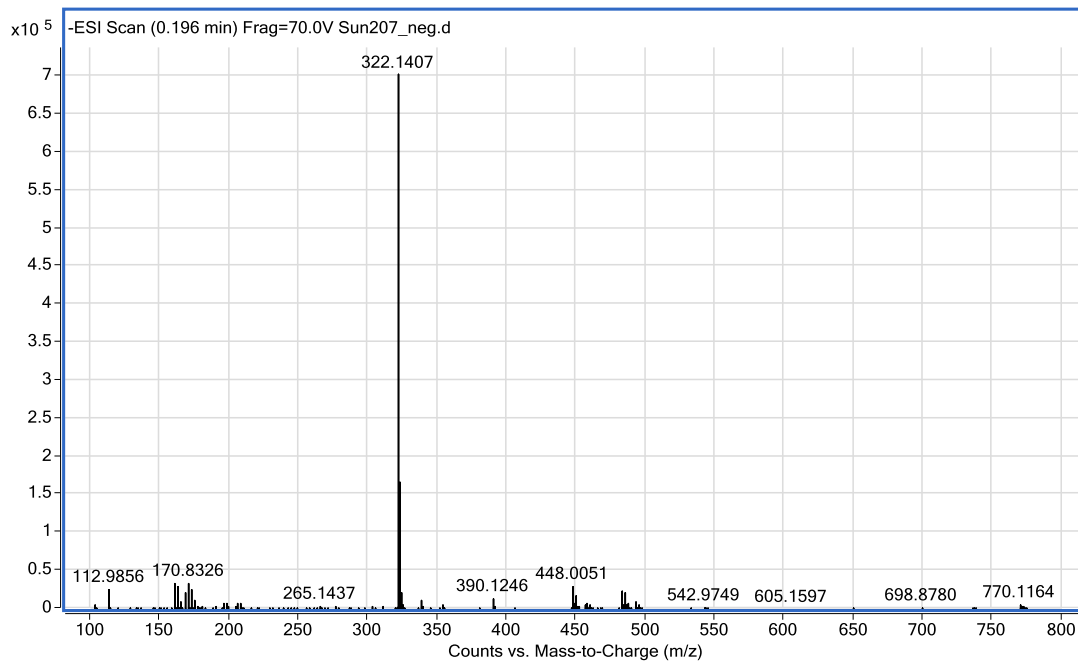

$^1\text{H}$  and  $^{13}\text{C}$  NMR spectra of **8e**

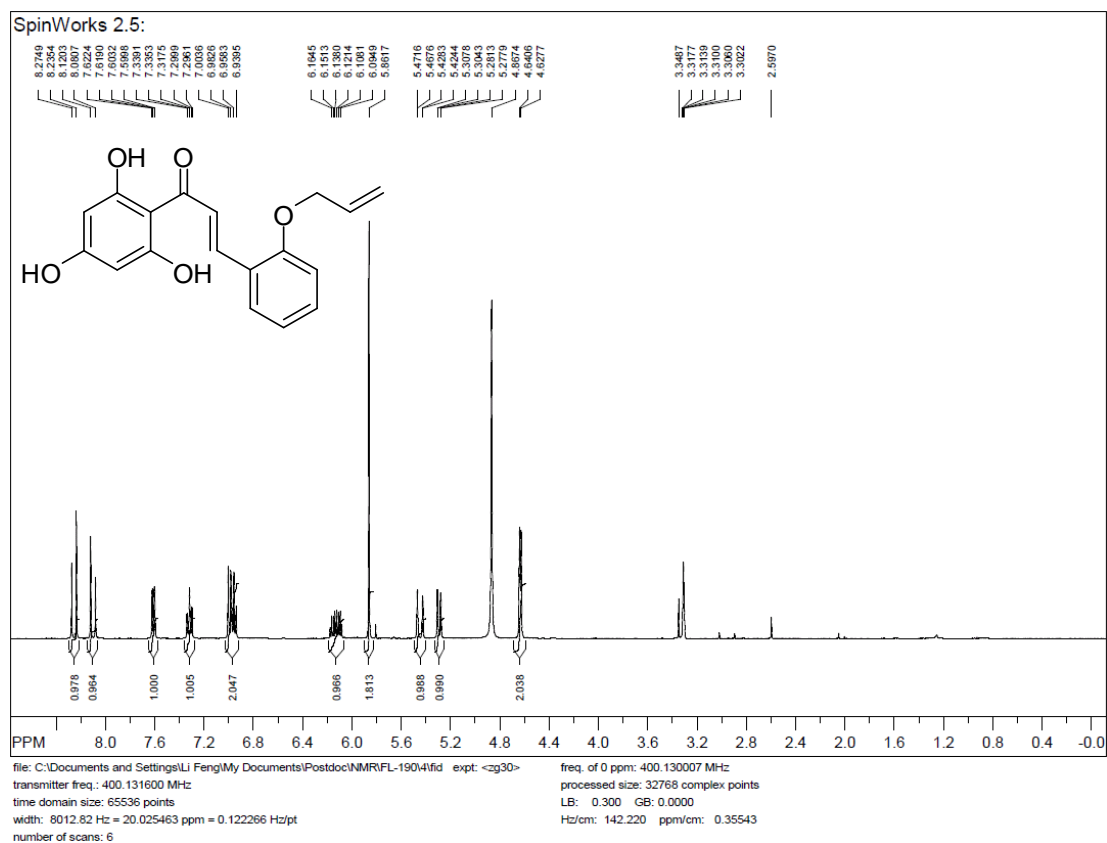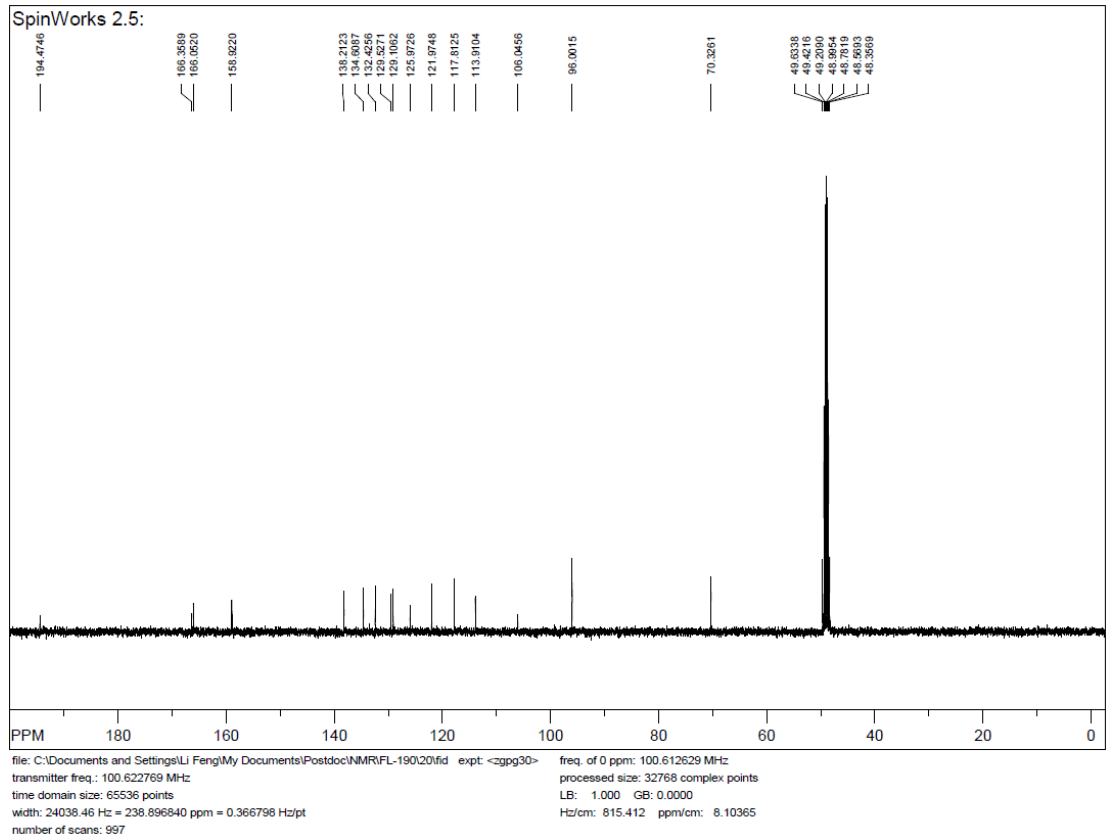

HPLC profile of **8e**

==== Shimadzu LCsolution Analysis Report ====

Sample Name : FL-190-P  
 Tray# : 1  
 Vail # : 91  
 Injection Volume : 2 uL  
 Data File Name : FL-190-P.lcd  
 Method File Name : SDQ gradient.lcm  
 Batch File Name :  
 Data Acquired : 3/19/2012 3:34:00 PM

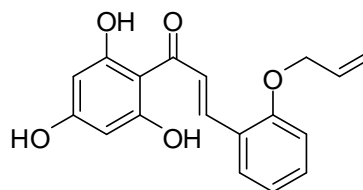

<Chromatogram>

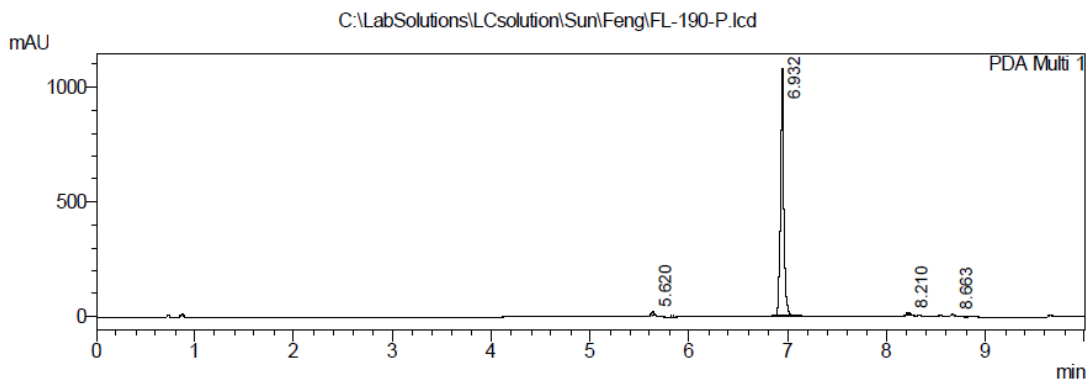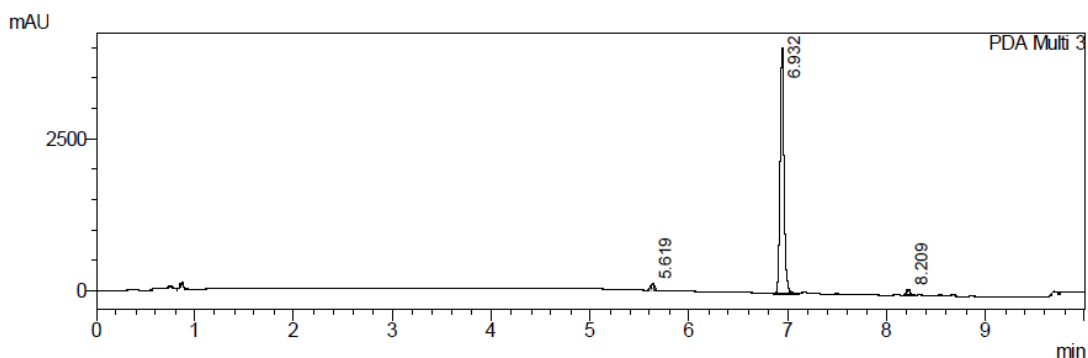

- 1 PDA Multi 1/254nm 4nm
- 2 PDA Multi 3/220nm 4nm

PeakTable

PDA Ch1 254nm 4nm

| Peak# | Ret. Time | Area    | Height  | Area %  | Height % |
|-------|-----------|---------|---------|---------|----------|
| 1     | 5.620     | 31164   | 15706   | 1.031   | 1.409    |
| 2     | 6.932     | 2948049 | 1079579 | 97.496  | 96.826   |
| 3     | 8.210     | 31180   | 12760   | 1.031   | 1.144    |
| 4     | 8.663     | 13375   | 6923    | 0.442   | 0.621    |
| Total |           | 3023769 | 1114968 | 100.000 | 100.000  |

PeakTable

PDA Ch3 220nm 4nm

| Peak# | Ret. Time | Area     | Height  | Area %  | Height % |
|-------|-----------|----------|---------|---------|----------|
| 1     | 5.619     | 181512   | 85313   | 1.335   | 2.029    |
| 2     | 6.932     | 13214180 | 4034852 | 97.216  | 95.977   |
| 3     | 8.209     | 196851   | 83802   | 1.448   | 1.993    |
| Total |           | 13592543 | 4203966 | 100.000 | 100.000  |

HRMS of **8e**

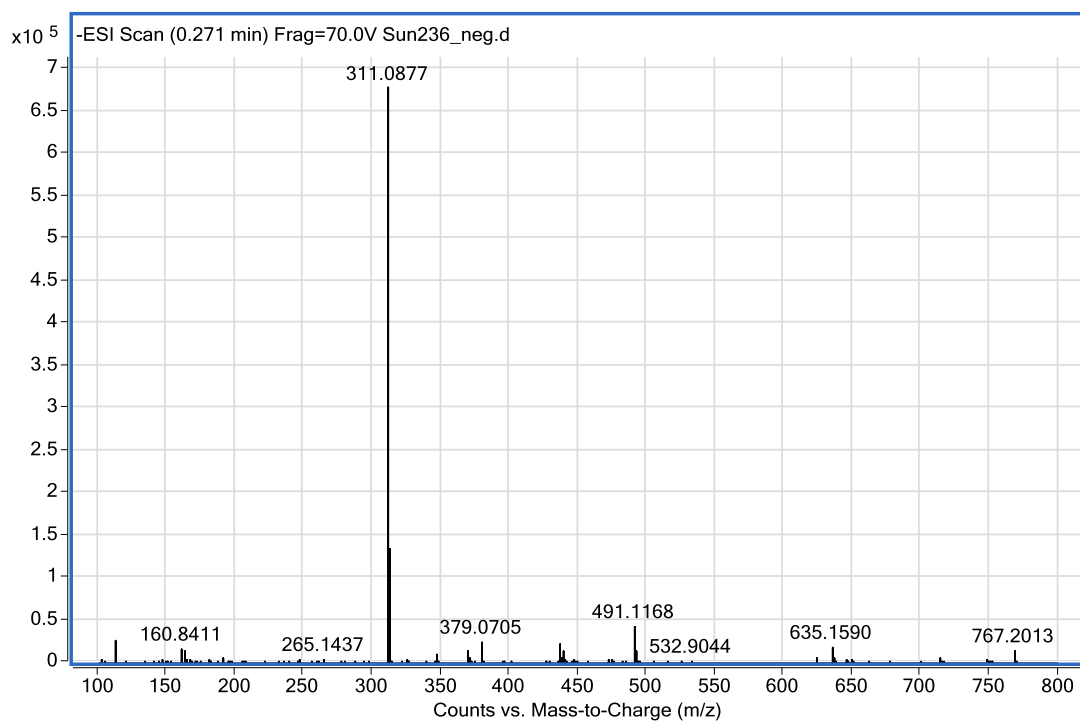



$^1\text{H}$  and  $^{13}\text{C}$  NMR spectra of **8f**

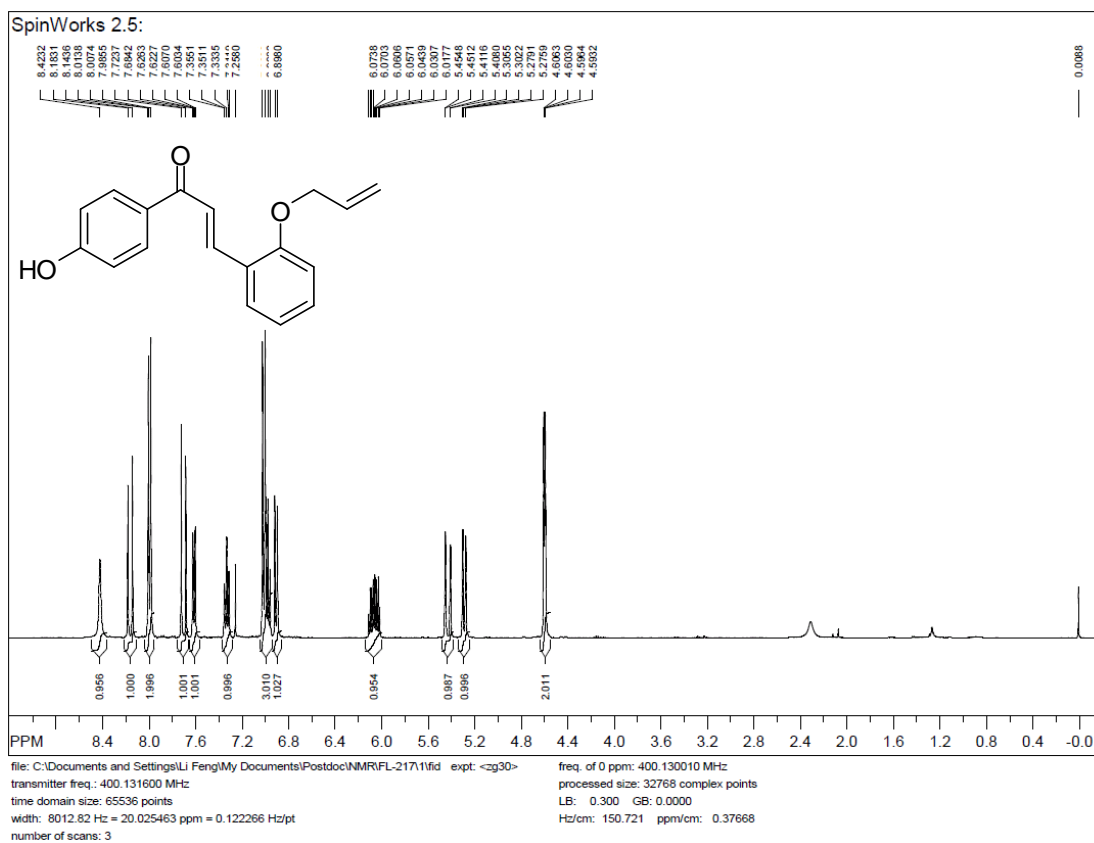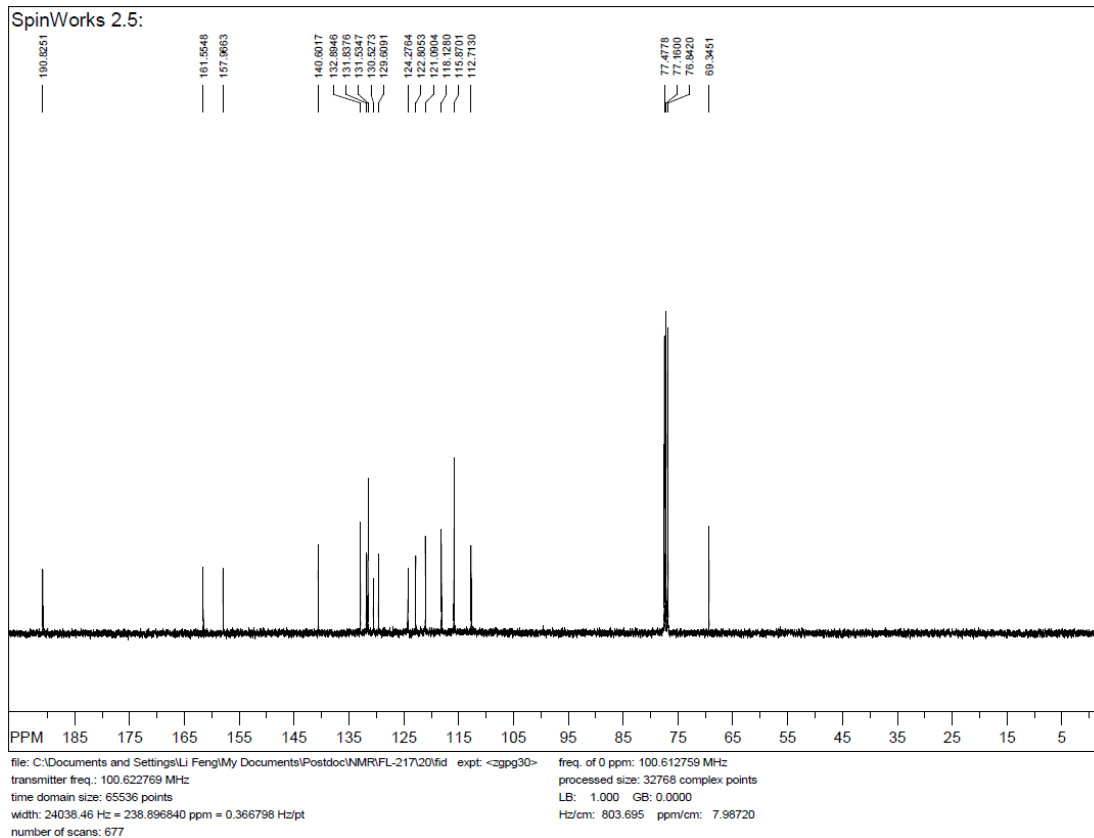

HPLC profile of **8f**

## ==== Shimadzu LCsolution Analysis Report ====

Sample Name : FL-217-P  
 Tray# : 1  
 Vial # : 91  
 Injection Volume : 10 uL  
 Data File Name : FL-217-P.lcd  
 Method File Name : SDQ gradient.lcm  
 Batch File Name :  
 Data Acquired : 4/23/2012 11:54:07 AM

C:\LabSolutions\LCsolution\Sun\Feng\FL-217-P.lcd

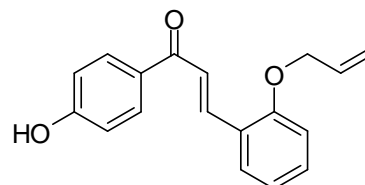

### <Chromatogram>

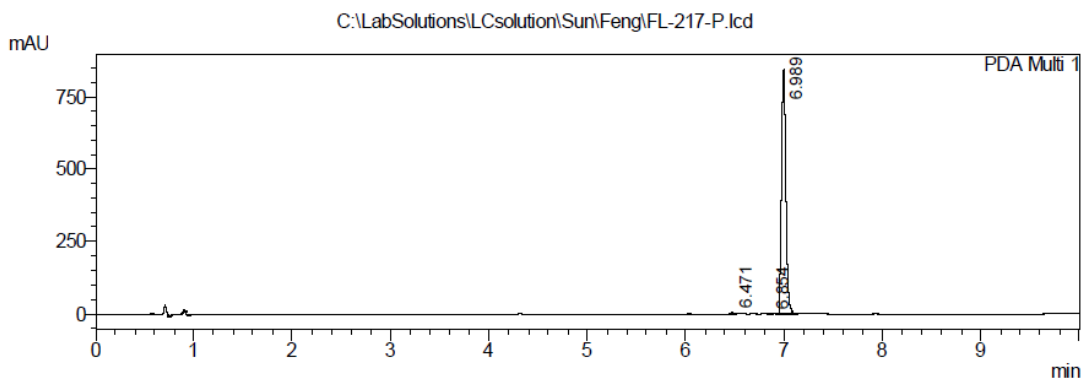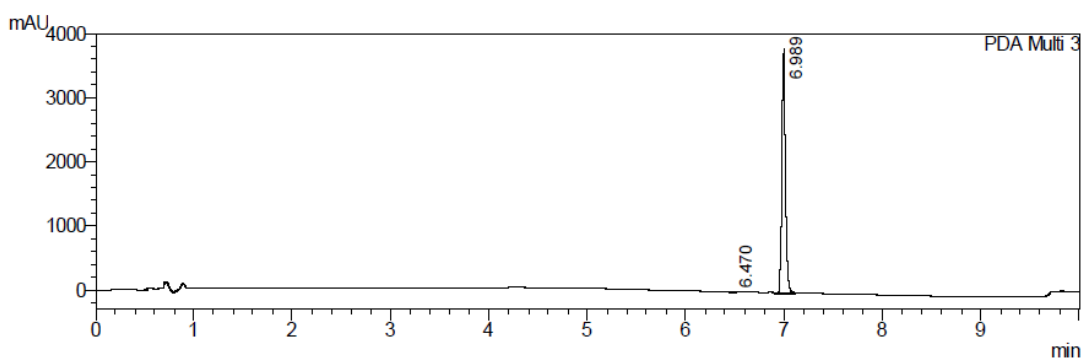

- 1 PDA Multi 1/254nm 4nm
- 2 PDA Multi 3/220nm 4nm

PeakTable

PDA Ch1 254nm 4nm

| Peak# | Ret. Time | Area    | Height | Area %  | Height % |
|-------|-----------|---------|--------|---------|----------|
| 1     | 6.471     | 5761    | 2977   | 0.247   | 0.353    |
| 2     | 6.854     | 3541    | 1929   | 0.152   | 0.229    |
| 3     | 6.989     | 2318329 | 838671 | 99.600  | 99.418   |
| Total |           | 2327630 | 843577 | 100.000 | 100.000  |

PeakTable

PDA Ch3 220nm 4nm

| Peak# | Ret. Time | Area    | Height  | Area %  | Height % |
|-------|-----------|---------|---------|---------|----------|
| 1     | 6.470     | 16347   | 7261    | 0.197   | 0.190    |
| 2     | 6.989     | 8271827 | 3805815 | 99.803  | 99.810   |
| Total |           | 8288174 | 3813077 | 100.000 | 100.000  |

HRMS of **8f**

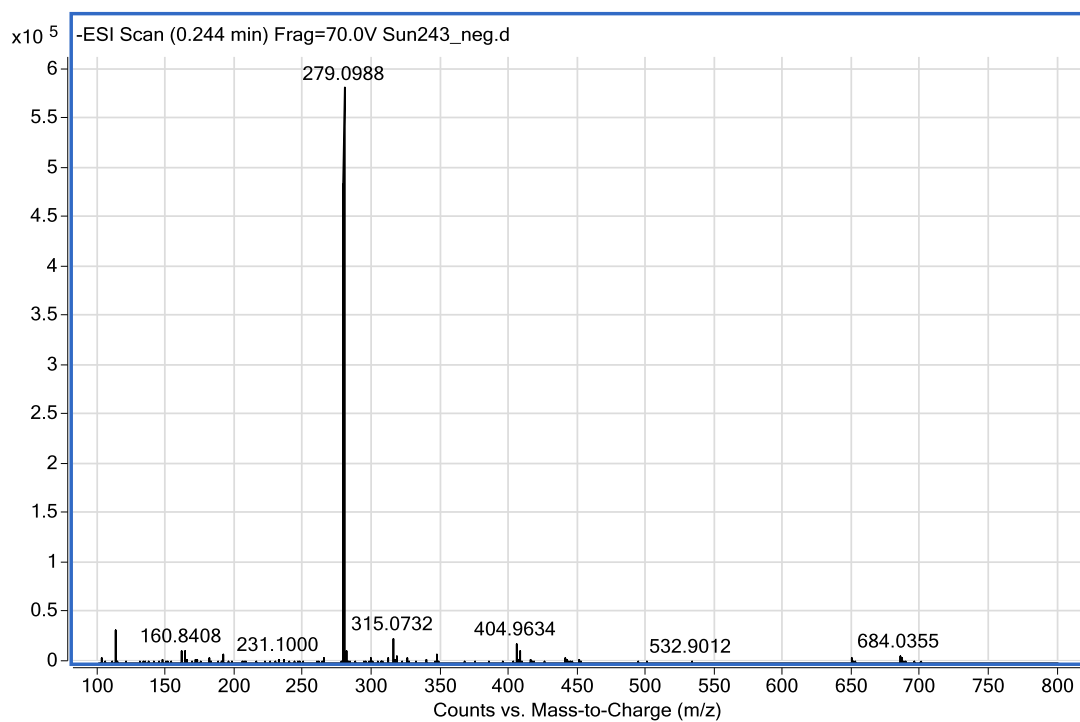

<sup>1</sup>H and <sup>13</sup>C NMR spectra of **8g**

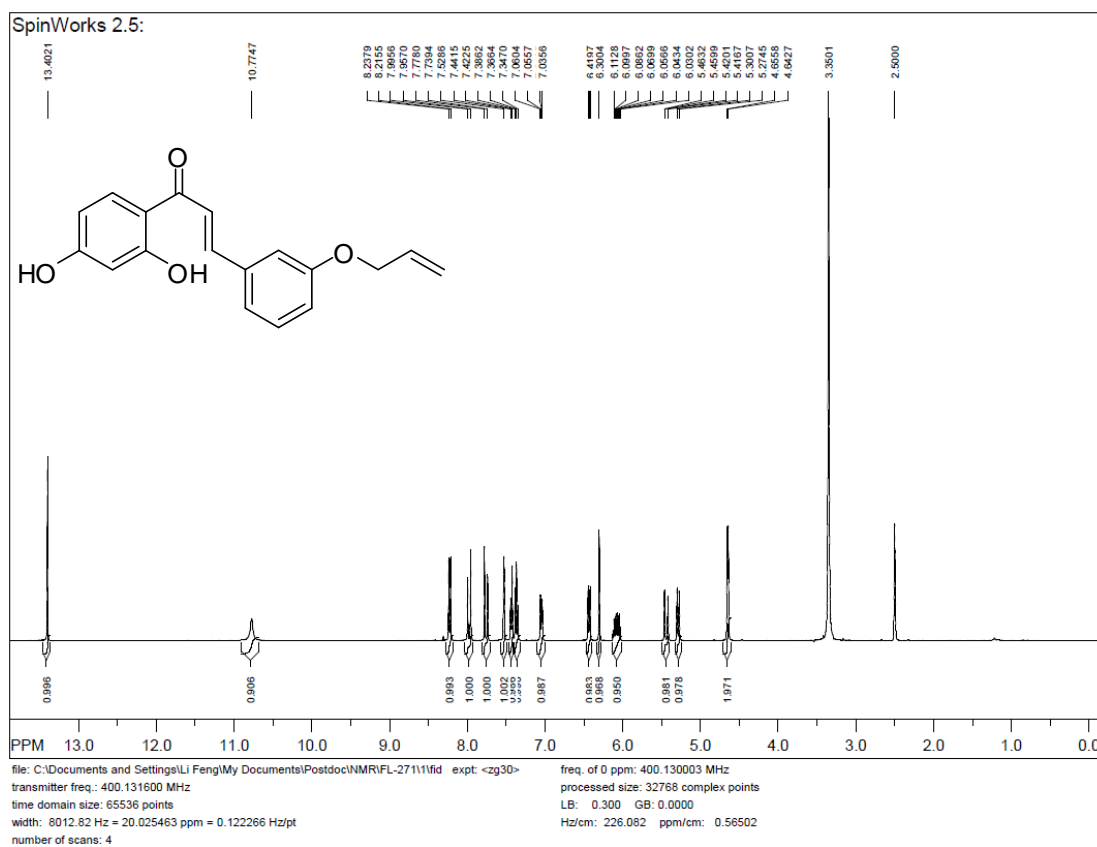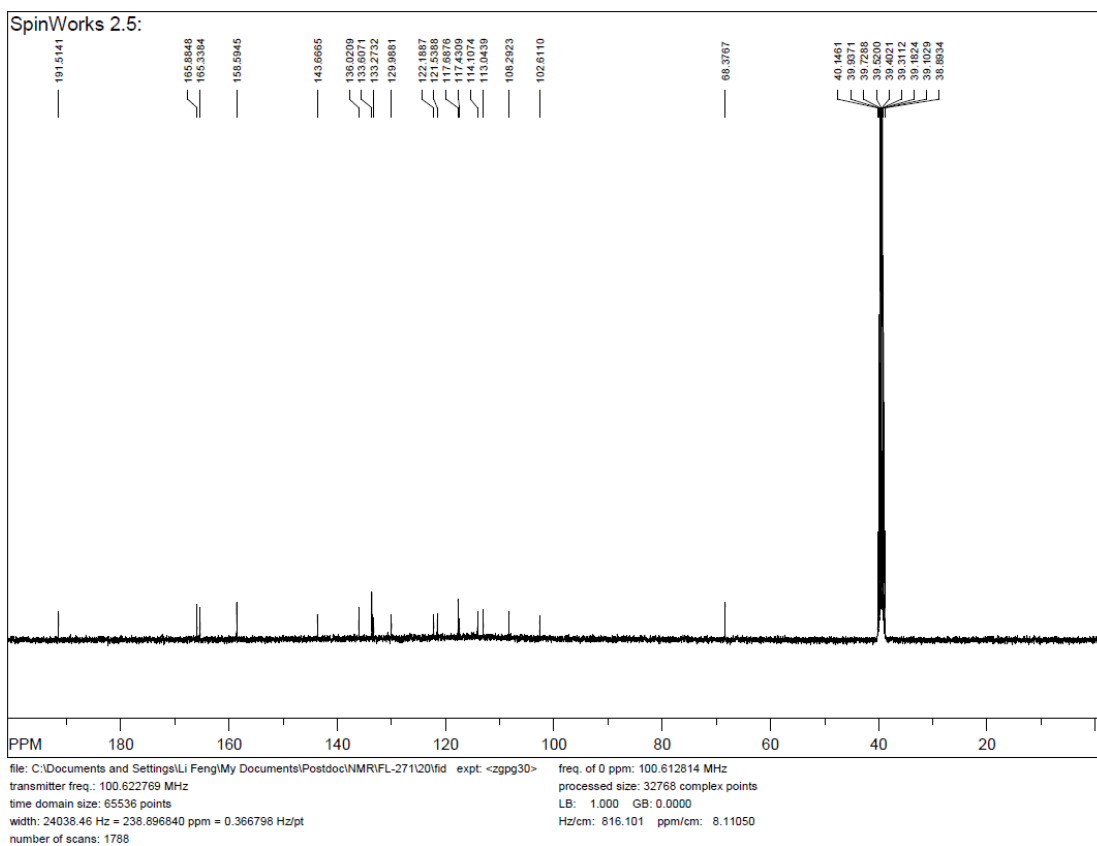

HPLC profile of 8g

==== Shimadzu LCsolution Analysis Report ====

Sample Name : FL-271-P  
 Tray# : 1  
 Vial # : 91  
 Injection Volume : 12 uL  
 Data File Name : FL-271-P.lcd  
 Method File Name : SDQ gradient.lcm  
 Batch File Name :  
 Data Acquired : 6/28/2012 4:36:48 PM

C:\LabSolutions\LCsolution\Sun\Feng\FL-271-P.lcd

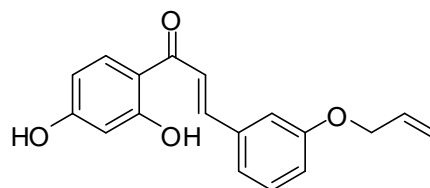

<Chromatogram>

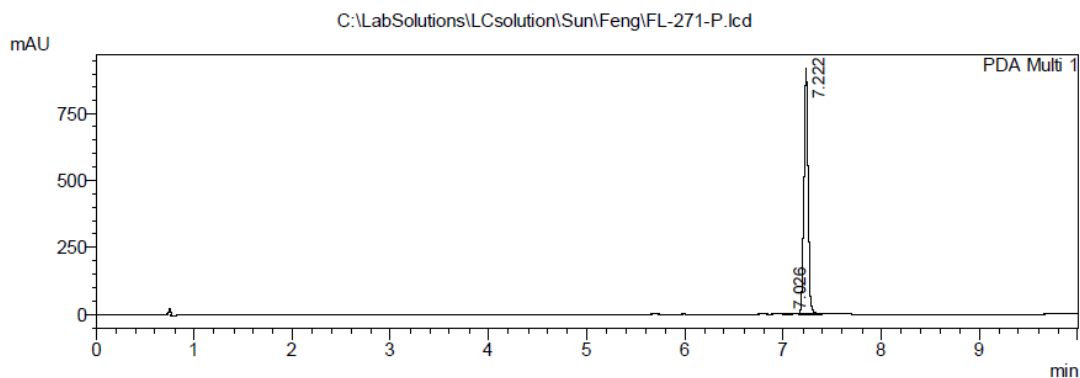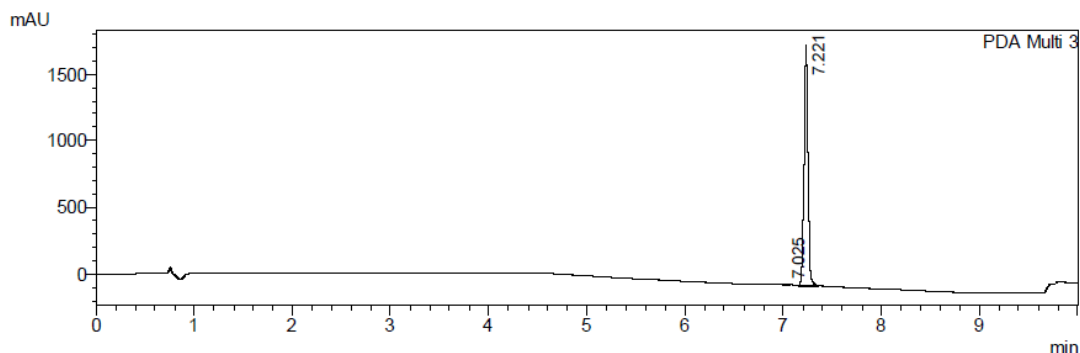

- 1 PDA Multi 1/254nm 4nm
- 2 PDA Multi 3/220nm 4nm

PeakTable

PDA Ch1 254nm 4nm

| Peak# | Ret. Time | Area    | Height | Area %  | Height % |
|-------|-----------|---------|--------|---------|----------|
| 1     | 7.026     | 7865    | 3240   | 0.309   | 0.357    |
| 2     | 7.222     | 2535579 | 904548 | 99.691  | 99.643   |
| Total |           | 2543444 | 907788 | 100.000 | 100.000  |

PeakTable

PDA Ch3 220nm 4nm

| Peak# | Ret. Time | Area    | Height  | Area %  | Height % |
|-------|-----------|---------|---------|---------|----------|
| 1     | 7.025     | 18998   | 9982    | 0.404   | 0.551    |
| 2     | 7.221     | 4684871 | 1800059 | 99.596  | 99.449   |
| Total |           | 4703869 | 1810040 | 100.000 | 100.000  |

# HRMS of 8g

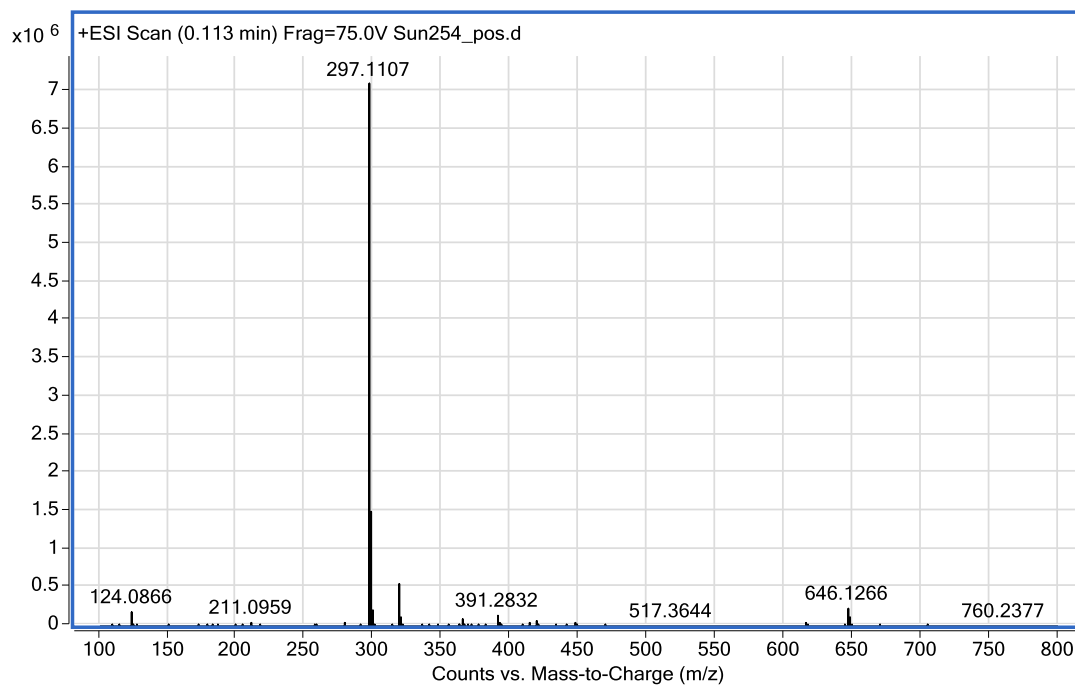

$^1\text{H}$  and  $^{13}\text{C}$  NMR spectra of **8h**

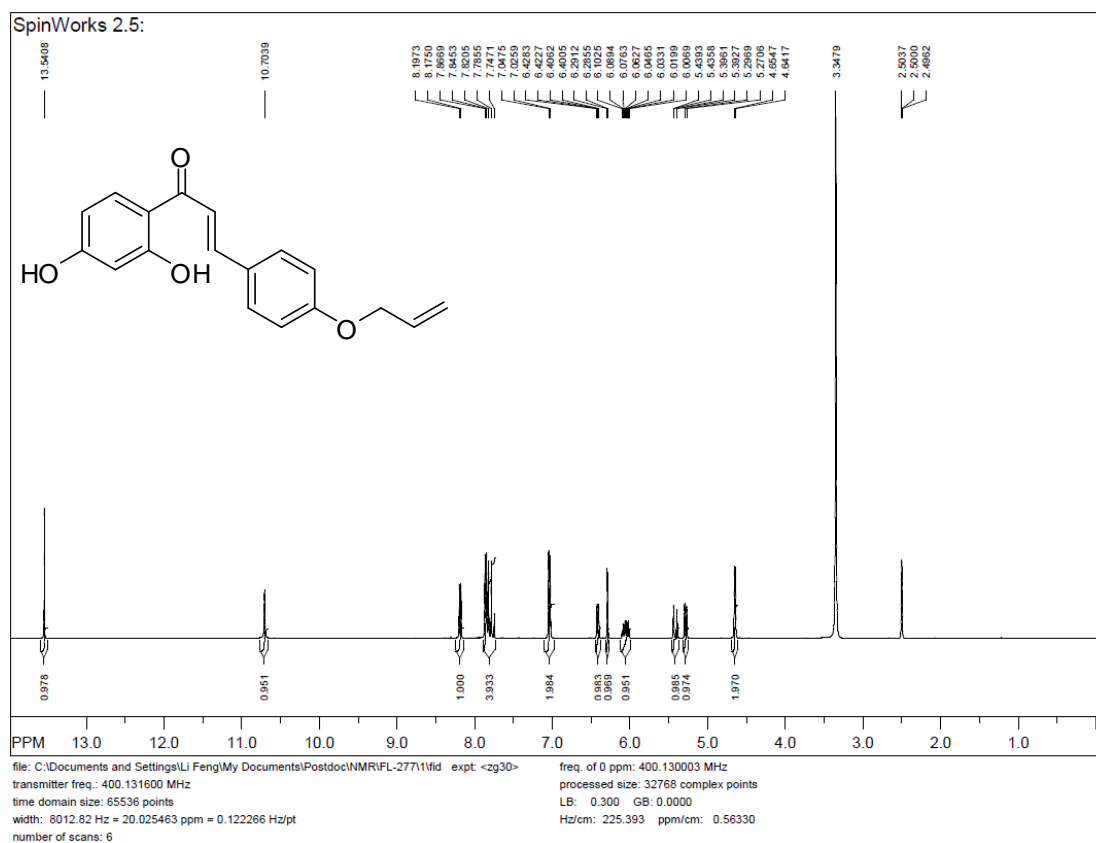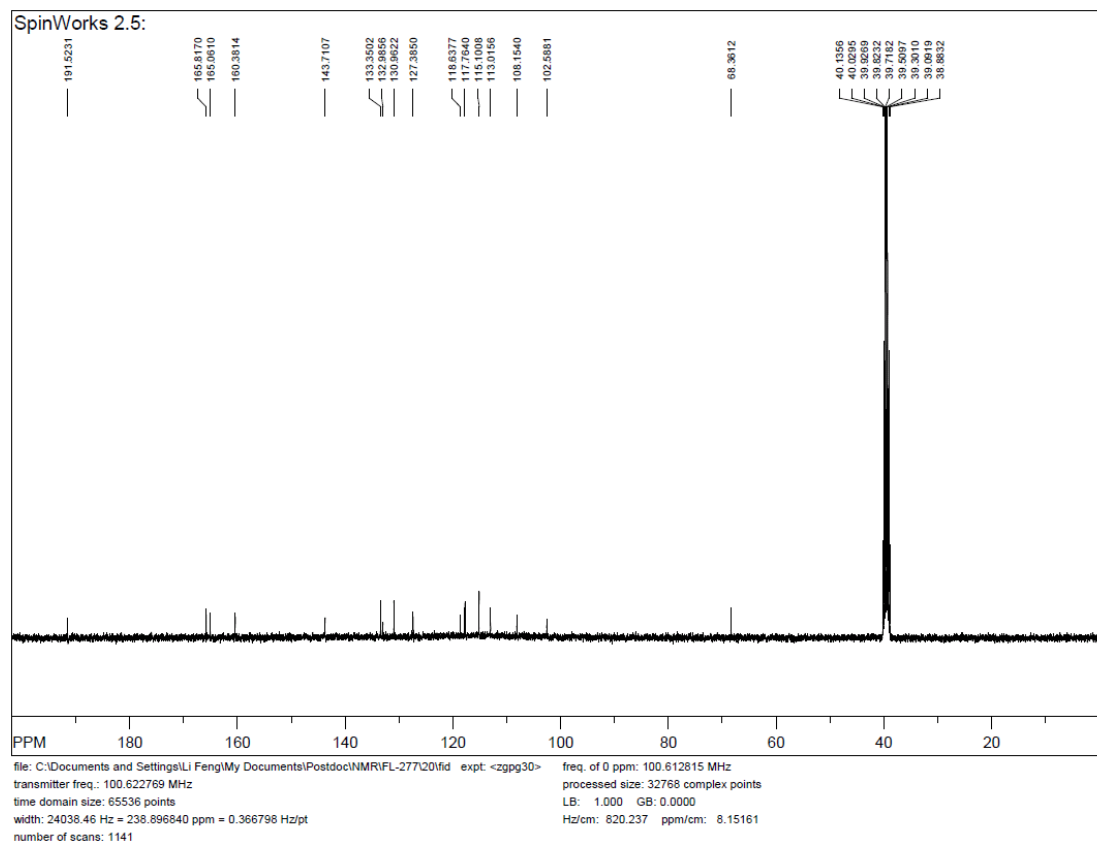

HPLC profile of 8h

==== Shimadzu LCsolution Analysis Report ====

Sample Name : FL-277-P  
 Tray# : 1  
 Vail # : 91  
 Injection Volume : 20 uL  
 Data File Name : FL-277-P.lcd  
 Method File Name : SDQ gradient.lcm  
 Batch File Name :  
 Data Acquired : 7/5/2012 1:33:34 PM

C:\LabSolutions\LCsolution\Sun\Feng\FL-277-P.lcd

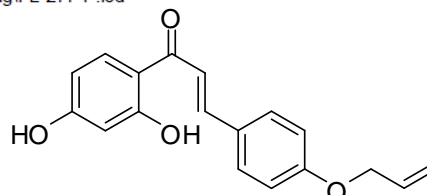

<Chromatogram>

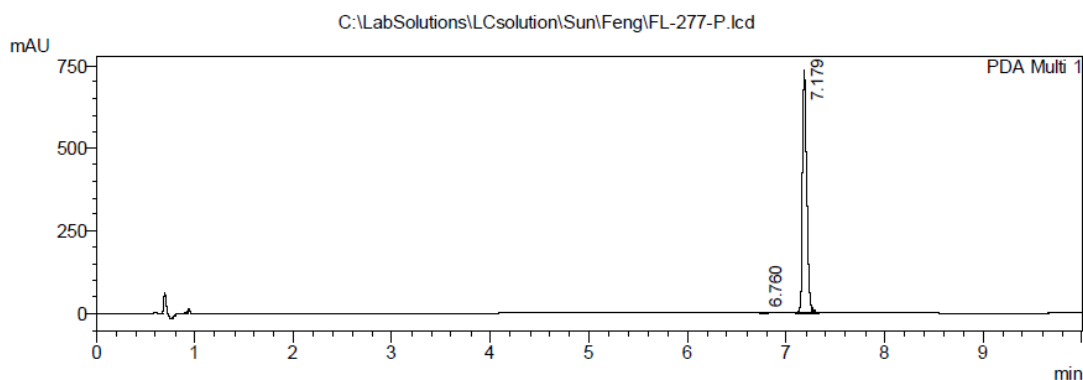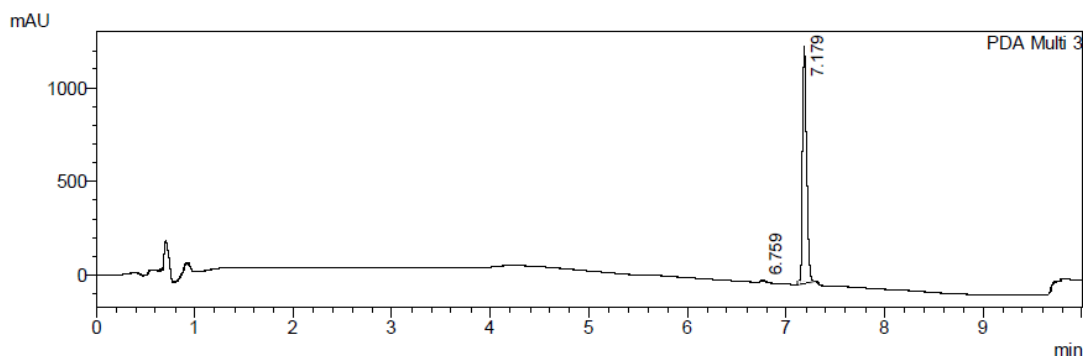

- 1 PDA Multi 1/254nm 4nm
- 2 PDA Multi 3/220nm 4nm

PeakTable

PDA Ch1 254nm 4nm

| Peak# | Ret. Time | Area    | Height | Area %  | Height % |
|-------|-----------|---------|--------|---------|----------|
| 1     | 6.760     | 5369    | 2472   | 0.246   | 0.338    |
| 2     | 7.179     | 2178745 | 729324 | 99.754  | 99.662   |
| Total |           | 2184114 | 731797 | 100.000 | 100.000  |

PeakTable

PDA Ch3 220nm 4nm

| Peak# | Ret. Time | Area    | Height  | Area %  | Height % |
|-------|-----------|---------|---------|---------|----------|
| 1     | 6.759     | 13216   | 7124    | 0.368   | 0.561    |
| 2     | 7.179     | 3582399 | 1262708 | 99.632  | 99.439   |
| Total |           | 3595615 | 1269832 | 100.000 | 100.000  |



# HRMS of 8h

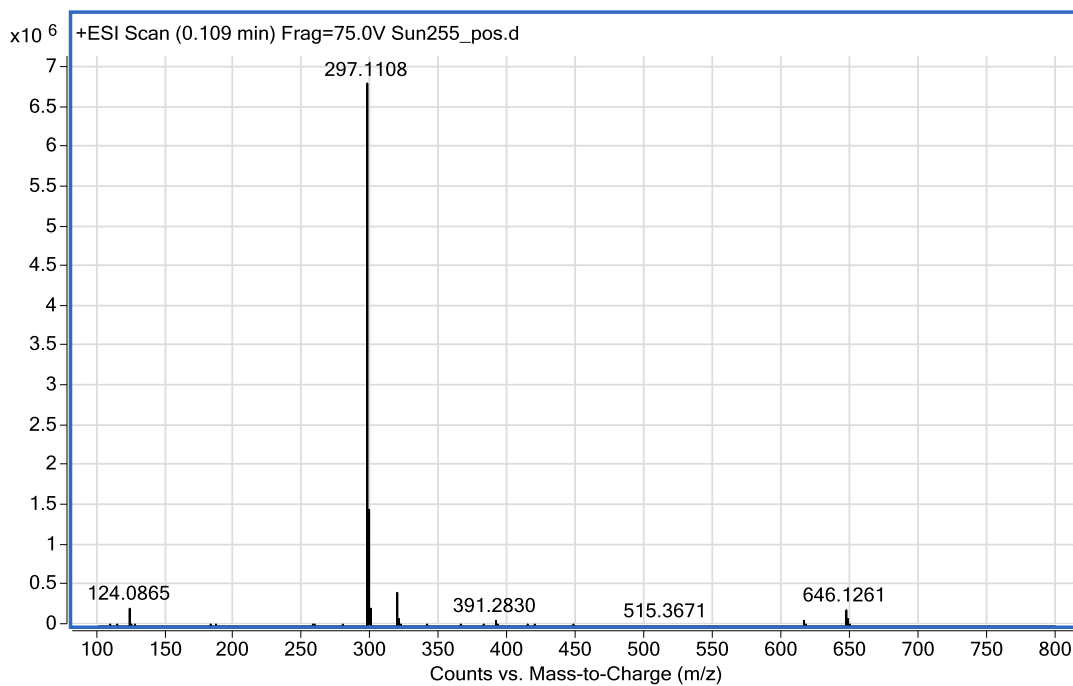

$^1\text{H}$  and  $^{13}\text{C}$  NMR spectra of **8i**

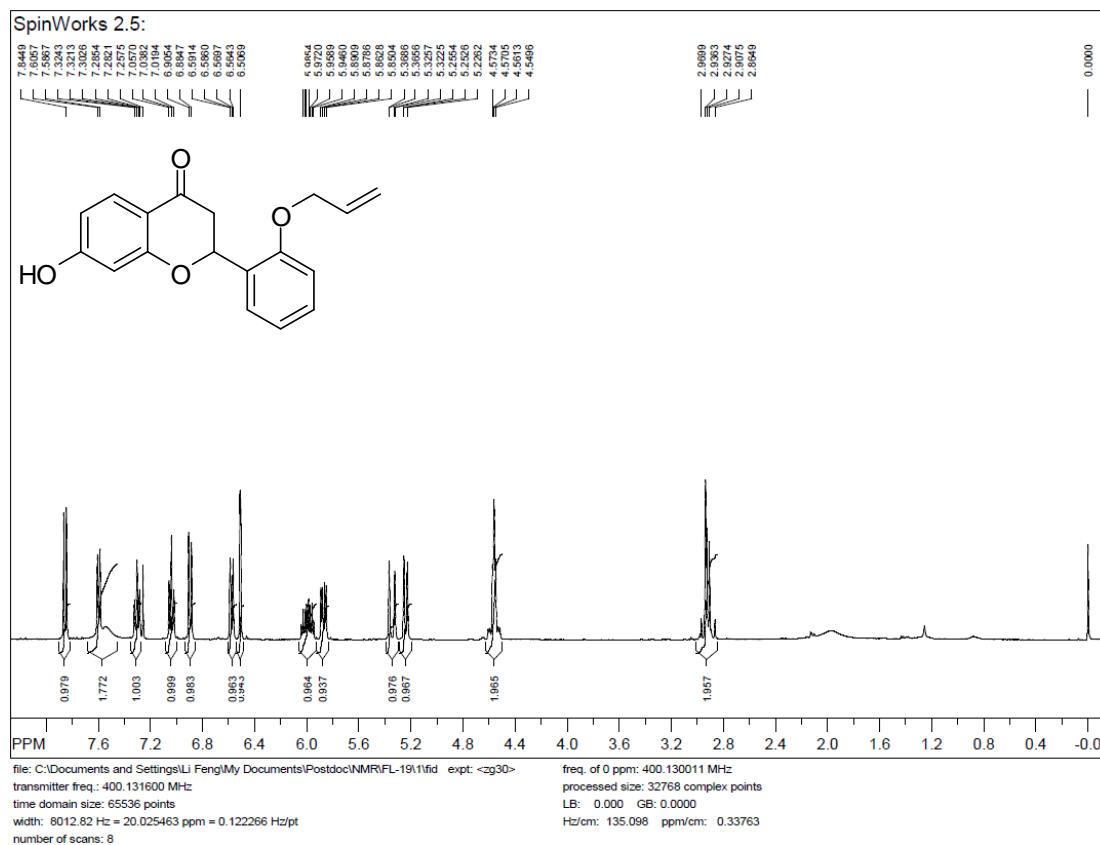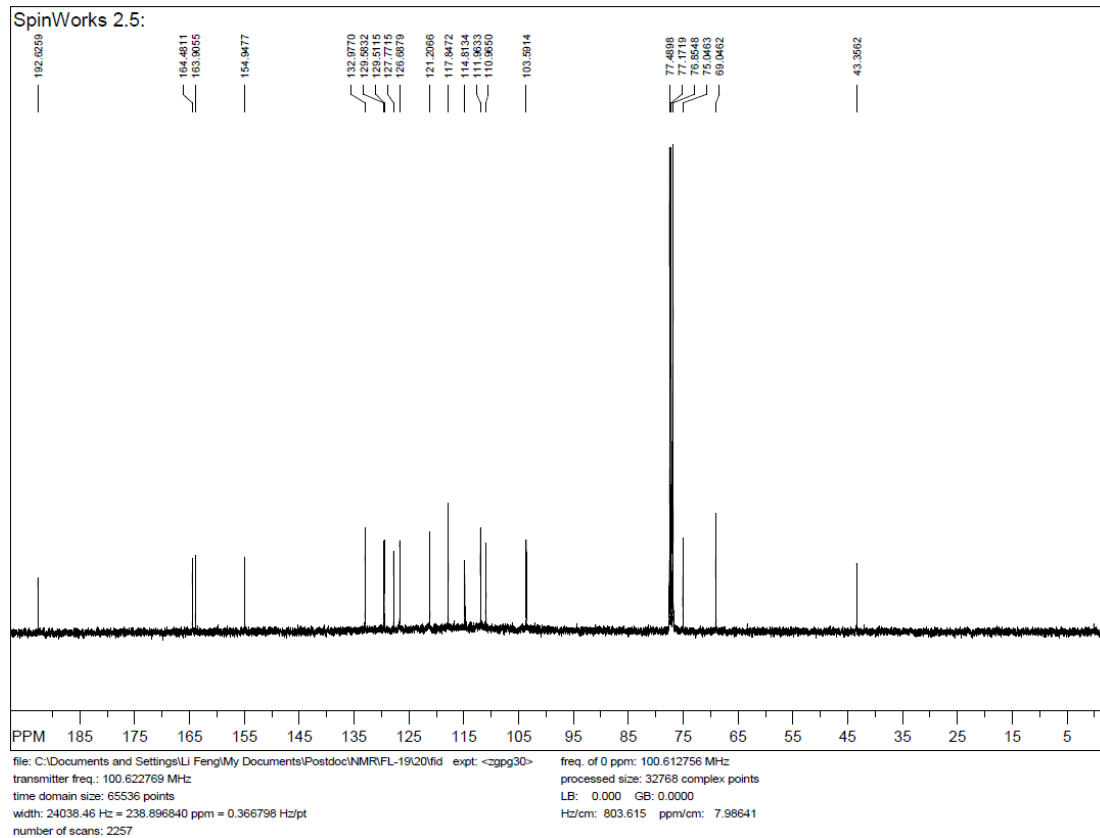

HPLC profile of 8i

==== Shimadzu LCsolution Analysis Report ====

Sample Name : FL-19-P  
 Tray# : 1  
 Vial # : 92  
 Injection Volume : 5 uL  
 Data File Name : FL-19-P.lcd  
 Method File Name : SDQ gradient.lcm  
 Batch File Name : Batch 1.lcb  
 Data Acquired : 12/2/2011 11:30:13 AM

C:\LabSolutions\LCsolution\Sun\Feng\FL-19-P.lcd

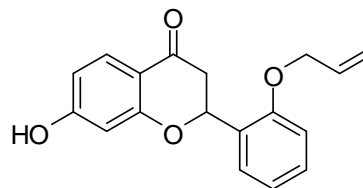

<Chromatogram>

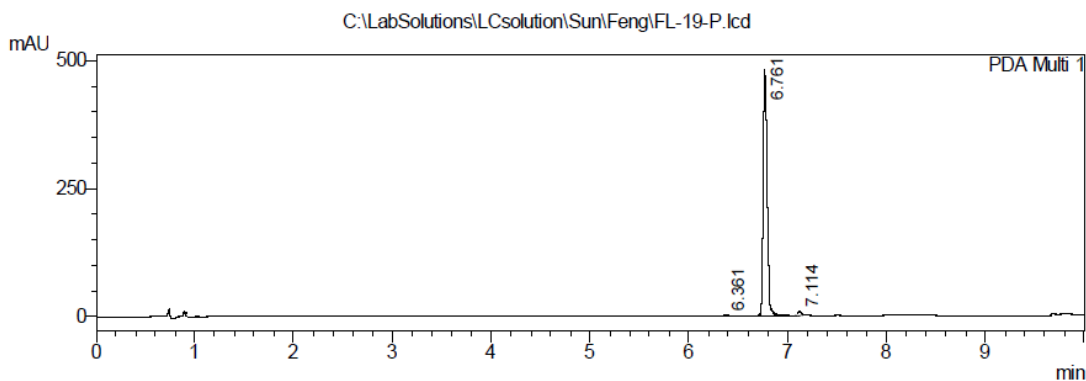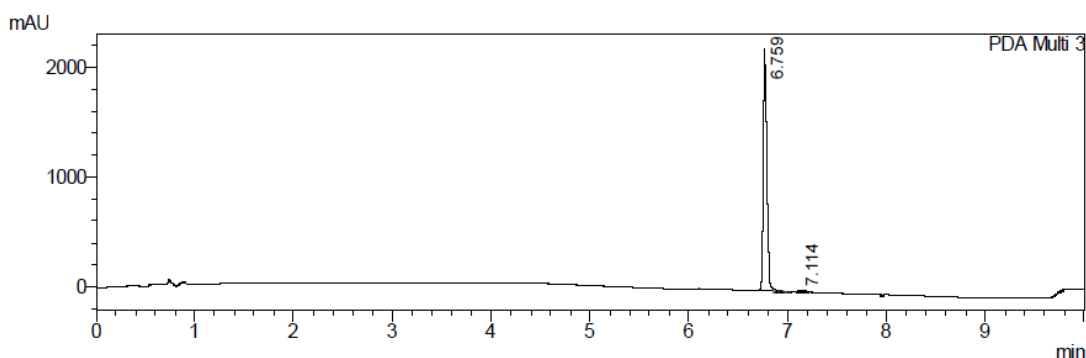

- 1 PDA Multi 1/254nm 4nm
- 2 PDA Multi 3/220nm 4nm

PeakTable

PDA Ch1 254nm 4nm

| Peak# | Ret. Time | Area    | Height | Area %  | Height % |
|-------|-----------|---------|--------|---------|----------|
| 1     | 6.361     | 4970    | 2057   | 0.397   | 0.429    |
| 2     | 6.761     | 1228161 | 469041 | 97.986  | 97.920   |
| 3     | 7.114     | 20276   | 7907   | 1.618   | 1.651    |
| Total |           | 1253407 | 479005 | 100.000 | 100.000  |

PeakTable

PDA Ch3 220nm 4nm

| Peak# | Ret. Time | Area    | Height  | Area %  | Height % |
|-------|-----------|---------|---------|---------|----------|
| 1     | 6.759     | 5006876 | 2212550 | 98.950  | 99.412   |
| 2     | 7.114     | 53148   | 13086   | 1.050   | 0.588    |
| Total |           | 5060025 | 2225636 | 100.000 | 100.000  |

# HRMS of 8i

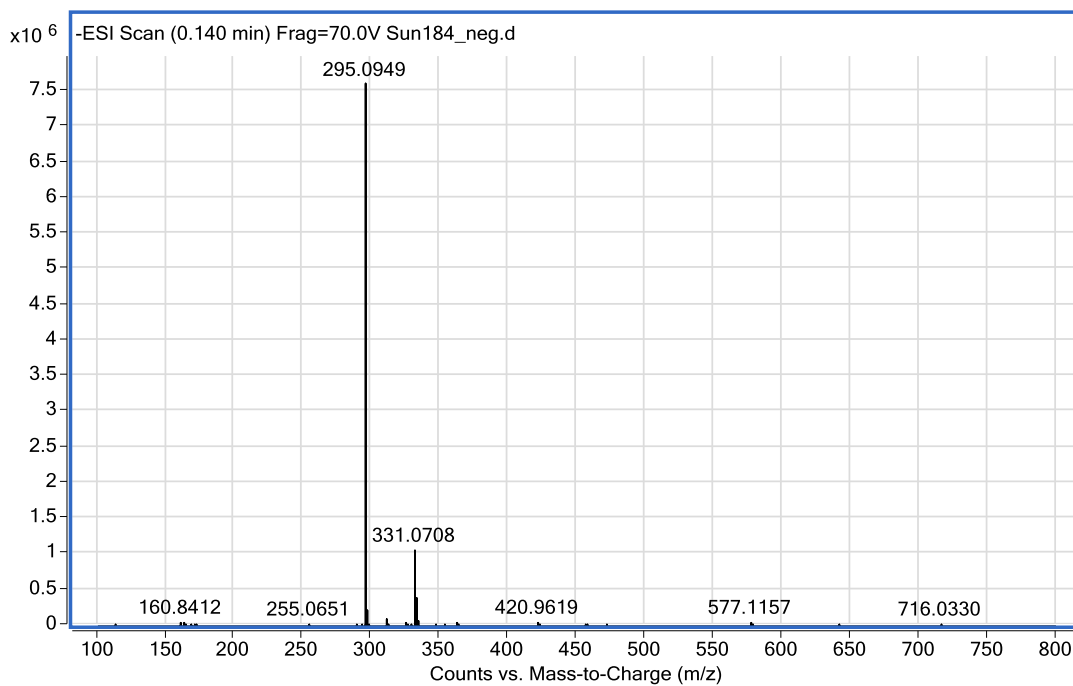

$^1\text{H}$  and  $^{13}\text{C}$  NMR spectra of **8j**

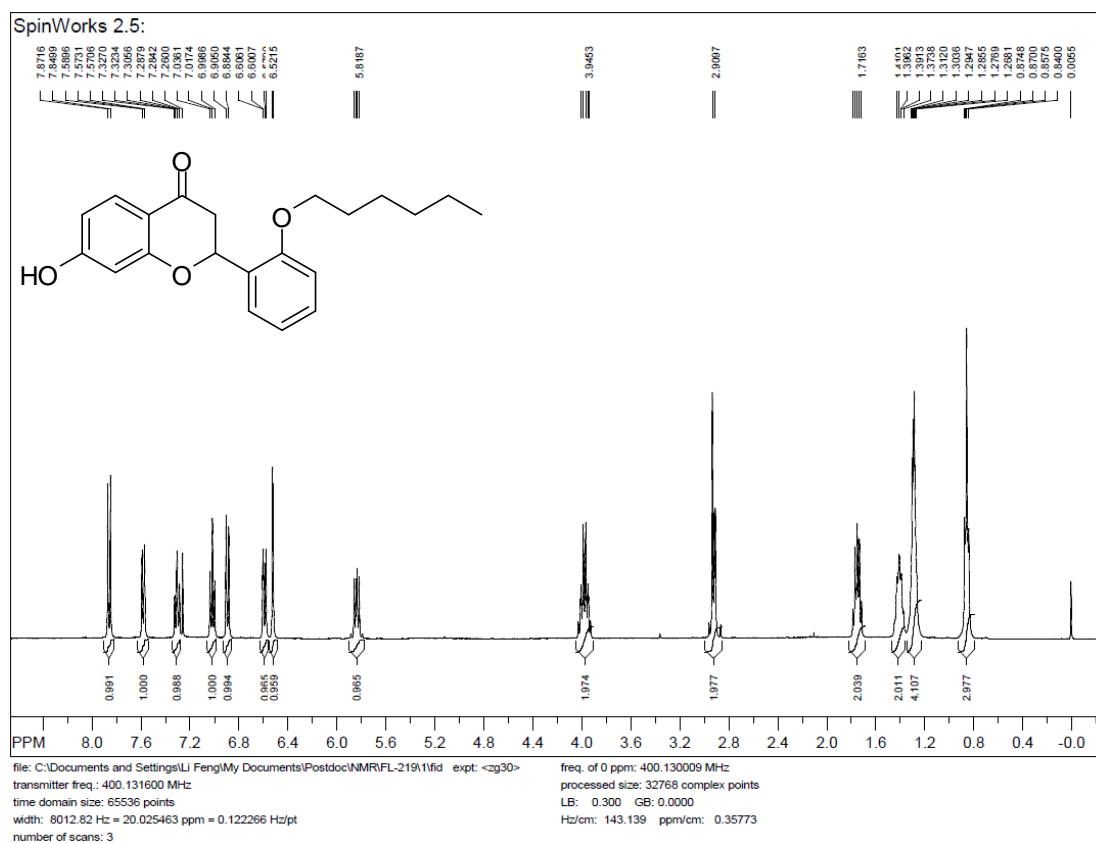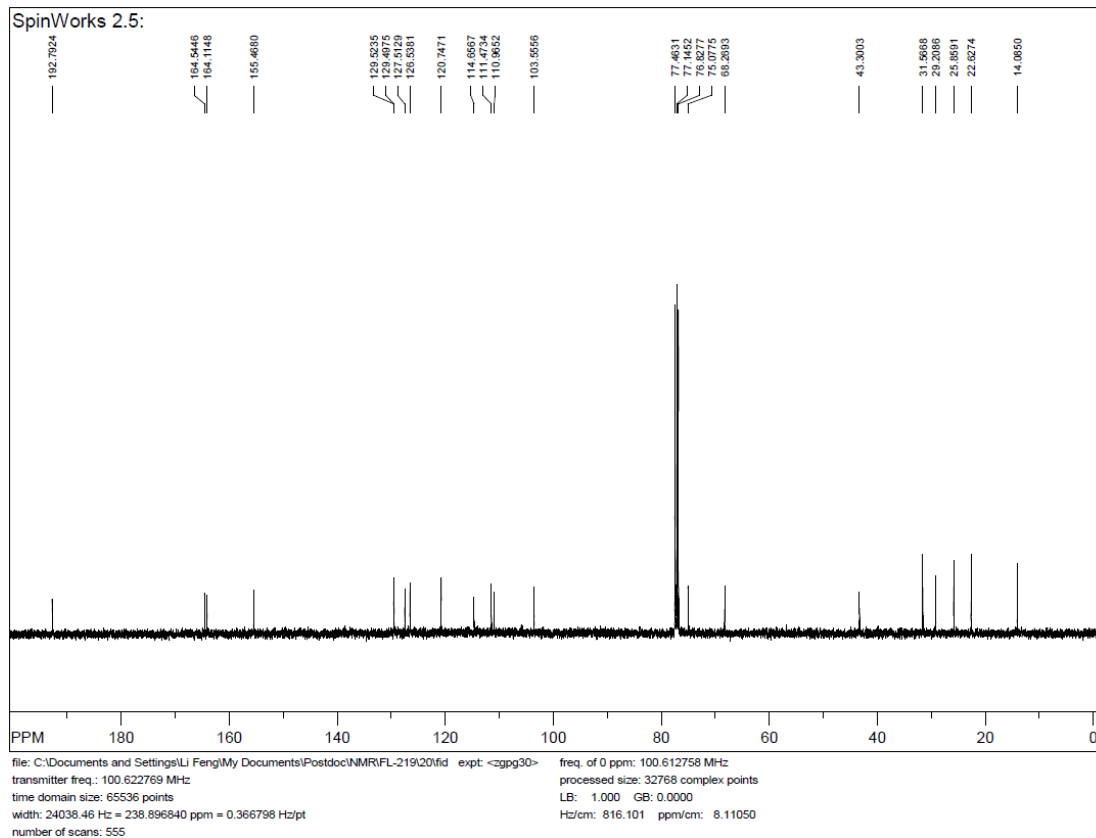

HPLC profile of 8j

==== Shimadzu LCsolution Analysis Report ====

Sample Name : FL-219-P  
 Tray# : 1  
 Vail # : 91  
 Injection Volume : 10 uL  
 Data File Name : FL-219-P.lcd  
 Method File Name : SDQ gradient.lcm  
 Batch File Name :  
 Data Acquired : 4/19/2012 11:05:59 AM

C:\LabSolutions\LCsolution\Sun\Feng\FL-219-P.lcd

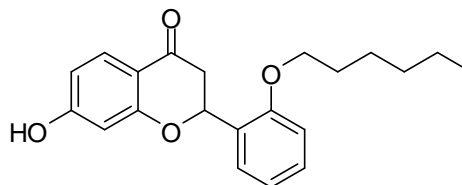

<Chromatogram>

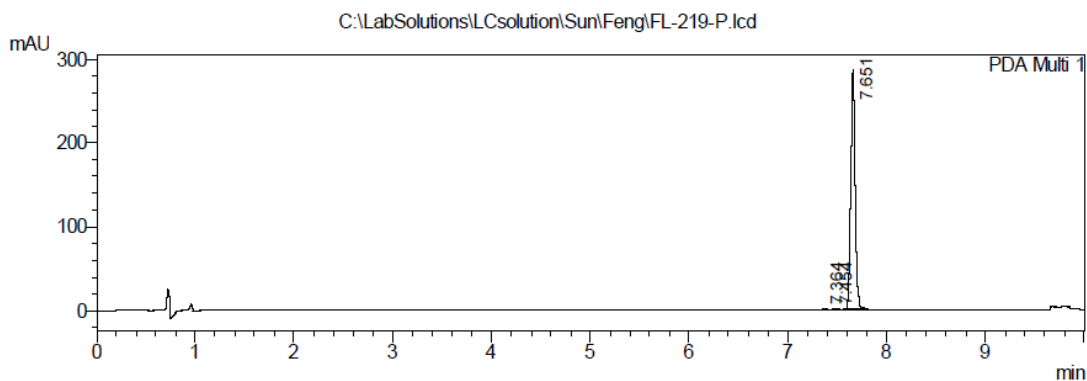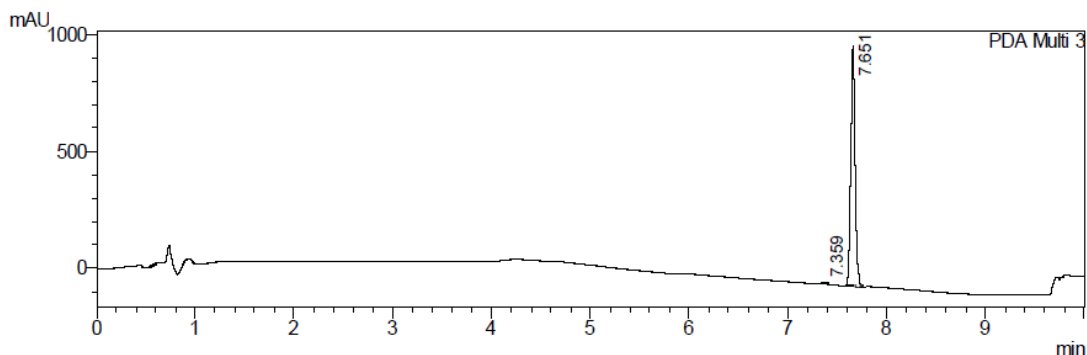

- 1 PDA Multi 1/254nm 4nm
- 2 PDA Multi 3/220nm 4nm

PeakTable

PDA Ch1 254nm 4nm

| Peak# | Ret. Time | Area   | Height | Area %  | Height % |
|-------|-----------|--------|--------|---------|----------|
| 1     | 7.364     | 277    | 181    | 0.035   | 0.064    |
| 2     | 7.454     | 157    | 91     | 0.020   | 0.032    |
| 3     | 7.651     | 801228 | 284171 | 99.946  | 99.904   |
| Total |           | 801661 | 284443 | 100.000 | 100.000  |

PeakTable

PDA Ch3 220nm 4nm

| Peak# | Ret. Time | Area    | Height  | Area %  | Height % |
|-------|-----------|---------|---------|---------|----------|
| 1     | 7.359     | 11768   | 5504    | 0.414   | 0.534    |
| 2     | 7.651     | 2830467 | 1024726 | 99.586  | 99.466   |
| Total |           | 2842235 | 1030230 | 100.000 | 100.000  |

# HRMS of 8j

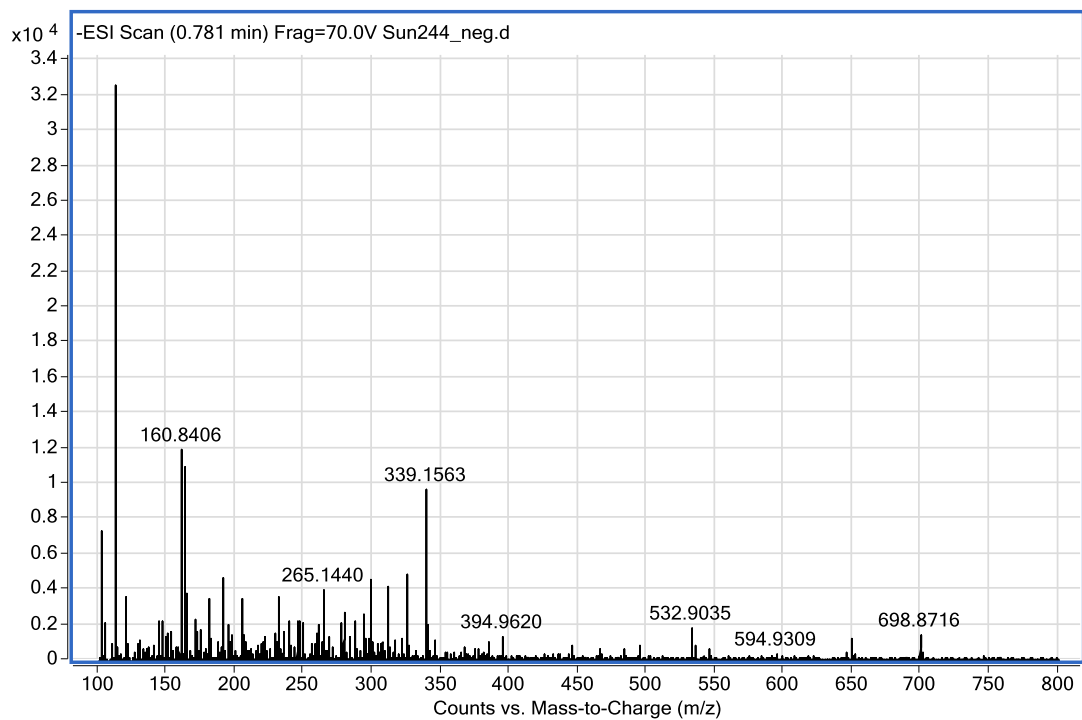

$^1\text{H}$  and  $^{13}\text{C}$  NMR spectra of **8k**

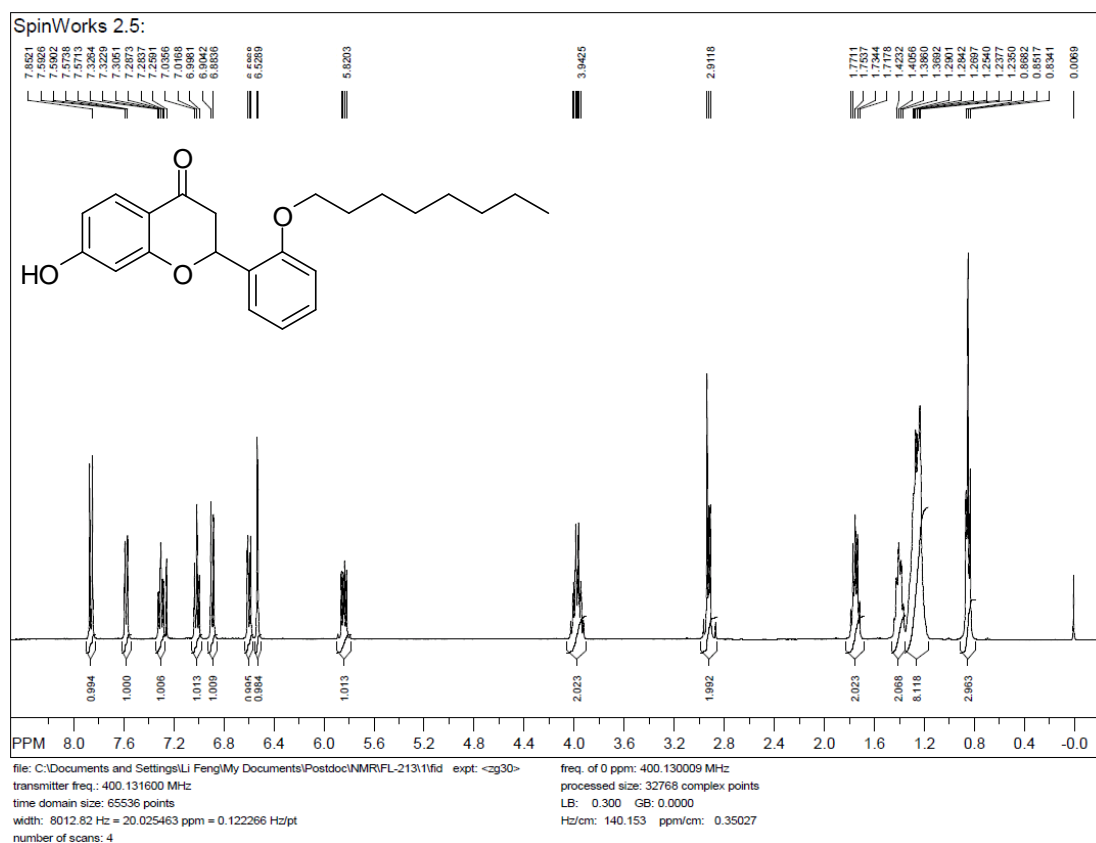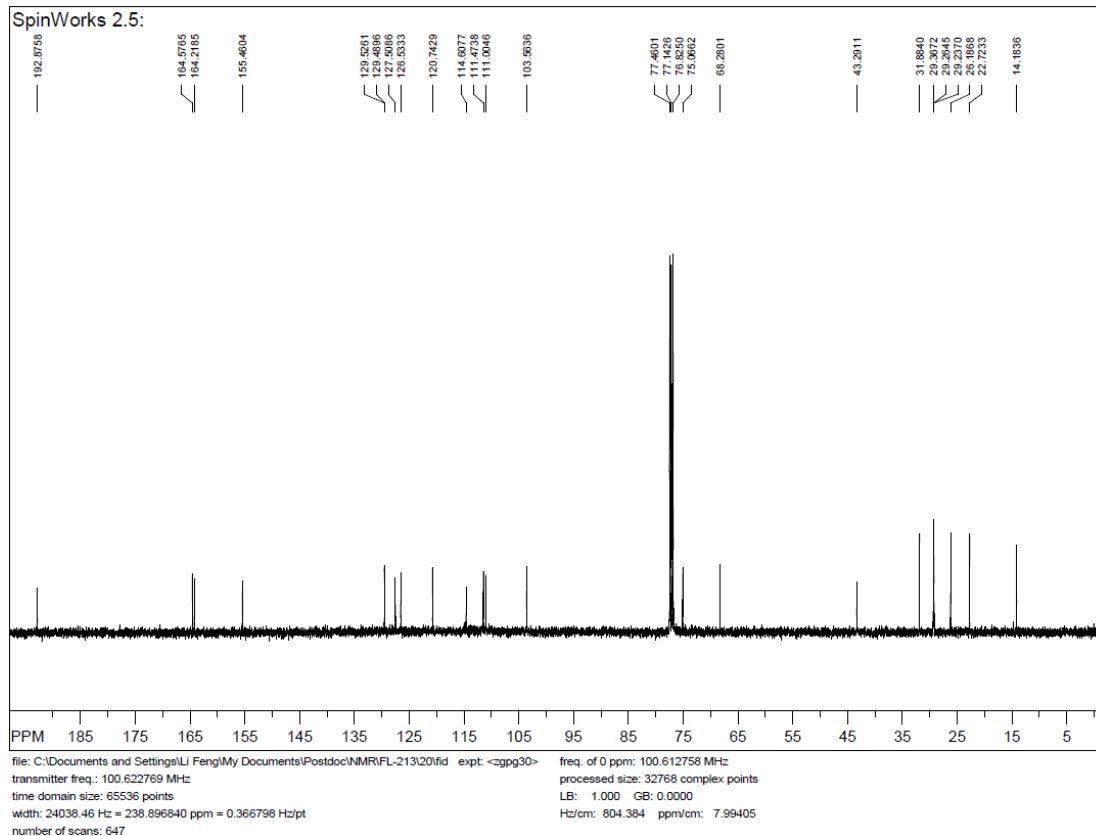



HPLC profile of 8k

## ==== Shimadzu LCsolution Analysis Report ====

Sample Name : FL-213-P  
 Tray# : 1  
 Vial # : 91  
 Injection Volume : 10 uL  
 Data File Name : FL-213-P.lcd  
 Method File Name : SDQ gradient.lcm  
 Batch File Name :  
 Data Acquired : 4/13/2012 2:09:17 PM

C:\LabSolutions\LCsolution\Sun\Feng\FL-213-P.lcd

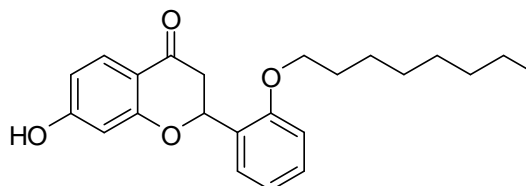

### <Chromatogram>

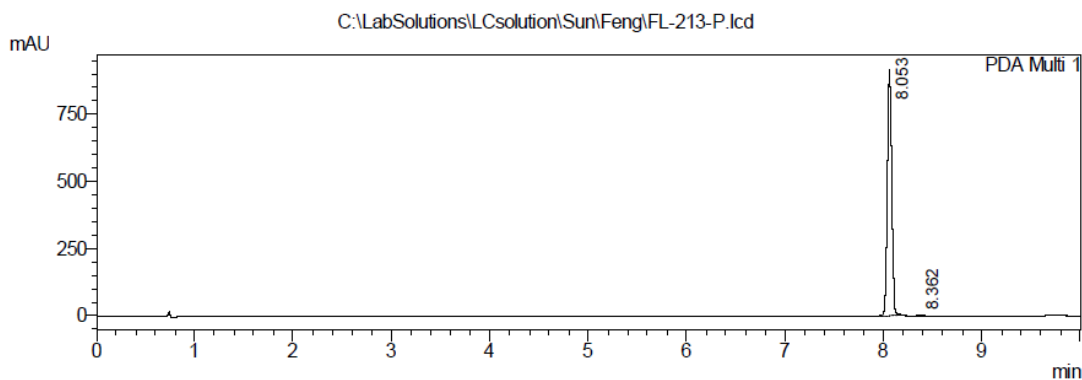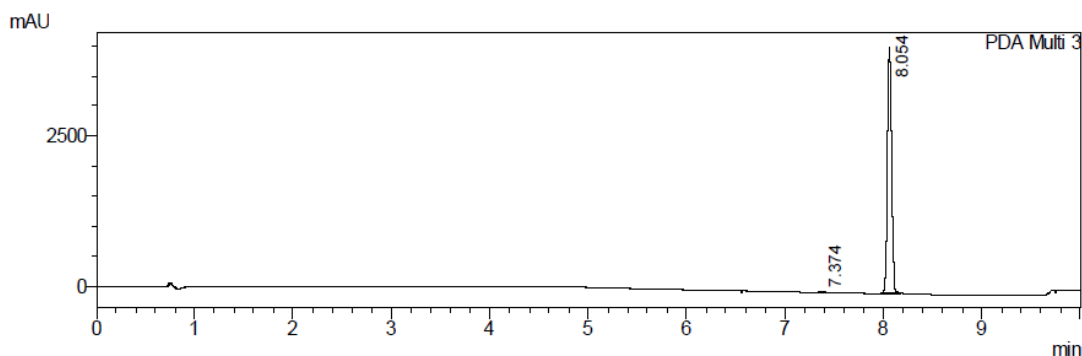

- 1 PDA Multi 1/254nm 4nm
- 2 PDA Multi 3/220nm 4nm

PeakTable

PDA Ch1 254nm 4nm

| Peak# | Ret. Time | Area    | Height | Area %  | Height % |
|-------|-----------|---------|--------|---------|----------|
| 1     | 8.053     | 2585666 | 912445 | 99.902  | 99.874   |
| 2     | 8.362     | 2537    | 1155   | 0.098   | 0.126    |
| Total |           | 2588203 | 913600 | 100.000 | 100.000  |

PeakTable

PDA Ch3 220nm 4nm

| Peak# | Ret. Time | Area     | Height  | Area %  | Height % |
|-------|-----------|----------|---------|---------|----------|
| 1     | 7.374     | 13629    | 7606    | 0.124   | 0.186    |
| 2     | 8.054     | 10948403 | 4082189 | 99.876  | 99.814   |
| Total |           | 10962032 | 4089795 | 100.000 | 100.000  |

# HRMS of 8k

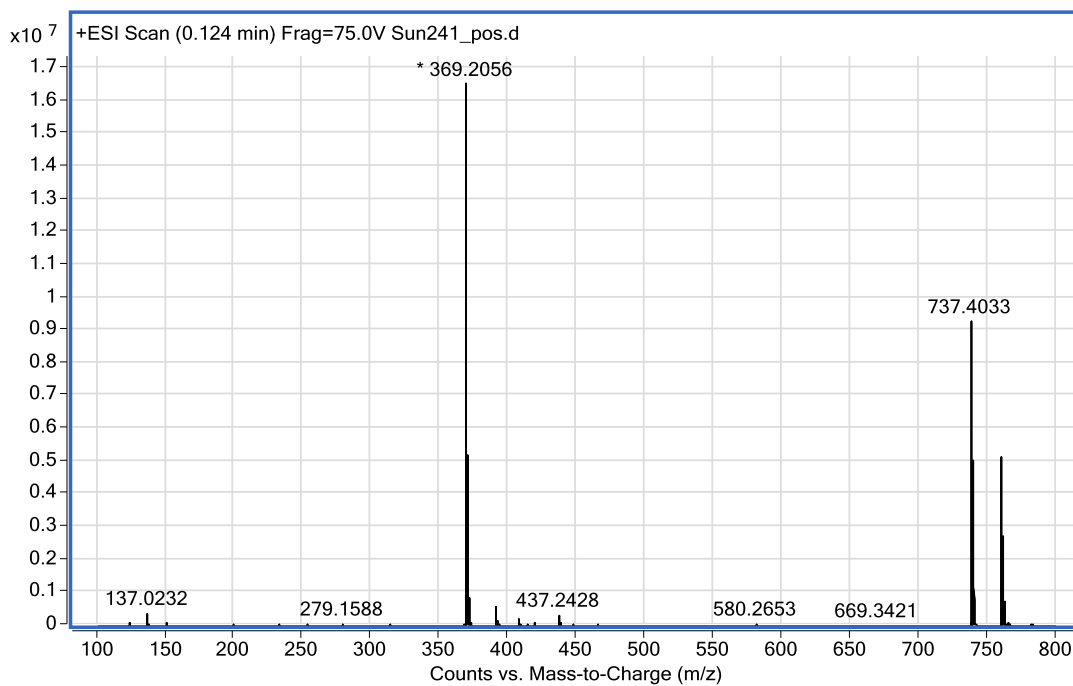

$^1\text{H}$  and  $^{13}\text{C}$  NMR spectra of **81**

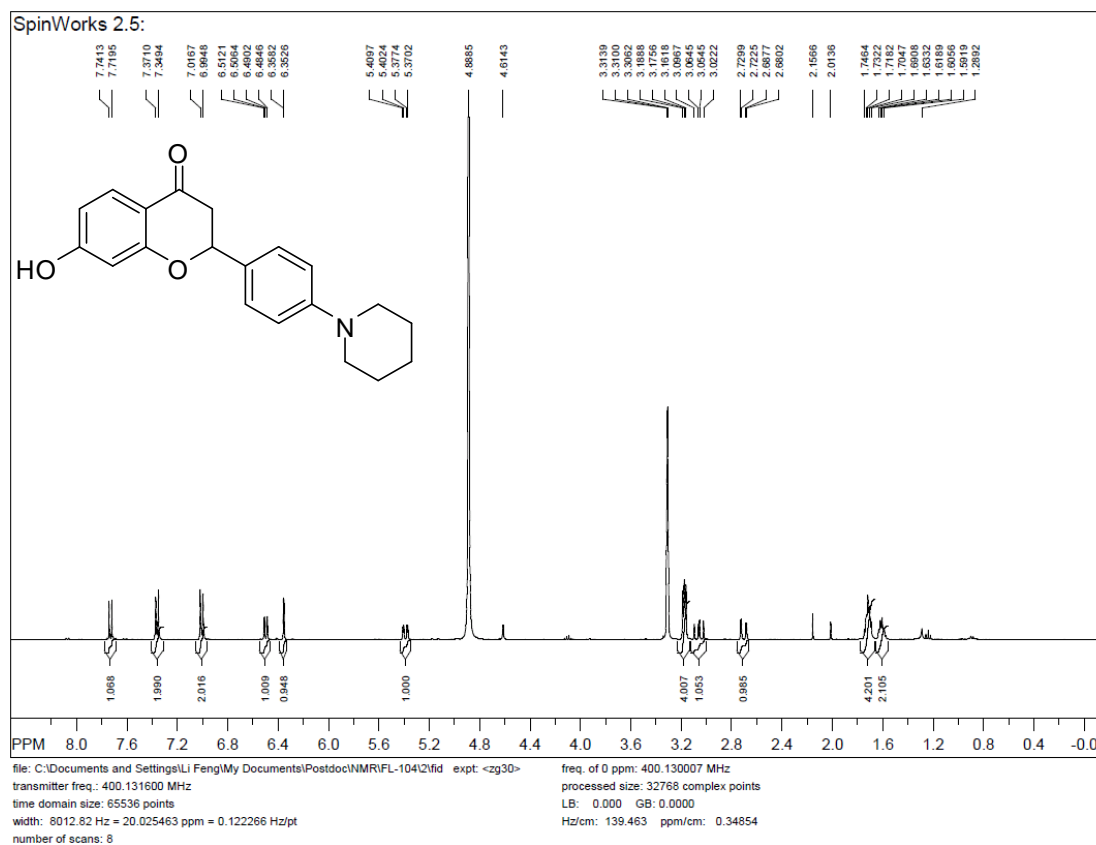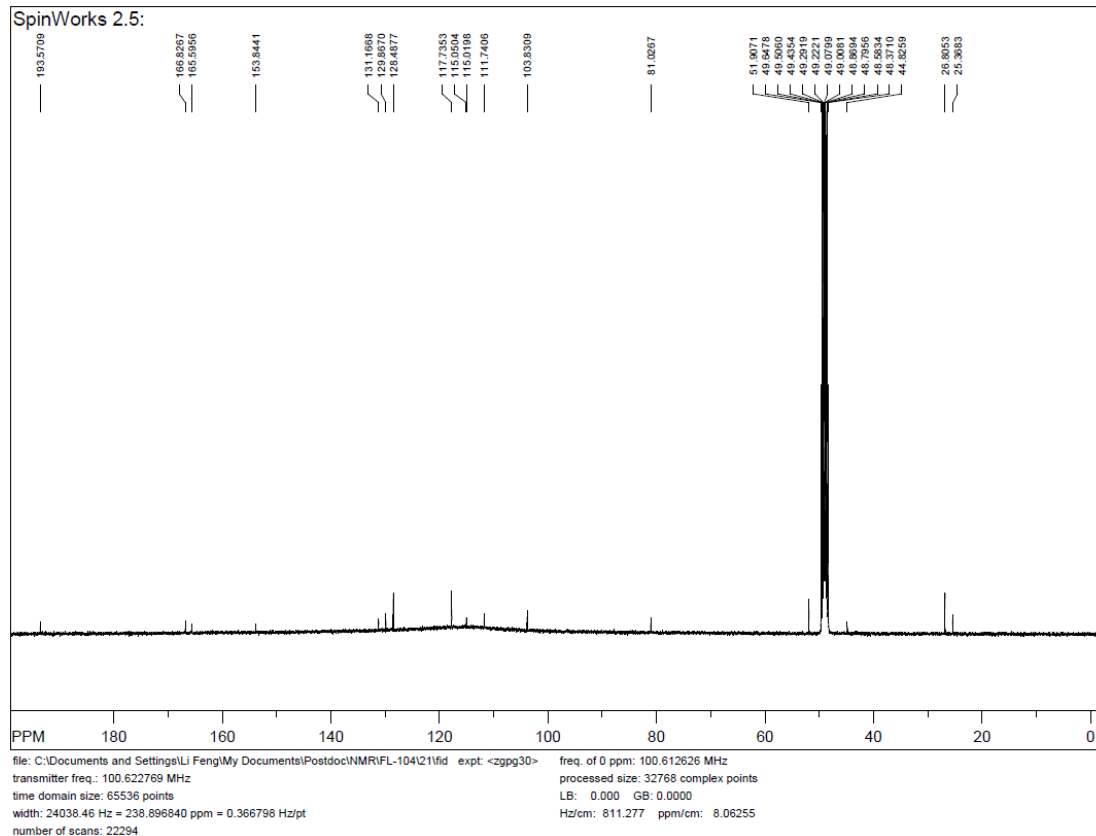

HPLC profile of 81

==== Shimadzu LCsolution Analysis Report ====

Sample Name : FL-104-P  
 Tray# : 1  
 Vial # : 91  
 Injection Volume : 12 uL  
 Data File Name : FL-104-P.lcd  
 Method File Name : SDQ gradient.lcm  
 Batch File Name :  
 Data Acquired : 1/9/2012 5:28:41 PM

C:\LabSolutions\LCsolution\Sun\Feng\FL-104-P.lcd

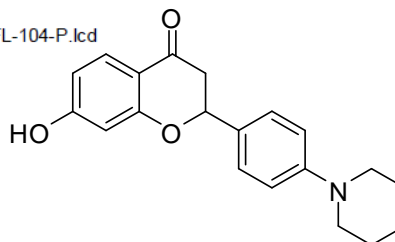

<Chromatogram>

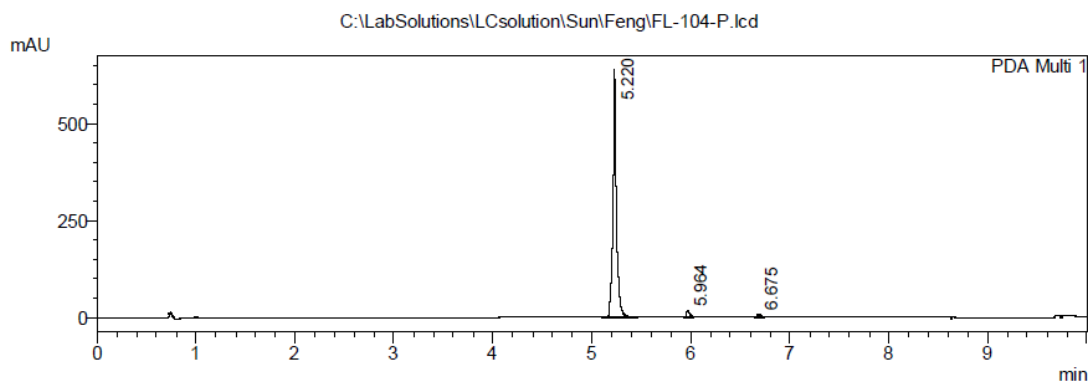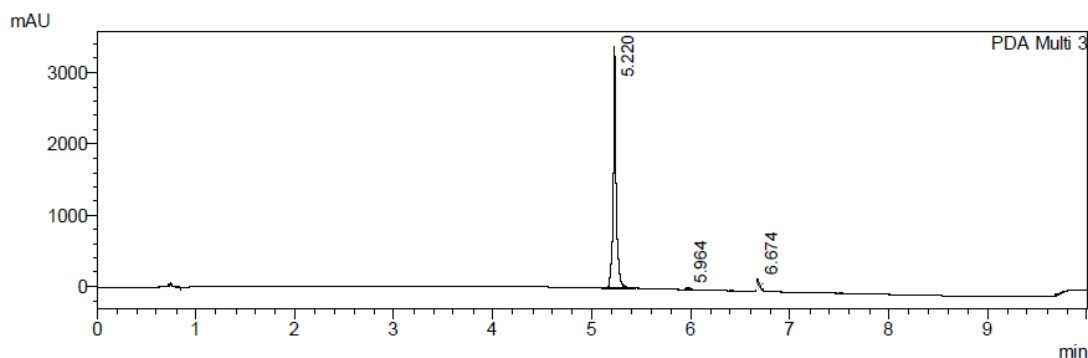

- 1 PDA Multi 1/254nm 4nm
- 2 PDA Multi 3/220nm 4nm

PeakTable

PDA Ch1 254nm 4nm

| Peak# | Ret. Time | Area    | Height | Area %  | Height % |
|-------|-----------|---------|--------|---------|----------|
| 1     | 5.220     | 1817452 | 636873 | 97.357  | 96.712   |
| 2     | 5.964     | 32317   | 14413  | 1.731   | 2.189    |
| 3     | 6.675     | 17026   | 7242   | 0.912   | 1.100    |
| Total |           | 1866796 | 658528 | 100.000 | 100.000  |

PeakTable

PDA Ch3 220nm 4nm

| Peak# | Ret. Time | Area    | Height  | Area %  | Height % |
|-------|-----------|---------|---------|---------|----------|
| 1     | 5.220     | 8360664 | 3379359 | 98.652  | 97.696   |
| 2     | 5.964     | 19959   | 13573   | 0.236   | 0.392    |
| 3     | 6.674     | 94314   | 66114   | 1.113   | 1.911    |
| Total |           | 8474937 | 3459047 | 100.000 | 100.000  |

# HRMS of **81**

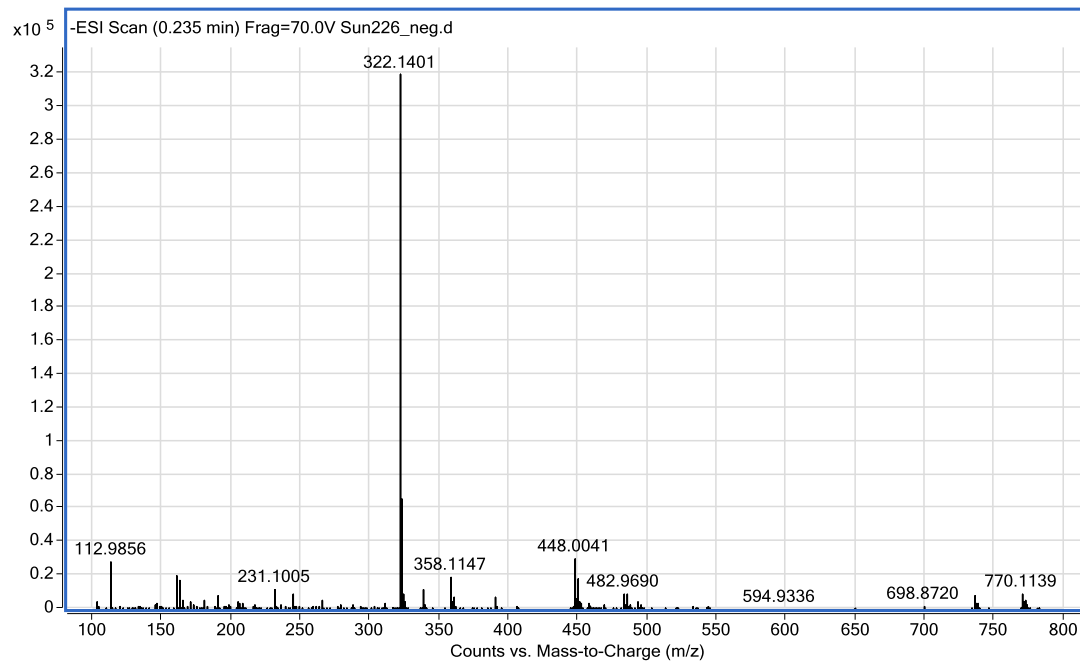

<sup>1</sup>H and <sup>13</sup>C NMR spectra of **8m**

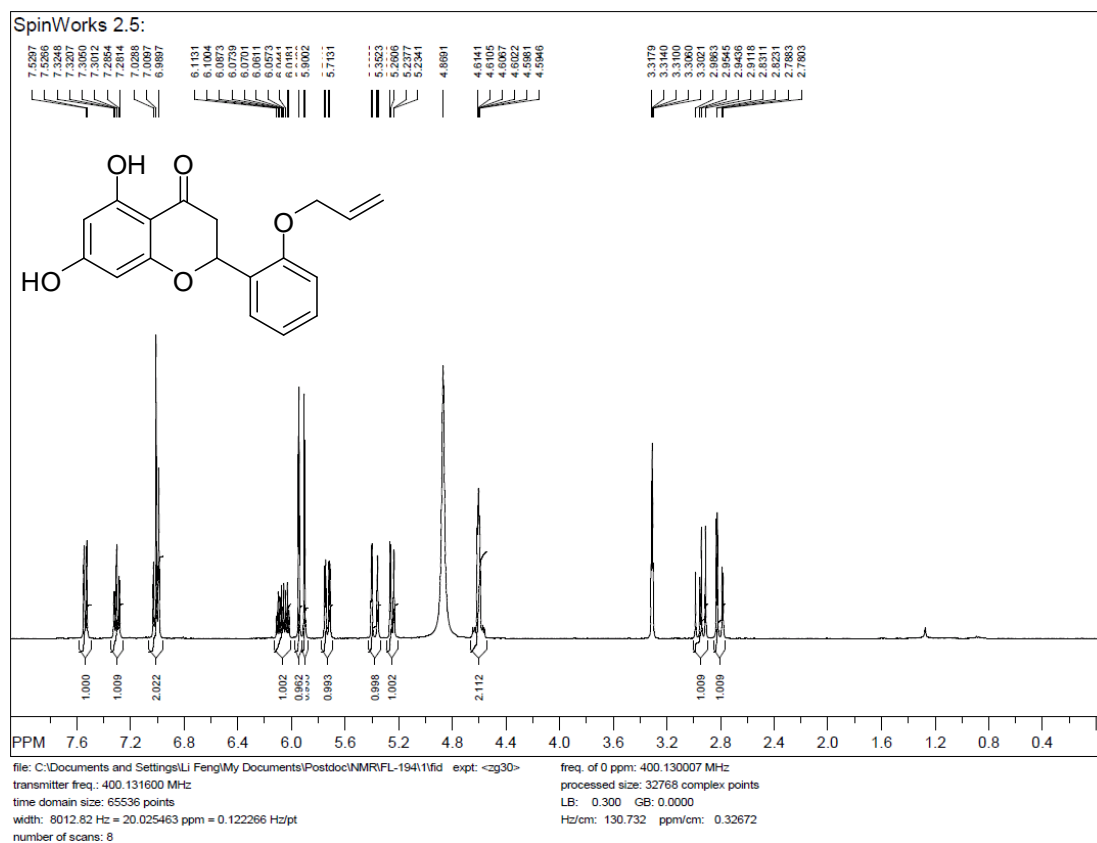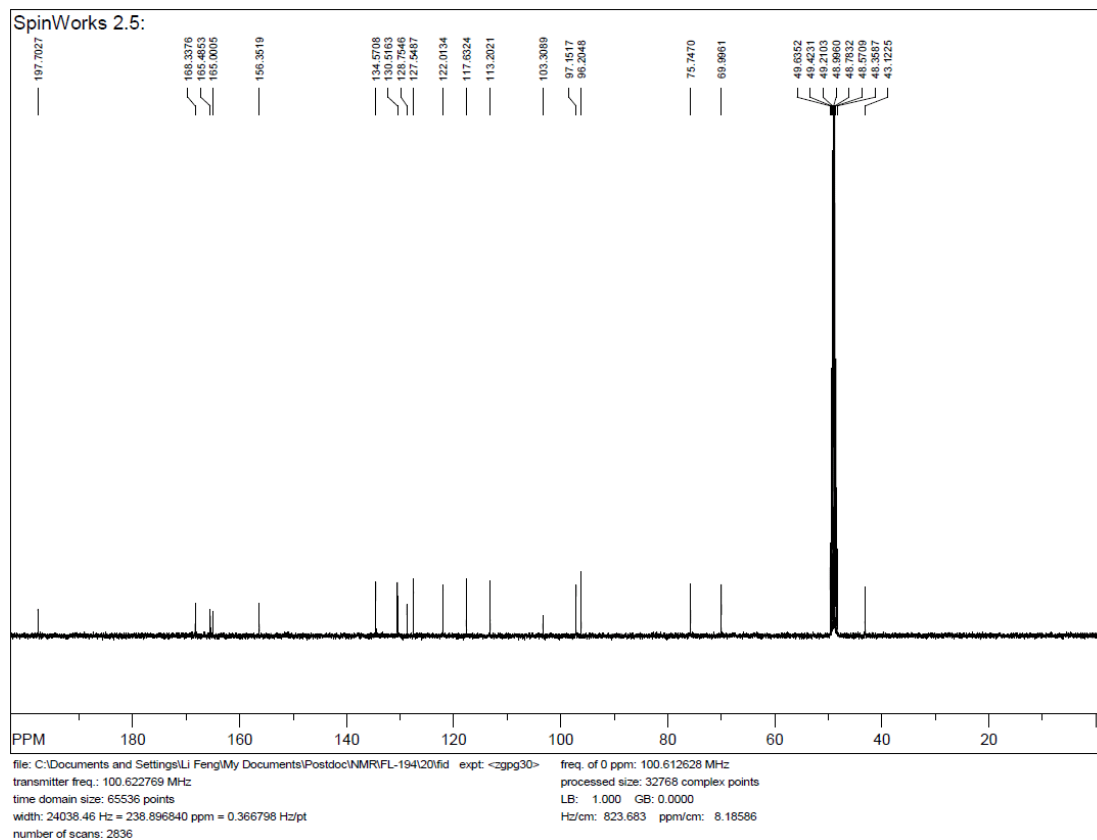

HPLC profile of 8m

==== Shimadzu LCsolution Analysis Report ====

Sample Name : FL-194-P  
 Tray# : 1  
 Vail # : 91  
 Injection Volume : 15 uL  
 Data File Name : FL-194-P.lcd  
 Method File Name : SDQ gradient.lcm  
 Batch File Name :  
 Data Acquired : 3/21/2012 3:10:36 PM

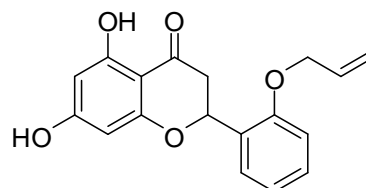

<Chromatogram>

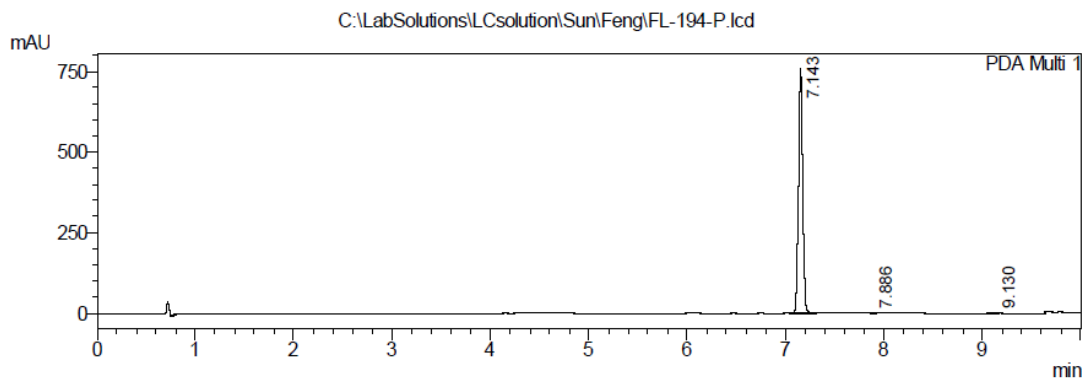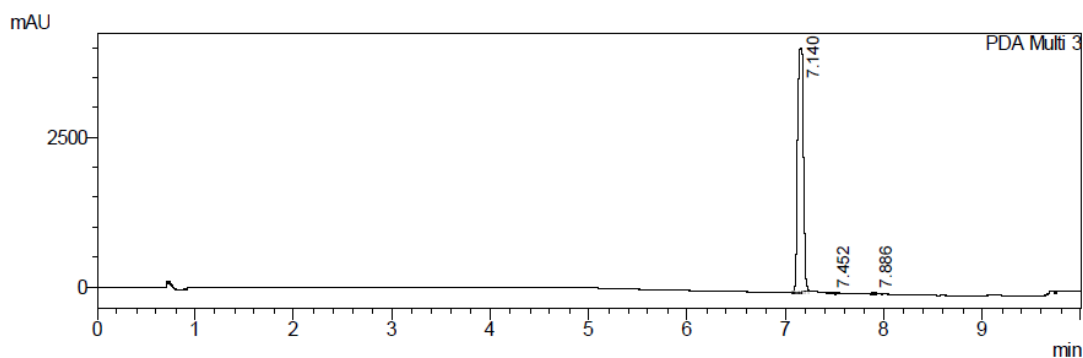

- 1 PDA Multi 1/254nm 4nm
- 2 PDA Multi 3/220nm 4nm

PeakTable

PDA Ch1 254nm 4nm

| Peak# | Ret. Time | Area    | Height | Area %  | Height % |
|-------|-----------|---------|--------|---------|----------|
| 1     | 7.143     | 2092674 | 739887 | 99.815  | 99.723   |
| 2     | 7.886     | 2882    | 1525   | 0.137   | 0.206    |
| 3     | 9.130     | 1006    | 527    | 0.048   | 0.071    |
| Total |           | 2096561 | 741940 | 100.000 | 100.000  |

PeakTable

PDA Ch3 220nm 4nm

| Peak# | Ret. Time | Area     | Height  | Area %  | Height % |
|-------|-----------|----------|---------|---------|----------|
| 1     | 7.140     | 15611265 | 4073885 | 99.640  | 99.307   |
| 2     | 7.452     | 14910    | 7418    | 0.095   | 0.181    |
| 3     | 7.886     | 41434    | 21009   | 0.264   | 0.512    |
| Total |           | 15667609 | 4102312 | 100.000 | 100.000  |

# HRMS of 8m

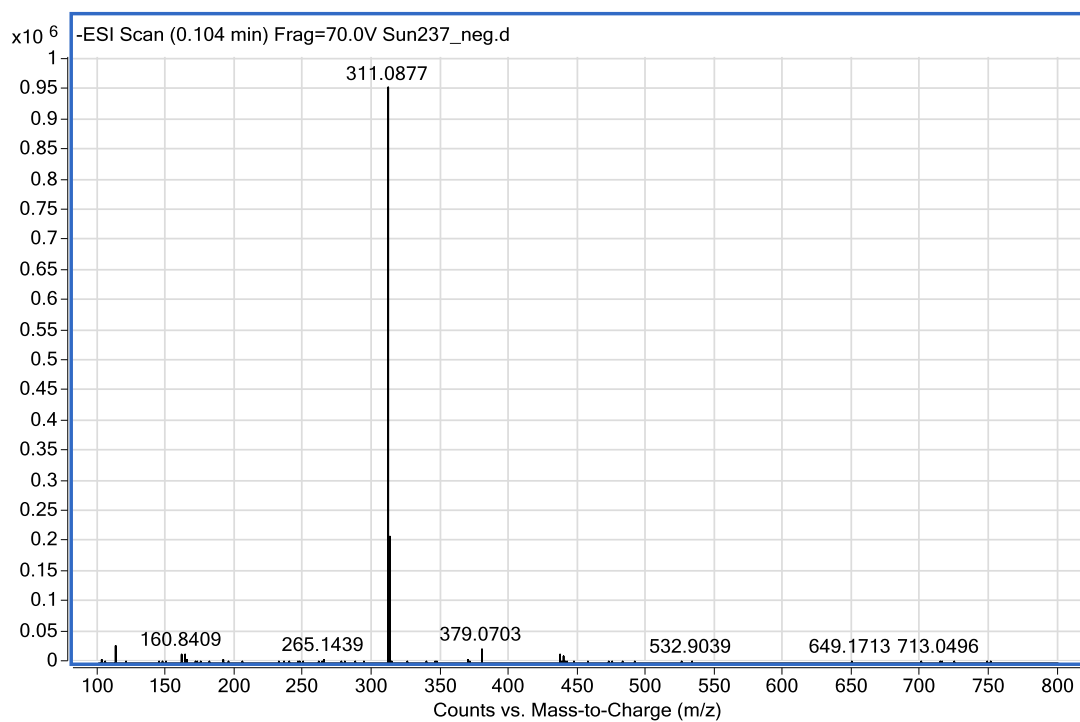



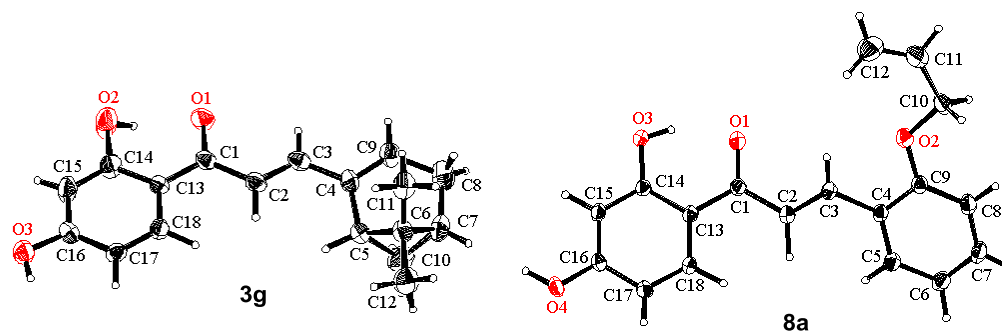

**Figure S1.** ORTEP views of the molecular structures of **3g** and **8a**. ORTEP drawing of **3g** showing one of the two crystallographically independent molecules in the asymmetric unit; displacement ellipsoids are drawn at the 20% probability level at 298 K. For **8a**, displacement ellipsoids are drawn at the 20% probability level at 298 K.

X-ray Crystal Structure of **3g**. A parallelepiped of **3g**, recrystallized from ethyl acetate and hexane, of approximate dimensions  $0.25 \times 0.25 \times 0.20$  mm was mounted on a glass fiber. X-ray data were collected at 298 K using a Nonius Kappa CCD diffractometer to a maximum  $2\theta$  of  $60.1^\circ$  with monochromatic Mo  $K\alpha$  radiation; 8822 unique reflections were collected. The data were integrated and scaled using the HKL suite of XdisplayF, Denzo and Scalepack. Unit cell parameters were retrieved and refined on all reflections. Crystal data for **3g**:  $C_{18}H_{20}O_3$ ,  $M = 284.35$ , monoclinic space group  $P2_1$ ,  $a = 15.3222(8)$  Å,  $b = 7.3574(3)$  Å,  $c = 15.4514(7)$  Å,  $\beta = 114.057(3)^\circ$ ,  $V = 1590.56(13)$  Å<sup>3</sup>,  $Z = 4$ ,  $\rho = 1.187$  g/cm<sup>3</sup>,  $\mu = 0.079$  mm<sup>-1</sup>. The structure was solved by directed methods (SHELXD). All non-H atoms were refined anisotropically and H atoms refined isotropically with fixed B values of  $5$  Å<sup>2</sup> in the full-matrix least-squares refinement cycle on F, which converged at  $R = 0.0601$ ,  $wR = 0.0688$  and  $GOF = 1.146$  for 2571 reflections with  $I > 3\sigma(I)$ ; a Robust-resistant weighting scheme was used in the least-squares refinements of the 379 variables. The final Fourier difference map revealed

max./min. peaks of 0.32 and -0.41 e-/Å<sup>3</sup> at chemically implausible positions. X-ray Crystal Structure of **8a**. A parallelepiped of **8a**, recrystallized from ethyl acetate and hexane, of approximate dimensions 0.30 × 0.30 × 0.25 mm was mounted on a glass fiber. X-ray data were collected at 298 K using a Nonius Kappa CCD diffractometer to a maximum 2θ of 63.9° with monochromatic Mo Kα radiation; 5080 unique reflections were collected. The data were integrated and scaled using the HKL suit of XdisplayF, Denzo and Scalepack. Unit cell parameters were retrieved and refined on all reflections. Crystal data for **8a**: C<sub>18</sub>H<sub>16</sub>O<sub>4</sub>, M = 296.32, orthorhombic space group Pbca, a = 8.0566(2) Å, b = 13.7233(4) Å, c = 27.1736(8) Å, V = 3004.40(2) Å<sup>3</sup>, Z = 8, ρ = 1.310 g/cm<sup>3</sup>, μ = 0.092 mm<sup>-1</sup>. The structure was solved by directed methods (SHELXD). All non-H atoms were refined anisotropically and H's isotropically in the full-matrix least-squares refinement cycle on F, which converged at R = 0.0768, wR = 0.0927 and GOF = 1.008 for 1685 reflections with I > 3σ(I); a Robust-resistant weighting scheme was used in the least-squares refinements of the 254 variables. The final Fourier difference map revealed max./min. peaks of 1.21 and -0.53 e-/Å<sup>3</sup>, indicating some disorder about the C10-C11 propylene single bond. All crystallographic calculations were performed using Crystal Structure Analysis Package (4.0), Rigaku Corporation. Crystallographic data (excluding structure factor tables) for **3g** (CCDC 1004364) and **8a** (CCDC 1004363) have been deposited with the Cambridge Crystallographic Data Centre. Copies of the data can be obtained free of charge, on application to the Director, CCDC, 12 Union Road, Cambridge CB2 1Ez (fax: +44(0)1223-336033 or e-mail: [deposit@ccdc.cam.ac.uk](mailto:deposit@ccdc.cam.ac.uk)).

A) Inhibition of *E. coli* DNA gyrase by **8a**, **3g**, and **2a**.

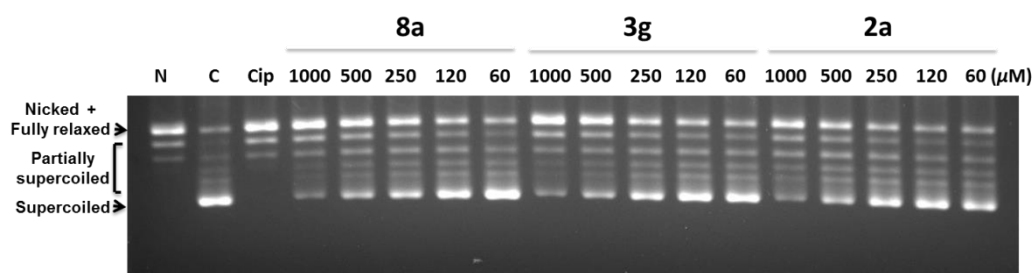

B) Inhibition of decatenation activity of *E. coli* topo IV by **2e** and **2a**

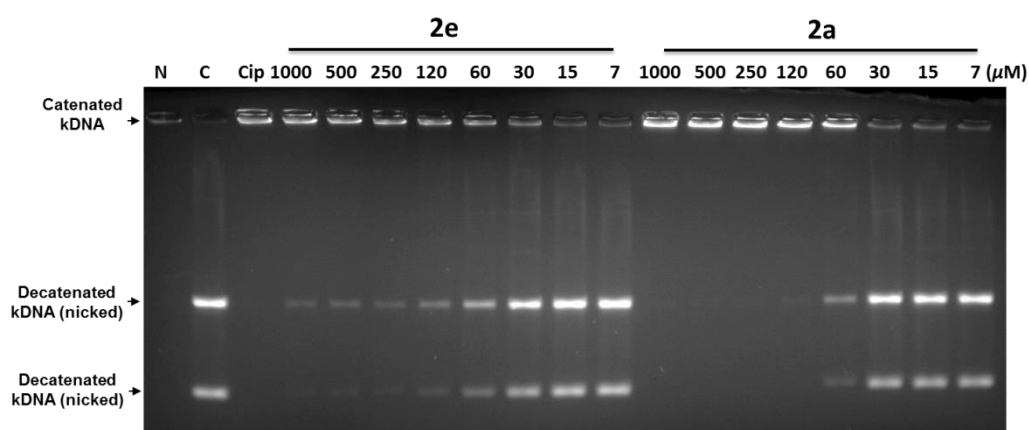

**Figure S2.** Inhibition against bacterial DNA gyrase and topo IV. (A) N = No enzyme added; Control (C) = DMSO; Cip = ciprofloxacin (150  $\mu$ M); Enzyme = 1.25 U *E. coli* gyrase, gyrase substrate = 300 ng relaxed plasmid DNA; Incubation 37  $^{\circ}$ C, 30 min. (B) N = No enzyme added; Control (C) = DMSO; Cip = ciprofloxacin (150  $\mu$ M); Enzyme = 0.25 U *E. coli* topoisomerase IV/lane, ATP = 1 mM; catenated kinetoplast DNA = 289 ng/lane; Incubation 37  $^{\circ}$ C, 30 min.
